# Supplementary material
Source: PubMed Central journal article supplement (PMC9631649)
Supplement: advancesADV2022007940-suppl1.pdf [file advancesADV2022007940-suppl1.pdf]

**ASH COVID-19 guideline manuscript reporting according to RIGHT checklist**

| <b>Domain</b>                                       | <b>RIGHT (topic)</b> | <b>ASH COVID-19 guideline manuscript (page)</b>                                        |
|-----------------------------------------------------|----------------------|----------------------------------------------------------------------------------------|
| <b>Basic information</b>                            |                      |                                                                                        |
| Title                                               | 1                    | 1                                                                                      |
| Authors                                             | -                    | 1-3 and Supplement 3                                                                   |
| Abstract                                            | -                    | 4                                                                                      |
| Executive summary                                   | 2                    | 5-6                                                                                    |
| Abbreviations and acronyms                          | 3                    | All abbreviations described within manuscript                                          |
| Corresponding developer                             | 4                    | 3                                                                                      |
| <b>Background</b>                                   |                      |                                                                                        |
| Brief description of the health problem             | 5                    | 7                                                                                      |
| Aims of the guideline and specific objectives       | 6                    | 7                                                                                      |
| Target populations                                  | 7                    | 7, and Table 2                                                                         |
| End users and settings                              | 8                    | Original 2021 ASH guidelines                                                           |
| Guideline development groups                        | 9                    | 8, and original 2021 ASH guidelines                                                    |
| <b>Evidence</b>                                     |                      |                                                                                        |
| Health care questions                               | 10                   | 9-10                                                                                   |
| Systematic reviews                                  | 11                   | 8, 9, 11-13 & original 2021 ASH guidelines & online Evidence Profile & Supplements 6-9 |
| Assessment of the certainty of the body of evidence | 12                   | 8, 9, 11-13 & online Evidence Profile                                                  |
| <b>Recommendations</b>                              |                      |                                                                                        |
| Recommendations                                     | 13                   | 9-11 & online Evidence-to-Decision framework & Table 1                                 |
| Rationale for recommendations                       | 14                   | 13-14 & online Evidence-to-Decision framework                                          |

|                                                            |    |                                                                                                                         |
|------------------------------------------------------------|----|-------------------------------------------------------------------------------------------------------------------------|
| Evidence to decision process                               | 15 | 8-14 & original 2021 ASH guidelines & online Evidence-to-Decision framework                                             |
| <b>Review and quality assurance</b>                        |    |                                                                                                                         |
| External review                                            | 16 | 9                                                                                                                       |
| Quality assurance                                          | 17 | 9                                                                                                                       |
| <b>Funding and declaration and management of interests</b> |    |                                                                                                                         |
| Funding sources and roles of the funder                    | 18 | 8 & original 2021 ASH guidelines                                                                                        |
| Declaration and management of interests                    | 19 | 8, 16 & Supplements 4-5                                                                                                 |
| <b>Other information</b>                                   |    |                                                                                                                         |
| Access                                                     | 20 | Whole document (e.g. citation to guideline, links to Evidence-to-Decision framework, Evidence Profile, and Supplements) |
| Suggestions for further research                           | 21 | 15 & online Evidence-to-Decision frameworks                                                                             |
| Limitations of the guideline                               | 22 | 14                                                                                                                      |
| Updating the guideline                                     | -  | 14                                                                                                                      |
| Applicability                                              | 14 | Whole document & online Evidence-to-Decision framework (e.g. feasibility, acceptability for the recommendation)         |
| Implementation                                             | -  | Original 2021 ASH guidelines, online Evidence-to-Decision framework                                                     |
| Monitoring                                                 | -  | Original 2021 ASH guidelines, online Evidence-to-Decision framework                                                     |
