# Supplementary material
Source: PubMed Central journal article supplement (PMC9631649)
Supplement: advancesADV2022007940-suppl3.pdf [file advancesADV2022007940-suppl3.pdf]

# Supplement 3: Membership of Guideline Panel, Methods Team, and Systematic Review Team

## Guideline Panelists

- Pantep Angchaisuksiri, MD (Ramathibodi Hospital, Mahidol University)
- Clifton Blair
- Adam Cuker, MD, MS (University of Pennsylvania)
- Kathryn Dane, PharmD (Johns Hopkins Hospital)
- Maria DeSancho, MD, MSc (Weill Cornell Medicine)
- David Diuguid, MD (Columbia University)
- Daniel Griffin, MD, PhD (Columbia University and ProHealth Care)
- Susan Kahn, MD, MSc (McGill University)
- F.A. “Eric” Klok, MD, PhD (Leiden University Medical Center Einthoven Laboratory)
- Alfred Lee, MD, PhD (Yale School of Medicine)
- Ignacio Neumann, MD, PhD (Pontificia Universidad Católica de Chile)
- Ashok Pai, MD (Kaiser Permanente, Oakland Medical Center)
- Marc Righini, MD (University of Geneva)
- Kristen Sanfilippo, MD, MPHS (Washington University School of Medicine in St. Louis)
- Holger Schünemann, MD, MSc, PhD (McMaster University)
- Deborah Siegal, MD, MSc (University of Ottawa)
- Mike Skara
- Deirdra Terrell, PhD, MPH (University of Oklahoma)
- Kamshad Touri
- Eric Tseng, MD, MSc (St. Michael’s Hospital)

## Methods Team

- Elie A. Akl, MD, PhD, MPH (American University of Beirut)
- Romina Brignardello-Petersen, PhD, MSc, DDS (McMaster University)
- Adam Cuker, MD, MS (University of Pennsylvania)
- Reem Mustafa, MBBS, PhD, MPH (University of Kansas)
- Ignacio Neumann, MD, PhD (Pontificia Universidad Católica de Chile)
- Robby Nieuwlaat, PhD, MSc (McMaster University)
- Holger Schönemann, MD, MSc, PhD (McMaster University)
- Adrienne Stevens, MSc, PhD (McMaster University)
- Wojtek Wiercioch, PhD, MSc (McMaster University)

## Systematic Review Team

- Reyad Al Jabiri, MD (University of Jordan)
- Yazan Al Jabiri, MD (Lincoln Medical Center)
- Angela M, Barbara, BSc, MSc, PhD (McMaster University)
- Antonio Bognanni, MD (McMaster University)
- Imad Bouakl, MD (American University of Beirut)
- Mary Ellene Boulos, BSc, MSc (McMaster University)
- Emma Cain, HBSc (McMaster University)
- Matthew Chan, MD (McMaster University)
- Rana Charide, BS, MPH (McMaster University)
- Luis Enrique Colunga Lozano, MD, MSc (Universidad de Guadalajara)
- Andrea J. Darzi, MD, PhD, MPH (McMaster University)
- Karin Dearness, BSc, MLS (St. Joseph's Healthcare, Hamilton, Ontario)

- Heba Hussein, BDS, MSc, PhD (Cairo University)
- Samer Karam, MD, MSc (McMaster University)
- Philipp Kolb, MBA, BHSc (McMaster University)
- Razan Mansour, MD (King Hussein Cancer Center)
- Gian Paolo Morgano, PhD, MSc (McMaster University)
- Rami Z. Morsi, MD (University of Chicago)
- Giovanna Muti-Schünemann, MD, MSc (McMaster University)
- Menatalla K. Nadim, MBBCh (Ain Shams University)
- Atefeh Noori, MSc, PhD (McMaster University)
- Binu Abraham Philip, BDS, MSc (McMaster University)
- Thomas Piggott, MD, MSc, CCFP, FRCPC (Labrador-Grenfell Health, Labrador, Canada)
- Yuan Yuan Qiu, BHSc (McMaster University)
- Yetiani Maria Roldan Benitez, MD (McMaster University)
- Finn Schünemann, MD (Klinikum Lueneburg)
- Karla Solo, MSc (McMaster University)
