# Supplementary material
Source: PubMed Central journal article supplement (PMC9631649)
Supplement: advancesADV2022007940-suppl5.pdf [file advancesADV2022007940-suppl5.pdf]

# Supplement 5: Participant Information Forms of the Methods and Systematic Review Teams

## Methods Team

- Elie A. Akl, MD, PhD, MPH (American University of Beirut)
- Romina Brignardello-Petersen, PhD, MSc, DDS (McMaster University)
- Adam Cuker, MD, MS (University of Pennsylvania)
- Reem Mustafa, MBBS, PhD, MPH (University of Kansas)
- Ignacio Neumann, MD, PhD (Pontificia Universidad Católica de Chile)
- Robby Nieuwlaat, PhD, MSc (McMaster University)
- Holger Schönemann, MD, MSc, PhD (McMaster University)
- Adrienne Stevens, MSc, PhD (McMaster University)
- Wojtek Wiercioch, PhD, MSc (McMaster University)

## Systematic Review Team

- Reyad Al Jabiri, MD (University of Jordan)
- Yazan Al Jabiri, MD (Lincoln Medical Center)
- Angela M, Barbara, BSc, MSc, PhD (McMaster University)
- Antonio Bognanni, MD (McMaster University)
- Imad Bouakl, MD (American University of Beirut)
- Mary Ellene Boulos, BSc, MSc (McMaster University)
- Emma Cain, HBSc (McMaster University)
- Matthew Chan, MD (McMaster University)
- Rana Charide, BS, MPH (McMaster University)
- Luis Enrique Colunga Lozano, MD, MSc (Universidad de Guadalajara)

- Andrea J. Darzi, MD, PhD, MPH (McMaster University)
- Karin Dearness, BSc, MLS (St. Joseph's Healthcare, Hamilton, Ontario)
- Heba Hussein, BDS, MDSc, PhD (Cairo University)
- Samer Karam, MD, MSc (McMaster University)
- Philipp Kolb, MBA, BHSc (McMaster University)
- Razan Mansour, MD (King Hussein Cancer Center)
- Gian Paolo Morgano, PhD, MSc (McMaster University)
- Rami Z. Morsi, MD (University of Chicago)
- Giovanna Muti-Schünemann, MD, MSc (McMaster University)
- Menatalla K. Nadim, MBBCh (Ain Shams University)
- Atefeh Noori, MSc, PhD (McMaster University)
- Binu Abraham Philip, BDS, MSc (McMaster University)
- Thomas Piggott, MD, MSc, CCFP, FRCPC (Labrador-Grenfell Health, Labrador, Canada)
- Yuan Yuan Qiu, BHSc (McMaster University)
- Yetiani Maria Roldan Benitez, MD (McMaster University)
- Finn Schünemann, MD (Klinikum Lueneburg)
- Karla Solo, MSc (McMaster University)

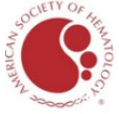

ASH Clinical Practice Guidelines  
Participant Information

---

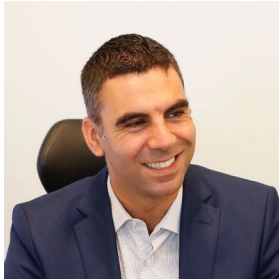

Elie Akl, MD, MPH, PhD

General Internist, Guideline methodologist

American University of Beirut

Beirut, Lebanon

---

### Project

ASH Clinical Practice Guidelines on Anticoagulation in Patients with COVID-19

### Role

Methods Team Member

### Profile

Dr. Elie Akl is a tenured Professor of Medicine at the American University of Beirut (AUB). He leads the division of General Internal Medicine and Geriatrics (GIMG) at AUBMC and directs the Clinical Research Institute (CRI) and the AUB GRADE Center. He has a part time appointment in the Department of Health Research Methods, Evidence, and Impact (HE&I) at McMaster University. His research expertise is in systematic reviews, practice guidelines, and conflicts of interest. He serves as a guideline methodologist for several North American professional organizations and the World Health Organization. He published more than 370 peer-reviewed papers and was listed by Thomson Reuters as one of the 2015 "world's most influential scientific minds" and as one of the "Highly Cited Researchers" yearly since 2015.

[June 19, 2020 profile approved by Dr. Akl]

## Section 1. Disclosures Prior to Participation

### Definitions

|                                             |                                                                                                                                                                                                                                                                                                                                                                                                                                                                                                                                                                                                                                                             |
|---------------------------------------------|-------------------------------------------------------------------------------------------------------------------------------------------------------------------------------------------------------------------------------------------------------------------------------------------------------------------------------------------------------------------------------------------------------------------------------------------------------------------------------------------------------------------------------------------------------------------------------------------------------------------------------------------------------------|
| <b><i>Conflict of interest</i></b>          | A situation in which a reasonable person would consider that an individual’s judgments or actions regarding any aspect of the guideline development process is, or could be perceived to be, influenced by an outside interest                                                                                                                                                                                                                                                                                                                                                                                                                              |
| <b><i>Financial interest</i></b>            | A position or relationship held by an individual that offers potential gain or loss of monetary value, such as employment, stock ownership, payment for services, or gifts given with the expectation of reciprocity                                                                                                                                                                                                                                                                                                                                                                                                                                        |
| <b><i>Direct financial interest</i></b>     | A financial interest that is owned by the individual or received directly by the individual                                                                                                                                                                                                                                                                                                                                                                                                                                                                                                                                                                 |
| <b><i>Indirect financial interest</i></b>   | A financial interest that is owned or received via an intermediary, e.g., research funding to an individual received through the individual’s academic institution                                                                                                                                                                                                                                                                                                                                                                                                                                                                                          |
| <b><i>For-profit healthcare company</i></b> | “A for-profit entity that develops, produces, markets, or distributes drugs, devices, services, or therapies used to diagnose, treat, monitor, manage, and alleviate health conditions. This definition is not intended to include non-profit entities, entities outside of the healthcare sector, or entities through which physicians provide clinical services directly to patients” (Council of Medical Specialty Societies’ “Code for Interactions With Industry” 2015). This definition is furthermore not viewed by ASH to include companies that provide accredited continuing medical education or that publish scientific or educational content. |

### Part A. Direct Financial Interests

#### Employment With For-Profit Healthcare Companies

1. Are you currently or in the past 24 months have you been an employee of any **for-profit healthcare company**?

No

Yes, as described below:

Add rows as needed for each employment relationship.

| <i>Company</i> | <i>Description</i> | <i>End Date</i> | <i>For ASH Internal Use</i> |
|----------------|--------------------|-----------------|-----------------------------|
|                |                    |                 |                             |

### Equity in For-Profit Healthcare Companies

2. Do you currently or in the past 24 months have you had equity in any **for-profit healthcare company**? Equity includes stock, stock options, and other ownership interests but excludes diversified mutual fund shares.

No

Yes, as described below:

Add rows as needed for each equity interest.

| <i>Company</i> | <i>Description</i> | <i>Date Divested</i> | <i>For ASH Internal Use</i> |
|----------------|--------------------|----------------------|-----------------------------|
|                |                    |                      |                             |

### Healthcare-Related Patents, Royalties, and Other Intellectual Property

3. Do you currently or in the past 24 months have you owned patents for or received royalties from any intellectual property or product used to diagnose, treat, monitor, manage, or alleviate health conditions?

No

Yes, as described below:

Add rows as needed for each patent or royalty interest.

| <i>Company</i> | <i>Description</i> | <i>Date Divested</i> | <i>For ASH Internal Use</i> |
|----------------|--------------------|----------------------|-----------------------------|
|                |                    |                      |                             |

### Personal Income or Other Direct Transfers of Value From For-Profit Healthcare Companies

4. Do you currently or in the past 24 months have you received any personal income or other direct transfers of value (e.g., honoraria, gifts, travel support, meeting registration, meals) from any **for-profit healthcare company**?

No

Yes, as described below:

Column 1 Name the company.

Column 2 Describe the activity for which you received the income or other transfer of value, e.g., research, consultancy, speakers bureau involvement, service on an advisory committee or board, expert testimony.

Column 3 Indicate when the activity ended, if applicable. (If the activity has not yet ended, indicate “current” or “ongoing.”)

Add rows as needed for each activity.

| <i>Company</i> | <i>Description</i> | <i>End Date</i> | <i>For ASH Internal Use</i> |
|----------------|--------------------|-----------------|-----------------------------|
|                |                    |                 |                             |

#### My Partner’s or Spouse’s Interests

5. Currently or in the past 24 months has *your partner or spouse* had any of the interests or relationships described in questions 1-4?

No

Yes, as described below:

Add rows as needed for each interest.

| <i>Company</i> | <i>Description</i> | <i>End Date</i> | <i>For ASH Internal Use</i> |
|----------------|--------------------|-----------------|-----------------------------|
|                |                    |                 |                             |

#### Other Relevant Direct Financial Interests

6. Do you have other current or recent (within the past 24 months) **direct financial interests** with any institution, organization, entity or individual that could be relevant to the work of developing these guidelines?

No

Yes

If yes, please explain:

## Part B. Indirect Financial Interests

### Institutional Research Funded by For-Profit Healthcare Companies

1. Through your institution, do you currently or in the past 24 months have you been involved in research funded or supported (e.g., in kind support, such as provision of a study drug) by any **for-profit healthcare company**?

No

Yes, as described below:

Column 1 Name the company funding or supporting the research.

Column 2 Briefly describe the research project.

Column 3 Describe your role: (a) national or overall principal investigator, (b) member of a steering committee of a study that does not have a principal investigator, (c) site or local investigator. If other than these options, please describe.

Column 4 Indicate when your involvement ended, if applicable. (If your involvement has not yet ended, indicate “current” or “ongoing.”)

Add rows as needed for each research project.

| <i>Company</i> | <i>Description of Research</i> | <i>My Role</i> | <i>End Date</i> | <i>For ASH Internal Use</i> |
|----------------|--------------------------------|----------------|-----------------|-----------------------------|
|                |                                |                |                 |                             |

### Paid and Volunteer Activities for Organizations Supported by For-Profit Healthcare Companies

2. Do you currently or in the past 24 months have you been involved in any volunteer or paid work for an organization that is wholly or partially funded by any **for-profit healthcare company**?

No

Yes, as described below:

Column 1 Name the organization. If known to you, describe any industry funding or support.

Column 2 Briefly describe your activity and role, e.g., employment, service on board of directors, other volunteer services.

Column 3 Indicate if your activity was paid or volunteered.

Column 4 Indicate when your involvement with the organization ended. (If your involvement has not yet ended, indicate “current” or “ongoing.”)

Add rows as needed for each organization.

| <i>Organization</i> | <i>Description and role</i> | <i>Paid or Unpaid?</i> | <i>End Date</i> | <i>For ASH Internal Use</i> |
|---------------------|-----------------------------|------------------------|-----------------|-----------------------------|
|                     |                             |                        |                 |                             |

Other Relevant Indirect Financial Interests

3. Do you have other **indirect financial interests** with any: (i) **for-profit healthcare** company; or (ii) other institution, organization, entity or individual that could be relevant to the work of developing these guidelines?

No

Yes

If yes, please explain:



## Part C. Relevant Other Interests That Are Not Mainly Financial

### Personal Beliefs

1. Do you have strongly held beliefs related to the topic of these guidelines?

No

Yes

If yes, please explain:

### Previously Published Opinions

2. Have you ever authored, coauthored, or publicly provided an opinion related to the topic of these guidelines, e.g., a clinical practice guideline, textbook, review article, meeting poster or presentation, grand rounds talk, letter to the editor?

No

Yes

If yes, what were those views and where were they made?

### Non-Industry Supported Research

3. Currently or in the past 24 months, have you been involved in a leadership role in any research project not already reported under Part B, Question 1, relevant to the topic of these guidelines, e.g., a research project funded by a nonprofit or governmental organization?

No

Yes, as described below:

Column 1 Name the entity funding the research.

Column 2 Describe the research project.

Column 3 Describe your role: (a) national or overall principal investigator, (b) member of a steering committee of a study that does not have a principal investigator, (c) site or local investigator. If other than these options, please describe.

Column 4 Indicate when your involvement ended, if applicable. (If your involvement has not yet ended, indicate "current" or "ongoing.")

Add rows as needed for each research project.

| <i>Funder</i> | <i>Description of Research</i> | <i>My Role</i> | <i>End Date</i> |
|---------------|--------------------------------|----------------|-----------------|
|               |                                |                |                 |

### Institutional Relationships

4. Could your compensation be affected by recommendations on this topic?

Don't know

No

Yes

If yes, please explain:

5. Do you generate revenues for your institution or employer by clinical activity, teaching, speaking, consulting, testifying, writing, or otherwise sharing your knowledge or opinions about this guideline topic?

Don't know

No

Yes

If yes, please explain:

6. Could your institution benefit or be harmed by guidelines on this topic?

Don't know

No

Yes

If yes, please explain:

### Career Advancement

7. How would you characterize the support you would receive from your primary mentor, institution, or other entities if your work on this panel or authorship of these guidelines generated a strong reaction from peers outside your institution?

Good support

### Involvement in Organizations With Relevant Policies, Positions, or Guidelines

8. Are you involved as an employee, volunteer, or member of any organization that has published or to your knowledge is currently developing policies, positions, or guidelines relevant to these ASH guidelines, e.g., clinical practice guidelines, appropriate use criteria, expert consensus statement, mission statement, advocacy statement, amicus brief, or legislature or legal testimony?

No

Yes, as described below:

Column 1 Name the organization.

Column 2 Describe or reference the relevant policy, position, or guidelines.

Column 3 Describe your role with the organization, including your involvement in developing, disseminating, or implementing the relevant policy, position, or guidelines.

Add rows as needed for each organization.

| <i>Organization</i> | <i>Relevant Policy Position</i> | <i>Your Role</i> |
|---------------------|---------------------------------|------------------|
|                     |                                 |                  |

#### Clinical Practice

9. Do you see patients clinically?

No

Yes

If yes, what is your primary specialty or subspecialty?

General Internal Medicine; General Preventive Medicine

If yes, do you prescribe or otherwise recommend clinical interventions (e.g., screening or diagnostic tests, evaluations, treatments, procedures) that may be addressed by these guidelines?

No

Yes

If yes, please explain:

I do see patients who might receive anticoagulation for prophylactic or therapeutic purposes. However, I am not assigned to provide care to patients with confirmed or suspected COVID19

#### Other

10. Do you have other nonfinancial interests or relationships not described above that could be relevant to the work of developing these guidelines?

No

Yes

If yes, please describe:

### Expected Interests

11. Do you expect to enter into, within the next 24 months, any new **financial or nonfinancial interests** not described above that could be relevant to the work of developing these guidelines?

No

Yes

If yes, please describe:

## Section 2. Attestation of Compliance With Conflict of Interest Policies

In consideration of my participation on these guidelines, I hereby certify and agree that:

| <i>Policy</i>                                                                                                                                                                                                                                                                                                                                                                                                                                                                                                                                                                                                                                                                                                                                                                                                                                                                                                                                                                                                                                                                                                                                                                                                             | <i>Initials</i> |
|---------------------------------------------------------------------------------------------------------------------------------------------------------------------------------------------------------------------------------------------------------------------------------------------------------------------------------------------------------------------------------------------------------------------------------------------------------------------------------------------------------------------------------------------------------------------------------------------------------------------------------------------------------------------------------------------------------------------------------------------------------------------------------------------------------------------------------------------------------------------------------------------------------------------------------------------------------------------------------------------------------------------------------------------------------------------------------------------------------------------------------------------------------------------------------------------------------------------------|-----------------|
| I have reviewed and understand the ASH Principles and Policies on Conflict of Interest published on the ASH website at <a href="https://www.hematology.org/about/governance/conflict-of-interest">https://www.hematology.org/about/governance/conflict-of-interest</a> including the special Policy on Management of Conflicts in the Development of Clinical Practice Guidelines (“ASH Policy”).                                                                                                                                                                                                                                                                                                                                                                                                                                                                                                                                                                                                                                                                                                                                                                                                                         | EA              |
| I have disclosed and will continue to disclose completely all potential conflicts of interest for myself and for my partner or spouse, to the best of my ability and knowledge, in accordance with ASH Policy and this Disclosure Form.                                                                                                                                                                                                                                                                                                                                                                                                                                                                                                                                                                                                                                                                                                                                                                                                                                                                                                                                                                                   | EA              |
| To ensure completeness and avoid discrepancies, I have checked and periodically will check my financial disclosures against other published information, including from the U.S. Centers for Medicare and Medicaid Services’ Open Payments database (or similar non-U.S. database) and explain any discrepant information.                                                                                                                                                                                                                                                                                                                                                                                                                                                                                                                                                                                                                                                                                                                                                                                                                                                                                                | EA              |
| <p>Until submission of the guidelines for publication, I understand and agree that without special exception from ASH, any of the following will disqualify me from continued participation and I will not enter into:</p> <ul style="list-style-type: none"> <li>• Any <b>direct financial interest</b> of myself or my partner or spouse in any <b>for-profit healthcare company or companies</b>, if such interests in aggregate may be reasonably valued to be &gt;\$5,000/year, regardless of relevance to the guidelines</li> <li>• Any noneducational speaking by myself on behalf of any <b>for-profit healthcare company</b> (e.g., service on a company “speakers bureau”), regardless of relevance to the guidelines</li> <li>• Consulting or advising about the marketing of products by any <b>for-profit healthcare company</b> (e.g., service on a company “advisory board”), regardless of relevance to the guidelines</li> <li>• Simultaneous participation on guidelines by another organization on the same topic</li> <li>• Any <i>undisclosed</i> financial interest in any <b>for-profit healthcare company</b> occurring in the 24 months prior to my participation on these guidelines</li> </ul> | EA              |
| I understand that if a disqualifying interest is reported, the usual course of action will be dismissal from participation and acknowledgment within the guideline publication rather than authorship.                                                                                                                                                                                                                                                                                                                                                                                                                                                                                                                                                                                                                                                                                                                                                                                                                                                                                                                                                                                                                    | EA              |
| At regular intervals during the guideline development process, as determined by ASH, I will review my information in this Disclosure Form; provide updated disclosures; and, if requested, attest that I do not have any interests that should disqualify my participation.                                                                                                                                                                                                                                                                                                                                                                                                                                                                                                                                                                                                                                                                                                                                                                                                                                                                                                                                               | EA              |

| <i>Policy</i>                                                                                                                                                                                                               | <i>Initials</i> |
|-----------------------------------------------------------------------------------------------------------------------------------------------------------------------------------------------------------------------------|-----------------|
| I agree to publish with the guidelines my complete disclosures, this agreement, and future attestations.                                                                                                                    | EA              |
| I understand that for 1 year following initial publication of the guidelines, I am encouraged by ASH to avoid new conflicts of interest that could reduce trust in the guidelines, in accordance with my own best judgment. | EA              |

Agreed by

Elie Akl

Date

July 10, 2020

### Section 3. ASH Review Prior to Participation

For ASH Internal Use Only

| <i>Name, Role</i>                                                      | <i>Date</i>   | <i>Management Notes</i> |
|------------------------------------------------------------------------|---------------|-------------------------|
| Eddrika Russell, ASH staff                                             | July 14, 2020 |                         |
| Menaka Pai, MD, ex officio, ASH<br>Guideline Oversight<br>Subcommittee | July 14, 2020 | Participation approved  |

## Section 4. Disclosures and Attestations During Participation

For ASH Internal Use Only

| <i>Disclosure or attestation</i> | <i>Date</i>      | <i>Reviewed by</i>           | <i>Management Notes</i>                                                |
|----------------------------------|------------------|------------------------------|------------------------------------------------------------------------|
| Attestation                      | June 29, 2021    | Russell                      | Dr. Akl agreed to continue to adhere to the policies described herein. |
| Attestation                      | October 7, 2021  | Russell                      | Dr. Akl agreed to continue to adhere to the policies described herein. |
| Attestation                      | January 18, 2022 | Kendall Alexander, ASH staff | Dr. Akl agreed to continue to adhere to the policies described herein. |
|                                  | March 30, 2022   | Deion Smith, ASH Staff       | Dr. Akl confirmed that all information in this form is correct.        |



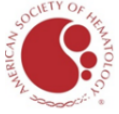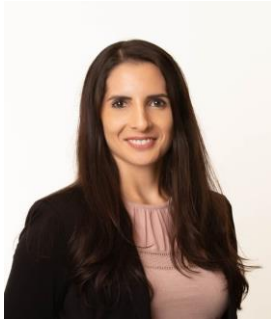

## Romina Brignardello-Petersen, PhD, MSc, DDS

Assistant Professor

McMaster University

Hamilton, Ontario, Canada

---

### Project

ASH Clinical Practice Guidelines on Anticoagulation in Patients with COVID-19

### Role

Methods Team Member

### Profile

Dr. Romina Brignardello-Petersen is an Assistant Professor at the Department of Health Research Methods, Evidence, and Impact, at McMaster University. Her research focuses on methods to develop systematic reviews with multiple comparisons and clinical practice guidelines, in particular those developed using the GRADE approach. Dr. Brignardello-Petersen has worked as a guideline methodologist for several organizations, including the World Health Organization, the Pan-American Health Organization, and the American Society of Hematology (Acute Myeloid Leukemia and von Willebrand disease guidelines).

[July 15, 2020 profile approved by Dr. Brignardello-Petersen]

# 1. Disclosures Prior to Participation

## Definitions

- Conflict of interest** A situation in which a reasonable person would consider that an individual’s judgments or actions regarding any aspect of the guideline development process is, or could be perceived to be, influenced by an outside interest
- Financial interest** A position or relationship held by an individual that offers potential gain or loss of monetary value, such as employment, stock ownership, payment for services, or gifts given with the expectation of reciprocity
- Direct financial interest** A financial interest that is owned by the individual or received directly by the individual
- Indirect financial interest** A financial interest that is owned or received via an intermediary, e.g., research funding to an individual received through the individual’s academic institution
- For-profit healthcare company** “A for-profit entity that develops, produces, markets, or distributes drugs, devices, services, or therapies used to diagnose, treat, monitor, manage, and alleviate health conditions. This definition is not intended to include non-profit entities, entities outside of the healthcare sector, or entities through which physicians provide clinical services directly to patients” (Council of Medical Specialty Societies’ “Code for Interactions With Industry” 2015). This definition is furthermore not viewed by ASH to include companies that provide accredited continuing medical education or that publish scientific or educational content.

## Part A. Direct Financial Interests

### Employment With For-Profit Healthcare Companies

1. Are you currently or in the past 24 months have you been an employee of any **for-profit healthcare company**?

No

Yes, as described below:

Add rows as needed for each employment relationship.

| <i>Company</i> | <i>Description</i> | <i>End Date</i> | <i>For ASH Internal Use</i> |
|----------------|--------------------|-----------------|-----------------------------|
|                |                    |                 |                             |

### Equity in For-Profit Healthcare Companies

2. Do you currently or in the past 24 months have you had equity in any **for-profit healthcare company**? Equity includes stock, stock options, and other ownership interests but excludes diversified mutual fund shares.

No

Yes, as described below:

Add rows as needed for each equity interest.

| <i>Company</i> | <i>Description</i> | <i>Date Divested</i> | <i>For ASH Internal Use</i> |
|----------------|--------------------|----------------------|-----------------------------|
|                |                    |                      |                             |

### Healthcare-Related Patents, Royalties, and Other Intellectual Property

3. Do you currently or in the past 24 months have you owned patents for or received royalties from any intellectual property or product used to diagnose, treat, monitor, manage, or alleviate health conditions?

No

Yes, as described below:

Add rows as needed for each patent or royalty interest.

| <i>Company</i> | <i>Description</i> | <i>Date Divested</i> | <i>For ASH Internal Use</i> |
|----------------|--------------------|----------------------|-----------------------------|
|                |                    |                      |                             |

### Personal Income or Other Direct Transfers of Value From For-Profit Healthcare Companies

4. Do you currently or in the past 24 months have you received any personal income or other direct transfers of value (e.g., honoraria, gifts, travel support, meeting registration, meals) from any **for-profit healthcare company**?

No

Yes, as described below:

Column 1 Name the company.

Column 2 Describe the activity for which you received the income or other transfer of value, e.g., research, consultancy, speakers bureau involvement, service on an advisory committee or board, expert testimony.

Column 3 Indicate when the activity ended, if applicable. (If the activity has not yet ended, indicate “current” or “ongoing.”)

Add rows as needed for each activity.

| <i>Company</i> | <i>Description</i> | <i>End Date</i> | <i>For ASH Internal Use</i> |
|----------------|--------------------|-----------------|-----------------------------|
|                |                    |                 |                             |

#### My Partner’s or Spouse’s Interests

5. Currently or in the past 24 months has *your partner or spouse* had any of the interests or relationships described in questions 1-4?

No

Yes, as described below:

Add rows as needed for each interest.

| <i>Company</i> | <i>Description</i> | <i>End Date</i> | <i>For ASH Internal Use</i> |
|----------------|--------------------|-----------------|-----------------------------|
|                |                    |                 |                             |

#### Other Relevant Direct Financial Interests

6. Do you have other current or recent (within the past 24 months) **direct financial interests** with any institution, organization, entity or individual that could be relevant to the work of developing these guidelines?

No

Yes

If yes, please explain:

## Part B. Indirect Financial Interests

### Institutional Research Funded by For-Profit Healthcare Companies

1. Through your institution, do you currently or in the past 24 months have you been involved in research funded or supported (e.g., in kind support, such as provision of a study drug) by any **for-profit healthcare company**?

No

Yes, as described below:

Column 1 Name the company funding or supporting the research.

Column 2 Briefly describe the research project.

Column 3 Describe your role: (a) national or overall principal investigator, (b) member of a steering committee of a study that does not have a principal investigator, (c) site or local investigator. If other than these options, please describe.

Column 4 Indicate when your involvement ended, if applicable. (If your involvement has not yet ended, indicate “current” or “ongoing.”)

Add rows as needed for each research project.

| <i>Company</i> | <i>Description of Research</i> | <i>My Role</i> | <i>End Date</i> | <i>For ASH Internal Use</i> |
|----------------|--------------------------------|----------------|-----------------|-----------------------------|
|                |                                |                |                 |                             |

### Paid and Volunteer Activities for Organizations Supported by For-Profit Healthcare Companies

2. Do you currently or in the past 24 months have you been involved in any volunteer or paid work for an organization that is wholly or partially funded by any **for-profit healthcare company**?

No

Yes, as described below:

Column 1 Name the organization. If known to you, describe any industry funding or support.

Column 2 Briefly describe your activity and role, e.g., employment, service on board of directors, other volunteer services.

Column 3 Indicate if your activity was paid or volunteered.

Column 4 Indicate when your involvement with the organization ended. (If your involvement has not yet ended, indicate “current” or “ongoing.”)

Add rows as needed for each organization.

| <i>Organization</i> | <i>Description and role</i> | <i>Paid or Unpaid?</i> | <i>End Date</i> | <i>For ASH Internal Use</i> |
|---------------------|-----------------------------|------------------------|-----------------|-----------------------------|
|                     |                             |                        |                 |                             |

Other Relevant Indirect Financial Interests

3. Do you have other **indirect financial interests** with any: (i) **for-profit healthcare** company; or (ii) other institution, organization, entity or individual that could be relevant to the work of developing these guidelines?

No

Yes

If yes, please explain:

## Part C. Relevant Other Interests That Are Not Mainly Financial

### Personal Beliefs

1. Do you have strongly held beliefs related to the topic of these guidelines?

No

Yes

If yes, please explain:

### Previously Published Opinions

2. Have you ever authored, coauthored, or publicly provided an opinion related to the topic of these guidelines, e.g., a clinical practice guideline, textbook, review article, meeting poster or presentation, grand rounds talk, letter to the editor?

No

Yes

If yes, what were those views and where were they made?

### Non-Industry Supported Research

3. Currently or in the past 24 months, have you been involved in a leadership role in any research project not already reported under Part B, Question 1, relevant to the topic of these guidelines, e.g., a research project funded by a nonprofit or governmental organization?

No

Yes, as described below:

Column 1 Name the entity funding the research.

Column 2 Describe the research project.

Column 3 Describe your role: (a) national or overall principal investigator, (b) member of a steering committee of a study that does not have a principal investigator, (c) site or local investigator. If other than these options, please describe.

Column 4 Indicate when your involvement ended, if applicable. (If your involvement has not yet ended, indicate "current" or "ongoing.")

Add rows as needed for each research project.

| <i>Funder</i> | <i>Description of Research</i> | <i>My Role</i> | <i>End Date</i> |
|---------------|--------------------------------|----------------|-----------------|
|               |                                |                |                 |

### Institutional Relationships

4. Could your compensation be affected by recommendations on this topic?

Don't know

No

Yes

If yes, please explain:

5. Do you generate revenues for your institution or employer by clinical activity, teaching, speaking, consulting, testifying, writing, or otherwise sharing your knowledge or opinions about this guideline topic?

Don't know

No

Yes

If yes, please explain:

6. Could your institution benefit or be harmed by guidelines on this topic?

Don't know

No

Yes

If yes, please explain:

### Career Advancement

7. How would you characterize the support you would receive from your primary mentor, institution, or other entities if your work on this panel or authorship of these guidelines generated a strong reaction from peers outside your institution?

Supportive

### Involvement in Organizations With Relevant Policies, Positions, or Guidelines

8. Are you involved as an employee, volunteer, or member of any organization that has published or to your knowledge is currently developing policies, positions, or guidelines relevant to these ASH



guidelines, e.g., clinical practice guidelines, appropriate use criteria, expert consensus statement, mission statement, advocacy statement, amicus brief, or legislature or legal testimony?

No

Yes, as described below:

Column 1 Name the organization.

Column 2 Describe or reference the relevant policy, position, or guidelines.

Column 3 Describe your role with the organization, including your involvement in developing, disseminating, or implementing the relevant policy, position, or guidelines.

Add rows as needed for each organization.

| <i>Organization</i> | <i>Relevant Policy Position</i> | <i>Your Role</i> |
|---------------------|---------------------------------|------------------|
|                     |                                 |                  |

#### Clinical Practice

9. Do you see patients clinically?

No

Yes

If yes, what is your primary specialty or subspecialty?

If yes, do you prescribe or otherwise recommend clinical interventions (e.g., screening or diagnostic tests, evaluations, treatments, procedures) that may be addressed by these guidelines?

No

Yes

If yes, please explain:

#### Other

10. Do you have other nonfinancial interests or relationships not described above that could be relevant to the work of developing these guidelines?

No

Yes

If yes, please describe:

#### Expected Interests

11. Do you expect to enter into, within the next 24 months, any new **financial or nonfinancial interests** not described above that could be relevant to the work of developing these guidelines?

No

Yes

If yes, please describe:

## Section 2. Attestation of Compliance With Conflict of Interest Policies

In consideration of my participation on these guidelines, I hereby certify and agree that:

| <i>Policy</i>                                                                                                                                                                                                                                                                                                                                                                                                                                                                                                                                                                                                                                                                                                                                                                                                                                                                                                                                                                                                                                                                                                                                                                                                             | <i>Initials</i> |
|---------------------------------------------------------------------------------------------------------------------------------------------------------------------------------------------------------------------------------------------------------------------------------------------------------------------------------------------------------------------------------------------------------------------------------------------------------------------------------------------------------------------------------------------------------------------------------------------------------------------------------------------------------------------------------------------------------------------------------------------------------------------------------------------------------------------------------------------------------------------------------------------------------------------------------------------------------------------------------------------------------------------------------------------------------------------------------------------------------------------------------------------------------------------------------------------------------------------------|-----------------|
| I have reviewed and understand the ASH Principles and Policies on Conflict of Interest published on the ASH website at <a href="https://www.hematology.org/about/governance/conflict-of-interest">https://www.hematology.org/about/governance/conflict-of-interest</a> including the special Policy on Management of Conflicts in the Development of Clinical Practice Guidelines (“ASH Policy”).                                                                                                                                                                                                                                                                                                                                                                                                                                                                                                                                                                                                                                                                                                                                                                                                                         | RBP             |
| I have disclosed and will continue to disclose completely all potential conflicts of interest for myself and for my partner or spouse, to the best of my ability and knowledge, in accordance with ASH Policy and this Disclosure Form.                                                                                                                                                                                                                                                                                                                                                                                                                                                                                                                                                                                                                                                                                                                                                                                                                                                                                                                                                                                   | RBP             |
| To ensure completeness and avoid discrepancies, I have checked and periodically will check my financial disclosures against other published information, including from the U.S. Centers for Medicare and Medicaid Services’ Open Payments database (or similar non-U.S. database) and explain any discrepant information.                                                                                                                                                                                                                                                                                                                                                                                                                                                                                                                                                                                                                                                                                                                                                                                                                                                                                                | RBP             |
| <p>Until submission of the guidelines for publication, I understand and agree that without special exception from ASH, any of the following will disqualify me from continued participation and I will not enter into:</p> <ul style="list-style-type: none"> <li>• Any <b>direct financial interest</b> of myself or my partner or spouse in any <b>for-profit healthcare company or companies</b>, if such interests in aggregate may be reasonably valued to be &gt;\$5,000/year, regardless of relevance to the guidelines</li> <li>• Any noneducational speaking by myself on behalf of any <b>for-profit healthcare company</b> (e.g., service on a company “speakers bureau”), regardless of relevance to the guidelines</li> <li>• Consulting or advising about the marketing of products by any <b>for-profit healthcare company</b> (e.g., service on a company “advisory board”), regardless of relevance to the guidelines</li> <li>• Simultaneous participation on guidelines by another organization on the same topic</li> <li>• Any <i>undisclosed</i> financial interest in any <b>for-profit healthcare company</b> occurring in the 24 months prior to my participation on these guidelines</li> </ul> | RBP             |
| I understand that if a disqualifying interest is reported, the usual course of action will be dismissal from participation and acknowledgment within the guideline publication rather than authorship.                                                                                                                                                                                                                                                                                                                                                                                                                                                                                                                                                                                                                                                                                                                                                                                                                                                                                                                                                                                                                    | RBP             |
| At regular intervals during the guideline development process, as determined by ASH, I will review my information in this Disclosure Form; provide updated disclosures; and, if requested, attest that I do not have any interests that should disqualify my participation.                                                                                                                                                                                                                                                                                                                                                                                                                                                                                                                                                                                                                                                                                                                                                                                                                                                                                                                                               | RBP             |

|                                                                                                                                                                                                                             |     |
|-----------------------------------------------------------------------------------------------------------------------------------------------------------------------------------------------------------------------------|-----|
| I agree to publish with the guidelines my complete disclosures, this agreement, and future attestations.                                                                                                                    | RBP |
| I understand that for 1 year following initial publication of the guidelines, I am encouraged by ASH to avoid new conflicts of interest that could reduce trust in the guidelines, in accordance with my own best judgment. | RBP |

Agreed by

Romina Brignardello-Petersen

Date

July 2, 2020

### Section 3. ASH Review Prior to Participation

For ASH Internal Use Only

| <i>Name, Role</i>                                                     | <i>Date</i>   | <i>Management Notes</i> |
|-----------------------------------------------------------------------|---------------|-------------------------|
| Eddrika Russell, ASH Staff                                            | July 14, 2020 |                         |
| Menaka Pai, MD, Ex Officio ASH<br>Guideline Oversight<br>Subcommittee | July 14, 2020 | Participation approved  |

## Section 4. Disclosures and Attestations During Participation

For ASH Internal Use Only

| <i>Disclosure or attestation</i> | <i>Date</i>      | <i>Reviewed by</i>     | <i>Management Notes</i>                                                                  |
|----------------------------------|------------------|------------------------|------------------------------------------------------------------------------------------|
| Attestation                      | June 29, 2021    | Russell                | Dr. Brignardello-Petersen agreed to continue to adhere to the policies described herein. |
| Attestation                      | October 6, 2021  | Russell                | Dr. Brignardello-Petersen agreed to continue to adhere to the policies described herein. |
| Attestation                      | January 19, 2022 | Deion Smith, ASH Staff | Dr. Brignardello-Petersen agreed to continue to adhere to the policies described herein. |
|                                  | April 4, 2022    | Smith                  | Dr. Brignardello-Petersen confirmed that all information in the form is correct.         |



ASH Clinical Practice Guidelines  
Participant Information

---

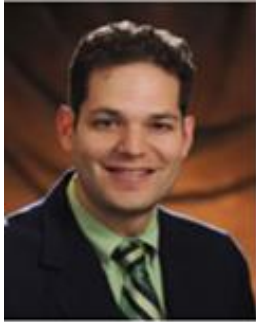

## Adam Cuker, MD, MS

Associate Professor of Medicine at the Hospital of the University of Pennsylvania

Perelman School of Medicine, University of Pennsylvania

Philadelphia, Pennsylvania, United States

---

### Project

ASH Clinical Practice Guidelines on Anticoagulation in Patients With COVID-19

### Role

Clinical co-chair of Guideline Panel (June 2020 – February 2022)

Member of Guideline Panel (March 2022 - )

### Profile

Dr. Cuker is a hematologist specializing in hemostasis and thrombosis at the University of Pennsylvania. He has clinical and research expertise in thrombosis, and an interest in guideline methodology. He is a member of ASH's Guideline Oversight Subcommittee and Committee on Quality.

[June 16, 2020 profile approved by Dr. Cuker]

## Section 1. Disclosures Prior to Participation

### Definitions

**Conflict of interest**

A situation in which a reasonable person would consider that an individual’s judgments or actions regarding any aspect of the guideline development process is, or could be perceived to be, influenced by an outside interest

**Financial interest**

A position or relationship held by an individual that offers potential gain or loss of monetary value, such as employment, stock ownership, payment for services, or gifts given with the expectation of reciprocity

**Direct financial interest**

A financial interest that is owned by the individual or received directly by the individual

**Indirect financial interest**

A financial interest that is owned or received via an intermediary, e.g., research funding to an individual received through the individual’s academic institution

**For-profit healthcare company**

“A for-profit entity that develops, produces, markets, or distributes drugs, devices, services, or therapies used to diagnose, treat, monitor, manage, and alleviate health conditions. This definition is not intended to include non-profit entities, entities outside of the healthcare sector, or entities through which physicians provide clinical services directly to patients” (Council of Medical Specialty Societies’ “Code for Interactions With Industry” 2015). This definition is furthermore not viewed by ASH to include companies that provide accredited continuing medical education or that publish scientific or educational content.

### Part A. Direct Financial Interests

#### Employment With For-Profit Healthcare Companies

1. Are you currently or in the past 24 months have you been an employee of any **for-profit healthcare company**?

No

Yes, as described below:

Add rows as needed for each employment relationship.

| <i>Company</i> | <i>Description</i> | <i>End Date</i> | <i>For ASH Internal Use</i> |
|----------------|--------------------|-----------------|-----------------------------|
|                |                    |                 |                             |
|                |                    |                 |                             |



| <i>Company</i> | <i>Description</i> | <i>End Date</i> | <i>For ASH Internal Use</i> |
|----------------|--------------------|-----------------|-----------------------------|
|                |                    |                 |                             |
|                |                    |                 |                             |

Equity in For-Profit Healthcare Companies

2. Do you currently or in the past 24 months have you had equity in any **for-profit healthcare company**? Equity includes stock, stock options, and other ownership interests but excludes diversified mutual fund shares.

No

Yes, as described below:

Add rows as needed for each equity interest.

| <i>Company</i> | <i>Description</i> | <i>Date Divested</i> | <i>For ASH Internal Use</i> |
|----------------|--------------------|----------------------|-----------------------------|
|                |                    |                      |                             |
|                |                    |                      |                             |
|                |                    |                      |                             |
|                |                    |                      |                             |

Healthcare-Related Patents, Royalties, and Other Intellectual Property

3. Do you currently or in the past 24 months have you owned patents for or received royalties from any intellectual property or product used to diagnose, treat, monitor, manage, or alleviate health conditions?

No

Yes, as described below:

Add rows as needed for each patent or royalty interest.

| <i>Company</i> | <i>Description</i> | <i>Date Divested</i> | <i>For ASH Internal Use</i> |
|----------------|--------------------|----------------------|-----------------------------|
|                |                    |                      |                             |
|                |                    |                      |                             |
|                |                    |                      |                             |
|                |                    |                      |                             |

Personal Income or Other Direct Transfers of Value From For-Profit Healthcare Companies

4. Do you currently or in the past 24 months have you received any personal income or other direct transfers of value (e.g., honoraria, gifts, travel support, meeting registration, meals) from any **for-profit healthcare company**?

No

Yes, as described below:

Column 1 Name the company.

Column 2 Describe the activity for which you received the income or other transfer of value, e.g., research, consultancy, speakers bureau involvement, service on an advisory committee or board, expert testimony.

Column 3 Indicate when the activity ended, if applicable. (If the activity has not yet ended, indicate “current” or “ongoing.”)

Add rows as needed for each activity.

| <i>Company</i> | <i>Description</i> | <i>End Date</i> | <i>For ASH Internal Use</i> |
|----------------|--------------------|-----------------|-----------------------------|
|                |                    |                 |                             |
|                |                    |                 |                             |
|                |                    |                 |                             |
|                |                    |                 |                             |
|                |                    |                 |                             |
|                |                    |                 |                             |
|                |                    |                 |                             |
|                |                    |                 |                             |

My Partner’s or Spouse’s Interests

5. Currently or in the past 24 months has *your partner or spouse* had any of the interests or relationships described in questions 1-4?

No

Yes, as described below:

Add rows as needed for each interest.

| <i>Company</i> | <i>Description</i> | <i>End Date</i> | <i>For ASH Internal Use</i> |
|----------------|--------------------|-----------------|-----------------------------|
|                |                    |                 |                             |

| <i>Company</i> | <i>Description</i> | <i>End Date</i> | <i>For ASH Internal Use</i> |
|----------------|--------------------|-----------------|-----------------------------|
|                |                    |                 |                             |
|                |                    |                 |                             |

Other Relevant Direct Financial Interests

6. Do you have other current or recent (within the past 24 months) **direct financial interests** with any institution, organization, entity or individual that could be relevant to the work of developing these guidelines?

No

Yes

If yes, please explain:

## Part B. Indirect Financial Interests

### Institutional Research Funded by For-Profit Healthcare Companies

1. Through your institution, do you currently or in the past 24 months have you been involved in research funded or supported (e.g., in kind support, such as provision of a study drug) by any **for-profit healthcare company**?

No

Yes, as described below:

Column 1 Name the company funding or supporting the research.

Column 2 Briefly describe the research project.

Column 3 Describe your role: (a) national or overall principal investigator, (b) member of a steering committee of a study that does not have a principal investigator, (c) site or local investigator. If other than these options, please describe.

Column 4 Indicate when your involvement ended, if applicable. (If your involvement has not yet ended, indicate “current” or “ongoing.”)

Add rows as needed for each research project.

| <i>Company</i> | <i>Description of Research</i> | <i>My Role</i> | <i>End Date</i> | <i>For ASH Internal Use</i>                                        |
|----------------|--------------------------------|----------------|-----------------|--------------------------------------------------------------------|
| Alexion        | Warm AIHA                      | Local PI       | Current         | Not related to the guideline topic. Management through disclosure. |
| Novartis       | ITP                            | Local PI       | Current         | Not related to the guideline topic. Management through disclosure. |
| Novo Nordisk   | Hemophilia                     | Local PI       | Current         | Not related to the guideline topic. Management through disclosure. |
| Pfizer         | Hemophilia                     | Local PI       | Current         | Not related to the guideline topic. Management through disclosure. |
| Spark          | Hemophilia                     | Local PI       | Current         | Not related to the guideline topic. Management through disclosure. |

| <i>Company</i> | <i>Description of Research</i> | <i>My Role</i> | <i>End Date</i> | <i>For ASH Internal Use</i>                                        |
|----------------|--------------------------------|----------------|-----------------|--------------------------------------------------------------------|
| Takeda         | TTP                            | Local PI       | Current         | Not related to the guideline topic. Management through disclosure. |
|                |                                |                |                 |                                                                    |
|                |                                |                |                 |                                                                    |
|                |                                |                |                 |                                                                    |

Paid and Volunteer Activities for Organizations Supported by For-Profit Healthcare Companies

2. Do you currently or in the past 24 months have you been involved in any volunteer or paid work for an organization that is wholly or partially funded by any **for-profit healthcare company**?

No

Yes, as described below:

Column 1 Name the organization. If known to you, describe any industry funding or support.

Column 2 Briefly describe your activity and role, e.g., employment, service on board of directors, other volunteer services.

Column 3 Indicate if your activity was paid or volunteered.

Column 4 Indicate when your involvement with the organization ended. (If your involvement has not yet ended, indicate “current” or “ongoing.”)

Add rows as needed for each organization.

| <i>Organization</i> | <i>Description and role</i> | <i>Paid or Unpaid?</i> | <i>End Date</i> | <i>For ASH Internal Use</i> |
|---------------------|-----------------------------|------------------------|-----------------|-----------------------------|
|                     |                             |                        |                 |                             |
|                     |                             |                        |                 |                             |
|                     |                             |                        |                 |                             |

Other Relevant Indirect Financial Interests

3. Do you have other **indirect financial interests** with any: (i) **for-profit healthcare** company; or (ii) other institution, organization, entity or individual that could be relevant to the work of developing these guidelines?

No

Yes

If yes, please explain:



## Part C. Relevant Other Interests That Are Not Mainly Financial

### Personal Beliefs

1. Do you have strongly held beliefs related to the topic of these guidelines?

No

Yes

If yes, please explain:

### Previously Published Opinions

2. Have you ever authored, coauthored, or publicly provided an opinion related to the topic of these guidelines, e.g., a clinical practice guideline, textbook, review article, meeting poster or presentation, grand rounds talk, letter to the editor?

No

Yes

If yes, what were those views and where were they made?

Multiple views as expressed in (1) PMID 32440883 and (2) Cuker & Pevandi, UpToDate, "Coronavirus Disease 2019 (COVID-19):Hypercoagulability"

### Non-Industry Supported Research

3. Currently or in the past 24 months, have you been involved in a leadership role in any research project not already reported under Part B, Question 1, relevant to the topic of these guidelines, e.g., a research project funded by a nonprofit or governmental organization?

No

Yes, as described below:

Column 1 Name the entity funding the research.

Column 2 Describe the research project.

Column 3 Describe your role: (a) national or overall principal investigator, (b) member of a steering committee of a study that does not have a principal investigator, (c) site or local investigator. If other than these options, please describe.

Column 4 Indicate when your involvement ended, if applicable. (If your involvement has not yet ended, indicate "current" or "ongoing.")

Add rows as needed for each research project.

| <i>Funder</i> | <i>Description of Research</i> | <i>My Role</i> | <i>End Date</i> |
|---------------|--------------------------------|----------------|-----------------|
|               |                                |                |                 |
|               |                                |                |                 |
|               |                                |                |                 |
|               |                                |                |                 |

### Institutional Relationships

4. Could your compensation be affected by recommendations on this topic?

Don't know

No

Yes

If yes, please explain:

5. Do you generate revenues for your institution or employer by clinical activity, teaching, speaking, consulting, testifying, writing, or otherwise sharing your knowledge or opinions about this guideline topic?

Don't know

No

Yes

If yes, please explain:

I see patients with COVID-19-associated thrombosis and my institution bills for these visits.

6. Could your institution benefit or be harmed by guidelines on this topic?

Don't know

No

Yes

If yes, please explain:



Career Advancement

7. How would you characterize the support you would receive from your primary mentor, institution, or other entities if your work on this panel or authorship of these guidelines generated a strong reaction from peers outside your institution?

I am confident that I would be supported my institution regarding these guidelines as long as they were developed within the confines of academic integrity irrespective of their content or the reaction they receive.

Involvement in Organizations With Relevant Policies, Positions, or Guidelines

8. Are you involved as an employee, volunteer, or member of any organization that has published or to your knowledge is currently developing policies, positions, or guidelines relevant to these ASH guidelines, e.g., clinical practice guidelines, appropriate use criteria, expert consensus statement, mission statement, advocacy statement, amicus brief, or legislature or legal testimony?

No

Yes, as described below:

Column 1 Name the organization.

Column 2 Describe or reference the relevant policy, position, or guidelines.

Column 3 Describe your role with the organization, including your involvement in developing, disseminating, or implementing the relevant policy, position, or guidelines.

Add rows as needed for each organization.

| <i>Organization</i> | <i>Relevant Policy Position</i> | <i>Your Role</i> |
|---------------------|---------------------------------|------------------|
| AC Forum            | See PMID 32440883*              | Co-author        |
|                     |                                 |                  |
|                     |                                 |                  |
|                     |                                 |                  |

Clinical Practice

9. Do you see patients clinically?

No

Yes

If yes, what is your primary specialty or subspecialty?

Hematology, hemostasis and thrombosis

If yes, do you prescribe or otherwise recommend clinical interventions (e.g., screening or diagnostic tests, evaluations, treatments, procedures) that may be addressed by these guidelines?

No

Yes

If yes, please explain:

I participate in the care of patients with suspected and confirmed COVID-19-associated thrombosis.

#### Other

10. Do you have other nonfinancial interests or relationships not described above that could be relevant to the work of developing these guidelines?

No

Yes

If yes, please describe:

I serve as a paid consultant for Synergy CRO, a clinical research organization that specializes in safety monitoring and pharmacovigilance for clinical trials. I do not consider this a direct conflict because the company does not develop, produce, market, or distribute drugs, devices, services, or therapies used to diagnose, treat, monitor, manage, or alleviate health conditions.

#### Expected Interests

11. Do you expect to enter into, within the next 24 months, any new **financial or nonfinancial interests** not described above that could be relevant to the work of developing these guidelines?

No

Yes

If yes, please describe:

## Section 2. Attestation of Compliance With Conflict of Interest Policies

In consideration of my participation on these guidelines, I hereby certify and agree that:

| <i>Policy</i>                                                                                                                                                                                                                                                                                                                                                                                                                                                                                                                                                                                                                                                                                                                                                                                                                                                                                                                                                                                                                                                                                                                                                                                                             | <i>Initials</i> |
|---------------------------------------------------------------------------------------------------------------------------------------------------------------------------------------------------------------------------------------------------------------------------------------------------------------------------------------------------------------------------------------------------------------------------------------------------------------------------------------------------------------------------------------------------------------------------------------------------------------------------------------------------------------------------------------------------------------------------------------------------------------------------------------------------------------------------------------------------------------------------------------------------------------------------------------------------------------------------------------------------------------------------------------------------------------------------------------------------------------------------------------------------------------------------------------------------------------------------|-----------------|
| I have reviewed and understand the ASH Principles and Policies on Conflict of Interest published on the ASH website at <a href="https://www.hematology.org/about/governance/conflict-of-interest">https://www.hematology.org/about/governance/conflict-of-interest</a> including the special Policy on Management of Conflicts in the Development of Clinical Practice Guidelines (“ASH Policy”).                                                                                                                                                                                                                                                                                                                                                                                                                                                                                                                                                                                                                                                                                                                                                                                                                         | ACC             |
| I have disclosed and will continue to disclose completely all potential conflicts of interest for myself and for my partner or spouse, to the best of my ability and knowledge, in accordance with ASH Policy and this Disclosure Form.                                                                                                                                                                                                                                                                                                                                                                                                                                                                                                                                                                                                                                                                                                                                                                                                                                                                                                                                                                                   | ACC             |
| To ensure completeness and avoid discrepancies, I have checked and periodically will check my financial disclosures against other published information, including from the U.S. Centers for Medicare and Medicaid Services’ Open Payments database (or similar non-U.S. database) and explain any discrepant information.                                                                                                                                                                                                                                                                                                                                                                                                                                                                                                                                                                                                                                                                                                                                                                                                                                                                                                | ACC             |
| <p>Until submission of the guidelines for publication, I understand and agree that without special exception from ASH, any of the following will disqualify me from continued participation and I will not enter into:</p> <ul style="list-style-type: none"> <li>• Any <b>direct financial interest</b> of myself or my partner or spouse in any <b>for-profit healthcare company or companies</b>, if such interests in aggregate may be reasonably valued to be &gt;\$5,000/year, regardless of relevance to the guidelines</li> <li>• Any noneducational speaking by myself on behalf of any <b>for-profit healthcare company</b> (e.g., service on a company “speakers bureau”), regardless of relevance to the guidelines</li> <li>• Consulting or advising about the marketing of products by any <b>for-profit healthcare company</b> (e.g., service on a company “advisory board”), regardless of relevance to the guidelines</li> <li>• Simultaneous participation on guidelines by another organization on the same topic</li> <li>• Any <i>undisclosed</i> financial interest in any <b>for-profit healthcare company</b> occurring in the 24 months prior to my participation on these guidelines</li> </ul> | ACC             |
| I understand that if a disqualifying interest is reported, the usual course of action will be dismissal from participation and acknowledgment within the guideline publication rather than authorship.                                                                                                                                                                                                                                                                                                                                                                                                                                                                                                                                                                                                                                                                                                                                                                                                                                                                                                                                                                                                                    | ACC             |
| At regular intervals during the guideline development process, as determined by ASH, I will review my information in this Disclosure Form; provide updated disclosures; and, if requested, attest that I do not have any interests that should disqualify my participation.                                                                                                                                                                                                                                                                                                                                                                                                                                                                                                                                                                                                                                                                                                                                                                                                                                                                                                                                               | ACC             |

|                                                                                                                                                                                                                             |     |
|-----------------------------------------------------------------------------------------------------------------------------------------------------------------------------------------------------------------------------|-----|
| I agree to publish with the guidelines my complete disclosures, this agreement, and future attestations.                                                                                                                    | ACC |
| I understand that for 1 year following initial publication of the guidelines, I am encouraged by ASH to avoid new conflicts of interest that could reduce trust in the guidelines, in accordance with my own best judgment. | ACC |

Agreed by

Adam Cuker

Date

June 7, 2020

### Section 3. ASH Review Prior to Participation

For ASH Internal Use Only

| <i>Name, Role</i>                                                      | <i>Date</i>   | <i>Management Notes</i> |
|------------------------------------------------------------------------|---------------|-------------------------|
| Eddrika Russell, ASH Staff                                             | June 11, 2020 |                         |
| Rob Kunkle, ASH Staff                                                  | June 11, 2020 |                         |
| Menaka Pai, MD, ex officio, ASH<br>Guideline Oversight<br>Subcommittee | June 11, 2020 |                         |
|                                                                        |               |                         |
|                                                                        |               |                         |

## Section 4. Disclosures and Attestations During Participation

For ASH Internal Use Only

| <i>Disclosure or attestation</i> | <i>Date</i> | <i>Reviewed by</i>     | <i>Management Notes</i>                                           |
|----------------------------------|-------------|------------------------|-------------------------------------------------------------------|
| Attestation                      | 6/7/2020    | Russell                | No special management considerations.                             |
| Attestation                      | 8/31/2020   | Russell                | No special management considerations.                             |
| Attestation                      | 3/5/2021    | Russell                | No special management considerations.                             |
| Attestation                      | 8/11/2021   | Russell                | No special management considerations.                             |
| Attestation                      | 9/2/2021    | Russell                | No special management considerations.                             |
| Attestation                      | 1/20/2022   | Alexander              | No special management considerations.                             |
|                                  | 3/30/2022   | Deion Smith, ASH Staff | Dr. Cuker confirmed that all information in this form is correct. |

## Section 5. Participation and Recusal History

For ASH Internal Use Only

| <i>Description</i>                                   | <i>End Date</i>    | <i>Participated?</i> |
|------------------------------------------------------|--------------------|----------------------|
| Receive orientation.                                 | June 24, 2020      | Yes                  |
| Prioritize guideline questions.                      | July 8, 2020       | Yes                  |
| Review available evidence                            | September 30, 2020 | Yes                  |
| Form recommendations 1&2                             | October 8, 2020    | Yes                  |
| Review public comments.                              | October 27, 2020   | Yes                  |
| Develop guideline report for publication.            | October 27, 2020   | Yes                  |
| Review available evidence + form recommendation 1A   | April 7, 2021      | Yes                  |
| Develop guideline report for publication (1A)        | June 4, 2021       | Yes                  |
| Review available evidence + form recommendation 3    | April 14, 2021     | Yes                  |
| Develop guideline report for publication (3)         | August 13, 2021    | Yes                  |
| Review available evidence (2B)                       | November 9, 2021   | Yes                  |
| Update recommendation 2B                             | November 17, 2021  | Yes                  |
| Develop guideline report for publication (2B)        | January 31, 2022   | Yes                  |
| Review available evidence + update recommendation 1B | January 27, 2022   | Yes                  |
| Develop guideline report for publication (1B)        |                    |                      |
| Review available evidence + update recommendation 3  | March 3, 2022      | Yes                  |
|                                                      |                    |                      |
|                                                      |                    |                      |

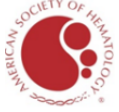

ASH Clinical Practice Guidelines  
Participant Information

---

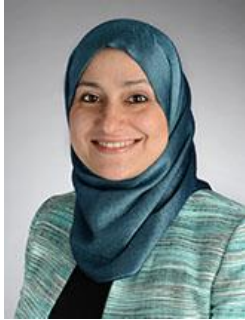

Reem Mustafa, MBBS, PhD, MPH

Associate Professor, Department of Internal Medicine, Division of Nephrology  
and Hypertension

University of Kansas

Kansas City, KS, United States

---

**Project**

ASH Clinical Practice Guidelines on Anticoagulation in Patients With COVID-19

**Role**

Methodology co-chair of the guideline panel; member (unpaid) of the methods team

**Profile**

Dr. Mustafa is a nephrologist and methodologist at the University of Kansas. She cares for patients with COVID-19, and was involved in the development of the Infectious Disease Society of America's COVID-19 guidelines. She brings methodologic expertise and deep experience with GRADE to these guidelines.

[June 17, 2020 profile approved by Dr. Mustafa]



## Section 1. Disclosures Prior to Participation

### Definitions

|                                             |                                                                                                                                                                                                                                                                                                                                                                                                                                                                                                                                                                                                                                                             |
|---------------------------------------------|-------------------------------------------------------------------------------------------------------------------------------------------------------------------------------------------------------------------------------------------------------------------------------------------------------------------------------------------------------------------------------------------------------------------------------------------------------------------------------------------------------------------------------------------------------------------------------------------------------------------------------------------------------------|
| <b><i>Conflict of interest</i></b>          | A situation in which a reasonable person would consider that an individual’s judgments or actions regarding any aspect of the guideline development process is, or could be perceived to be, influenced by an outside interest                                                                                                                                                                                                                                                                                                                                                                                                                              |
| <b><i>Financial interest</i></b>            | A position or relationship held by an individual that offers potential gain or loss of monetary value, such as employment, stock ownership, payment for services, or gifts given with the expectation of reciprocity                                                                                                                                                                                                                                                                                                                                                                                                                                        |
| <b><i>Direct financial interest</i></b>     | A financial interest that is owned by the individual or received directly by the individual                                                                                                                                                                                                                                                                                                                                                                                                                                                                                                                                                                 |
| <b><i>Indirect financial interest</i></b>   | A financial interest that is owned or received via an intermediary, e.g., research funding to an individual received through the individual’s academic institution                                                                                                                                                                                                                                                                                                                                                                                                                                                                                          |
| <b><i>For-profit healthcare company</i></b> | “A for-profit entity that develops, produces, markets, or distributes drugs, devices, services, or therapies used to diagnose, treat, monitor, manage, and alleviate health conditions. This definition is not intended to include non-profit entities, entities outside of the healthcare sector, or entities through which physicians provide clinical services directly to patients” (Council of Medical Specialty Societies’ “Code for Interactions With Industry” 2015). This definition is furthermore not viewed by ASH to include companies that provide accredited continuing medical education or that publish scientific or educational content. |

### Part A. Direct Financial Interests

#### Employment With For-Profit Healthcare Companies

1. Are you currently or in the past 24 months have you been an employee of any **for-profit healthcare company**?

No

Yes, as described below:

Add rows as needed for each employment relationship.

| <i>Company</i> | <i>Description</i> | <i>End Date</i> | <i>For ASH Internal Use</i> |
|----------------|--------------------|-----------------|-----------------------------|
|                |                    |                 |                             |
|                |                    |                 |                             |

| <i>Company</i> | <i>Description</i> | <i>End Date</i> | <i>For ASH Internal Use</i> |
|----------------|--------------------|-----------------|-----------------------------|
|                |                    |                 |                             |
|                |                    |                 |                             |

Equity in For-Profit Healthcare Companies

2. Do you currently or in the past 24 months have you had equity in any **for-profit healthcare company**? Equity includes stock, stock options, and other ownership interests but excludes diversified mutual fund shares.

No

Yes, as described below:

Add rows as needed for each equity interest.

| <i>Company</i> | <i>Description</i> | <i>Date Divested</i> | <i>For ASH Internal Use</i> |
|----------------|--------------------|----------------------|-----------------------------|
|                |                    |                      |                             |
|                |                    |                      |                             |
|                |                    |                      |                             |
|                |                    |                      |                             |

Healthcare-Related Patents, Royalties, and Other Intellectual Property

3. Do you currently or in the past 24 months have you owned patents for or received royalties from any intellectual property or product used to diagnose, treat, monitor, manage, or alleviate health conditions?

No

Yes, as described below:

Add rows as needed for each patent or royalty interest.

| <i>Company</i> | <i>Description</i> | <i>Date Divested</i> | <i>For ASH Internal Use</i> |
|----------------|--------------------|----------------------|-----------------------------|
|                |                    |                      |                             |
|                |                    |                      |                             |
|                |                    |                      |                             |
|                |                    |                      |                             |

Personal Income or Other Direct Transfers of Value From For-Profit Healthcare Companies

4. Do you currently or in the past 24 months have you received any personal income or other direct transfers of value (e.g., honoraria, gifts, travel support, meeting registration, meals) from any **for-profit healthcare company**?

No

Yes, as described below:

Column 1 Name the company.

Column 2 Describe the activity for which you received the income or other transfer of value, e.g., research, consultancy, speakers bureau involvement, service on an advisory committee or board, expert testimony.

Column 3 Indicate when the activity ended, if applicable. (If the activity has not yet ended, indicate “current” or “ongoing.”)

Add rows as needed for each activity.

| <i>Company</i> | <i>Description</i> | <i>End Date</i> | <i>For ASH Internal Use</i> |
|----------------|--------------------|-----------------|-----------------------------|
|                |                    |                 |                             |
|                |                    |                 |                             |
|                |                    |                 |                             |
|                |                    |                 |                             |
|                |                    |                 |                             |
|                |                    |                 |                             |
|                |                    |                 |                             |
|                |                    |                 |                             |

My Partner’s or Spouse’s Interests

5. Currently or in the past 24 months has *your partner or spouse* had any of the interests or relationships described in questions 1-4?

No

Yes, as described below:

Add rows as needed for each interest.

| <i>Company</i> | <i>Description</i> | <i>End Date</i> | <i>For ASH Internal Use</i> |
|----------------|--------------------|-----------------|-----------------------------|
|                |                    |                 |                             |

| <i>Company</i> | <i>Description</i> | <i>End Date</i> | <i>For ASH Internal Use</i> |
|----------------|--------------------|-----------------|-----------------------------|
|                |                    |                 |                             |
|                |                    |                 |                             |

Other Relevant Direct Financial Interests

6. Do you have other current or recent (within the past 24 months) **direct financial interests** with any institution, organization, entity or individual that could be relevant to the work of developing these guidelines?

No

Yes

If yes, please explain:



Paid and Volunteer Activities for Organizations Supported by For-Profit Healthcare Companies

2. Do you currently or in the past 24 months have you been involved in any volunteer or paid work for an organization that is wholly or partially funded by any **for-profit healthcare company**?

No

Yes, as described below:

Column 1 Name the organization. If known to you, describe any industry funding or support.

Column 2 Briefly describe your activity and role, e.g., employment, service on board of directors, other volunteer services.

Column 3 Indicate if your activity was paid or volunteered.

Column 4 Indicate when your involvement with the organization ended. (If your involvement has not yet ended, indicate “current” or “ongoing.”)

Add rows as needed for each organization.

| <i>Organization</i> | <i>Description and role</i> | <i>Paid or Unpaid?</i> | <i>End Date</i> | <i>For ASH Internal Use</i> |
|---------------------|-----------------------------|------------------------|-----------------|-----------------------------|
|                     |                             |                        |                 |                             |
|                     |                             |                        |                 |                             |
|                     |                             |                        |                 |                             |

Other Relevant Indirect Financial Interests

3. Do you have other **indirect financial interests** with any: (i) **for-profit healthcare** company; or (ii) other institution, organization, entity or individual that could be relevant to the work of developing these guidelines?

No

Yes

If yes, please explain:

## Part C. Relevant Other Interests That Are Not Mainly Financial

### Personal Beliefs

1. Do you have strongly held beliefs related to the topic of these guidelines?

No

Yes

If yes, please explain:

### Previously Published Opinions

2. Have you ever authored, coauthored, or publicly provided an opinion related to the topic of these guidelines, e.g., a clinical practice guideline, textbook, review article, meeting poster or presentation, grand rounds talk, letter to the editor?

No. *I have published guidelines about COVID-19 but none address the question about anticoagulation.*

Yes

If yes, what were those views and where were they made?

### Non-Industry Supported Research

3. Currently or in the past 24 months, have you been involved in a leadership role in any research project not already reported under Part B, Question 1, relevant to the topic of these guidelines, e.g., a research project funded by a nonprofit or governmental organization?

No

Yes, as described below:

Column 1 Name the entity funding the research.

Column 2 Describe the research project.

Column 3 Describe your role: (a) national or overall principal investigator, (b) member of a steering committee of a study that does not have a principal investigator, (c) site or local investigator. If other than these options, please describe.

Column 4 Indicate when your involvement ended, if applicable. (If your involvement has not yet ended, indicate "current" or "ongoing.")

Add rows as needed for each research project.

| <i>Funder</i> | <i>Description of Research</i> | <i>My Role</i> | <i>End Date</i> |
|---------------|--------------------------------|----------------|-----------------|
|               |                                |                |                 |

| <i>Funder</i> | <i>Description of Research</i> | <i>My Role</i> | <i>End Date</i> |
|---------------|--------------------------------|----------------|-----------------|
|               |                                |                |                 |
|               |                                |                |                 |
|               |                                |                |                 |

### Institutional Relationships

4. Could your compensation be affected by recommendations on this topic?

Don't know

No

Yes

If yes, please explain:

5. Do you generate revenues for your institution or employer by clinical activity, teaching, speaking, consulting, testifying, writing, or otherwise sharing your knowledge or opinions about this guideline topic?

Don't know

No

Yes

If yes, please explain:

6. Could your institution benefit or be harmed by guidelines on this topic?

Don't know

No

Yes

If yes, please explain:

### Career Advancement

7. How would you characterize the support you would receive from your primary mentor, institution, or other entities if your work on this panel or authorship of these guidelines generated a strong reaction from peers outside your institution?



RM: They will likely support me.

**Involvement in Organizations With Relevant Policies, Positions, or Guidelines**

8. Are you involved as an employee, volunteer, or member of any organization that has published or to your knowledge is currently developing policies, positions, or guidelines relevant to these ASH guidelines, e.g., clinical practice guidelines, appropriate use criteria, expert consensus statement, mission statement, advocacy statement, amicus brief, or legislature or legal testimony?

No

Yes, as described below:

Column 1 Name the organization.

Column 2 Describe or reference the relevant policy, position, or guidelines.

Column 3 Describe your role with the organization, including your involvement in developing, disseminating, or implementing the relevant policy, position, or guidelines.

Add rows as needed for each organization.

| <i>Organization</i> | <i>Relevant Policy Position</i> | <i>Your Role</i> |
|---------------------|---------------------------------|------------------|
|                     |                                 |                  |
|                     |                                 |                  |
|                     |                                 |                  |
|                     |                                 |                  |

**Clinical Practice**

9. Do you see patients clinically?

No

Yes

If yes, what is your primary specialty or subspecialty?

Nephrology

If yes, do you prescribe or otherwise recommend clinical interventions (e.g., screening or diagnostic tests, evaluations, treatments, procedures) that may be addressed by these guidelines?

No

Yes

If yes, please explain:

I have seen and continue to care for patients with COVID19 admitted to the hospital and in the ICU.

#### Other

10. Do you have other nonfinancial interests or relationships not described above that could be relevant to the work of developing these guidelines?

No

Yes

If yes, please describe:

#### Expected Interests

11. Do you expect to enter into, within the next 24 months, any new **financial or nonfinancial interests** not described above that could be relevant to the work of developing these guidelines?

No

Yes

If yes, please describe:

## Section 2. Attestation of Compliance With Conflict of Interest Policies

In consideration of my participation on these guidelines, I hereby certify and agree that:

| <i>Policy</i>                                                                                                                                                                                                                                                                                                                                                                                                                                                                                                                                                                                                                                                                                                                                                                                                                                                                                                                                                                                                                                                                                                                                                                                                             | <i>Initials</i> |
|---------------------------------------------------------------------------------------------------------------------------------------------------------------------------------------------------------------------------------------------------------------------------------------------------------------------------------------------------------------------------------------------------------------------------------------------------------------------------------------------------------------------------------------------------------------------------------------------------------------------------------------------------------------------------------------------------------------------------------------------------------------------------------------------------------------------------------------------------------------------------------------------------------------------------------------------------------------------------------------------------------------------------------------------------------------------------------------------------------------------------------------------------------------------------------------------------------------------------|-----------------|
| I have reviewed and understand the ASH Principles and Policies on Conflict of Interest published on the ASH website at <a href="https://www.hematology.org/about/governance/conflict-of-interest">https://www.hematology.org/about/governance/conflict-of-interest</a> including the special Policy on Management of Conflicts in the Development of Clinical Practice Guidelines (“ASH Policy”).                                                                                                                                                                                                                                                                                                                                                                                                                                                                                                                                                                                                                                                                                                                                                                                                                         | RM              |
| I have disclosed and will continue to disclose completely all potential conflicts of interest for myself and for my partner or spouse, to the best of my ability and knowledge, in accordance with ASH Policy and this Disclosure Form.                                                                                                                                                                                                                                                                                                                                                                                                                                                                                                                                                                                                                                                                                                                                                                                                                                                                                                                                                                                   | RM              |
| To ensure completeness and avoid discrepancies, I have checked and periodically will check my financial disclosures against other published information, including from the U.S. Centers for Medicare and Medicaid Services’ Open Payments database (or similar non-U.S. database) and explain any discrepant information.                                                                                                                                                                                                                                                                                                                                                                                                                                                                                                                                                                                                                                                                                                                                                                                                                                                                                                | RM              |
| <p>Until submission of the guidelines for publication, I understand and agree that without special exception from ASH, any of the following will disqualify me from continued participation and I will not enter into:</p> <ul style="list-style-type: none"> <li>• Any <b>direct financial interest</b> of myself or my partner or spouse in any <b>for-profit healthcare company or companies</b>, if such interests in aggregate may be reasonably valued to be &gt;\$5,000/year, regardless of relevance to the guidelines</li> <li>• Any noneducational speaking by myself on behalf of any <b>for-profit healthcare company</b> (e.g., service on a company “speakers bureau”), regardless of relevance to the guidelines</li> <li>• Consulting or advising about the marketing of products by any <b>for-profit healthcare company</b> (e.g., service on a company “advisory board”), regardless of relevance to the guidelines</li> <li>• Simultaneous participation on guidelines by another organization on the same topic</li> <li>• Any <i>undisclosed</i> financial interest in any <b>for-profit healthcare company</b> occurring in the 24 months prior to my participation on these guidelines</li> </ul> | RM              |
| I understand that if a disqualifying interest is reported, the usual course of action will be dismissal from participation and acknowledgment within the guideline publication rather than authorship.                                                                                                                                                                                                                                                                                                                                                                                                                                                                                                                                                                                                                                                                                                                                                                                                                                                                                                                                                                                                                    | RM              |
| At regular intervals during the guideline development process, as determined by ASH, I will review my information in this Disclosure Form; provide updated disclosures; and, if requested, attest that I do not have any interests that should disqualify my participation.                                                                                                                                                                                                                                                                                                                                                                                                                                                                                                                                                                                                                                                                                                                                                                                                                                                                                                                                               | RM              |

| <i>Policy</i>                                                                                                                                                                                                               | <i>Initials</i> |
|-----------------------------------------------------------------------------------------------------------------------------------------------------------------------------------------------------------------------------|-----------------|
| I agree to publish with the guidelines my complete disclosures, this agreement, and future attestations.                                                                                                                    | RM              |
| I understand that for 1 year following initial publication of the guidelines, I am encouraged by ASH to avoid new conflicts of interest that could reduce trust in the guidelines, in accordance with my own best judgment. | RM              |

Agreed by

Reem Mustafa

Date

June 7, 2020

### Section 3. ASH Review Prior to Participation

For ASH Internal Use Only

| <i>Name, Role</i>                               | <i>Date</i> | <i>Management Notes</i> |
|-------------------------------------------------|-------------|-------------------------|
| Eddrika Russell, ASH Staff                      | 6/11/2020   |                         |
| Rob Kunkle, ASH Staff                           | 6/11/2020   |                         |
| Menaka Pai, MD Guideline Oversight Subcommittee | 6/11/2020   | Participation approved  |
|                                                 |             |                         |
|                                                 |             |                         |
|                                                 |             |                         |

## Section 4. Disclosures and Attestations During Participation

For ASH Internal Use Only

| <i>Disclosure or attestation</i> | <i>Date</i> | <i>Reviewed by</i>        | <i>Management Notes</i>                                             |
|----------------------------------|-------------|---------------------------|---------------------------------------------------------------------|
| Attestation                      | 6/7/2020    | Russell, Kunkle           | Dr. Mustafa agreed to adhere to the policies described herein.      |
| Attestation                      | 9/14/2020   | Russell                   | Dr. Mustafa agreed to adhere to the policies described herein.      |
| Attestation                      | 3/5/2021    | Russell                   | Dr. Mustafa agreed to adhere to the policies described herein.      |
| Attestation                      | 8/16/2021   | Russell                   | Dr. Mustafa agreed to adhere to the policies described herein.      |
| Attestation                      | 9/14/2021   | Russell                   | Dr. Mustafa agreed to adhere to the policies described herein.      |
| Attestation                      | 1/24/2022   | Alexander                 | Dr. Mustafa agreed to adhere to the policies described herein.      |
|                                  | 4/1/2022    | Deion Smith,<br>ASH Staff | Dr. Mustafa confirmed that all information in this form is correct. |

## Section 5. Participation and Recusal History

For ASH Internal Use Only

| <i>Description</i>                                   | <i>End Date</i>    | <i>Participated?</i> |
|------------------------------------------------------|--------------------|----------------------|
| Receive orientation.                                 | June 24, 2020      | Yes                  |
| Prioritize guideline questions.                      | July 8, 2020       | Yes                  |
| Review available evidence                            | September 30, 2020 | Yes                  |
| Form recommendations 1&2                             | October 8, 2020    | Yes                  |
| Review public comments.                              | October 27, 2020   | Yes                  |
| Develop guideline report for publication.            | October 27, 2020   | Yes                  |
| Review available evidence + form recommendation 1A   | April 7, 2021      | Yes                  |
| Develop guideline report for publication (1A)        | June 4, 2021       | Yes                  |
| Review available evidence + form recommendation 3    | April 14, 2021     | Yes                  |
| Develop guideline report for publication (3)         | August 13, 2021    | Yes                  |
| Review available evidence (2B)                       | November 9, 2021   | Yes                  |
| Update recommendation 2B                             | November 17, 2021  | Yes                  |
| Develop guideline report for publication (2B)        | January 31, 2022   | Yes                  |
| Review available evidence + update recommendation 1B | January 27, 2022   | Yes                  |
| Develop guideline report for publication (1B)        |                    |                      |
| Review available evidence + update recommendation 3  | March 3, 2022      | Yes                  |

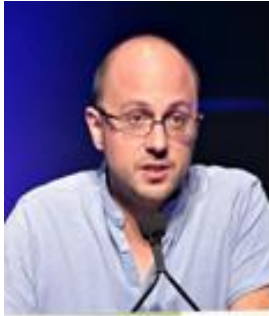

## Ignacio Neumann, MD, PhD

Assistant Professor

Pontificia Universidad Católica de Chile

Santiago, Chile

---

### Project

ASH Clinical Practice Guidelines on Anticoagulation in Patients With COVID-19

### Role

Member of guideline panel; member (unpaid) of the methods team

### Profile

Dr. Neumann is an internist and methodologist at the Pontificia Universidad Católica de Chile. He cares for patients with COVID-19. He brings methodologic expertise, deep experience with GRADE, and a Latin American perspective to these guidelines.

[June 16, 2020 profile approved by Dr. Neumann]



## Section 1. Disclosures Prior to Participation

### Definitions

**Conflict of interest**

A situation in which a reasonable person would consider that an individual’s judgments or actions regarding any aspect of the guideline development process is, or could be perceived to be, influenced by an outside interest

**Financial interest**

A position or relationship held by an individual that offers potential gain or loss of monetary value, such as employment, stock ownership, payment for services, or gifts given with the expectation of reciprocity

**Direct financial interest**

A financial interest that is owned by the individual or received directly by the individual

**Indirect financial interest**

A financial interest that is owned or received via an intermediary, e.g., research funding to an individual received through the individual’s academic institution

**For-profit healthcare company**

“A for-profit entity that develops, produces, markets, or distributes drugs, devices, services, or therapies used to diagnose, treat, monitor, manage, and alleviate health conditions. This definition is not intended to include non-profit entities, entities outside of the healthcare sector, or entities through which physicians provide clinical services directly to patients” (Council of Medical Specialty Societies’ “Code for Interactions With Industry” 2015). This definition is furthermore not viewed by ASH to include companies that provide accredited continuing medical education or that publish scientific or educational content.

### Part A. Direct Financial Interests

#### Employment With For-Profit Healthcare Companies

1. Are you currently or in the past 24 months have you been an employee of any **for-profit healthcare company**?

No

Yes, as described below:

Add rows as needed for each employment relationship.

| <i>Company</i> | <i>Description</i> | <i>End Date</i> | <i>For ASH Internal Use</i> |
|----------------|--------------------|-----------------|-----------------------------|
|                |                    |                 |                             |
|                |                    |                 |                             |

| <i>Company</i> | <i>Description</i> | <i>End Date</i> | <i>For ASH Internal Use</i> |
|----------------|--------------------|-----------------|-----------------------------|
|                |                    |                 |                             |
|                |                    |                 |                             |

Equity in For-Profit Healthcare Companies

2. Do you currently or in the past 24 months have you had equity in any **for-profit healthcare company**? Equity includes stock, stock options, and other ownership interests but excludes diversified mutual fund shares.

No

Yes, as described below:

Add rows as needed for each equity interest.

| <i>Company</i> | <i>Description</i> | <i>Date Divested</i> | <i>For ASH Internal Use</i> |
|----------------|--------------------|----------------------|-----------------------------|
|                |                    |                      |                             |
|                |                    |                      |                             |
|                |                    |                      |                             |
|                |                    |                      |                             |

Healthcare-Related Patents, Royalties, and Other Intellectual Property

3. Do you currently or in the past 24 months have you owned patents for or received royalties from any intellectual property or product used to diagnose, treat, monitor, manage, or alleviate health conditions?

No

Yes, as described below:

Add rows as needed for each patent or royalty interest.

| <i>Company</i> | <i>Description</i> | <i>Date Divested</i> | <i>For ASH Internal Use</i> |
|----------------|--------------------|----------------------|-----------------------------|
|                |                    |                      |                             |
|                |                    |                      |                             |
|                |                    |                      |                             |
|                |                    |                      |                             |

Personal Income or Other Direct Transfers of Value From For-Profit Healthcare Companies

4. Do you currently or in the past 24 months have you received any personal income or other direct transfers of value (e.g., honoraria, gifts, travel support, meeting registration, meals) from any **for-profit healthcare company**?

No

Yes, as described below:

Column 1 Name the company.

Column 2 Describe the activity for which you received the income or other transfer of value, e.g., research, consultancy, speakers bureau involvement, service on an advisory committee or board, expert testimony.

Column 3 Indicate when the activity ended, if applicable. (If the activity has not yet ended, indicate “current” or “ongoing.”)

Add rows as needed for each activity.

| <i>Company</i> | <i>Description</i> | <i>End Date</i> | <i>For ASH Internal Use</i> |
|----------------|--------------------|-----------------|-----------------------------|
|                |                    |                 |                             |
|                |                    |                 |                             |
|                |                    |                 |                             |
|                |                    |                 |                             |
|                |                    |                 |                             |
|                |                    |                 |                             |
|                |                    |                 |                             |
|                |                    |                 |                             |

My Partner’s or Spouse’s Interests

5. Currently or in the past 24 months has *your partner or spouse* had any of the interests or relationships described in questions 1-4?

No

Yes, as described below:

Add rows as needed for each interest.

| <i>Company</i> | <i>Description</i> | <i>End Date</i> | <i>For ASH Internal Use</i> |
|----------------|--------------------|-----------------|-----------------------------|
|                |                    |                 |                             |

| <i>Company</i> | <i>Description</i> | <i>End Date</i> | <i>For ASH Internal Use</i> |
|----------------|--------------------|-----------------|-----------------------------|
|                |                    |                 |                             |
|                |                    |                 |                             |

Other Relevant Direct Financial Interests

6. Do you have other current or recent (within the past 24 months) **direct financial interests** with any institution, organization, entity or individual that could be relevant to the work of developing these guidelines?

No

Yes

If yes, please explain:

## Part B. Indirect Financial Interests

### Institutional Research Funded by For-Profit Healthcare Companies

1. Through your institution, do you currently or in the past 24 months have you been involved in research funded or supported (e.g., in kind support, such as provision of a study drug) by any **for-profit healthcare company**?

No

Yes, as described below:

Column 1 Name the company funding or supporting the research.

Column 2 Briefly describe the research project.

Column 3 Describe your role: (a) national or overall principal investigator, (b) member of a steering committee of a study that does not have a principal investigator, (c) site or local investigator. If other than these options, please describe.

Column 4 Indicate when your involvement ended, if applicable. (If your involvement has not yet ended, indicate “current” or “ongoing.”)

Add rows as needed for each research project.

| <i>Company</i> | <i>Description of Research</i> | <i>My Role</i> | <i>End Date</i> | <i>For ASH Internal Use</i> |
|----------------|--------------------------------|----------------|-----------------|-----------------------------|
|                |                                |                |                 |                             |
|                |                                |                |                 |                             |
|                |                                |                |                 |                             |
|                |                                |                |                 |                             |
|                |                                |                |                 |                             |

### Paid and Volunteer Activities for Organizations Supported by For-Profit Healthcare Companies

2. Do you currently or in the past 24 months have you been involved in any volunteer or paid work for an organization that is wholly or partially funded by any **for-profit healthcare company**?

No

Yes, as described below:

Column 1 Name the organization. If known to you, describe any industry funding or support.

Column 2 Briefly describe your activity and role, e.g., employment, service on board of directors, other volunteer services.

Column 3 Indicate if your activity was paid or volunteered.

Column 4 Indicate when your involvement with the organization ended. (If your involvement has not yet ended, indicate “current” or “ongoing.”)

Add rows as needed for each organization.

| <i>Organization</i> | <i>Description and role</i> | <i>Paid or Unpaid?</i> | <i>End Date</i> | <i>For ASH Internal Use</i> |
|---------------------|-----------------------------|------------------------|-----------------|-----------------------------|
|                     |                             |                        |                 |                             |
|                     |                             |                        |                 |                             |
|                     |                             |                        |                 |                             |

Other Relevant Indirect Financial Interests

3. Do you have other **indirect financial interests** with any: (i) **for-profit healthcare** company; or (ii) other institution, organization, entity or individual that could be relevant to the work of developing these guidelines?

No

Yes

If yes, please explain:

## Part C. Relevant Other Interests That Are Not Mainly Financial

### Personal Beliefs

1. Do you have strongly held beliefs related to the topic of these guidelines?

No

Yes

If yes, please explain:

### Previously Published Opinions

2. Have you ever authored, coauthored, or publicly provided an opinion related to the topic of these guidelines, e.g., a clinical practice guideline, textbook, review article, meeting poster or presentation, grand rounds talk, letter to the editor?

No.

Yes

If yes, what were those views and where were they made?

### Non-Industry Supported Research

3. Currently or in the past 24 months, have you been involved in a leadership role in any research project not already reported under Part B, Question 1, relevant to the topic of these guidelines, e.g., a research project funded by a nonprofit or governmental organization?

No

Yes, as described below:

Column 1 Name the entity funding the research.

Column 2 Describe the research project.

Column 3 Describe your role: (a) national or overall principal investigator, (b) member of a steering committee of a study that does not have a principal investigator, (c) site or local investigator. If other than these options, please describe.

Column 4 Indicate when your involvement ended, if applicable. (If your involvement has not yet ended, indicate "current" or "ongoing.")

Add rows as needed for each research project.

| <i>Funder</i> | <i>Description of Research</i> | <i>My Role</i> | <i>End Date</i> |
|---------------|--------------------------------|----------------|-----------------|
|               |                                |                |                 |
|               |                                |                |                 |

| <i>Funder</i> | <i>Description of Research</i> | <i>My Role</i> | <i>End Date</i> |
|---------------|--------------------------------|----------------|-----------------|
|               |                                |                |                 |
|               |                                |                |                 |

### Institutional Relationships

4. Could your compensation be affected by recommendations on this topic?

Don't know

No

Yes

If yes, please explain:

5. Do you generate revenues for your institution or employer by clinical activity, teaching, speaking, consulting, testifying, writing, or otherwise sharing your knowledge or opinions about this guideline topic?

Don't know

No

Yes

If yes, please explain:

6. Could your institution benefit or be harmed by guidelines on this topic?

Don't know

No

Yes

If yes, please explain:

### Career Advancement

7. How would you characterize the support you would receive from your primary mentor, institution, or other entities if your work on this panel or authorship of these guidelines generated a strong reaction from peers outside your institution?



I would anticipate support from my mentor and colleagues.

**Involvement in Organizations With Relevant Policies, Positions, or Guidelines**

8. Are you involved as an employee, volunteer, or member of any organization that has published or to your knowledge is currently developing policies, positions, or guidelines relevant to these ASH guidelines, e.g., clinical practice guidelines, appropriate use criteria, expert consensus statement, mission statement, advocacy statement, amicus brief, or legislature or legal testimony?

No

Yes, as described below:

Column 1 Name the organization.

Column 2 Describe or reference the relevant policy, position, or guidelines.

Column 3 Describe your role with the organization, including your involvement in developing, disseminating, or implementing the relevant policy, position, or guidelines.

Add rows as needed for each organization.

| <i>Organization</i> | <i>Relevant Policy Position</i> | <i>Your Role</i> |
|---------------------|---------------------------------|------------------|
|                     |                                 |                  |
|                     |                                 |                  |
|                     |                                 |                  |
|                     |                                 |                  |

**Clinical Practice**

9. Do you see patients clinically?

No

Yes

If yes, what is your primary specialty or subspecialty?

Internal Medicine

If yes, do you prescribe or otherwise recommend clinical interventions (e.g., screening or diagnostic tests, evaluations, treatments, procedures) that may be addressed by these guidelines?

No

Yes

If yes, please explain:

I provide care for patients with COVID-19, including diagnosis, prophylaxis and treatment of VTE

#### Other

10. Do you have other nonfinancial interests or relationships not described above that could be relevant to the work of developing these guidelines?

No

Yes

If yes, please describe:

#### Expected Interests

11. Do you expect to enter into, within the next 24 months, any new **financial or nonfinancial interests** not described above that could be relevant to the work of developing these guidelines?

No

Yes

If yes, please describe:

## Section 2. Attestation of Compliance With Conflict of Interest Policies

In consideration of my participation on these guidelines, I hereby certify and agree that:

| <i>Policy</i>                                                                                                                                                                                                                                                                                                                                                                                                                                                                                                                                                                                                                                                                                                                                                                                                                                                                                                                                                                                                                                                                                                                                                                                                             | <i>Initials</i> |
|---------------------------------------------------------------------------------------------------------------------------------------------------------------------------------------------------------------------------------------------------------------------------------------------------------------------------------------------------------------------------------------------------------------------------------------------------------------------------------------------------------------------------------------------------------------------------------------------------------------------------------------------------------------------------------------------------------------------------------------------------------------------------------------------------------------------------------------------------------------------------------------------------------------------------------------------------------------------------------------------------------------------------------------------------------------------------------------------------------------------------------------------------------------------------------------------------------------------------|-----------------|
| I have reviewed and understand the ASH Principles and Policies on Conflict of Interest published on the ASH website at <a href="https://www.hematology.org/about/governance/conflict-of-interest">https://www.hematology.org/about/governance/conflict-of-interest</a> including the special Policy on Management of Conflicts in the Development of Clinical Practice Guidelines (“ASH Policy”).                                                                                                                                                                                                                                                                                                                                                                                                                                                                                                                                                                                                                                                                                                                                                                                                                         | IN              |
| I have disclosed and will continue to disclose completely all potential conflicts of interest for myself and for my partner or spouse, to the best of my ability and knowledge, in accordance with ASH Policy and this Disclosure Form.                                                                                                                                                                                                                                                                                                                                                                                                                                                                                                                                                                                                                                                                                                                                                                                                                                                                                                                                                                                   | IN              |
| To ensure completeness and avoid discrepancies, I have checked and periodically will check my financial disclosures against other published information, including from the U.S. Centers for Medicare and Medicaid Services’ Open Payments database (or similar non-U.S. database) and explain any discrepant information.                                                                                                                                                                                                                                                                                                                                                                                                                                                                                                                                                                                                                                                                                                                                                                                                                                                                                                | IN              |
| <p>Until submission of the guidelines for publication, I understand and agree that without special exception from ASH, any of the following will disqualify me from continued participation and I will not enter into:</p> <ul style="list-style-type: none"> <li>• Any <b>direct financial interest</b> of myself or my partner or spouse in any <b>for-profit healthcare company or companies</b>, if such interests in aggregate may be reasonably valued to be &gt;\$5,000/year, regardless of relevance to the guidelines</li> <li>• Any noneducational speaking by myself on behalf of any <b>for-profit healthcare company</b> (e.g., service on a company “speakers bureau”), regardless of relevance to the guidelines</li> <li>• Consulting or advising about the marketing of products by any <b>for-profit healthcare company</b> (e.g., service on a company “advisory board”), regardless of relevance to the guidelines</li> <li>• Simultaneous participation on guidelines by another organization on the same topic</li> <li>• Any <i>undisclosed</i> financial interest in any <b>for-profit healthcare company</b> occurring in the 24 months prior to my participation on these guidelines</li> </ul> | IN              |
| I understand that if a disqualifying interest is reported, the usual course of action will be dismissal from participation and acknowledgment within the guideline publication rather than authorship.                                                                                                                                                                                                                                                                                                                                                                                                                                                                                                                                                                                                                                                                                                                                                                                                                                                                                                                                                                                                                    | IN              |
| At regular intervals during the guideline development process, as determined by ASH, I will review my information in this Disclosure Form; provide updated disclosures; and, if requested, attest that I do not have any interests that should disqualify my participation.                                                                                                                                                                                                                                                                                                                                                                                                                                                                                                                                                                                                                                                                                                                                                                                                                                                                                                                                               | IN              |

|                                                                                                                                                                                                                             |    |
|-----------------------------------------------------------------------------------------------------------------------------------------------------------------------------------------------------------------------------|----|
| I agree to publish with the guidelines my complete disclosures, this agreement, and future attestations.                                                                                                                    | IN |
| I understand that for 1 year following initial publication of the guidelines, I am encouraged by ASH to avoid new conflicts of interest that could reduce trust in the guidelines, in accordance with my own best judgment. | IN |

Agreed by Ignacio Neumann

Date June 7, 2020

### Section 3. ASH Review Prior to Participation

For ASH Internal Use Only

| <i>Name, Role</i>                                                      | <i>Date</i> | <i>Management Notes</i> |
|------------------------------------------------------------------------|-------------|-------------------------|
| Eddrika Russell, ASH Staff                                             | 6/11/2020   |                         |
| Rob Kunkle, ASH Staff                                                  | 6/11/2020   |                         |
| Menaka Pai, MD, ex officio, ASH<br>Guideline Oversight<br>Subcommittee | 6/11/2020   | Participation approved  |

## Section 4. Disclosures and Attestations During Participation

For ASH Internal Use Only

| <i>Disclosure or attestation</i> | <i>Date</i> | <i>Reviewed by</i>        | <i>Management Notes</i>                                            |
|----------------------------------|-------------|---------------------------|--------------------------------------------------------------------|
| Attestation                      | 6/7/2020    | Russell, Kunkle           | Dr. Neumann agreed to adhere to the policies described herein.     |
| Attestation                      | 9/4/2020    | Russell                   | Dr. Neumann agreed to adhere to the policies described herein.     |
| Attestation                      | 3/30/2021   | Russell                   | Dr. Neumann agreed to adhere to the policies described herein.     |
| Attestation                      | 8/17/2021   | Russell                   | Dr. Neumann agreed to adhere to the policies described herein.     |
| Attestation                      | 9/15/2021   | Russell                   | Dr. Neumann agreed to adhere to the policies described herein.     |
| Attestation                      | 1/31/2022   | Alexander                 | Dr. Neumann agreed to adhere to the policies described herein.     |
|                                  | 4/6/2022    | Deion Smith,<br>ASH Staff | Dr. Neumann confirmed that all information in the form is correct. |

## Section 5. Participation and Recusal History

For ASH Internal Use Only

| <i>Description</i>                                   | <i>End Date</i>    | <i>Participated?</i> |
|------------------------------------------------------|--------------------|----------------------|
| Receive orientation.                                 | June 24, 2020      | Yes                  |
| Prioritize guideline questions.                      | July 8, 2020       | Yes                  |
| Review available evidence                            | September 30, 2020 | Yes                  |
| Form recommendations 1&2                             | October 8, 2020    | Yes                  |
| Review public comments.                              | October 27, 2020   | Yes                  |
| Develop guideline report for publication.            | October 27, 2020   | Yes                  |
| Review available evidence + form recommendation 1A   | April 7, 2021      | Yes                  |
| Develop guideline report for publication (1A)        | June 4, 2021       | Yes                  |
| Review available evidence + form recommendation 3    | April 14, 2021     | Yes                  |
| Develop guideline report for publication (3)         | August 13, 2021    | Yes                  |
| Review available evidence (2B)                       | November 9, 2021   | Yes                  |
| Update recommendation 2B                             | November 17, 2021  | Yes                  |
| Develop guideline report for publication (2B)        | January 31, 2022   | Yes                  |
| Review available evidence + update recommendation 1B | January 27, 2022   | Yes                  |
| Develop guideline report for publication (1B)        |                    |                      |
| Review available evidence + update recommendation 3  | March 3, 2022      | Yes                  |

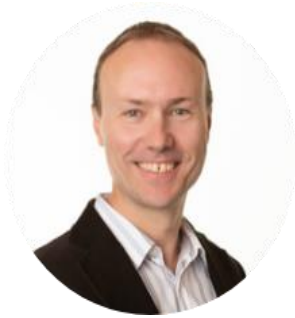

## Robby Nieuwlaat, PhD, MSc

Associate Professor

McMaster University

Hamilton, Ontario, Canada

---

### Project

ASH Clinical Practice Guidelines on Anticoagulation in Patients With COVID-19

### Role

Methods Team Member

Methodology Co-Chair of the Guideline Panel (March 2022 - )

### Profile

Dr. Nieuwlaat is Associate Professor in the Department of Health Research Methods, Evidence and Impact at McMaster University. He is a researcher in the MacGRADE Centre, member of the GRADE Working Group, and member of the Red Hat Group to promote broader uptake of core outcome sets. His research interest and expertise include practice guideline development, systematic reviews, quality of care, and best practice implementation. He has served as a systematic review and guideline development methodologist for multiple guidelines related to venous thromboembolism for the American Society of Hematology, as well as control of out-of-hospital life-threatening bleeding for the International Liaison Committee on Resuscitation. Dr. Nieuwlaat is lead author of a highly cited Cochrane review on adherence to self-administered medications, co-created the CHA<sub>2</sub>DS<sub>2</sub>-VaSc and HAS-BLED risk scores for atrial fibrillation patients, and published multiple papers on quality of care and therapy persistence among cardiovascular disease patients. He published more than 100 peer-reviewed papers with an H-index of 44.

[July 17, 2020 profile approved by Dr. Nieuwlaat]



## Section 1. Disclosures Prior to Participation

### Definitions

**Conflict of interest**

A situation in which a reasonable person would consider that an individual’s judgments or actions regarding any aspect of the guideline development process is, or could be perceived to be, influenced by an outside interest

**Financial interest**

A position or relationship held by an individual that offers potential gain or loss of monetary value, such as employment, stock ownership, payment for services, or gifts given with the expectation of reciprocity

**Direct financial interest**

A financial interest that is owned by the individual or received directly by the individual

**Indirect financial interest**

A financial interest that is owned or received via an intermediary, e.g., research funding to an individual received through the individual’s academic institution

**For-profit healthcare company**

“A for-profit entity that develops, produces, markets, or distributes drugs, devices, services, or therapies used to diagnose, treat, monitor, manage, and alleviate health conditions. This definition is not intended to include non-profit entities, entities outside of the healthcare sector, or entities through which physicians provide clinical services directly to patients” (Council of Medical Specialty Societies’ “Code for Interactions With Industry” 2015). This definition is furthermore not viewed by ASH to include companies that provide accredited continuing medical education or that publish scientific or educational content.

### Part A. Direct Financial Interests

#### Employment With For-Profit Healthcare Companies

1. Are you currently or in the past 24 months have you been an employee of any **for-profit healthcare company**?

No

Yes, as described below:

Add rows as needed for each employment relationship.

| <i>Company</i> | <i>Description</i> | <i>End Date</i> | <i>For ASH Internal Use</i> |
|----------------|--------------------|-----------------|-----------------------------|
|                |                    |                 |                             |
|                |                    |                 |                             |

| <i>Company</i> | <i>Description</i> | <i>End Date</i> | <i>For ASH Internal Use</i> |
|----------------|--------------------|-----------------|-----------------------------|
|                |                    |                 |                             |
|                |                    |                 |                             |

Equity in For-Profit Healthcare Companies

2. Do you currently or in the past 24 months have you had equity in any **for-profit healthcare company**? Equity includes stock, stock options, and other ownership interests but excludes diversified mutual fund shares.

No

Yes, as described below:

Add rows as needed for each equity interest.

| <i>Company</i> | <i>Description</i> | <i>Date Divested</i> | <i>For ASH Internal Use</i> |
|----------------|--------------------|----------------------|-----------------------------|
|                |                    |                      |                             |
|                |                    |                      |                             |
|                |                    |                      |                             |
|                |                    |                      |                             |

Healthcare-Related Patents, Royalties, and Other Intellectual Property

3. Do you currently or in the past 24 months have you owned patents for or received royalties from any intellectual property or product used to diagnose, treat, monitor, manage, or alleviate health conditions?

No

Yes, as described below:

Add rows as needed for each patent or royalty interest.

| <i>Company</i> | <i>Description</i> | <i>Date Divested</i> | <i>For ASH Internal Use</i> |
|----------------|--------------------|----------------------|-----------------------------|
|                |                    |                      |                             |
|                |                    |                      |                             |
|                |                    |                      |                             |
|                |                    |                      |                             |

Personal Income or Other Direct Transfers of Value From For-Profit Healthcare Companies

4. Do you currently or in the past 24 months have you received any personal income or other direct transfers of value (e.g., honoraria, gifts, travel support, meeting registration, meals) from any **for-profit healthcare company**?

No

Yes, as described below:

Column 1 Name the company.

Column 2 Describe the activity for which you received the income or other transfer of value, e.g., research, consultancy, speakers bureau involvement, service on an advisory committee or board, expert testimony.

Column 3 Indicate when the activity ended, if applicable. (If the activity has not yet ended, indicate “current” or “ongoing.”)

Add rows as needed for each activity.

| <i>Company</i> | <i>Description</i> | <i>End Date</i> | <i>For ASH Internal Use</i> |
|----------------|--------------------|-----------------|-----------------------------|
|                |                    |                 |                             |
|                |                    |                 |                             |
|                |                    |                 |                             |
|                |                    |                 |                             |
|                |                    |                 |                             |

My Partner’s or Spouse’s Interests

5. Currently or in the past 24 months has *your partner or spouse* had any of the interests or relationships described in questions 1-4?

No

Yes, as described below:

Add rows as needed for each interest.

| <i>Company</i> | <i>Description</i> | <i>End Date</i> | <i>For ASH Internal Use</i> |
|----------------|--------------------|-----------------|-----------------------------|
|                |                    |                 |                             |
|                |                    |                 |                             |
|                |                    |                 |                             |

### Other Relevant Direct Financial Interests

6. Do you have other current or recent (within the past 24 months) **direct financial interests** with any institution, organization, entity or individual that could be relevant to the work of developing these guidelines?

No

Yes

If yes, please explain:

## Part B. Indirect Financial Interests

### Institutional Research Funded by For-Profit Healthcare Companies

1. Through your institution, do you currently or in the past 24 months have you been involved in research funded or supported (e.g., in kind support, such as provision of a study drug) by any **for-profit healthcare company**?

No

Yes, as described below:

Column 1 Name the company funding or supporting the research.

Column 2 Briefly describe the research project.

Column 3 Describe your role: (a) national or overall principal investigator, (b) member of a steering committee of a study that does not have a principal investigator, (c) site or local investigator. If other than these options, please describe.

Column 4 Indicate when your involvement ended, if applicable. (If your involvement has not yet ended, indicate “current” or “ongoing.”)

Add rows as needed for each research project.

| <i>Company</i> | <i>Description of Research</i> | <i>My Role</i> | <i>End Date</i> | <i>For ASH Internal Use</i> |
|----------------|--------------------------------|----------------|-----------------|-----------------------------|
|                |                                |                |                 |                             |
|                |                                |                |                 |                             |
|                |                                |                |                 |                             |
|                |                                |                |                 |                             |
|                |                                |                |                 |                             |

### Paid and Volunteer Activities for Organizations Supported by For-Profit Healthcare Companies

2. Do you currently or in the past 24 months have you been involved in any volunteer or paid work for an organization that is wholly or partially funded by any **for-profit healthcare company**?

No

Yes, as described below:

Column 1 Name the organization. If known to you, describe any industry funding or support.

Column 2 Briefly describe your activity and role, e.g., employment, service on board of directors, other volunteer services.

Column 3 Indicate if your activity was paid or volunteered.

Column 4 Indicate when your involvement with the organization ended. (If your involvement has not yet ended, indicate “current” or “ongoing.”)

Add rows as needed for each organization.

| <i>Organization</i> | <i>Description and role</i> | <i>Paid or Unpaid?</i> | <i>End Date</i> | <i>For ASH Internal Use</i> |
|---------------------|-----------------------------|------------------------|-----------------|-----------------------------|
|                     |                             |                        |                 |                             |
|                     |                             |                        |                 |                             |
|                     |                             |                        |                 |                             |

Other Relevant Indirect Financial Interests

3. Do you have other **indirect financial interests** with any: (i) **for-profit healthcare** company; or (ii) other institution, organization, entity or individual that could be relevant to the work of developing these guidelines?

No

Yes

If yes, please explain:

## Part C. Relevant Other Interests That Are Not Mainly Financial

### Personal Beliefs

1. Do you have strongly held beliefs related to the topic of these guidelines?

No

Yes

If yes, please explain:

### Previously Published Opinions

2. Have you ever authored, coauthored, or publicly provided an opinion related to the topic of these guidelines, e.g., a clinical practice guideline, textbook, review article, meeting poster or presentation, grand rounds talk, letter to the editor?

No.

Yes

If yes, what were those views and where were they made?

### Non-Industry Supported Research

3. Currently or in the past 24 months, have you been involved in a leadership role in any research project not already reported under Part B, Question 1, relevant to the topic of these guidelines, e.g., a research project funded by a nonprofit or governmental organization?

No

Yes, as described below:

Column 1 Name the entity funding the research.

Column 2 Describe the research project.

Column 3 Describe your role: (a) national or overall principal investigator, (b) member of a steering committee of a study that does not have a principal investigator, (c) site or local investigator. If other than these options, please describe.

Column 4 Indicate when your involvement ended, if applicable. (If your involvement has not yet ended, indicate "current" or "ongoing.")

Add rows as needed for each research project.

| <i>Funder</i> | <i>Description of Research</i> | <i>My Role</i>                                       | <i>End Date</i>                         |
|---------------|--------------------------------|------------------------------------------------------|-----------------------------------------|
| ASH           | VTE guidelines                 | Systematic review team lead                          | Ongoing, expected end date January 2021 |
| ASH           | VTE guidelines                 | Panel member – Optimal Management of Anticoagulation | November 2018                           |
|               |                                |                                                      |                                         |
|               |                                |                                                      |                                         |

### Institutional Relationships

4. Could your compensation be affected by recommendations on this topic?

Don't know

No

Yes

If yes, please explain:

5. Do you generate revenues for your institution or employer by clinical activity, teaching, speaking, consulting, testifying, writing, or otherwise sharing your knowledge or opinions about this guideline topic?

Don't know

No

Yes

If yes, please explain:

6. Could your institution benefit or be harmed by guidelines on this topic?

Don't know

No

Yes

If yes, please explain:



Career Advancement

- 7. How would you characterize the support you would receive from your primary mentor, institution, or other entities if your work on this panel or authorship of these guidelines generated a strong reaction from peers outside your institution?

Supportive of the established methodology we use.

Involvement in Organizations With Relevant Policies, Positions, or Guidelines

- 8. Are you involved as an employee, volunteer, or member of any organization that has published or to your knowledge is currently developing policies, positions, or guidelines relevant to these ASH guidelines, e.g., clinical practice guidelines, appropriate use criteria, expert consensus statement, mission statement, advocacy statement, amicus brief, or legislature or legal testimony?

No

Yes, as described below:

Column 1 Name the organization.

Column 2 Describe or reference the relevant policy, position, or guidelines.

Column 3 Describe your role with the organization, including your involvement in developing, disseminating, or implementing the relevant policy, position, or guidelines.

Add rows as needed for each organization.

| <i>Organization</i> | <i>Relevant Policy Position</i> | <i>Your Role</i> |
|---------------------|---------------------------------|------------------|
|                     |                                 |                  |
|                     |                                 |                  |
|                     |                                 |                  |
|                     |                                 |                  |

Clinical Practice

- 9. Do you see patients clinically?

No

Yes

If yes, what is your primary specialty or subspecialty?

If yes, do you prescribe or otherwise recommend clinical interventions (e.g., screening or diagnostic tests, evaluations, treatments, procedures) that may be addressed by these guidelines?

No

Yes

If yes, please explain:

#### Other

10. Do you have other nonfinancial interests or relationships not described above that could be relevant to the work of developing these guidelines?

No

Yes

If yes, please describe:

#### Expected Interests

11. Do you expect to enter into, within the next 24 months, any new **financial or nonfinancial interests** not described above that could be relevant to the work of developing these guidelines?

No

Yes

If yes, please describe:

## Section 2. Attestation of Compliance With Conflict of Interest Policies

In consideration of my participation on these guidelines, I hereby certify and agree that:

| <i>Policy</i>                                                                                                                                                                                                                                                                                                                                                                                                                                                                                                                                                                                                                                                                                                                                                                                                                                                                                                                                                                                                                                                                                                                                                                                                             | <i>Initials</i> |
|---------------------------------------------------------------------------------------------------------------------------------------------------------------------------------------------------------------------------------------------------------------------------------------------------------------------------------------------------------------------------------------------------------------------------------------------------------------------------------------------------------------------------------------------------------------------------------------------------------------------------------------------------------------------------------------------------------------------------------------------------------------------------------------------------------------------------------------------------------------------------------------------------------------------------------------------------------------------------------------------------------------------------------------------------------------------------------------------------------------------------------------------------------------------------------------------------------------------------|-----------------|
| I have reviewed and understand the ASH Principles and Policies on Conflict of Interest published on the ASH website at <a href="https://www.hematology.org/about/governance/conflict-of-interest">https://www.hematology.org/about/governance/conflict-of-interest</a> including the special Policy on Management of Conflicts in the Development of Clinical Practice Guidelines (“ASH Policy”).                                                                                                                                                                                                                                                                                                                                                                                                                                                                                                                                                                                                                                                                                                                                                                                                                         | RN              |
| I have disclosed and will continue to disclose completely all potential conflicts of interest for myself and for my partner or spouse, to the best of my ability and knowledge, in accordance with ASH Policy and this Disclosure Form.                                                                                                                                                                                                                                                                                                                                                                                                                                                                                                                                                                                                                                                                                                                                                                                                                                                                                                                                                                                   | RN              |
| To ensure completeness and avoid discrepancies, I have checked and periodically will check my financial disclosures against other published information, including from the U.S. Centers for Medicare and Medicaid Services’ Open Payments database (or similar non-U.S. database) and explain any discrepant information.                                                                                                                                                                                                                                                                                                                                                                                                                                                                                                                                                                                                                                                                                                                                                                                                                                                                                                | RN              |
| <p>Until submission of the guidelines for publication, I understand and agree that without special exception from ASH, any of the following will disqualify me from continued participation and I will not enter into:</p> <ul style="list-style-type: none"> <li>• Any <b>direct financial interest</b> of myself or my partner or spouse in any <b>for-profit healthcare company or companies</b>, if such interests in aggregate may be reasonably valued to be &gt;\$5,000/year, regardless of relevance to the guidelines</li> <li>• Any noneducational speaking by myself on behalf of any <b>for-profit healthcare company</b> (e.g., service on a company “speakers bureau”), regardless of relevance to the guidelines</li> <li>• Consulting or advising about the marketing of products by any <b>for-profit healthcare company</b> (e.g., service on a company “advisory board”), regardless of relevance to the guidelines</li> <li>• Simultaneous participation on guidelines by another organization on the same topic</li> <li>• Any <i>undisclosed</i> financial interest in any <b>for-profit healthcare company</b> occurring in the 24 months prior to my participation on these guidelines</li> </ul> | RN              |
| I understand that if a disqualifying interest is reported, the usual course of action will be dismissal from participation and acknowledgment within the guideline publication rather than authorship.                                                                                                                                                                                                                                                                                                                                                                                                                                                                                                                                                                                                                                                                                                                                                                                                                                                                                                                                                                                                                    | RN              |
| At regular intervals during the guideline development process, as determined by ASH, I will review my information in this Disclosure Form; provide updated disclosures; and, if requested, attest that I do not have any interests that should disqualify my participation.                                                                                                                                                                                                                                                                                                                                                                                                                                                                                                                                                                                                                                                                                                                                                                                                                                                                                                                                               | RN              |

| <i>Policy</i>                                                                                                                                                                                                               | <i>Initials</i> |
|-----------------------------------------------------------------------------------------------------------------------------------------------------------------------------------------------------------------------------|-----------------|
| I agree to publish with the guidelines my complete disclosures, this agreement, and future attestations.                                                                                                                    | RN              |
| I understand that for 1 year following initial publication of the guidelines, I am encouraged by ASH to avoid new conflicts of interest that could reduce trust in the guidelines, in accordance with my own best judgment. | RN              |

Agreed by

Robby Nieuwlaat

Date

July 8, 2020

### Section 3. ASH Review Prior to Participation

For ASH Internal Use Only

| <i>Name, Role</i>                                                     | <i>Date</i> | <i>Management Notes</i> |
|-----------------------------------------------------------------------|-------------|-------------------------|
| Eddrika Russell, ASH Staff                                            | 7/14/2020   |                         |
| Menaka Pai, MD, ex officio ASH<br>Guideline Oversight<br>Subcommittee | 7/14/2020   | Participation approved  |

## Section 4. Disclosures and Attestations During Participation

For ASH Internal Use Only

| <i>Disclosure or attestation</i> | <i>Date</i> | <i>Reviewed by</i>        | <i>Management Notes</i>                                               |
|----------------------------------|-------------|---------------------------|-----------------------------------------------------------------------|
| Attestation                      | 7/8/2020    | Russell, Pai              | Dr. Nieuwlaat agreed to adhere to the policies described herein.      |
| Attestation                      | 6/29/2021   | Russell                   | Dr. Nieuwlaat agreed to adhere to the policies described herein.      |
| Attestation                      | 9/8/2021    | Russell                   | Dr. Nieuwlaat agreed to adhere to the policies described herein.      |
| Attestation                      | 1/18/2022   | Alexander                 | Dr. Nieuwlaat agreed to adhere to the policies described herein.      |
|                                  | 3/30/2022   | Deion Smith,<br>ASH Staff | Dr. Nieuwlaat confirmed that all information in this form is correct. |

## Section 5. Participation and Recusal History

For ASH Internal Use Only

| <i>Description</i>                                  | <i>End Date</i> | <i>Participated?</i> |
|-----------------------------------------------------|-----------------|----------------------|
| Review available evidence + update recommendation 3 | March 3, 2022   | Yes                  |
|                                                     |                 |                      |
|                                                     |                 |                      |



ASH Clinical Practice Guidelines  
Participant Information

---

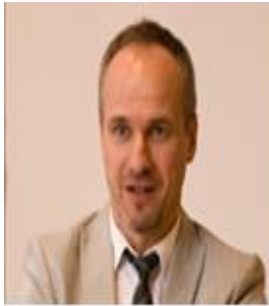

Holger J. Schünemann, MD, MSc, PhD

Professor of Clinical Epidemiology and of Medicine

McMaster University

Hamilton, Ontario, Canada

---

### Project

ASH Clinical Practice Guidelines on Anticoagulation in Patients With COVID-19

### Role

Methodology co-chair of Guideline Panel (June 2020 – February 2022)

Member of Guideline Panel (June 2020 - )

### Profile

Dr. Schünemann is an internist and methodologist at McMaster University. He cares for patients with COVID-19, and was involved in the development of ASH's VTE guidelines. He brings methodologic expertise and deep experience with GRADE to these guidelines.

[June 16, 2020 profile approved by Dr. Schünemann]



## Section 1. Disclosures Prior to Participation

### Definitions

**Conflict of interest**

A situation in which a reasonable person would consider that an individual’s judgments or actions regarding any aspect of the guideline development process is, or could be perceived to be, influenced by an outside interest

**Financial interest**

A position or relationship held by an individual that offers potential gain or loss of monetary value, such as employment, stock ownership, payment for services, or gifts given with the expectation of reciprocity

**Direct financial interest**

A financial interest that is owned by the individual or received directly by the individual

**Indirect financial interest**

A financial interest that is owned or received via an intermediary, e.g., research funding to an individual received through the individual’s academic institution

**For-profit healthcare company**

“A for-profit entity that develops, produces, markets, or distributes drugs, devices, services, or therapies used to diagnose, treat, monitor, manage, and alleviate health conditions. This definition is not intended to include non-profit entities, entities outside of the healthcare sector, or entities through which physicians provide clinical services directly to patients” (Council of Medical Specialty Societies’ “Code for Interactions With Industry” 2015). This definition is furthermore not viewed by ASH to include companies that provide accredited continuing medical education or that publish scientific or educational content.

### Part A. Direct Financial Interests

#### Employment With For-Profit Healthcare Companies

1. Are you currently or in the past 24 months have you been an employee of any **for-profit healthcare company**?

No

Yes, as described below:

Add rows as needed for each employment relationship.

| <i>Company</i> | <i>Description</i> | <i>End Date</i> | <i>For ASH Internal Use</i> |
|----------------|--------------------|-----------------|-----------------------------|
|                |                    |                 |                             |
|                |                    |                 |                             |

| <i>Company</i> | <i>Description</i> | <i>End Date</i> | <i>For ASH Internal Use</i> |
|----------------|--------------------|-----------------|-----------------------------|
|                |                    |                 |                             |
|                |                    |                 |                             |

Equity in For-Profit Healthcare Companies

2. Do you currently or in the past 24 months have you had equity in any **for-profit healthcare company**? Equity includes stock, stock options, and other ownership interests but excludes diversified mutual fund shares.

No

Yes, as described below:

Add rows as needed for each equity interest.

| <i>Company</i> | <i>Description</i> | <i>Date Divested</i> | <i>For ASH Internal Use</i> |
|----------------|--------------------|----------------------|-----------------------------|
|                |                    |                      |                             |
|                |                    |                      |                             |
|                |                    |                      |                             |
|                |                    |                      |                             |

Healthcare-Related Patents, Royalties, and Other Intellectual Property

3. Do you currently or in the past 24 months have you owned patents for or received royalties from any intellectual property or product used to diagnose, treat, monitor, manage, or alleviate health conditions?

No

Yes, as described below:

Add rows as needed for each patent or royalty interest.

| <i>Company</i> | <i>Description</i> | <i>Date Divested</i> | <i>For ASH Internal Use</i> |
|----------------|--------------------|----------------------|-----------------------------|
|                |                    |                      |                             |
|                |                    |                      |                             |
|                |                    |                      |                             |
|                |                    |                      |                             |

Personal Income or Other Direct Transfers of Value From For-Profit Healthcare Companies

4. Do you currently or in the past 24 months have you received any personal income or other direct transfers of value (e.g., honoraria, gifts, travel support, meeting registration, meals) from any **for-profit healthcare company**?

No

Yes, as described below:

Column 1 Name the company.

Column 2 Describe the activity for which you received the income or other transfer of value, e.g., research, consultancy, speakers bureau involvement, service on an advisory committee or board, expert testimony.

Column 3 Indicate when the activity ended, if applicable. (If the activity has not yet ended, indicate “current” or “ongoing.”)

Add rows as needed for each activity.

| <i>Company</i> | <i>Description</i> | <i>End Date</i> | <i>For ASH Internal Use</i> |
|----------------|--------------------|-----------------|-----------------------------|
|                |                    |                 |                             |
|                |                    |                 |                             |
|                |                    |                 |                             |
|                |                    |                 |                             |
|                |                    |                 |                             |
|                |                    |                 |                             |
|                |                    |                 |                             |
|                |                    |                 |                             |

My Partner’s or Spouse’s Interests

5. Currently or in the past 24 months has *your partner or spouse* had any of the interests or relationships described in questions 1-4?

No

Yes, as described below:

Add rows as needed for each interest.

| <i>Company</i> | <i>Description</i> | <i>End Date</i> | <i>For ASH Internal Use</i> |
|----------------|--------------------|-----------------|-----------------------------|
|                |                    |                 |                             |

| <i>Company</i> | <i>Description</i> | <i>End Date</i> | <i>For ASH Internal Use</i> |
|----------------|--------------------|-----------------|-----------------------------|
|                |                    |                 |                             |
|                |                    |                 |                             |

Other Relevant Direct Financial Interests

6. Do you have other current or recent (within the past 24 months) **direct financial interests** with any institution, organization, entity or individual that could be relevant to the work of developing these guidelines?

No

Yes

If yes, please explain:

## Part B. Indirect Financial Interests

### Institutional Research Funded by For-Profit Healthcare Companies

1. Through your institution, do you currently or in the past 24 months have you been involved in research funded or supported (e.g., in kind support, such as provision of a study drug) by any **for-profit healthcare company**?

No

Yes, as described below:

Column 1 Name the company funding or supporting the research.

Column 2 Briefly describe the research project.

Column 3 Describe your role: (a) national or overall principal investigator, (b) member of a steering committee of a study that does not have a principal investigator, (c) site or local investigator. If other than these options, please describe.

Column 4 Indicate when your involvement ended, if applicable. (If your involvement has not yet ended, indicate “current” or “ongoing.”)

Add rows as needed for each research project.

| <i>Company</i> | <i>Description of Research</i> | <i>My Role</i> | <i>End Date</i> | <i>For ASH Internal Use</i> |
|----------------|--------------------------------|----------------|-----------------|-----------------------------|
|                |                                |                |                 |                             |
|                |                                |                |                 |                             |
|                |                                |                |                 |                             |
|                |                                |                |                 |                             |
|                |                                |                |                 |                             |

### Paid and Volunteer Activities for Organizations Supported by For-Profit Healthcare Companies

2. Do you currently or in the past 24 months have you been involved in any volunteer or paid work for an organization that is wholly or partially funded by any **for-profit healthcare company**?

No

Yes, as described below:

Column 1 Name the organization. If known to you, describe any industry funding or support.

Column 2 Briefly describe your activity and role, e.g., employment, service on board of directors, other volunteer services.

Column 3 Indicate if your activity was paid or volunteered.

Column 4 Indicate when your involvement with the organization ended. (If your involvement has not yet ended, indicate “current” or “ongoing.”)

Add rows as needed for each organization.

| <i>Organization</i> | <i>Description and role</i>       | <i>Paid or Unpaid?</i> | <i>End Date</i> | <i>For ASH Internal Use</i> |
|---------------------|-----------------------------------|------------------------|-----------------|-----------------------------|
| Evidence Prime      | Support with GRADEpro development | Unpaid                 | ongoing         |                             |
|                     |                                   |                        |                 |                             |
|                     |                                   |                        |                 |                             |

#### Other Relevant Indirect Financial Interests

3. Do you have other **indirect financial interests** with any: (i) **for-profit healthcare** company; or (ii) other institution, organization, entity or individual that could be relevant to the work of developing these guidelines?

No

Yes

If yes, please explain:

## Part C. Relevant Other Interests That Are Not Mainly Financial

### Personal Beliefs

1. Do you have strongly held beliefs related to the topic of these guidelines?

No

Yes

If yes, please explain:

### Previously Published Opinions

2. Have you ever authored, coauthored, or publicly provided an opinion related to the topic of these guidelines, e.g., a clinical practice guideline, textbook, review article, meeting poster or presentation, grand rounds talk, letter to the editor?

No.

Yes

If yes, what were those views and where were they made?

ASH VTE guidelines on prevention and treatment.

### Non-Industry Supported Research

3. Currently or in the past 24 months, have you been involved in a leadership role in any research project not already reported under Part B, Question 1, relevant to the topic of these guidelines, e.g., a research project funded by a nonprofit or governmental organization?

No

Yes, as described below:

Column 1 Name the entity funding the research.

Column 2 Describe the research project.

Column 3 Describe your role: (a) national or overall principal investigator, (b) member of a steering committee of a study that does not have a principal investigator, (c) site or local investigator. If other than these options, please describe.

Column 4 Indicate when your involvement ended, if applicable. (If your involvement has not yet ended, indicate "current" or "ongoing.")

Add rows as needed for each research project.

| <i>Funder</i> | <i>Description of Research</i>                                  | <i>My Role</i> | <i>End Date</i> |
|---------------|-----------------------------------------------------------------|----------------|-----------------|
| ASH           | Funding from ASH for doing methods work and systematic reviews. | PI             | ongoing         |
|               |                                                                 |                |                 |
|               |                                                                 |                |                 |
|               |                                                                 |                |                 |

### Institutional Relationships

4. Could your compensation be affected by recommendations on this topic?

Don't know

No

Yes

If yes, please explain:

5. Do you generate revenues for your institution or employer by clinical activity, teaching, speaking, consulting, testifying, writing, or otherwise sharing your knowledge or opinions about this guideline topic?

Don't know

No

Yes

If yes, please explain:

6. Could your institution benefit or be harmed by guidelines on this topic?

Don't know

No

Yes

If yes, please explain:



### Career Advancement

7. How would you characterize the support you would receive from your primary mentor, institution, or other entities if your work on this panel or authorship of these guidelines generated a strong reaction from peers outside your institution?

Research publications lead to career advancement and it will undoubtedly help me although I have advanced in my career and the additional gain is marginal.

### Involvement in Organizations With Relevant Policies, Positions, or Guidelines

8. Are you involved as an employee, volunteer, or member of any organization that has published or to your knowledge is currently developing policies, positions, or guidelines relevant to these ASH guidelines, e.g., clinical practice guidelines, appropriate use criteria, expert consensus statement, mission statement, advocacy statement, amicus brief, or legislature or legal testimony?

No

Yes, as described below:

Column 1 Name the organization.

Column 2 Describe or reference the relevant policy, position, or guidelines.

Column 3 Describe your role with the organization, including your involvement in developing, disseminating, or implementing the relevant policy, position, or guidelines.

Add rows as needed for each organization.

| <i>Organization</i> | <i>Relevant Policy Position</i> | <i>Your Role</i> |
|---------------------|---------------------------------|------------------|
|                     |                                 |                  |
|                     |                                 |                  |
|                     |                                 |                  |
|                     |                                 |                  |

### Clinical Practice

9. Do you see patients clinically?

No

Yes

If yes, what is your primary specialty or subspecialty?

Internal medicine.

If yes, do you prescribe or otherwise recommend clinical interventions (e.g., screening or diagnostic tests, evaluations, treatments, procedures) that may be addressed by these guidelines?

No

Yes

If yes, please explain:

LMWH, tests for DVT/PE

#### Other

10. Do you have other nonfinancial interests or relationships not described above that could be relevant to the work of developing these guidelines?

No

Yes

If yes, please describe:

#### Expected Interests

11. Do you expect to enter into, within the next 24 months, any new **financial or nonfinancial interests** not described above that could be relevant to the work of developing these guidelines?

No

Yes

If yes, please describe:

## Section 2. Attestation of Compliance With Conflict of Interest Policies

In consideration of my participation on these guidelines, I hereby certify and agree that:

| <i>Policy</i>                                                                                                                                                                                                                                                                                                                                                                                                                                                                                                                                                                                                                                                                                                                                                                                                                                                                                                                                                                                                                                                                                                                                                                                                             | <i>Initials</i> |
|---------------------------------------------------------------------------------------------------------------------------------------------------------------------------------------------------------------------------------------------------------------------------------------------------------------------------------------------------------------------------------------------------------------------------------------------------------------------------------------------------------------------------------------------------------------------------------------------------------------------------------------------------------------------------------------------------------------------------------------------------------------------------------------------------------------------------------------------------------------------------------------------------------------------------------------------------------------------------------------------------------------------------------------------------------------------------------------------------------------------------------------------------------------------------------------------------------------------------|-----------------|
| I have reviewed and understand the ASH Principles and Policies on Conflict of Interest published on the ASH website at <a href="https://www.hematology.org/about/governance/conflict-of-interest">https://www.hematology.org/about/governance/conflict-of-interest</a> including the special Policy on Management of Conflicts in the Development of Clinical Practice Guidelines (“ASH Policy”).                                                                                                                                                                                                                                                                                                                                                                                                                                                                                                                                                                                                                                                                                                                                                                                                                         | HJS             |
| I have disclosed and will continue to disclose completely all potential conflicts of interest for myself and for my partner or spouse, to the best of my ability and knowledge, in accordance with ASH Policy and this Disclosure Form.                                                                                                                                                                                                                                                                                                                                                                                                                                                                                                                                                                                                                                                                                                                                                                                                                                                                                                                                                                                   | HJS             |
| To ensure completeness and avoid discrepancies, I have checked and periodically will check my financial disclosures against other published information, including from the U.S. Centers for Medicare and Medicaid Services’ Open Payments database (or similar non-U.S. database) and explain any discrepant information.                                                                                                                                                                                                                                                                                                                                                                                                                                                                                                                                                                                                                                                                                                                                                                                                                                                                                                | HJS             |
| <p>Until submission of the guidelines for publication, I understand and agree that without special exception from ASH, any of the following will disqualify me from continued participation and I will not enter into:</p> <ul style="list-style-type: none"> <li>• Any <b>direct financial interest</b> of myself or my partner or spouse in any <b>for-profit healthcare company or companies</b>, if such interests in aggregate may be reasonably valued to be &gt;\$5,000/year, regardless of relevance to the guidelines</li> <li>• Any noneducational speaking by myself on behalf of any <b>for-profit healthcare company</b> (e.g., service on a company “speakers bureau”), regardless of relevance to the guidelines</li> <li>• Consulting or advising about the marketing of products by any <b>for-profit healthcare company</b> (e.g., service on a company “advisory board”), regardless of relevance to the guidelines</li> <li>• Simultaneous participation on guidelines by another organization on the same topic</li> <li>• Any <i>undisclosed</i> financial interest in any <b>for-profit healthcare company</b> occurring in the 24 months prior to my participation on these guidelines</li> </ul> | HJS             |
| I understand that if a disqualifying interest is reported, the usual course of action will be dismissal from participation and acknowledgment within the guideline publication rather than authorship.                                                                                                                                                                                                                                                                                                                                                                                                                                                                                                                                                                                                                                                                                                                                                                                                                                                                                                                                                                                                                    | HJS             |
| At regular intervals during the guideline development process, as determined by ASH, I will review my information in this Disclosure Form; provide updated disclosures; and, if requested, attest that I do not have any interests that should disqualify my participation.                                                                                                                                                                                                                                                                                                                                                                                                                                                                                                                                                                                                                                                                                                                                                                                                                                                                                                                                               | HJS             |

| <i>Policy</i>                                                                                                                                                                                                               | <i>Initials</i> |
|-----------------------------------------------------------------------------------------------------------------------------------------------------------------------------------------------------------------------------|-----------------|
| I agree to publish with the guidelines my complete disclosures, this agreement, and future attestations.                                                                                                                    | HJS             |
| I understand that for 1 year following initial publication of the guidelines, I am encouraged by ASH to avoid new conflicts of interest that could reduce trust in the guidelines, in accordance with my own best judgment. | HJS             |

Agreed by

HOLGER SCHUNEMANN

Date

June 12, 2020

### Section 3. ASH Review Prior to Participation

For ASH Internal Use Only

| <i>Name, Role</i>                                    | <i>Date</i> | <i>Management Notes</i> |
|------------------------------------------------------|-------------|-------------------------|
| Eddrika Russell, ASH Staff                           | 6/12/2020   |                         |
| Menaka Pai, MD, ASH Guideline Oversight Subcommittee | 6/12/2020   | Participation approved  |

## Section 4. Disclosures and Attestations During Participation

For ASH Internal Use Only

| <i>Disclosure or attestation</i>                                                                                                                                                                                                                                             | <i>Date</i> | <i>Reviewed by</i>     | <i>Management Notes</i>                                               |
|------------------------------------------------------------------------------------------------------------------------------------------------------------------------------------------------------------------------------------------------------------------------------|-------------|------------------------|-----------------------------------------------------------------------|
| Attestation                                                                                                                                                                                                                                                                  | 6/12/2020   | Russell, Kunkle        | Dr. Schünemann agreed to adhere to the policies described herein.     |
| Attestation                                                                                                                                                                                                                                                                  | 9/14/2020   | Russell                | Dr. Schünemann agreed to adhere to the policies described herein.     |
| Dr. Schunemann disclosed that he received direct funding from the Canadian Government (CIHR) in 2020 and the World Health Organization (WHO) in 2021 to work on COVID-19 recommendation maps.                                                                                | 5/14/2021   | Russell, Alexander     | Disclosure only.                                                      |
| Attestation                                                                                                                                                                                                                                                                  | 5/24/2021   | Russell                | Dr. Schünemann agreed to adhere to the policies described herein.     |
| Dr. Schunemann disclosed that, as the Nominated Principle Applicant, he received direct funding from CIHR to maintain the recommendation maps previously disclosed and for using the map in knowledge mobilization activities to support decision-making by public citizens. | 8/17/2021   | Russell, Alexander     | Disclosure only.                                                      |
| Attestation                                                                                                                                                                                                                                                                  | 8/18/2021   | Russell                | Dr. Schünemann agreed to adhere to the policies described herein.     |
| Attestation                                                                                                                                                                                                                                                                  | 9/14/2021   | Russell                | Dr. Schünemann agreed to adhere to the policies described herein.     |
| Attestation                                                                                                                                                                                                                                                                  | 1/29/2022   | Alexander              | Dr. Schünemann agreed to adhere to the policies described herein.     |
|                                                                                                                                                                                                                                                                              | 4/4/2022    | Deion Smith, ASH Staff | Dr. Schünemann confirmed that all information in the form is correct. |

## Section 5. Participation and Recusal History

For ASH Internal Use Only

| <i>Description</i>                                   | <i>End Date</i>    | <i>Participated?</i> |
|------------------------------------------------------|--------------------|----------------------|
| Receive orientation.                                 | June 24, 2020      | Yes                  |
| Prioritize guideline questions.                      | July 8, 2020       | Yes                  |
| Review available evidence                            | September 30, 2020 | Yes                  |
| Form recommendations 1&2                             | October 8, 2020    | Yes                  |
| Review public comments.                              | October 27, 2020   | Yes                  |
| Develop guideline report for publication.            | October 27, 2020   | Yes                  |
| Review available evidence + form recommendation 1A   | April 7, 2021      | Yes                  |
| Develop guideline report for publication (1A)        | June 4, 2021       | Yes                  |
| Review available evidence + form recommendation 3    | April 14, 2021     | Yes                  |
| Develop guideline report for publication (3)         | August 13, 2021    | Yes                  |
| Review available evidence (2B)                       | November 9, 2021   | Yes                  |
| Update recommendation 2B                             | November 17, 2021  | Yes                  |
| Develop guideline report for publication (2B)        | January 31, 2022   | Yes                  |
| Review available evidence + update recommendation 1B | January 27, 2022   | Yes                  |
| Develop guideline report for publication (1B)        |                    |                      |
| Review available evidence + update recommendation 3  | March 3, 2022      | Yes                  |



ASH Clinical Practice Guidelines  
Participant Information

---

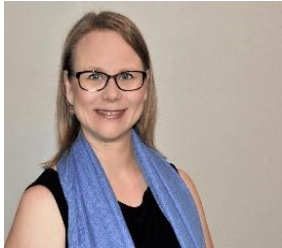

Adrienne Stevens, MSc, PhD

Methodologist

Cochrane Canada, McMaster University

Ontario, Canada

---

### Project

ASH Clinical Practice Guidelines on Anticoagulation in Patients with COVID-19

### Role

Methods Team Member

### Profile

Dr. Adrienne Stevens is the Managing Director of Cochrane Canada in the Department of Health Research Methods, Evidence, and Impact at McMaster University. She is a clinical epidemiologist and methodologist with expertise in systematic, rapid, and scoping reviews. She is Co-Convenor of the Cochrane Rapid Reviews Methods Group. She was formerly Scientific Lead of the Ottawa Evidence Review and Synthesis Centre, which produces systematic reviews as part of Canadian Task Force on Preventive Health Care guideline development process. She received a PhD in epidemiology from the University of Split School of Medicine, Croatia.

[October 13, 2020 profile approved by Dr. Stevens. April 4, 2022, profile updated by Dr. Stevens.]



## Section 1. Disclosures Prior to Participation

### Definitions

**Conflict of interest**

A situation in which a reasonable person would consider that an individual’s judgments or actions regarding any aspect of the guideline development process is, or could be perceived to be, influenced by an outside interest

**Financial interest**

A position or relationship held by an individual that offers potential gain or loss of monetary value, such as employment, stock ownership, payment for services, or gifts given with the expectation of reciprocity

**Direct financial interest**

A financial interest that is owned by the individual or received directly by the individual

**Indirect financial interest**

A financial interest that is owned or received via an intermediary, e.g., research funding to an individual received through the individual’s academic institution

**For-profit healthcare company**

“A for-profit entity that develops, produces, markets, or distributes drugs, devices, services, or therapies used to diagnose, treat, monitor, manage, and alleviate health conditions. This definition is not intended to include non-profit entities, entities outside of the healthcare sector, or entities through which physicians provide clinical services directly to patients” (Council of Medical Specialty Societies’ “Code for Interactions With Industry” 2015). This definition is furthermore not viewed by ASH to include companies that provide accredited continuing medical education or that publish scientific or educational content.

### Part A. Direct Financial Interests

#### Employment With For-Profit Healthcare Companies

1. Are you currently or in the past 24 months have you been an employee of any **for-profit healthcare company**?

No

Yes, as described below:

Add rows as needed for each employment relationship.

| <i>Company</i> | <i>Description</i> | <i>End Date</i> | <i>For ASH Internal Use</i> |
|----------------|--------------------|-----------------|-----------------------------|
|                |                    |                 |                             |

### Equity in For-Profit Healthcare Companies

2. Do you currently or in the past 24 months have you had equity in any **for-profit healthcare company**? Equity includes stock, stock options, and other ownership interests but excludes diversified mutual fund shares.

No

Yes, as described below:

Add rows as needed for each equity interest.

| <i>Company</i> | <i>Description</i> | <i>Date Divested</i> | <i>For ASH Internal Use</i> |
|----------------|--------------------|----------------------|-----------------------------|
|                |                    |                      |                             |

### Healthcare-Related Patents, Royalties, and Other Intellectual Property

3. Do you currently or in the past 24 months have you owned patents for or received royalties from any intellectual property or product used to diagnose, treat, monitor, manage, or alleviate health conditions?

No

Yes, as described below:

Add rows as needed for each patent or royalty interest.

| <i>Company</i> | <i>Description</i> | <i>Date Divested</i> | <i>For ASH Internal Use</i> |
|----------------|--------------------|----------------------|-----------------------------|
|                |                    |                      |                             |

### Personal Income or Other Direct Transfers of Value From For-Profit Healthcare Companies

4. Do you currently or in the past 24 months have you received any personal income or other direct transfers of value (e.g., honoraria, gifts, travel support, meeting registration, meals) from any **for-profit healthcare company**?

No

Yes, as described below:

Column 1 Name the company.

Column 2 Describe the activity for which you received the income or other transfer of value, e.g., research, consultancy, speakers bureau involvement, service on an advisory committee or board, expert testimony.

Column 3 Indicate when the activity ended, if applicable. (If the activity has not yet ended, indicate “current” or “ongoing.”)

Add rows as needed for each activity.

| <i>Company</i> | <i>Description</i> | <i>End Date</i> | <i>For ASH Internal Use</i> |
|----------------|--------------------|-----------------|-----------------------------|
|                |                    |                 |                             |

#### My Partner’s or Spouse’s Interests

5. Currently or in the past 24 months has *your partner or spouse* had any of the interests or relationships described in questions 1-4?

No

Yes, as described below:

Add rows as needed for each interest.

| <i>Company</i> | <i>Description</i> | <i>End Date</i> | <i>For ASH Internal Use</i> |
|----------------|--------------------|-----------------|-----------------------------|
|                |                    |                 |                             |

#### Other Relevant Direct Financial Interests

6. Do you have other current or recent (within the past 24 months) **direct financial interests** with any institution, organization, entity or individual that could be relevant to the work of developing these guidelines?

No

Yes

If yes, please explain:

## Part B. Indirect Financial Interests

### Institutional Research Funded by For-Profit Healthcare Companies

1. Through your institution, do you currently or in the past 24 months have you been involved in research funded or supported (e.g., in kind support, such as provision of a study drug) by any **for-profit healthcare company**?

No

Yes, as described below:

Column 1 Name the company funding or supporting the research.

Column 2 Briefly describe the research project.

Column 3 Describe your role: (a) national or overall principal investigator, (b) member of a steering committee of a study that does not have a principal investigator, (c) site or local investigator. If other than these options, please describe.

Column 4 Indicate when your involvement ended, if applicable. (If your involvement has not yet ended, indicate “current” or “ongoing.”)

Add rows as needed for each research project.

| <i>Company</i> | <i>Description of Research</i> | <i>My Role</i> | <i>End Date</i> | <i>For ASH Internal Use</i> |
|----------------|--------------------------------|----------------|-----------------|-----------------------------|
|                |                                |                |                 |                             |

### Paid and Volunteer Activities for Organizations Supported by For-Profit Healthcare Companies

2. Do you currently or in the past 24 months have you been involved in any volunteer or paid work for an organization that is wholly or partially funded by any **for-profit healthcare company**?

No

Yes, as described below:

Column 1 Name the organization. If known to you, describe any industry funding or support.

Column 2 Briefly describe your activity and role, e.g., employment, service on board of directors, other volunteer services.

Column 3 Indicate if your activity was paid or volunteered.

Column 4 Indicate when your involvement with the organization ended. (If your involvement has not yet ended, indicate “current” or “ongoing.”)

Add rows as needed for each organization.

| <i>Organization</i> | <i>Description and role</i> | <i>Paid or Unpaid?</i> | <i>End Date</i> | <i>For ASH Internal Use</i> |
|---------------------|-----------------------------|------------------------|-----------------|-----------------------------|
|                     |                             |                        |                 |                             |

Other Relevant Indirect Financial Interests

3. Do you have other **indirect financial interests** with any: (i) **for-profit healthcare** company; or (ii) other institution, organization, entity or individual that could be relevant to the work of developing these guidelines?

No

Yes

If yes, please explain:

## Part C. Relevant Other Interests That Are Not Mainly Financial

### Personal Beliefs

1. Do you have strongly held beliefs related to the topic of these guidelines?

No

Yes

If yes, please explain:

### Previously Published Opinions

2. Have you ever authored, coauthored, or publicly provided an opinion related to the topic of these guidelines, e.g., a clinical practice guideline, textbook, review article, meeting poster or presentation, grand rounds talk, letter to the editor?

No

Yes

If yes, what were those views and where were they made?

### Non-Industry Supported Research

3. Currently or in the past 24 months, have you been involved in a leadership role in any research project not already reported under Part B, Question 1, relevant to the topic of these guidelines, e.g., a research project funded by a nonprofit or governmental organization?

No

Yes, as described below:

Column 1 Name the entity funding the research.

Column 2 Describe the research project.

Column 3 Describe your role: (a) national or overall principal investigator, (b) member of a steering committee of a study that does not have a principal investigator, (c) site or local investigator. If other than these options, please describe.

Column 4 Indicate when your involvement ended, if applicable. (If your involvement has not yet ended, indicate "current" or "ongoing.")

Add rows as needed for each research project.

| <i>Funder</i> | <i>Description of Research</i> | <i>My Role</i> | <i>End Date</i> |
|---------------|--------------------------------|----------------|-----------------|
|               |                                |                |                 |

### Institutional Relationships

4. Could your compensation be affected by recommendations on this topic?

Don't know

No

Yes

If yes, please explain:

5. Do you generate revenues for your institution or employer by clinical activity, teaching, speaking, consulting, testifying, writing, or otherwise sharing your knowledge or opinions about this guideline topic?

Don't know

No

Yes

If yes, please explain:

6. Could your institution benefit or be harmed by guidelines on this topic?

Don't know

No

Yes

If yes, please explain:

### Career Advancement

7. How would you characterize the support you would receive from your primary mentor, institution, or other entities if your work on this panel or authorship of these guidelines generated a strong reaction from peers outside your institution?

I would not expect any change in support from our institution given our expertise in systematically evaluating the evidence, for which the methods and process are scientifically defensible.

Involvement in Organizations With Relevant Policies, Positions, or Guidelines

8. Are you involved as an employee, volunteer, or member of any organization that has published or to your knowledge is currently developing policies, positions, or guidelines relevant to these ASH guidelines, e.g., clinical practice guidelines, appropriate use criteria, expert consensus statement, mission statement, advocacy statement, amicus brief, or legislature or legal testimony?

No

Yes, as described below:

Column 1 Name the organization.

Column 2 Describe or reference the relevant policy, position, or guidelines.

Column 3 Describe your role with the organization, including your involvement in developing, disseminating, or implementing the relevant policy, position, or guidelines.

Add rows as needed for each organization.

| <i>Organization</i> | <i>Relevant Policy Position</i> | <i>Your Role</i> |
|---------------------|---------------------------------|------------------|
|                     |                                 |                  |

Clinical Practice

9. Do you see patients clinically?

No

Yes

If yes, what is your primary specialty or subspecialty?

If yes, do you prescribe or otherwise recommend clinical interventions (e.g., screening or diagnostic tests, evaluations, treatments, procedures) that may be addressed by these guidelines?

No

Yes

If yes, please explain:



### Other

10. Do you have other nonfinancial interests or relationships not described above that could be relevant to the work of developing these guidelines?

No

Yes

If yes, please describe:

### Expected Interests

11. Do you expect to enter into, within the next 24 months, any new **financial or nonfinancial interests** not described above that could be relevant to the work of developing these guidelines?

No

Yes

If yes, please describe:

## Section 2. Attestation of Compliance With Conflict of Interest Policies

In consideration of my participation on these guidelines, I hereby certify and agree that:

| <i>Policy</i>                                                                                                                                                                                                                                                                                                                                                                                                                                                                                                                                                                                                                                                                                                                                                                                                                                                                                                                                                                                                                                                                                                                                                                                                             | <i>Initials</i> |
|---------------------------------------------------------------------------------------------------------------------------------------------------------------------------------------------------------------------------------------------------------------------------------------------------------------------------------------------------------------------------------------------------------------------------------------------------------------------------------------------------------------------------------------------------------------------------------------------------------------------------------------------------------------------------------------------------------------------------------------------------------------------------------------------------------------------------------------------------------------------------------------------------------------------------------------------------------------------------------------------------------------------------------------------------------------------------------------------------------------------------------------------------------------------------------------------------------------------------|-----------------|
| I have reviewed and understand the ASH Principles and Policies on Conflict of Interest published on the ASH website at <a href="https://www.hematology.org/about/governance/conflict-of-interest">https://www.hematology.org/about/governance/conflict-of-interest</a> including the special Policy on Management of Conflicts in the Development of Clinical Practice Guidelines (“ASH Policy”).                                                                                                                                                                                                                                                                                                                                                                                                                                                                                                                                                                                                                                                                                                                                                                                                                         | ALS             |
| I have disclosed and will continue to disclose completely all potential conflicts of interest for myself and for my partner or spouse, to the best of my ability and knowledge, in accordance with ASH Policy and this Disclosure Form.                                                                                                                                                                                                                                                                                                                                                                                                                                                                                                                                                                                                                                                                                                                                                                                                                                                                                                                                                                                   | ALS             |
| To ensure completeness and avoid discrepancies, I have checked and periodically will check my financial disclosures against other published information, including from the U.S. Centers for Medicare and Medicaid Services’ Open Payments database (or similar non-U.S. database) and explain any discrepant information.                                                                                                                                                                                                                                                                                                                                                                                                                                                                                                                                                                                                                                                                                                                                                                                                                                                                                                | ALS             |
| <p>Until submission of the guidelines for publication, I understand and agree that without special exception from ASH, any of the following will disqualify me from continued participation and I will not enter into:</p> <ul style="list-style-type: none"> <li>• Any <b>direct financial interest</b> of myself or my partner or spouse in any <b>for-profit healthcare company or companies</b>, if such interests in aggregate may be reasonably valued to be &gt;\$5,000/year, regardless of relevance to the guidelines</li> <li>• Any noneducational speaking by myself on behalf of any <b>for-profit healthcare company</b> (e.g., service on a company “speakers bureau”), regardless of relevance to the guidelines</li> <li>• Consulting or advising about the marketing of products by any <b>for-profit healthcare company</b> (e.g., service on a company “advisory board”), regardless of relevance to the guidelines</li> <li>• Simultaneous participation on guidelines by another organization on the same topic</li> <li>• Any <i>undisclosed</i> financial interest in any <b>for-profit healthcare company</b> occurring in the 24 months prior to my participation on these guidelines</li> </ul> | ALS             |
| I understand that if a disqualifying interest is reported, the usual course of action will be dismissal from participation and acknowledgment within the guideline publication rather than authorship.                                                                                                                                                                                                                                                                                                                                                                                                                                                                                                                                                                                                                                                                                                                                                                                                                                                                                                                                                                                                                    | ALS             |
| At regular intervals during the guideline development process, as determined by ASH, I will review my information in this Disclosure Form; provide updated                                                                                                                                                                                                                                                                                                                                                                                                                                                                                                                                                                                                                                                                                                                                                                                                                                                                                                                                                                                                                                                                | ALS             |

|                                                                                                                                                                                                                             |     |
|-----------------------------------------------------------------------------------------------------------------------------------------------------------------------------------------------------------------------------|-----|
| disclosures; and, if requested, attest that I do not have any interests that should disqualify my participation.                                                                                                            |     |
| I agree to publish with the guidelines my complete disclosures, this agreement, and future attestations.                                                                                                                    | ALS |
| I understand that for 1 year following initial publication of the guidelines, I am encouraged by ASH to avoid new conflicts of interest that could reduce trust in the guidelines, in accordance with my own best judgment. | ALS |

Agreed by

Adrienne Stevens

Date

06 October 2020

### Section 3. ASH Review Prior to Participation

For ASH Internal Use Only

| <i>Name, Role</i>                                                     | <i>Date</i>     | <i>Management Notes</i> |
|-----------------------------------------------------------------------|-----------------|-------------------------|
| Eddrika Russell, ASH Staff                                            | October 6, 2020 |                         |
| Rob Kunkle, ASH Staff                                                 | October 6, 2020 |                         |
| Menaka Pai, MD, Ex Officio ASH<br>Guideline Oversight<br>Subcommittee | October 6, 2020 | Participation approved  |

## Section 4. Disclosures and Attestations During Participation

For ASH Internal Use Only

| <i>Disclosure or attestation</i> | <i>Date</i>      | <i>Reviewed by</i>     | <i>Management Notes</i>                                                    |
|----------------------------------|------------------|------------------------|----------------------------------------------------------------------------|
| Attestation                      | August 3, 2021   | Russell                | Dr. Stevens agreed to continue to adhere to the policies described herein. |
| Attestation                      | October 2, 2021  | Russell                | Dr. Stevens agreed to continue to adhere to the policies described herein. |
| Attestation                      | January 23, 2022 | Deion Smith, ASH Staff | Dr. Stevens agreed to continue to adhere to the policies described herein. |
|                                  | April 4, 2022    | Smith                  | Dr. Stevens confirmed that all information in the form is correct.         |

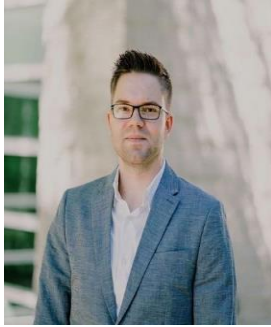

## Wojtek Wiercioch, PhD, MSc

Research Methodologist

McMaster University

Hamilton, Ontario, Canada

---

### Project

ASH Clinical Practice Guidelines on Anticoagulation in Patients with COVID-19

### Role

Methods Team Member

### Profile

Wojtek Wiercioch is a research methodologist at the McMaster GRADE Centre in the Department of Health Research Methods, Evidence, and Impact at McMaster University, Hamilton, Canada. His research focus is in evidence synthesis, guideline development methodology, and the guideline development process. His main research activities include development of guidelines and systematic reviews in collaboration with medical professional societies, healthcare organizations and ministries of health, as well as development and evaluation of guideline methods. Mr. Wiercioch has recently served as a systematic review lead and guideline development methodologist for the American Society of Hematology guidelines on VTE management. He is a member of the GRADE working group, participating in teaching systematic review and guideline methods, and a member of the Cochrane Living Evidence Network.

[July 15, 2020 profile approved by Dr. Wiercioch]

## Section 1. Disclosures Prior to Participation

### Definitions

**Conflict of interest**

A situation in which a reasonable person would consider that an individual’s judgments or actions regarding any aspect of the guideline development process is, or could be perceived to be, influenced by an outside interest

**Financial interest**

A position or relationship held by an individual that offers potential gain or loss of monetary value, such as employment, stock ownership, payment for services, or gifts given with the expectation of reciprocity

**Direct financial interest**

A financial interest that is owned by the individual or received directly by the individual

**Indirect financial interest**

A financial interest that is owned or received via an intermediary, e.g., research funding to an individual received through the individual’s academic institution

**For-profit healthcare company**

“A for-profit entity that develops, produces, markets, or distributes drugs, devices, services, or therapies used to diagnose, treat, monitor, manage, and alleviate health conditions. This definition is not intended to include non-profit entities, entities outside of the healthcare sector, or entities through which physicians provide clinical services directly to patients” (Council of Medical Specialty Societies’ “Code for Interactions With Industry” 2015). This definition is furthermore not viewed by ASH to include companies that provide accredited continuing medical education or that publish scientific or educational content.

### Part A. Direct Financial Interests

#### Employment With For-Profit Healthcare Companies

1. Are you currently or in the past 24 months have you been an employee of any **for-profit healthcare company**?

No

Yes, as described below:

Add rows as needed for each employment relationship.

| <i>Company</i> | <i>Description</i> | <i>End Date</i> | <i>For ASH Internal Use</i> |
|----------------|--------------------|-----------------|-----------------------------|
|                |                    |                 |                             |

### Equity in For-Profit Healthcare Companies

2. Do you currently or in the past 24 months have you had equity in any **for-profit healthcare company**? Equity includes stock, stock options, and other ownership interests but excludes diversified mutual fund shares.

No

Yes, as described below:

Add rows as needed for each equity interest.

| <i>Company</i> | <i>Description</i> | <i>Date Divested</i> | <i>For ASH Internal Use</i> |
|----------------|--------------------|----------------------|-----------------------------|
|                |                    |                      |                             |

### Healthcare-Related Patents, Royalties, and Other Intellectual Property

3. Do you currently or in the past 24 months have you owned patents for or received royalties from any intellectual property or product used to diagnose, treat, monitor, manage, or alleviate health conditions?

No

Yes, as described below:

Add rows as needed for each patent or royalty interest.

| <i>Company</i> | <i>Description</i> | <i>Date Divested</i> | <i>For ASH Internal Use</i> |
|----------------|--------------------|----------------------|-----------------------------|
|                |                    |                      |                             |

### Personal Income or Other Direct Transfers of Value From For-Profit Healthcare Companies

4. Do you currently or in the past 24 months have you received any personal income or other direct transfers of value (e.g., honoraria, gifts, travel support, meeting registration, meals) from any **for-profit healthcare company**?

No

Yes, as described below:

Column 1 Name the company.

Column 2 Describe the activity for which you received the income or other transfer of value, e.g., research, consultancy, speakers bureau involvement, service on an advisory committee or board, expert testimony.

Column 3 Indicate when the activity ended, if applicable. (If the activity has not yet ended, indicate "current" or "ongoing.")



Add rows as needed for each activity.

| <i>Company</i> | <i>Description</i> | <i>End Date</i> | <i>For ASH Internal Use</i> |
|----------------|--------------------|-----------------|-----------------------------|
|                |                    |                 |                             |

#### My Partner's or Spouse's Interests

5. Currently or in the past 24 months has *your partner or spouse* had any of the interests or relationships described in questions 1-4?

No

Yes, as described below:

Add rows as needed for each interest.

| <i>Company</i> | <i>Description</i> | <i>End Date</i> | <i>For ASH Internal Use</i> |
|----------------|--------------------|-----------------|-----------------------------|
|                |                    |                 |                             |

#### Other Relevant Direct Financial Interests

6. Do you have other current or recent (within the past 24 months) **direct financial interests** with any institution, organization, entity or individual that could be relevant to the work of developing these guidelines?

No

Yes

If yes, please explain:

## Part B. Indirect Financial Interests

### Institutional Research Funded by For-Profit Healthcare Companies

1. Through your institution, do you currently or in the past 24 months have you been involved in research funded or supported (e.g., in kind support, such as provision of a study drug) by any **for-profit healthcare company**?

No

Yes, as described below:

Column 1 Name the company funding or supporting the research.

Column 2 Briefly describe the research project.

Column 3 Describe your role: (a) national or overall principal investigator, (b) member of a steering committee of a study that does not have a principal investigator, (c) site or local investigator. If other than these options, please describe.

Column 4 Indicate when your involvement ended, if applicable. (If your involvement has not yet ended, indicate “current” or “ongoing.”)

Add rows as needed for each research project.

| <i>Company</i> | <i>Description of Research</i> | <i>My Role</i> | <i>End Date</i> | <i>For ASH Internal Use</i> |
|----------------|--------------------------------|----------------|-----------------|-----------------------------|
|                |                                |                |                 |                             |

### Paid and Volunteer Activities for Organizations Supported by For-Profit Healthcare Companies

2. Do you currently or in the past 24 months have you been involved in any volunteer or paid work for an organization that is wholly or partially funded by any **for-profit healthcare company**?

No

Yes, as described below:

Column 1 Name the organization. If known to you, describe any industry funding or support.

Column 2 Briefly describe your activity and role, e.g., employment, service on board of directors, other volunteer services.

Column 3 Indicate if your activity was paid or volunteered.

Column 4 Indicate when your involvement with the organization ended. (If your involvement has not yet ended, indicate “current” or “ongoing.”)

Add rows as needed for each organization.

| <i>Organization</i> | <i>Description and role</i> | <i>Paid or Unpaid?</i> | <i>End Date</i> | <i>For ASH Internal Use</i> |
|---------------------|-----------------------------|------------------------|-----------------|-----------------------------|
|                     |                             |                        |                 |                             |

Other Relevant Indirect Financial Interests

3. Do you have other **indirect financial interests** with any: (i) **for-profit healthcare** company; or (ii) other institution, organization, entity or individual that could be relevant to the work of developing these guidelines?

No

Yes

If yes, please explain:

## Part C. Relevant Other Interests That Are Not Mainly Financial

### Personal Beliefs

1. Do you have strongly held beliefs related to the topic of these guidelines?

No

Yes

If yes, please explain:

### Previously Published Opinions

2. Have you ever authored, coauthored, or publicly provided an opinion related to the topic of these guidelines, e.g., a clinical practice guideline, textbook, review article, meeting poster or presentation, grand rounds talk, letter to the editor?

No

Yes

If yes, what were those views and where were they made?

Co-author of clinical practice guidelines on VTE management. Participated as member of evidence synthesis team and project coordinator. Did not participate as voting panel member; did not express views or opinions related to the topic.

- American Society of Hematology 2018 guidelines for management of venous thromboembolism: prophylaxis for hospitalized and nonhospitalized medical patients. (*Blood Adv (2018) 2 (22): 3198–3225*)
- American Society of Hematology 2018 guidelines for management of venous thromboembolism: diagnosis of venous thromboembolism. (*Blood Adv (2018) 2 (22): 3226–3256.*)
- American Society of Hematology 2019 guidelines for management of venous thromboembolism: prevention of venous thromboembolism in surgical hospitalized patients. (*Blood Adv (2019) 3 (23): 3898–3944*)

### Non-Industry Supported Research

3. Currently or in the past 24 months, have you been involved in a leadership role in any research project not already reported under Part B, Question 1, relevant to the topic of these guidelines, e.g., a research project funded by a nonprofit or governmental organization?

No

Yes, as described below:

Column 1 Name the entity funding the research.

Column 2 Describe the research project.

Column 3 Describe your role: (a) national or overall principal investigator, (b) member of a steering committee of a study that does not have a principal investigator, (c) site or local investigator. If other than these options, please describe.

Column 4 Indicate when your involvement ended, if applicable. (If your involvement has not yet ended, indicate “current” or “ongoing.”)

Add rows as needed for each research project.

| <i>Funder</i>                                                                       | <i>Description of Research</i>                                        | <i>My Role</i>                               | <i>End Date</i>         |
|-------------------------------------------------------------------------------------|-----------------------------------------------------------------------|----------------------------------------------|-------------------------|
| American Association for Thoracic Surgery and European Society of Thoracic Surgeons | Clinical practice guideline on prevention of VTE in thoracic surgery. | Methodology co-chair and evidence synthesis. | Current until ~Dec 2020 |

#### Institutional Relationships

4. Could your compensation be affected by recommendations on this topic?

Don't know

No

Yes

If yes, please explain:

5. Do you generate revenues for your institution or employer by clinical activity, teaching, speaking, consulting, testifying, writing, or otherwise sharing your knowledge or opinions about this guideline topic?

Don't know

No

Yes

If yes, please explain:

6. Could your institution benefit or be harmed by guidelines on this topic?

Don't know

No

Yes

If yes, please explain:

### Career Advancement

7. How would you characterize the support you would receive from your primary mentor, institution, or other entities if your work on this panel or authorship of these guidelines generated a strong reaction from peers outside your institution?

If the guidelines are well received (e.g. viewed as high quality), would support career advancement and have positive impact through research metrics (e.g. h-index). If the guidelines are poorly received, may lead to professional criticism of the work and responsibility of the work.

### Involvement in Organizations With Relevant Policies, Positions, or Guidelines

8. Are you involved as an employee, volunteer, or member of any organization that has published or to your knowledge is currently developing policies, positions, or guidelines relevant to these ASH guidelines, e.g., clinical practice guidelines, appropriate use criteria, expert consensus statement, mission statement, advocacy statement, amicus brief, or legislature or legal testimony?

No

Yes, as described below:

Column 1 Name the organization.

Column 2 Describe or reference the relevant policy, position, or guidelines.

Column 3 Describe your role with the organization, including your involvement in developing, disseminating, or implementing the relevant policy, position, or guidelines.

Add rows as needed for each organization.

| <i>Organization</i> | <i>Relevant Policy Position</i> | <i>Your Role</i> |
|---------------------|---------------------------------|------------------|
|                     |                                 |                  |

### Clinical Practice

9. Do you see patients clinically?

No

Yes

If yes, what is your primary specialty or subspecialty?

If yes, do you prescribe or otherwise recommend clinical interventions (e.g., screening or diagnostic tests, evaluations, treatments, procedures) that may be addressed by these guidelines?

No

Yes

If yes, please explain:

#### Other

10. Do you have other nonfinancial interests or relationships not described above that could be relevant to the work of developing these guidelines?

No

Yes

If yes, please describe:

#### Expected Interests

11. Do you expect to enter into, within the next 24 months, any new **financial or nonfinancial interests** not described above that could be relevant to the work of developing these guidelines?

No

Yes

If yes, please describe:

## Section 2. Attestation of Compliance With Conflict of Interest Policies

In consideration of my participation on these guidelines, I hereby certify and agree that:

| <i>Policy</i>                                                                                                                                                                                                                                                                                                                                                                                                                                                                                                                                                                                                                                                                                                                                                                                                                                                                                                                                                                                                                                                                                                                                                                                                             | <i>Initials</i> |
|---------------------------------------------------------------------------------------------------------------------------------------------------------------------------------------------------------------------------------------------------------------------------------------------------------------------------------------------------------------------------------------------------------------------------------------------------------------------------------------------------------------------------------------------------------------------------------------------------------------------------------------------------------------------------------------------------------------------------------------------------------------------------------------------------------------------------------------------------------------------------------------------------------------------------------------------------------------------------------------------------------------------------------------------------------------------------------------------------------------------------------------------------------------------------------------------------------------------------|-----------------|
| I have reviewed and understand the ASH Principles and Policies on Conflict of Interest published on the ASH website at <a href="https://www.hematology.org/about/governance/conflict-of-interest">https://www.hematology.org/about/governance/conflict-of-interest</a> including the special Policy on Management of Conflicts in the Development of Clinical Practice Guidelines (“ASH Policy”).                                                                                                                                                                                                                                                                                                                                                                                                                                                                                                                                                                                                                                                                                                                                                                                                                         | WW              |
| I have disclosed and will continue to disclose completely all potential conflicts of interest for myself and for my partner or spouse, to the best of my ability and knowledge, in accordance with ASH Policy and this Disclosure Form.                                                                                                                                                                                                                                                                                                                                                                                                                                                                                                                                                                                                                                                                                                                                                                                                                                                                                                                                                                                   | WW              |
| To ensure completeness and avoid discrepancies, I have checked and periodically will check my financial disclosures against other published information, including from the U.S. Centers for Medicare and Medicaid Services’ Open Payments database (or similar non-U.S. database) and explain any discrepant information.                                                                                                                                                                                                                                                                                                                                                                                                                                                                                                                                                                                                                                                                                                                                                                                                                                                                                                | WW              |
| <p>Until submission of the guidelines for publication, I understand and agree that without special exception from ASH, any of the following will disqualify me from continued participation and I will not enter into:</p> <ul style="list-style-type: none"> <li>• Any <b>direct financial interest</b> of myself or my partner or spouse in any <b>for-profit healthcare company or companies</b>, if such interests in aggregate may be reasonably valued to be &gt;\$5,000/year, regardless of relevance to the guidelines</li> <li>• Any noneducational speaking by myself on behalf of any <b>for-profit healthcare company</b> (e.g., service on a company “speakers bureau”), regardless of relevance to the guidelines</li> <li>• Consulting or advising about the marketing of products by any <b>for-profit healthcare company</b> (e.g., service on a company “advisory board”), regardless of relevance to the guidelines</li> <li>• Simultaneous participation on guidelines by another organization on the same topic</li> <li>• Any <i>undisclosed</i> financial interest in any <b>for-profit healthcare company</b> occurring in the 24 months prior to my participation on these guidelines</li> </ul> | WW              |
| I understand that if a disqualifying interest is reported, the usual course of action will be dismissal from participation and acknowledgment within the guideline publication rather than authorship.                                                                                                                                                                                                                                                                                                                                                                                                                                                                                                                                                                                                                                                                                                                                                                                                                                                                                                                                                                                                                    | WW              |
| At regular intervals during the guideline development process, as determined by ASH, I will review my information in this Disclosure Form; provide updated disclosures; and, if requested, attest that I do not have any interests that should disqualify my participation.                                                                                                                                                                                                                                                                                                                                                                                                                                                                                                                                                                                                                                                                                                                                                                                                                                                                                                                                               | WW              |



|                                                                                                                                                                                                                             |    |
|-----------------------------------------------------------------------------------------------------------------------------------------------------------------------------------------------------------------------------|----|
| I agree to publish with the guidelines my complete disclosures, this agreement, and future attestations.                                                                                                                    | WW |
| I understand that for 1 year following initial publication of the guidelines, I am encouraged by ASH to avoid new conflicts of interest that could reduce trust in the guidelines, in accordance with my own best judgment. | WW |

Agreed by

Wojtek Wiercioch

Date

June 26, 2020

### Section 3. ASH Review Prior to Participation

For ASH Internal Use Only

| <i>Name, Role</i>                                                     | <i>Date</i>   | <i>Management Notes</i> |
|-----------------------------------------------------------------------|---------------|-------------------------|
| Eddrika Russell, ASH Staff                                            | June 26, 2020 |                         |
| Menaka Pai, MD, Ex Officio ASH<br>Guideline Oversight<br>Subcommittee | July 14, 2020 | Participation approved  |

## Section 4. Disclosures and Attestations During Participation

For ASH Internal Use Only

| <i>Disclosure or attestation</i> | <i>Date</i>      | <i>Reviewed by</i>     | <i>Management Notes</i>                                                      |
|----------------------------------|------------------|------------------------|------------------------------------------------------------------------------|
| Attestation                      | June 29, 2021    | Russell                | Dr. Wiercioch agreed to continue to adhere to the policies described herein. |
| Attestation                      | October 2, 2021  | Russell                | Dr. Wiercioch agreed to continue to adhere to the policies described herein. |
| Attestation                      | January 18, 2022 | Deion Smith, ASH Staff | Dr. Wiercioch agreed to continue to adhere to the policies described herein. |
|                                  | April 2, 2022    | Smith                  | Dr. Wiercioch confirmed that all information in this form is correct.        |

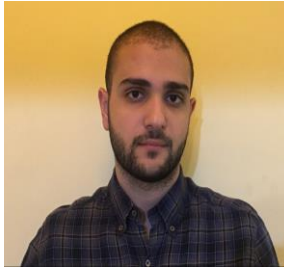

Reyad Al Jabiri, MD

Medical Doctor

University of Jordan

Amman, Jordan

---

## Project

ASH Clinical Practice Guidelines on Anticoagulation in Patients with COVID-19

## Role

Review Team Member

## Profile

Dr. Reyad Al Jabiri is a medical doctor at the Shmisani hospital. He has always been passionate about medicine and began his journey in medicine in 2015 after finishing high school, enjoying every step of the way, and trying to learn from every opportunity in his life, focusing on being the better version of himself with every day to be able to help others (patients and colleagues), trying to expand his experience and knowledge by participating in research, learning from his teachers and dreaming about continuing the rest of his journey in medicine in the other half of the world.

[September 14, 2020 profile approved by Dr. Reyad Al Jabiri]

## Section 1. Disclosures Prior to Participation

### Definitions

|                                             |                                                                                                                                                                                                                                                                                                                                                                                                                                                                                                                                                                                                                                                             |
|---------------------------------------------|-------------------------------------------------------------------------------------------------------------------------------------------------------------------------------------------------------------------------------------------------------------------------------------------------------------------------------------------------------------------------------------------------------------------------------------------------------------------------------------------------------------------------------------------------------------------------------------------------------------------------------------------------------------|
| <b><i>Conflict of interest</i></b>          | A situation in which a reasonable person would consider that an individual’s judgments or actions regarding any aspect of the guideline development process is, or could be perceived to be, influenced by an outside interest                                                                                                                                                                                                                                                                                                                                                                                                                              |
| <b><i>Financial interest</i></b>            | A position or relationship held by an individual that offers potential gain or loss of monetary value, such as employment, stock ownership, payment for services, or gifts given with the expectation of reciprocity                                                                                                                                                                                                                                                                                                                                                                                                                                        |
| <b><i>Direct financial interest</i></b>     | A financial interest that is owned by the individual or received directly by the individual                                                                                                                                                                                                                                                                                                                                                                                                                                                                                                                                                                 |
| <b><i>Indirect financial interest</i></b>   | A financial interest that is owned or received via an intermediary, e.g., research funding to an individual received through the individual’s academic institution                                                                                                                                                                                                                                                                                                                                                                                                                                                                                          |
| <b><i>For-profit healthcare company</i></b> | “A for-profit entity that develops, produces, markets, or distributes drugs, devices, services, or therapies used to diagnose, treat, monitor, manage, and alleviate health conditions. This definition is not intended to include non-profit entities, entities outside of the healthcare sector, or entities through which physicians provide clinical services directly to patients” (Council of Medical Specialty Societies’ “Code for Interactions With Industry” 2015). This definition is furthermore not viewed by ASH to include companies that provide accredited continuing medical education or that publish scientific or educational content. |

### Part A. Direct Financial Interests

#### Employment With For-Profit Healthcare Companies

1. Are you currently or in the past 24 months have you been an employee of any **for-profit healthcare company**?

No

Yes, as described below:

Add rows as needed for each employment relationship.

| <i>Company</i> | <i>Description</i> | <i>End Date</i> | <i>For ASH Internal Use</i> |
|----------------|--------------------|-----------------|-----------------------------|
|                |                    |                 |                             |

### Equity in For-Profit Healthcare Companies

2. Do you currently or in the past 24 months have you had equity in any **for-profit healthcare company**? Equity includes stock, stock options, and other ownership interests but excludes diversified mutual fund shares.

No

Yes, as described below:

Add rows as needed for each equity interest.

| <i>Company</i> | <i>Description</i> | <i>Date Divested</i> | <i>For ASH Internal Use</i> |
|----------------|--------------------|----------------------|-----------------------------|
|                |                    |                      |                             |

### Healthcare-Related Patents, Royalties, and Other Intellectual Property

3. Do you currently or in the past 24 months have you owned patents for or received royalties from any intellectual property or product used to diagnose, treat, monitor, manage, or alleviate health conditions?

No

Yes, as described below:

Add rows as needed for each patent or royalty interest.

| <i>Company</i> | <i>Description</i> | <i>Date Divested</i> | <i>For ASH Internal Use</i> |
|----------------|--------------------|----------------------|-----------------------------|
|                |                    |                      |                             |

### Personal Income or Other Direct Transfers of Value From For-Profit Healthcare Companies

4. Do you currently or in the past 24 months have you received any personal income or other direct transfers of value (e.g., honoraria, gifts, travel support, meeting registration, meals) from any **for-profit healthcare company**?

No

Yes, as described below:

Column 1 Name the company.

Column 2 Describe the activity for which you received the income or other transfer of value, e.g., research, consultancy, speakers bureau involvement, service on an advisory committee or board, expert testimony.

Column 3 Indicate when the activity ended, if applicable. (If the activity has not yet ended, indicate "current" or "ongoing.")

Add rows as needed for each activity.

| <i>Company</i> | <i>Description</i> | <i>End Date</i> | <i>For ASH Internal Use</i> |
|----------------|--------------------|-----------------|-----------------------------|
|                |                    |                 |                             |

#### My Partner's or Spouse's Interests

5. Currently or in the past 24 months has *your partner or spouse* had any of the interests or relationships described in questions 1-4?

No

Yes, as described below:

Add rows as needed for each interest.

| <i>Company</i> | <i>Description</i> | <i>End Date</i> | <i>For ASH Internal Use</i> |
|----------------|--------------------|-----------------|-----------------------------|
|                |                    |                 |                             |

#### Other Relevant Direct Financial Interests

6. Do you have other current or recent (within the past 24 months) **direct financial interests** with any institution, organization, entity or individual that could be relevant to the work of developing these guidelines?

No

Yes

If yes, please explain:

## Part B. Indirect Financial Interests

### Institutional Research Funded by For-Profit Healthcare Companies

1. Through your institution, do you currently or in the past 24 months have you been involved in research funded or supported (e.g., in kind support, such as provision of a study drug) by any **for-profit healthcare company**?

No

Yes, as described below:

Column 1 Name the company funding or supporting the research.

Column 2 Briefly describe the research project.

Column 3 Describe your role: (a) national or overall principal investigator, (b) member of a steering committee of a study that does not have a principal investigator, (c) site or local investigator. If other than these options, please describe.

Column 4 Indicate when your involvement ended, if applicable. (If your involvement has not yet ended, indicate “current” or “ongoing.”)

Add rows as needed for each research project.

| <i>Company</i> | <i>Description of Research</i> | <i>My Role</i> | <i>End Date</i> | <i>For ASH Internal Use</i> |
|----------------|--------------------------------|----------------|-----------------|-----------------------------|
|                |                                |                |                 |                             |

### Paid and Volunteer Activities for Organizations Supported by For-Profit Healthcare Companies

2. Do you currently or in the past 24 months have you been involved in any volunteer or paid work for an organization that is wholly or partially funded by any **for-profit healthcare company**?

No

Yes, as described below:

Column 1 Name the organization. If known to you, describe any industry funding or support.

Column 2 Briefly describe your activity and role, e.g., employment, service on board of directors, other volunteer services.

Column 3 Indicate if your activity was paid or volunteered.

Column 4 Indicate when your involvement with the organization ended. (If your involvement has not yet ended, indicate “current” or “ongoing.”)

Add rows as needed for each organization.



| <i>Organization</i> | <i>Description and role</i> | <i>Paid or Unpaid?</i> | <i>End Date</i> | <i>For ASH Internal Use</i> |
|---------------------|-----------------------------|------------------------|-----------------|-----------------------------|
|                     |                             |                        |                 |                             |

Other Relevant Indirect Financial Interests

3. Do you have other **indirect financial interests** with any: (i) **for-profit healthcare** company; or (ii) other institution, organization, entity or individual that could be relevant to the work of developing these guidelines?

No

Yes

If yes, please explain:

## Part C. Relevant Other Interests That Are Not Mainly Financial

### Personal Beliefs

1. Do you have strongly held beliefs related to the topic of these guidelines?

No

Yes

If yes, please explain:

### Previously Published Opinions

2. Have you ever authored, coauthored, or publicly provided an opinion related to the topic of these guidelines, e.g., a clinical practice guideline, textbook, review article, meeting poster or presentation, grand rounds talk, letter to the editor?

No

Yes

If yes, what were those views and where were they made?

### Non-Industry Supported Research

3. Currently or in the past 24 months, have you been involved in a leadership role in any research project not already reported under Part B, Question 1, relevant to the topic of these guidelines, e.g., a research project funded by a nonprofit or governmental organization?

No

Yes, as described below:

Column 1 Name the entity funding the research.

Column 2 Describe the research project.

Column 3 Describe your role: (a) national or overall principal investigator, (b) member of a steering committee of a study that does not have a principal investigator, (c) site or local investigator. If other than these options, please describe.

Column 4 Indicate when your involvement ended, if applicable. (If your involvement has not yet ended, indicate "current" or "ongoing.")

Add rows as needed for each research project.

| <i>Funder</i> | <i>Description of Research</i> | <i>My Role</i> | <i>End Date</i> |
|---------------|--------------------------------|----------------|-----------------|
|               |                                |                |                 |

### Institutional Relationships

4. Could your compensation be affected by recommendations on this topic?

Don't know

No

Yes

If yes, please explain:

5. Do you generate revenues for your institution or employer by clinical activity, teaching, speaking, consulting, testifying, writing, or otherwise sharing your knowledge or opinions about this guideline topic?

Don't know

No

Yes

If yes, please explain:

6. Could your institution benefit or be harmed by guidelines on this topic?

Don't know

No

Yes

If yes, please explain:

### Career Advancement

7. How would you characterize the support you would receive from your primary mentor, institution, or other entities if your work on this panel or authorship of these guidelines generated a strong reaction from peers outside your institution?

Helpful

### Involvement in Organizations With Relevant Policies, Positions, or Guidelines

8. Are you involved as an employee, volunteer, or member of any organization that has published or to your knowledge is currently developing policies, positions, or guidelines relevant to these ASH

guidelines, e.g., clinical practice guidelines, appropriate use criteria, expert consensus statement, mission statement, advocacy statement, amicus brief, or legislature or legal testimony?

No

Yes, as described below:

Column 1 Name the organization.

Column 2 Describe or reference the relevant policy, position, or guidelines.

Column 3 Describe your role with the organization, including your involvement in developing, disseminating, or implementing the relevant policy, position, or guidelines.

Add rows as needed for each organization.

| <i>Organization</i> | <i>Relevant Policy Position</i> | <i>Your Role</i> |
|---------------------|---------------------------------|------------------|
|                     |                                 |                  |

#### Clinical Practice

9. Do you see patients clinically?

No

Yes

If yes, what is your primary specialty or subspecialty?

If yes, do you prescribe or otherwise recommend clinical interventions (e.g., screening or diagnostic tests, evaluations, treatments, procedures) that may be addressed by these guidelines?

No

Yes

If yes, please explain:

#### Other

10. Do you have other nonfinancial interests or relationships not described above that could be relevant to the work of developing these guidelines?

No

Yes

If yes, please describe:

#### Expected Interests

11. Do you expect to enter into, within the next 24 months, any new **financial or nonfinancial interests** not described above that could be relevant to the work of developing these guidelines?

No

Yes

If yes, please describe:

## Section 2. Attestation of Compliance With Conflict of Interest Policies

In consideration of my participation on these guidelines, I hereby certify and agree that:

| <i>Policy</i>                                                                                                                                                                                                                                                                                                                                                                                                                                                                                                                                                                                                                                                                                                                                                                                                                                                                                                                                                                                                                                                                                                                                                                                                             | <i>Initials</i> |
|---------------------------------------------------------------------------------------------------------------------------------------------------------------------------------------------------------------------------------------------------------------------------------------------------------------------------------------------------------------------------------------------------------------------------------------------------------------------------------------------------------------------------------------------------------------------------------------------------------------------------------------------------------------------------------------------------------------------------------------------------------------------------------------------------------------------------------------------------------------------------------------------------------------------------------------------------------------------------------------------------------------------------------------------------------------------------------------------------------------------------------------------------------------------------------------------------------------------------|-----------------|
| I have reviewed and understand the ASH Principles and Policies on Conflict of Interest published on the ASH website at <a href="https://www.hematology.org/about/governance/conflict-of-interest">https://www.hematology.org/about/governance/conflict-of-interest</a> including the special Policy on Management of Conflicts in the Development of Clinical Practice Guidelines (“ASH Policy”).                                                                                                                                                                                                                                                                                                                                                                                                                                                                                                                                                                                                                                                                                                                                                                                                                         | R.N.A           |
| I have disclosed and will continue to disclose completely all potential conflicts of interest for myself and for my partner or spouse, to the best of my ability and knowledge, in accordance with ASH Policy and this Disclosure Form.                                                                                                                                                                                                                                                                                                                                                                                                                                                                                                                                                                                                                                                                                                                                                                                                                                                                                                                                                                                   | R.N.A           |
| To ensure completeness and avoid discrepancies, I have checked and periodically will check my financial disclosures against other published information, including from the U.S. Centers for Medicare and Medicaid Services’ Open Payments database (or similar non-U.S. database) and explain any discrepant information.                                                                                                                                                                                                                                                                                                                                                                                                                                                                                                                                                                                                                                                                                                                                                                                                                                                                                                | R.N.A           |
| <p>Until submission of the guidelines for publication, I understand and agree that without special exception from ASH, any of the following will disqualify me from continued participation and I will not enter into:</p> <ul style="list-style-type: none"> <li>• Any <b>direct financial interest</b> of myself or my partner or spouse in any <b>for-profit healthcare company or companies</b>, if such interests in aggregate may be reasonably valued to be &gt;\$5,000/year, regardless of relevance to the guidelines</li> <li>• Any noneducational speaking by myself on behalf of any <b>for-profit healthcare company</b> (e.g., service on a company “speakers bureau”), regardless of relevance to the guidelines</li> <li>• Consulting or advising about the marketing of products by any <b>for-profit healthcare company</b> (e.g., service on a company “advisory board”), regardless of relevance to the guidelines</li> <li>• Simultaneous participation on guidelines by another organization on the same topic</li> <li>• Any <i>undisclosed</i> financial interest in any <b>for-profit healthcare company</b> occurring in the 24 months prior to my participation on these guidelines</li> </ul> | R.N.A           |
| I understand that if a disqualifying interest is reported, the usual course of action will be dismissal from participation and acknowledgment within the guideline publication rather than authorship.                                                                                                                                                                                                                                                                                                                                                                                                                                                                                                                                                                                                                                                                                                                                                                                                                                                                                                                                                                                                                    | R.N.A           |
| At regular intervals during the guideline development process, as determined by ASH, I will review my information in this Disclosure Form; provide updated disclosures; and, if requested, attest that I do not have any interests that should disqualify my participation.                                                                                                                                                                                                                                                                                                                                                                                                                                                                                                                                                                                                                                                                                                                                                                                                                                                                                                                                               | R.N.A           |

|                                                                                                                                                                                                                             |       |
|-----------------------------------------------------------------------------------------------------------------------------------------------------------------------------------------------------------------------------|-------|
| I agree to publish with the guidelines my complete disclosures, this agreement, and future attestations.                                                                                                                    | R.N.A |
| I understand that for 1 year following initial publication of the guidelines, I am encouraged by ASH to avoid new conflicts of interest that could reduce trust in the guidelines, in accordance with my own best judgment. | R.N.A |

Agreed by [Reyad Al jabiri]

Date [28/8/2020]

### Section 3. ASH Review Prior to Participation

For ASH Internal Use Only

| <i>Name, Role</i>                                                     | <i>Date</i>     | <i>Management Notes</i> |
|-----------------------------------------------------------------------|-----------------|-------------------------|
| Eddrika Russell, ASH staff                                            | August 31, 2020 |                         |
| Menaka Pai, MD, ex officio ASH<br>Guideline Oversight<br>Subcommittee | August 31, 2020 | Participation approved  |



## Section 4. Disclosures and Attestations During Participation

For ASH Internal Use Only

| <i>Disclosure or attestation</i> | <i>Date</i>      | <i>Reviewed by</i>           | <i>Management Notes</i>                                                            |
|----------------------------------|------------------|------------------------------|------------------------------------------------------------------------------------|
| Attestation                      | August 3, 2021   | Russell                      | Dr. Reyad Al Jabiri agreed to continue to adhere to the policies described herein. |
| Attestation                      | October 6, 2021  | Russell                      | Dr. Reyad Al Jabiri agreed to continue to adhere to the policies described herein. |
| Attestation                      | January 19, 2022 | Kendall Alexander, ASH staff | Dr. Reyad Al Jabiri agreed to continue to adhere to the policies described herein. |
|                                  | April 11, 2022   | Deion Smith, ASH Staff       | Dr. Reyad Al Jabiri confirmed that all information in this form is correct.        |



ASH Clinical Practice Guidelines  
Participant Information

---

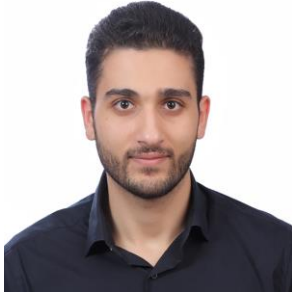

Yazan Al Jabiri, MD

Internal Medicine Resident

Lincoln Medical Center

Bronx, New York, United States

---

### Project

ASH Clinical Practice Guidelines on Anticoagulation in Patients with COVID-19

### Role

Review Team Member

### Profile

Dr. Yazan Al Jabiri completed medical school at Jordan University of Science and Technology. He is currently completing an internal medicine residency at Lincoln Medical Center in New York. Dr. Al Jabiri has experience working on systematic reviews in different topics and has participated in the different stages of systematic review formation processes. He values hard work and self-improvement and believes that every day you should learn something new to be the better version of yourself and to be able to make a difference in the world.

[September 13, 2020 profile approved by Dr. Al Jabiri]

## Section 1. Disclosures Prior to Participation

### Definitions

**Conflict of interest**

A situation in which a reasonable person would consider that an individual’s judgments or actions regarding any aspect of the guideline development process is, or could be perceived to be, influenced by an outside interest

**Financial interest**

A position or relationship held by an individual that offers potential gain or loss of monetary value, such as employment, stock ownership, payment for services, or gifts given with the expectation of reciprocity

**Direct financial interest**

A financial interest that is owned by the individual or received directly by the individual

**Indirect financial interest**

A financial interest that is owned or received via an intermediary, e.g., research funding to an individual received through the individual’s academic institution

**For-profit healthcare company**

“A for-profit entity that develops, produces, markets, or distributes drugs, devices, services, or therapies used to diagnose, treat, monitor, manage, and alleviate health conditions. This definition is not intended to include non-profit entities, entities outside of the healthcare sector, or entities through which physicians provide clinical services directly to patients” (Council of Medical Specialty Societies’ “Code for Interactions With Industry” 2015). This definition is furthermore not viewed by ASH to include companies that provide accredited continuing medical education or that publish scientific or educational content.

### Part A. Direct Financial Interests

#### Employment With For-Profit Healthcare Companies

1. Are you currently or in the past 24 months have you been an employee of any **for-profit healthcare company**?

No

Yes, as described below:

Add rows as needed for each employment relationship.

| <i>Company</i> | <i>Description</i> | <i>End Date</i> | <i>For ASH Internal Use</i> |
|----------------|--------------------|-----------------|-----------------------------|
|                |                    |                 |                             |

### Equity in For-Profit Healthcare Companies

2. Do you currently or in the past 24 months have you had equity in any **for-profit healthcare company**? Equity includes stock, stock options, and other ownership interests but excludes diversified mutual fund shares.

No

Yes, as described below:

Add rows as needed for each equity interest.

| <i>Company</i> | <i>Description</i> | <i>Date Divested</i> | <i>For ASH Internal Use</i> |
|----------------|--------------------|----------------------|-----------------------------|
|                |                    |                      |                             |

### Healthcare-Related Patents, Royalties, and Other Intellectual Property

3. Do you currently or in the past 24 months have you owned patents for or received royalties from any intellectual property or product used to diagnose, treat, monitor, manage, or alleviate health conditions?

No

Yes, as described below:

Add rows as needed for each patent or royalty interest.

| <i>Company</i> | <i>Description</i> | <i>Date Divested</i> | <i>For ASH Internal Use</i> |
|----------------|--------------------|----------------------|-----------------------------|
|                |                    |                      |                             |

### Personal Income or Other Direct Transfers of Value From For-Profit Healthcare Companies

4. Do you currently or in the past 24 months have you received any personal income or other direct transfers of value (e.g., honoraria, gifts, travel support, meeting registration, meals) from any **for-profit healthcare company**?

No

Yes, as described below:

Column 1 Name the company.

Column 2 Describe the activity for which you received the income or other transfer of value, e.g., research, consultancy, speakers bureau involvement, service on an advisory committee or board, expert testimony.

Column 3 Indicate when the activity ended, if applicable. (If the activity has not yet ended, indicate "current" or "ongoing.")

Add rows as needed for each activity.

| <i>Company</i> | <i>Description</i> | <i>End Date</i> | <i>For ASH Internal Use</i> |
|----------------|--------------------|-----------------|-----------------------------|
|                |                    |                 |                             |

#### My Partner's or Spouse's Interests

5. Currently or in the past 24 months has *your partner or spouse* had any of the interests or relationships described in questions 1-4?

No

Yes, as described below:

Add rows as needed for each interest.

| <i>Company</i> | <i>Description</i> | <i>End Date</i> | <i>For ASH Internal Use</i> |
|----------------|--------------------|-----------------|-----------------------------|
|                |                    |                 |                             |

#### Other Relevant Direct Financial Interests

6. Do you have other current or recent (within the past 24 months) **direct financial interests** with any institution, organization, entity or individual that could be relevant to the work of developing these guidelines?

No

Yes

If yes, please explain:

## Part B. Indirect Financial Interests

### Institutional Research Funded by For-Profit Healthcare Companies

1. Through your institution, do you currently or in the past 24 months have you been involved in research funded or supported (e.g., in kind support, such as provision of a study drug) by any **for-profit healthcare company**?

No

Yes, as described below:

Column 1 Name the company funding or supporting the research.

Column 2 Briefly describe the research project.

Column 3 Describe your role: (a) national or overall principal investigator, (b) member of a steering committee of a study that does not have a principal investigator, (c) site or local investigator. If other than these options, please describe.

Column 4 Indicate when your involvement ended, if applicable. (If your involvement has not yet ended, indicate “current” or “ongoing.”)

Add rows as needed for each research project.

| <i>Company</i> | <i>Description of Research</i> | <i>My Role</i> | <i>End Date</i> | <i>For ASH Internal Use</i> |
|----------------|--------------------------------|----------------|-----------------|-----------------------------|
|                |                                |                |                 |                             |

### Paid and Volunteer Activities for Organizations Supported by For-Profit Healthcare Companies

2. Do you currently or in the past 24 months have you been involved in any volunteer or paid work for an organization that is wholly or partially funded by any **for-profit healthcare company**?

No

Yes, as described below:

Column 1 Name the organization. If known to you, describe any industry funding or support.

Column 2 Briefly describe your activity and role, e.g., employment, service on board of directors, other volunteer services.

Column 3 Indicate if your activity was paid or volunteered.

Column 4 Indicate when your involvement with the organization ended. (If your involvement has not yet ended, indicate “current” or “ongoing.”)

Add rows as needed for each organization.

| <i>Organization</i> | <i>Description and role</i> | <i>Paid or Unpaid?</i> | <i>End Date</i> | <i>For ASH Internal Use</i> |
|---------------------|-----------------------------|------------------------|-----------------|-----------------------------|
|                     |                             |                        |                 |                             |

Other Relevant Indirect Financial Interests

3. Do you have other **indirect financial interests** with any: (i) **for-profit healthcare** company; or (ii) other institution, organization, entity or individual that could be relevant to the work of developing these guidelines?

No

Yes

If yes, please explain:

## Part C. Relevant Other Interests That Are Not Mainly Financial

### Personal Beliefs

1. Do you have strongly held beliefs related to the topic of these guidelines?

No

Yes

If yes, please explain:

### Previously Published Opinions

2. Have you ever authored, coauthored, or publicly provided an opinion related to the topic of these guidelines, e.g., a clinical practice guideline, textbook, review article, meeting poster or presentation, grand rounds talk, letter to the editor?

No

Yes

If yes, what were those views and where were they made?

### Non-Industry Supported Research

3. Currently or in the past 24 months, have you been involved in a leadership role in any research project not already reported under Part B, Question 1, relevant to the topic of these guidelines, e.g., a research project funded by a nonprofit or governmental organization?

No

Yes, as described below:

Column 1 Name the entity funding the research.

Column 2 Describe the research project.

Column 3 Describe your role: (a) national or overall principal investigator, (b) member of a steering committee of a study that does not have a principal investigator, (c) site or local investigator. If other than these options, please describe.

Column 4 Indicate when your involvement ended, if applicable. (If your involvement has not yet ended, indicate "current" or "ongoing.")

Add rows as needed for each research project.

| <i>Funder</i> | <i>Description of Research</i> | <i>My Role</i> | <i>End Date</i> |
|---------------|--------------------------------|----------------|-----------------|
|               |                                |                |                 |



### Institutional Relationships

4. Could your compensation be affected by recommendations on this topic?

Don't know

No

Yes

If yes, please explain:

5. Do you generate revenues for your institution or employer by clinical activity, teaching, speaking, consulting, testifying, writing, or otherwise sharing your knowledge or opinions about this guideline topic?

Don't know

No

Yes

If yes, please explain:

6. Could your institution benefit or be harmed by guidelines on this topic?

Don't know

No

Yes

If yes, please explain:

### Career Advancement

7. How would you characterize the support you would receive from your primary mentor, institution, or other entities if your work on this panel or authorship of these guidelines generated a strong reaction from peers outside your institution?

Neutral support

### Involvement in Organizations With Relevant Policies, Positions, or Guidelines

8. Are you involved as an employee, volunteer, or member of any organization that has published or to your knowledge is currently developing policies, positions, or guidelines relevant to these ASH

guidelines, e.g., clinical practice guidelines, appropriate use criteria, expert consensus statement, mission statement, advocacy statement, amicus brief, or legislature or legal testimony?

No

Yes, as described below:

Column 1 Name the organization.

Column 2 Describe or reference the relevant policy, position, or guidelines.

Column 3 Describe your role with the organization, including your involvement in developing, disseminating, or implementing the relevant policy, position, or guidelines.

Add rows as needed for each organization.

| <i>Organization</i> | <i>Relevant Policy Position</i> | <i>Your Role</i> |
|---------------------|---------------------------------|------------------|
|                     |                                 |                  |

#### Clinical Practice

9. Do you see patients clinically?

No

Yes

If yes, what is your primary specialty or subspecialty?

Internal medicine

If yes, do you prescribe or otherwise recommend clinical interventions (e.g., screening or diagnostic tests, evaluations, treatments, procedures) that may be addressed by these guidelines?

No

Yes

If yes, please explain:

#### Other

10. Do you have other nonfinancial interests or relationships not described above that could be relevant to the work of developing these guidelines?

No

Yes

If yes, please describe:

#### Expected Interests

11. Do you expect to enter into, within the next 24 months, any new **financial or nonfinancial interests** not described above that could be relevant to the work of developing these guidelines?

No

Yes

If yes, please describe:

## Section 2. Attestation of Compliance With Conflict of Interest Policies

In consideration of my participation on these guidelines, I hereby certify and agree that:

| <i>Policy</i>                                                                                                                                                                                                                                                                                                                                                                                                                                                                                                                                                                                                                                                                                                                                                                                                                                                                                                                                                                                                                                                                                                                                                                                                             | <i>Initials</i> |
|---------------------------------------------------------------------------------------------------------------------------------------------------------------------------------------------------------------------------------------------------------------------------------------------------------------------------------------------------------------------------------------------------------------------------------------------------------------------------------------------------------------------------------------------------------------------------------------------------------------------------------------------------------------------------------------------------------------------------------------------------------------------------------------------------------------------------------------------------------------------------------------------------------------------------------------------------------------------------------------------------------------------------------------------------------------------------------------------------------------------------------------------------------------------------------------------------------------------------|-----------------|
| I have reviewed and understand the ASH Principles and Policies on Conflict of Interest published on the ASH website at <a href="https://www.hematology.org/about/governance/conflict-of-interest">https://www.hematology.org/about/governance/conflict-of-interest</a> including the special Policy on Management of Conflicts in the Development of Clinical Practice Guidelines (“ASH Policy”).                                                                                                                                                                                                                                                                                                                                                                                                                                                                                                                                                                                                                                                                                                                                                                                                                         | YA              |
| I have disclosed and will continue to disclose completely all potential conflicts of interest for myself and for my partner or spouse, to the best of my ability and knowledge, in accordance with ASH Policy and this Disclosure Form.                                                                                                                                                                                                                                                                                                                                                                                                                                                                                                                                                                                                                                                                                                                                                                                                                                                                                                                                                                                   | YA              |
| To ensure completeness and avoid discrepancies, I have checked and periodically will check my financial disclosures against other published information, including from the U.S. Centers for Medicare and Medicaid Services’ Open Payments database (or similar non-U.S. database) and explain any discrepant information.                                                                                                                                                                                                                                                                                                                                                                                                                                                                                                                                                                                                                                                                                                                                                                                                                                                                                                | YA              |
| <p>Until submission of the guidelines for publication, I understand and agree that without special exception from ASH, any of the following will disqualify me from continued participation and I will not enter into:</p> <ul style="list-style-type: none"> <li>• Any <b>direct financial interest</b> of myself or my partner or spouse in any <b>for-profit healthcare company or companies</b>, if such interests in aggregate may be reasonably valued to be &gt;\$5,000/year, regardless of relevance to the guidelines</li> <li>• Any noneducational speaking by myself on behalf of any <b>for-profit healthcare company</b> (e.g., service on a company “speakers bureau”), regardless of relevance to the guidelines</li> <li>• Consulting or advising about the marketing of products by any <b>for-profit healthcare company</b> (e.g., service on a company “advisory board”), regardless of relevance to the guidelines</li> <li>• Simultaneous participation on guidelines by another organization on the same topic</li> <li>• Any <i>undisclosed</i> financial interest in any <b>for-profit healthcare company</b> occurring in the 24 months prior to my participation on these guidelines</li> </ul> | YA              |
| I understand that if a disqualifying interest is reported, the usual course of action will be dismissal from participation and acknowledgment within the guideline publication rather than authorship.                                                                                                                                                                                                                                                                                                                                                                                                                                                                                                                                                                                                                                                                                                                                                                                                                                                                                                                                                                                                                    | YA              |
| At regular intervals during the guideline development process, as determined by ASH, I will review my information in this Disclosure Form; provide updated disclosures; and, if requested, attest that I do not have any interests that should disqualify my participation.                                                                                                                                                                                                                                                                                                                                                                                                                                                                                                                                                                                                                                                                                                                                                                                                                                                                                                                                               | YA              |

|                                                                                                                                                                                                                             |    |
|-----------------------------------------------------------------------------------------------------------------------------------------------------------------------------------------------------------------------------|----|
| I agree to publish with the guidelines my complete disclosures, this agreement, and future attestations.                                                                                                                    | YA |
| I understand that for 1 year following initial publication of the guidelines, I am encouraged by ASH to avoid new conflicts of interest that could reduce trust in the guidelines, in accordance with my own best judgment. | YA |

Agreed by YAZAN AL JABIRI

Date 08/28/2020

### Section 3. ASH Review Prior to Participation

For ASH Internal Use Only

| <i>Name, Role</i>                                                     | <i>Date</i>     | <i>Management Notes</i> |
|-----------------------------------------------------------------------|-----------------|-------------------------|
| Eddrika Russell, ASH staff                                            | August 31, 2020 |                         |
| Menaka Pai, MD, ex officio ASH<br>Guideline Oversight<br>Subcommittee | August 31, 2020 | Participation approved  |

## Section 4. Disclosures and Attestations During Participation

For ASH Internal Use Only

| <i>Disclosure or attestation</i> | <i>Date</i>      | <i>Reviewed by</i>     | <i>Management Notes</i>                                                      |
|----------------------------------|------------------|------------------------|------------------------------------------------------------------------------|
| Disclosure                       | July 21, 2021    | Russell                | Dr. Al Jabiri provided an answer of 'no' to question 4, page 9.              |
| Attestation                      | July 26, 2021    | Russell                | Dr. Al Jabiri agreed to continue to adhere to the policies described herein. |
| Attestation                      | October 5, 2021  | Russell                | Dr. Al Jabiri agreed to continue to adhere to the policies described herein. |
| Attestation                      | January 28, 2022 | Deion Smith, ASH Staff | Dr. Al Jabiri agreed to continue to adhere to the policies described herein. |
|                                  | April 3, 2022    | Smith                  | Dr. Al Jabiri confirmed that all information in the form is correct.         |

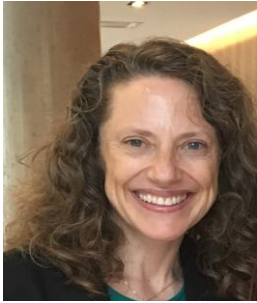

Angela M, Barbara, BSc, MSc, PhD

Research Coordinator

Department of Health Research Methods, Evidence, and Impact

Health Sciences Centre, McMaster University

Hamilton, Ontario, Canada

---

## Project

ASH Clinical Practice Guidelines on Anticoagulation in Patients with COVID-19

## Role

Review Team Member

## Profile

Dr. Barbara obtained her PhD in Health Research Methodology from the previously named Department of Clinical Epidemiology and Statistics at McMaster University. She is a Research Coordinator with over 20 years of experience in health research, having worked in many areas of health, including mental health, addictions, child maltreatment, prostate cancer, influenza, and hemophilia; and with specific populations, including women, adolescents with addictions, lesbians and gay men, transgender and transsexual persons, Hutterites living in the Canadian prairies, and new Canadian immigrants.

[July 21, 2021 profile approved by Dr. Barbara]



## Section 1. Disclosures Prior to Participation

### Definitions

**Conflict of interest**

A situation in which a reasonable person would consider that an individual’s judgments or actions regarding any aspect of the guideline development process is, or could be perceived to be, influenced by an outside interest

**Financial interest**

A position or relationship held by an individual that offers potential gain or loss of monetary value, such as employment, stock ownership, payment for services, or gifts given with the expectation of reciprocity

**Direct financial interest**

A financial interest that is owned by the individual or received directly by the individual

**Indirect financial interest**

A financial interest that is owned or received via an intermediary, e.g., research funding to an individual received through the individual’s academic institution

**For-profit healthcare company**

“A for-profit entity that develops, produces, markets, or distributes drugs, devices, services, or therapies used to diagnose, treat, monitor, manage, and alleviate health conditions. This definition is not intended to include non-profit entities, entities outside of the healthcare sector, or entities through which physicians provide clinical services directly to patients” (Council of Medical Specialty Societies’ “Code for Interactions With Industry” 2015). This definition is furthermore not viewed by ASH to include companies that provide accredited continuing medical education or that publish scientific or educational content.

### Part A. Direct Financial Interests

#### Employment With For-Profit Healthcare Companies

1. Are you currently or in the past 24 months have you been an employee of any **for-profit healthcare company**?

No

Yes, as described below:

Add rows as needed for each employment relationship.

| <i>Company</i> | <i>Description</i> | <i>End Date</i> | <i>For ASH Internal Use</i> |
|----------------|--------------------|-----------------|-----------------------------|
|                |                    |                 |                             |

### Equity in For-Profit Healthcare Companies

2. Do you currently or in the past 24 months have you had equity in any **for-profit healthcare company**? Equity includes stock, stock options, and other ownership interests but excludes diversified mutual fund shares.

No

Yes, as described below:

Add rows as needed for each equity interest.

| <i>Company</i> | <i>Description</i> | <i>Date Divested</i> | <i>For ASH Internal Use</i> |
|----------------|--------------------|----------------------|-----------------------------|
|                |                    |                      |                             |

### Healthcare-Related Patents, Royalties, and Other Intellectual Property

3. Do you currently or in the past 24 months have you owned patents for or received royalties from any intellectual property or product used to diagnose, treat, monitor, manage, or alleviate health conditions?

No

Yes, as described below:

Add rows as needed for each patent or royalty interest.

| <i>Company</i> | <i>Description</i> | <i>Date Divested</i> | <i>For ASH Internal Use</i> |
|----------------|--------------------|----------------------|-----------------------------|
|                |                    |                      |                             |

### Personal Income or Other Direct Transfers of Value From For-Profit Healthcare Companies

4. Do you currently or in the past 24 months have you received any personal income or other direct transfers of value (e.g., honoraria, gifts, travel support, meeting registration, meals) from any **for-profit healthcare company**?

No

Yes, as described below:

Column 1 Name the company.

Column 2 Describe the activity for which you received the income or other transfer of value, e.g., research, consultancy, speakers bureau involvement, service on an advisory committee or board, expert testimony.

Column 3 Indicate when the activity ended, if applicable. (If the activity has not yet ended, indicate "current" or "ongoing.")

Add rows as needed for each activity.

| <i>Company</i> | <i>Description</i> | <i>End Date</i> | <i>For ASH Internal Use</i> |
|----------------|--------------------|-----------------|-----------------------------|
|                |                    |                 |                             |

#### My Partner's or Spouse's Interests

5. Currently or in the past 24 months has *your partner or spouse* had any of the interests or relationships described in questions 1-4?

No

Yes, as described below:

Add rows as needed for each interest.

| <i>Company</i> | <i>Description</i> | <i>End Date</i> | <i>For ASH Internal Use</i> |
|----------------|--------------------|-----------------|-----------------------------|
|                |                    |                 |                             |

#### Other Relevant Direct Financial Interests

6. Do you have other current or recent (within the past 24 months) **direct financial interests** with any institution, organization, entity or individual that could be relevant to the work of developing these guidelines?

No

Yes

If yes, please explain:

## Part B. Indirect Financial Interests

### Institutional Research Funded by For-Profit Healthcare Companies

1. Through your institution, do you currently or in the past 24 months have you been involved in research funded or supported (e.g., in kind support, such as provision of a study drug) by any **for-profit healthcare company**?

No

Yes, as described below:

Column 1 Name the company funding or supporting the research.

Column 2 Briefly describe the research project.

Column 3 Describe your role: (a) national or overall principal investigator, (b) member of a steering committee of a study that does not have a principal investigator, (c) site or local investigator. If other than these options, please describe.

Column 4 Indicate when your involvement ended, if applicable. (If your involvement has not yet ended, indicate “current” or “ongoing.”)

Add rows as needed for each research project.

| <i>Company</i> | <i>Description of Research</i> | <i>My Role</i> | <i>End Date</i> | <i>For ASH Internal Use</i> |
|----------------|--------------------------------|----------------|-----------------|-----------------------------|
|                |                                |                |                 |                             |

### Paid and Volunteer Activities for Organizations Supported by For-Profit Healthcare Companies

2. Do you currently or in the past 24 months have you been involved in any volunteer or paid work for an organization that is wholly or partially funded by any **for-profit healthcare company**?

No

Yes, as described below:

Column 1 Name the organization. If known to you, describe any industry funding or support.

Column 2 Briefly describe your activity and role, e.g., employment, service on board of directors, other volunteer services.

Column 3 Indicate if your activity was paid or volunteered.

Column 4 Indicate when your involvement with the organization ended. (If your involvement has not yet ended, indicate “current” or “ongoing.”)

Add rows as needed for each organization.

| <i>Organization</i> | <i>Description and role</i> | <i>Paid or Unpaid?</i> | <i>End Date</i> | <i>For ASH Internal Use</i> |
|---------------------|-----------------------------|------------------------|-----------------|-----------------------------|
|                     |                             |                        |                 |                             |

Other Relevant Indirect Financial Interests

3. Do you have other **indirect financial interests** with any: (i) **for-profit healthcare** company; or (ii) other institution, organization, entity or individual that could be relevant to the work of developing these guidelines?

No

Yes

If yes, please explain:

## Part C. Relevant Other Interests That Are Not Mainly Financial

### Personal Beliefs

1. Do you have strongly held beliefs related to the topic of these guidelines?

No

Yes

If yes, please explain:

### Previously Published Opinions

2. Have you ever authored, coauthored, or publicly provided an opinion related to the topic of these guidelines, e.g., a clinical practice guideline, textbook, review article, meeting poster or presentation, grand rounds talk, letter to the editor?

No

Yes

If yes, what were those views and where were they made?

### Non-Industry Supported Research

3. Currently or in the past 24 months, have you been involved in a leadership role in any research project not already reported under Part B, Question 1, relevant to the topic of these guidelines, e.g., a research project funded by a nonprofit or governmental organization?

No

Yes, as described below:

Column 1 Name the entity funding the research.

Column 2 Describe the research project.

Column 3 Describe your role: (a) national or overall principal investigator, (b) member of a steering committee of a study that does not have a principal investigator, (c) site or local investigator. If other than these options, please describe.

Column 4 Indicate when your involvement ended, if applicable. (If your involvement has not yet ended, indicate "current" or "ongoing.")

Add rows as needed for each research project.

| <i>Funder</i> | <i>Description of Research</i> | <i>My Role</i> | <i>End Date</i> |
|---------------|--------------------------------|----------------|-----------------|
|               |                                |                |                 |

### Institutional Relationships

4. Could your compensation be affected by recommendations on this topic?

Don't know

No

Yes

If yes, please explain:

5. Do you generate revenues for your institution or employer by clinical activity, teaching, speaking, consulting, testifying, writing, or otherwise sharing your knowledge or opinions about this guideline topic?

Don't know

No

Yes

If yes, please explain:

6. Could your institution benefit or be harmed by guidelines on this topic?

Don't know

No

Yes

If yes, please explain:

### Career Advancement

7. How would you characterize the support you would receive from your primary mentor, institution, or other entities if your work on this panel or authorship of these guidelines generated a strong reaction from peers outside your institution?

### Involvement in Organizations With Relevant Policies, Positions, or Guidelines

8. Are you involved as an employee, volunteer, or member of any organization that has published or to your knowledge is currently developing policies, positions, or guidelines relevant to these ASH guidelines, e.g., clinical practice guidelines, appropriate use criteria, expert consensus statement, mission statement, advocacy statement, amicus brief, or legislature or legal testimony?

No

Yes, as described below:

Column 1 Name the organization.

Column 2 Describe or reference the relevant policy, position, or guidelines.

Column 3 Describe your role with the organization, including your involvement in developing, disseminating, or implementing the relevant policy, position, or guidelines.

Add rows as needed for each organization.

| <i>Organization</i> | <i>Relevant Policy Position</i> | <i>Your Role</i> |
|---------------------|---------------------------------|------------------|
|                     |                                 |                  |

#### Clinical Practice

9. Do you see patients clinically?

No

Yes

If yes, what is your primary specialty or subspecialty?

If yes, do you prescribe or otherwise recommend clinical interventions (e.g., screening or diagnostic tests, evaluations, treatments, procedures) that may be addressed by these guidelines?

No

Yes

If yes, please explain:

#### Other

10. Do you have other nonfinancial interests or relationships not described above that could be relevant to the work of developing these guidelines?

No

Yes

If yes, please describe:



### Expected Interests

11. Do you expect to enter into, within the next 24 months, any new **financial or nonfinancial interests** not described above that could be relevant to the work of developing these guidelines?

No

Yes

If yes, please describe:

## Section 2. Attestation of Compliance With Conflict of Interest Policies

In consideration of my participation on these guidelines, I hereby certify and agree that:

| <i>Policy</i>                                                                                                                                                                                                                                                                                                                                                                                                                                                                                                                                                                                                                                                                                                                                                                                                                                                                                                                                                                                                                                                                                                                                                                                                             | <i>Initials</i> |
|---------------------------------------------------------------------------------------------------------------------------------------------------------------------------------------------------------------------------------------------------------------------------------------------------------------------------------------------------------------------------------------------------------------------------------------------------------------------------------------------------------------------------------------------------------------------------------------------------------------------------------------------------------------------------------------------------------------------------------------------------------------------------------------------------------------------------------------------------------------------------------------------------------------------------------------------------------------------------------------------------------------------------------------------------------------------------------------------------------------------------------------------------------------------------------------------------------------------------|-----------------|
| I have reviewed and understand the ASH Principles and Policies on Conflict of Interest published on the ASH website at <a href="https://www.hematology.org/about/governance/conflict-of-interest">https://www.hematology.org/about/governance/conflict-of-interest</a> including the special Policy on Management of Conflicts in the Development of Clinical Practice Guidelines (“ASH Policy”).                                                                                                                                                                                                                                                                                                                                                                                                                                                                                                                                                                                                                                                                                                                                                                                                                         | AB              |
| I have disclosed and will continue to disclose completely all potential conflicts of interest for myself and for my partner or spouse, to the best of my ability and knowledge, in accordance with ASH Policy and this Disclosure Form.                                                                                                                                                                                                                                                                                                                                                                                                                                                                                                                                                                                                                                                                                                                                                                                                                                                                                                                                                                                   | AB              |
| To ensure completeness and avoid discrepancies, I have checked and periodically will check my financial disclosures against other published information, including from the U.S. Centers for Medicare and Medicaid Services’ Open Payments database (or similar non-U.S. database) and explain any discrepant information.                                                                                                                                                                                                                                                                                                                                                                                                                                                                                                                                                                                                                                                                                                                                                                                                                                                                                                | AB              |
| <p>Until submission of the guidelines for publication, I understand and agree that without special exception from ASH, any of the following will disqualify me from continued participation and I will not enter into:</p> <ul style="list-style-type: none"> <li>• Any <b>direct financial interest</b> of myself or my partner or spouse in any <b>for-profit healthcare company or companies</b>, if such interests in aggregate may be reasonably valued to be &gt;\$5,000/year, regardless of relevance to the guidelines</li> <li>• Any noneducational speaking by myself on behalf of any <b>for-profit healthcare company</b> (e.g., service on a company “speakers bureau”), regardless of relevance to the guidelines</li> <li>• Consulting or advising about the marketing of products by any <b>for-profit healthcare company</b> (e.g., service on a company “advisory board”), regardless of relevance to the guidelines</li> <li>• Simultaneous participation on guidelines by another organization on the same topic</li> <li>• Any <i>undisclosed</i> financial interest in any <b>for-profit healthcare company</b> occurring in the 24 months prior to my participation on these guidelines</li> </ul> | AB              |
| I understand that if a disqualifying interest is reported, the usual course of action will be dismissal from participation and acknowledgment within the guideline publication rather than authorship.                                                                                                                                                                                                                                                                                                                                                                                                                                                                                                                                                                                                                                                                                                                                                                                                                                                                                                                                                                                                                    | AB              |
| At regular intervals during the guideline development process, as determined by ASH, I will review my information in this Disclosure Form; provide updated disclosures; and, if requested, attest that I do not have any interests that should disqualify my participation.                                                                                                                                                                                                                                                                                                                                                                                                                                                                                                                                                                                                                                                                                                                                                                                                                                                                                                                                               | AB              |

|                                                                                                                                                                                                                             |    |
|-----------------------------------------------------------------------------------------------------------------------------------------------------------------------------------------------------------------------------|----|
| I agree to publish with the guidelines my complete disclosures, this agreement, and future attestations.                                                                                                                    | AB |
| I understand that for 1 year following initial publication of the guidelines, I am encouraged by ASH to avoid new conflicts of interest that could reduce trust in the guidelines, in accordance with my own best judgment. | AB |

Agreed by

Angela M. Barbara

Date

2021 July 19

### Section 3. ASH Review Prior to Participation

For ASH Internal Use Only

| <i>Name, Role</i>                                                        | <i>Date</i>   | <i>Management Notes</i> |
|--------------------------------------------------------------------------|---------------|-------------------------|
| Eddrika Russell, ASH Staff                                               | July 19, 2021 |                         |
| Dee Terrell, PhD, Ex Officio, ASH<br>Guideline Oversight<br>Subcommittee | July 21, 2021 | Participation Approved  |
|                                                                          |               |                         |
|                                                                          |               |                         |

## Section 4. Disclosures and Attestations During Participation

For ASH Internal Use Only

| <i>Disclosure or attestation</i> | <i>Date</i>      | <i>Reviewed by</i>           | <i>Management Notes</i>                                             |
|----------------------------------|------------------|------------------------------|---------------------------------------------------------------------|
| Attestation                      | July 19, 2021    | Russell                      | Dr. Barbara agreed to adhere to the policies described herein.      |
| Attestation                      | October 5, 2021  | Russell                      | Dr. Barbara agreed to adhere to the policies described herein.      |
| Attestation                      | January 24, 2022 | Kendall Alexander, ASH Staff | Dr. Barbara agreed to adhere to the policies described herein.      |
|                                  | April 2, 2022    | Deion Smith, ASH Staff       | Dr. Barbara confirmed that all information in this form is correct. |

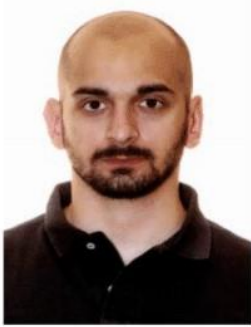

## Antonio Bognanni, MD

Physician

McMaster University

Hamilton, Ontario, Canada

---

### Project

ASH Clinical Practice Guidelines on Anticoagulation in Patients with COVID-19

### Role

Review Team Member

### Profile

Dr. Antonio Bognanni graduated in July 2019 from “University San Raffaele” International Medical School in Milan, Italy. Genuinely interested in the fields of Hematology, Pediatric Immuno-Hematology and Gene Therapy, Dr. Bognanni concluded his medical studies and research project under the supervision of Prof. Alessandro Aiuti, chair of the Pediatric Immuno-Hematology department at Hospital San Raffaele and primary coordinator of HRS-Telethon Institute for Gene Therapy.

After a post-graduate internship at the HEI Department of McMaster University, Dr. Bognanni collaborated in different methodological projects regarding food allergy and other topics. He then joined the Health Research Methodology MSc program and actively contributed to systematic reviews dealing with physical distancing, preventive measures for transmission of SARS-CoV-2, ventilation techniques and safe management of bodies of deceased persons with suspected or confirmed COVID-19. In September 2021, Dr. Bognanni entered the Health Research Methodology PhD program.

[July 17, 2020: profile approved by Dr. Bognanni. Updated September 2021.]

## Section 1. Disclosures Prior to Participation

### Definitions

|                                             |                                                                                                                                                                                                                                                                                                                                                                                                                                                                                                                                                                                                                                                             |
|---------------------------------------------|-------------------------------------------------------------------------------------------------------------------------------------------------------------------------------------------------------------------------------------------------------------------------------------------------------------------------------------------------------------------------------------------------------------------------------------------------------------------------------------------------------------------------------------------------------------------------------------------------------------------------------------------------------------|
| <b><i>Conflict of interest</i></b>          | A situation in which a reasonable person would consider that an individual’s judgments or actions regarding any aspect of the guideline development process is, or could be perceived to be, influenced by an outside interest                                                                                                                                                                                                                                                                                                                                                                                                                              |
| <b><i>Financial interest</i></b>            | A position or relationship held by an individual that offers potential gain or loss of monetary value, such as employment, stock ownership, payment for services, or gifts given with the expectation of reciprocity                                                                                                                                                                                                                                                                                                                                                                                                                                        |
| <b><i>Direct financial interest</i></b>     | A financial interest that is owned by the individual or received directly by the individual                                                                                                                                                                                                                                                                                                                                                                                                                                                                                                                                                                 |
| <b><i>Indirect financial interest</i></b>   | A financial interest that is owned or received via an intermediary, e.g., research funding to an individual received through the individual’s academic institution                                                                                                                                                                                                                                                                                                                                                                                                                                                                                          |
| <b><i>For-profit healthcare company</i></b> | “A for-profit entity that develops, produces, markets, or distributes drugs, devices, services, or therapies used to diagnose, treat, monitor, manage, and alleviate health conditions. This definition is not intended to include non-profit entities, entities outside of the healthcare sector, or entities through which physicians provide clinical services directly to patients” (Council of Medical Specialty Societies’ “Code for Interactions With Industry” 2015). This definition is furthermore not viewed by ASH to include companies that provide accredited continuing medical education or that publish scientific or educational content. |

### Part A. Direct Financial Interests

#### Employment With For-Profit Healthcare Companies

1. Are you currently or in the past 24 months have you been an employee of any **for-profit healthcare company**?

No

Yes, as described below:

Add rows as needed for each employment relationship.

| <i>Company</i> | <i>Description</i> | <i>End Date</i> | <i>For ASH Internal Use</i> |
|----------------|--------------------|-----------------|-----------------------------|
|                |                    |                 |                             |

### Equity in For-Profit Healthcare Companies

2. Do you currently or in the past 24 months have you had equity in any **for-profit healthcare company**? Equity includes stock, stock options, and other ownership interests but excludes diversified mutual fund shares.

No

Yes, as described below:

Add rows as needed for each equity interest.

| <i>Company</i> | <i>Description</i> | <i>Date Divested</i> | <i>For ASH Internal Use</i> |
|----------------|--------------------|----------------------|-----------------------------|
|                |                    |                      |                             |

### Healthcare-Related Patents, Royalties, and Other Intellectual Property

3. Do you currently or in the past 24 months have you owned patents for or received royalties from any intellectual property or product used to diagnose, treat, monitor, manage, or alleviate health conditions?

No

Yes, as described below:

Add rows as needed for each patent or royalty interest.

| <i>Company</i> | <i>Description</i> | <i>Date Divested</i> | <i>For ASH Internal Use</i> |
|----------------|--------------------|----------------------|-----------------------------|
|                |                    |                      |                             |

### Personal Income or Other Direct Transfers of Value From For-Profit Healthcare Companies

4. Do you currently or in the past 24 months have you received any personal income or other direct transfers of value (e.g., honoraria, gifts, travel support, meeting registration, meals) from any **for-profit healthcare company**?

No

Yes, as described below:

Column 1 Name the company.

Column 2 Describe the activity for which you received the income or other transfer of value, e.g., research, consultancy, speakers bureau involvement, service on an advisory committee or board, expert testimony.



Column 3 Indicate when the activity ended, if applicable. (If the activity has not yet ended, indicate “current” or “ongoing.”)

Add rows as needed for each activity.

| <i>Company</i> | <i>Description</i> | <i>End Date</i> | <i>For ASH Internal Use</i> |
|----------------|--------------------|-----------------|-----------------------------|
|                |                    |                 |                             |

#### My Partner’s or Spouse’s Interests

5. Currently or in the past 24 months has *your partner or spouse* had any of the interests or relationships described in questions 1-4?

No

Yes, as described below:

Add rows as needed for each interest.

| <i>Company</i> | <i>Description</i> | <i>End Date</i> | <i>For ASH Internal Use</i> |
|----------------|--------------------|-----------------|-----------------------------|
|                |                    |                 |                             |

#### Other Relevant Direct Financial Interests

6. Do you have other current or recent (within the past 24 months) **direct financial interests** with any institution, organization, entity or individual that could be relevant to the work of developing these guidelines?

No

Yes

If yes, please explain:

## Part B. Indirect Financial Interests

### Institutional Research Funded by For-Profit Healthcare Companies

1. Through your institution, do you currently or in the past 24 months have you been involved in research funded or supported (e.g., in kind support, such as provision of a study drug) by any **for-profit healthcare company**?

No

Yes, as described below:

Column 1 Name the company funding or supporting the research.

Column 2 Briefly describe the research project.

Column 3 Describe your role: (a) national or overall principal investigator, (b) member of a steering committee of a study that does not have a principal investigator, (c) site or local investigator. If other than these options, please describe.

Column 4 Indicate when your involvement ended, if applicable. (If your involvement has not yet ended, indicate “current” or “ongoing.”)

Add rows as needed for each research project.

| <i>Company</i> | <i>Description of Research</i> | <i>My Role</i> | <i>End Date</i> | <i>For ASH Internal Use</i> |
|----------------|--------------------------------|----------------|-----------------|-----------------------------|
|                |                                |                |                 |                             |

### Paid and Volunteer Activities for Organizations Supported by For-Profit Healthcare Companies

2. Do you currently or in the past 24 months have you been involved in any volunteer or paid work for an organization that is wholly or partially funded by any **for-profit healthcare company**?

No

Yes, as described below:

Column 1 Name the organization. If known to you, describe any industry funding or support.

Column 2 Briefly describe your activity and role, e.g., employment, service on board of directors, other volunteer services.

Column 3 Indicate if your activity was paid or volunteered.

Column 4 Indicate when your involvement with the organization ended. (If your involvement has not yet ended, indicate “current” or “ongoing.”)

Add rows as needed for each organization.

| <i>Organization</i> | <i>Description and role</i> | <i>Paid or Unpaid?</i> | <i>End Date</i> | <i>For ASH Internal Use</i> |
|---------------------|-----------------------------|------------------------|-----------------|-----------------------------|
|                     |                             |                        |                 |                             |

Other Relevant Indirect Financial Interests

3. Do you have other **indirect financial interests** with any: (i) **for-profit healthcare** company; or (ii) other institution, organization, entity or individual that could be relevant to the work of developing these guidelines?

No

Yes

If yes, please explain:

## Part C. Relevant Other Interests That Are Not Mainly Financial

### Personal Beliefs

1. Do you have strongly held beliefs related to the topic of these guidelines?

No

Yes

If yes, please explain:

### Previously Published Opinions

2. Have you ever authored, coauthored, or publicly provided an opinion related to the topic of these guidelines, e.g., a clinical practice guideline, textbook, review article, meeting poster or presentation, grand rounds talk, letter to the editor?

No

Yes

If yes, what were those views and where were they made?

### Non-Industry Supported Research

3. Currently or in the past 24 months, have you been involved in a leadership role in any research project not already reported under Part B, Question 1, relevant to the topic of these guidelines, e.g., a research project funded by a nonprofit or governmental organization?

No

Yes, as described below:

Column 1 Name the entity funding the research.

Column 2 Describe the research project.

Column 3 Describe your role: (a) national or overall principal investigator, (b) member of a steering committee of a study that does not have a principal investigator, (c) site or local investigator. If other than these options, please describe.

Column 4 Indicate when your involvement ended, if applicable. (If your involvement has not yet ended, indicate "current" or "ongoing.")

Add rows as needed for each research project.

| <i>Funder</i> | <i>Description of Research</i> | <i>My Role</i> | <i>End Date</i> |
|---------------|--------------------------------|----------------|-----------------|
|               |                                |                |                 |

### Institutional Relationships

4. Could your compensation be affected by recommendations on this topic?

Don't know

No

Yes

If yes, please explain:

5. Do you generate revenues for your institution or employer by clinical activity, teaching, speaking, consulting, testifying, writing, or otherwise sharing your knowledge or opinions about this guideline topic?

Don't know

No

Yes

If yes, please explain:

6. Could your institution benefit or be harmed by guidelines on this topic?

Don't know

No

Yes

If yes, please explain:

### Career Advancement

7. How would you characterize the support you would receive from your primary mentor, institution, or other entities if your work on this panel or authorship of these guidelines generated a strong reaction from peers outside your institution?

Answer: Likely positive

### Involvement in Organizations With Relevant Policies, Positions, or Guidelines

8. Are you involved as an employee, volunteer, or member of any organization that has published or to your knowledge is currently developing policies, positions, or guidelines relevant to these ASH

guidelines, e.g., clinical practice guidelines, appropriate use criteria, expert consensus statement, mission statement, advocacy statement, amicus brief, or legislature or legal testimony?

No

Yes, as described below:

Column 1 Name the organization.

Column 2 Describe or reference the relevant policy, position, or guidelines.

Column 3 Describe your role with the organization, including your involvement in developing, disseminating, or implementing the relevant policy, position, or guidelines.

Add rows as needed for each organization.

| <i>Organization</i> | <i>Relevant Policy Position</i>                                                                                                                   | <i>Your Role</i>                                                                                                         |
|---------------------|---------------------------------------------------------------------------------------------------------------------------------------------------|--------------------------------------------------------------------------------------------------------------------------|
| McMaster University | Systematic review and meta-analysis on physical distancing, face masks, and eye protection to prevent person-to-person transmission of SARS-CoV-2 | Assessment of reference eligibility, screening, data extraction, RoB assessment, final manuscript revision and approval. |
| McMaster University | Living systematic review on ventilation techniques and risk for transmission of coronavirus disease, including COVID-19                           | Assessment of reference eligibility, screening, data extraction, RoB assessment, final manuscript revision and approval. |
| McMaster University | Rapid systematic review of the literature on safe management of bodies of deceased persons with suspected or confirmed COVID-19                   | Assessment of reference eligibility, screening and data extraction.                                                      |

### Clinical Practice

9. Do you see patients clinically?

No

Yes

If yes, what is your primary specialty or subspecialty?

If yes, do you prescribe or otherwise recommend clinical interventions (e.g., screening or diagnostic tests, evaluations, treatments, procedures) that may be addressed by these guidelines?

No

Yes

If yes, please explain:

#### Other

10. Do you have other nonfinancial interests or relationships not described above that could be relevant to the work of developing these guidelines?

No

Yes

If yes, please describe:

#### Expected Interests

11. Do you expect to enter into, within the next 24 months, any new **financial or nonfinancial interests** not described above that could be relevant to the work of developing these guidelines?

No

Yes

If yes, please describe:

## Section 2. Attestation of Compliance With Conflict of Interest Policies

In consideration of my participation on these guidelines, I hereby certify and agree that:

| <i>Policy</i>                                                                                                                                                                                                                                                                                                                                                                                                                                                                                                                                                                                                                                                                                                                                                                                                                                                                                                                                                                                                                                                                                                                                                                                                             | <i>Initials</i> |
|---------------------------------------------------------------------------------------------------------------------------------------------------------------------------------------------------------------------------------------------------------------------------------------------------------------------------------------------------------------------------------------------------------------------------------------------------------------------------------------------------------------------------------------------------------------------------------------------------------------------------------------------------------------------------------------------------------------------------------------------------------------------------------------------------------------------------------------------------------------------------------------------------------------------------------------------------------------------------------------------------------------------------------------------------------------------------------------------------------------------------------------------------------------------------------------------------------------------------|-----------------|
| I have reviewed and understand the ASH Principles and Policies on Conflict of Interest published on the ASH website at <a href="https://www.hematology.org/about/governance/conflict-of-interest">https://www.hematology.org/about/governance/conflict-of-interest</a> including the special Policy on Management of Conflicts in the Development of Clinical Practice Guidelines (“ASH Policy”).                                                                                                                                                                                                                                                                                                                                                                                                                                                                                                                                                                                                                                                                                                                                                                                                                         | AB              |
| I have disclosed and will continue to disclose completely all potential conflicts of interest for myself and for my partner or spouse, to the best of my ability and knowledge, in accordance with ASH Policy and this Disclosure Form.                                                                                                                                                                                                                                                                                                                                                                                                                                                                                                                                                                                                                                                                                                                                                                                                                                                                                                                                                                                   | AB              |
| To ensure completeness and avoid discrepancies, I have checked and periodically will check my financial disclosures against other published information, including from the U.S. Centers for Medicare and Medicaid Services’ Open Payments database (or similar non-U.S. database) and explain any discrepant information.                                                                                                                                                                                                                                                                                                                                                                                                                                                                                                                                                                                                                                                                                                                                                                                                                                                                                                | AB              |
| <p>Until submission of the guidelines for publication, I understand and agree that without special exception from ASH, any of the following will disqualify me from continued participation and I will not enter into:</p> <ul style="list-style-type: none"> <li>• Any <b>direct financial interest</b> of myself or my partner or spouse in any <b>for-profit healthcare company or companies</b>, if such interests in aggregate may be reasonably valued to be &gt;\$5,000/year, regardless of relevance to the guidelines</li> <li>• Any noneducational speaking by myself on behalf of any <b>for-profit healthcare company</b> (e.g., service on a company “speakers bureau”), regardless of relevance to the guidelines</li> <li>• Consulting or advising about the marketing of products by any <b>for-profit healthcare company</b> (e.g., service on a company “advisory board”), regardless of relevance to the guidelines</li> <li>• Simultaneous participation on guidelines by another organization on the same topic</li> <li>• Any <i>undisclosed</i> financial interest in any <b>for-profit healthcare company</b> occurring in the 24 months prior to my participation on these guidelines</li> </ul> | AB              |
| I understand that if a disqualifying interest is reported, the usual course of action will be dismissal from participation and acknowledgment within the guideline publication rather than authorship.                                                                                                                                                                                                                                                                                                                                                                                                                                                                                                                                                                                                                                                                                                                                                                                                                                                                                                                                                                                                                    | AB              |
| At regular intervals during the guideline development process, as determined by ASH, I will review my information in this Disclosure Form; provide updated disclosures; and, if requested, attest that I do not have any interests that should disqualify my participation.                                                                                                                                                                                                                                                                                                                                                                                                                                                                                                                                                                                                                                                                                                                                                                                                                                                                                                                                               | AB              |



|                                                                                                                                                                                                                             |    |
|-----------------------------------------------------------------------------------------------------------------------------------------------------------------------------------------------------------------------------|----|
| I agree to publish with the guidelines my complete disclosures, this agreement, and future attestations.                                                                                                                    | AB |
| I understand that for 1 year following initial publication of the guidelines, I am encouraged by ASH to avoid new conflicts of interest that could reduce trust in the guidelines, in accordance with my own best judgment. | AB |

Agreed by

Antonio Bognanni

Date

29.06.2020

### Section 3. ASH Review Prior to Participation

For ASH Internal Use Only

| <i>Name, Role</i>                                                      | <i>Date</i>   | <i>Management Notes</i> |
|------------------------------------------------------------------------|---------------|-------------------------|
| Eddrika Russell, ASH Staff                                             | July 15, 2020 |                         |
| Menaka Pai, MD, Ex Officio, ASH<br>Guideline Oversight<br>Subcommittee | July 15, 2020 | Participation Approved  |

## Section 4. Disclosures and Attestations During Participation

For ASH Internal Use Only

| <i>Disclosure or attestation</i> | <i>Date</i>      | <i>Reviewed by</i>           | <i>Management Notes</i>                                                     |
|----------------------------------|------------------|------------------------------|-----------------------------------------------------------------------------|
| Attestation                      | June 29, 2021    | Russell                      | Dr. Bognanni agreed to continue to adhere to the policies described herein. |
| Attestation                      | October 6, 2021  | Russell                      | Dr. Bognanni agreed to continue to adhere to the policies described herein. |
| Attestation                      | January 18, 2022 | Kendall Alexander, ASH Staff | Dr. Bognanni agreed to continue to adhere to the policies described herein. |
|                                  | April 6, 2022    | Deion Smith, ASH Staff       | Dr. Bognanni confirmed that all information in this form is correct.        |



ASH Clinical Practice Guidelines  
Participant Information

---

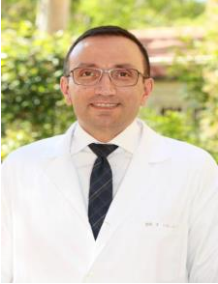

## Imad Bouakl, MD

Assistant Professor, School of Medicine

American University of Beirut

Beirut, Lebanon

---

### Project

ASH Clinical Practice Guidelines on Anticoagulation in Patients with COVID-19

### Role

Review Team Member

### Profile

Imad Bouakl is currently an associate professor at the American University of Beirut's School of Medicine. Dr. Bouakl is Director of the Pulmonary and Critical Care Fellowship Program, Associate Program Director of the Internal Medicine Residency, and Coordinator of the pulmonary module at the School of Medicine. He also serves as the Chairperson of the Critical Care Committee. His research focuses on issues related to pulmonary hypertension, mechanical ventilation, and assessment systems in medical education.

[July 20, 2020 profile approved by Dr. Bouakl]

## Section 1. Disclosures Prior to Participation

### Definitions

|                                             |                                                                                                                                                                                                                                                                                                                                                                                                                                                                                                                                                                                                                                                             |
|---------------------------------------------|-------------------------------------------------------------------------------------------------------------------------------------------------------------------------------------------------------------------------------------------------------------------------------------------------------------------------------------------------------------------------------------------------------------------------------------------------------------------------------------------------------------------------------------------------------------------------------------------------------------------------------------------------------------|
| <b><i>Conflict of interest</i></b>          | A situation in which a reasonable person would consider that an individual’s judgments or actions regarding any aspect of the guideline development process is, or could be perceived to be, influenced by an outside interest                                                                                                                                                                                                                                                                                                                                                                                                                              |
| <b><i>Financial interest</i></b>            | A position or relationship held by an individual that offers potential gain or loss of monetary value, such as employment, stock ownership, payment for services, or gifts given with the expectation of reciprocity                                                                                                                                                                                                                                                                                                                                                                                                                                        |
| <b><i>Direct financial interest</i></b>     | A financial interest that is owned by the individual or received directly by the individual                                                                                                                                                                                                                                                                                                                                                                                                                                                                                                                                                                 |
| <b><i>Indirect financial interest</i></b>   | A financial interest that is owned or received via an intermediary, e.g., research funding to an individual received through the individual’s academic institution                                                                                                                                                                                                                                                                                                                                                                                                                                                                                          |
| <b><i>For-profit healthcare company</i></b> | “A for-profit entity that develops, produces, markets, or distributes drugs, devices, services, or therapies used to diagnose, treat, monitor, manage, and alleviate health conditions. This definition is not intended to include non-profit entities, entities outside of the healthcare sector, or entities through which physicians provide clinical services directly to patients” (Council of Medical Specialty Societies’ “Code for Interactions With Industry” 2015). This definition is furthermore not viewed by ASH to include companies that provide accredited continuing medical education or that publish scientific or educational content. |

### Part A. Direct Financial Interests

#### Employment With For-Profit Healthcare Companies

1. Are you currently or in the past 24 months have you been an employee of any **for-profit healthcare company**?

No

Yes, as described below:

Add rows as needed for each employment relationship.

| <i>Company</i> | <i>Description</i> | <i>End Date</i> | <i>For ASH Internal Use</i> |
|----------------|--------------------|-----------------|-----------------------------|
|                |                    |                 |                             |

### Equity in For-Profit Healthcare Companies

2. Do you currently or in the past 24 months have you had equity in any **for-profit healthcare company**? Equity includes stock, stock options, and other ownership interests but excludes diversified mutual fund shares.

No

Yes, as described below:

Add rows as needed for each equity interest.

| <i>Company</i> | <i>Description</i> | <i>Date Divested</i> | <i>For ASH Internal Use</i> |
|----------------|--------------------|----------------------|-----------------------------|
|                |                    |                      |                             |

### Healthcare-Related Patents, Royalties, and Other Intellectual Property

3. Do you currently or in the past 24 months have you owned patents for or received royalties from any intellectual property or product used to diagnose, treat, monitor, manage, or alleviate health conditions?

No

Yes, as described below:

Add rows as needed for each patent or royalty interest.

| <i>Company</i> | <i>Description</i> | <i>Date Divested</i> | <i>For ASH Internal Use</i> |
|----------------|--------------------|----------------------|-----------------------------|
|                |                    |                      |                             |

### Personal Income or Other Direct Transfers of Value From For-Profit Healthcare Companies

4. Do you currently or in the past 24 months have you received any personal income or other direct transfers of value (e.g., honoraria, gifts, travel support, meeting registration, meals) from any **for-profit healthcare company**?

No

Yes, as described below:

Column 1 Name the company.

Column 2 Describe the activity for which you received the income or other transfer of value, e.g., research, consultancy, speakers bureau involvement, service on an advisory committee or board, expert testimony.

Column 3 Indicate when the activity ended, if applicable. (If the activity has not yet ended, indicate "current" or "ongoing.")

Add rows as needed for each activity.

| <i>Company</i> | <i>Description</i> | <i>End Date</i> | <i>For ASH Internal Use</i> |
|----------------|--------------------|-----------------|-----------------------------|
|                |                    |                 |                             |

#### My Partner's or Spouse's Interests

5. Currently or in the past 24 months has *your partner or spouse* had any of the interests or relationships described in questions 1-4?

No

Yes, as described below:

Add rows as needed for each interest.

| <i>Company</i> | <i>Description</i> | <i>End Date</i> | <i>For ASH Internal Use</i> |
|----------------|--------------------|-----------------|-----------------------------|
|                |                    |                 |                             |

#### Other Relevant Direct Financial Interests

6. Do you have other current or recent (within the past 24 months) **direct financial interests** with any institution, organization, entity or individual that could be relevant to the work of developing these guidelines?

No

Yes

If yes, please explain:

## Part B. Indirect Financial Interests

### Institutional Research Funded by For-Profit Healthcare Companies

1. Through your institution, do you currently or in the past 24 months have you been involved in research funded or supported (e.g., in kind support, such as provision of a study drug) by any **for-profit healthcare company**?

No

Yes, as described below:

Column 1 Name the company funding or supporting the research.

Column 2 Briefly describe the research project.

Column 3 Describe your role: (a) national or overall principal investigator, (b) member of a steering committee of a study that does not have a principal investigator, (c) site or local investigator. If other than these options, please describe.

Column 4 Indicate when your involvement ended, if applicable. (If your involvement has not yet ended, indicate “current” or “ongoing.”)

Add rows as needed for each research project.

| <i>Company</i> | <i>Description of Research</i> | <i>My Role</i> | <i>End Date</i> | <i>For ASH Internal Use</i> |
|----------------|--------------------------------|----------------|-----------------|-----------------------------|
|                |                                |                |                 |                             |

### Paid and Volunteer Activities for Organizations Supported by For-Profit Healthcare Companies

2. Do you currently or in the past 24 months have you been involved in any volunteer or paid work for an organization that is wholly or partially funded by any **for-profit healthcare company**?

No

Yes, as described below:

Column 1 Name the organization. If known to you, describe any industry funding or support.

Column 2 Briefly describe your activity and role, e.g., employment, service on board of directors, other volunteer services.

Column 3 Indicate if your activity was paid or volunteered.

Column 4 Indicate when your involvement with the organization ended. (If your involvement has not yet ended, indicate “current” or “ongoing.”)

Add rows as needed for each organization.



| <i>Organization</i> | <i>Description and role</i> | <i>Paid or Unpaid?</i> | <i>End Date</i> | <i>For ASH Internal Use</i> |
|---------------------|-----------------------------|------------------------|-----------------|-----------------------------|
|                     |                             |                        |                 |                             |

Other Relevant Indirect Financial Interests

3. Do you have other **indirect financial interests** with any: (i) **for-profit healthcare** company; or (ii) other institution, organization, entity or individual that could be relevant to the work of developing these guidelines?

No

Yes

If yes, please explain:

## Part C. Relevant Other Interests That Are Not Mainly Financial

### Personal Beliefs

1. Do you have strongly held beliefs related to the topic of these guidelines?

No

Yes

If yes, please explain:

### Previously Published Opinions

2. Have you ever authored, coauthored, or publicly provided an opinion related to the topic of these guidelines, e.g., a clinical practice guideline, textbook, review article, meeting poster or presentation, grand rounds talk, letter to the editor?

No

Yes

If yes, what were those views and where were they made?

### Non-Industry Supported Research

3. Currently or in the past 24 months, have you been involved in a leadership role in any research project not already reported under Part B, Question 1, relevant to the topic of these guidelines, e.g., a research project funded by a nonprofit or governmental organization?

No

Yes, as described below:

Column 1 Name the entity funding the research.

Column 2 Describe the research project.

Column 3 Describe your role: (a) national or overall principal investigator, (b) member of a steering committee of a study that does not have a principal investigator, (c) site or local investigator. If other than these options, please describe.

Column 4 Indicate when your involvement ended, if applicable. (If your involvement has not yet ended, indicate "current" or "ongoing.")

Add rows as needed for each research project.

| <i>Funder</i> | <i>Description of Research</i> | <i>My Role</i> | <i>End Date</i> |
|---------------|--------------------------------|----------------|-----------------|
|               |                                |                |                 |

### Institutional Relationships

4. Could your compensation be affected by recommendations on this topic?

Don't know

No

Yes

If yes, please explain:

5. Do you generate revenues for your institution or employer by clinical activity, teaching, speaking, consulting, testifying, writing, or otherwise sharing your knowledge or opinions about this guideline topic?

Don't know

No

Yes

If yes, please explain:

6. Could your institution benefit or be harmed by guidelines on this topic?

Don't know

No

Yes

If yes, please explain:

### Career Advancement

7. How would you characterize the support you would receive from your primary mentor, institution, or other entities if your work on this panel or authorship of these guidelines generated a strong reaction from peers outside your institution?

Positive support.

### Involvement in Organizations With Relevant Policies, Positions, or Guidelines

8. Are you involved as an employee, volunteer, or member of any organization that has published or to your knowledge is currently developing policies, positions, or guidelines relevant to these ASH

guidelines, e.g., clinical practice guidelines, appropriate use criteria, expert consensus statement, mission statement, advocacy statement, amicus brief, or legislature or legal testimony?

No

Yes, as described below:

Column 1 Name the organization.

Column 2 Describe or reference the relevant policy, position, or guidelines.

Column 3 Describe your role with the organization, including your involvement in developing, disseminating, or implementing the relevant policy, position, or guidelines.

Add rows as needed for each organization.

| <i>Organization</i> | <i>Relevant Policy Position</i> | <i>Your Role</i> |
|---------------------|---------------------------------|------------------|
|                     |                                 |                  |

#### Clinical Practice

9. Do you see patients clinically?

No

Yes

If yes, what is your primary specialty or subspecialty?

I see patients clinically. I see pulmonary patients in clinic, in hospital and in the ICU. I also cover the COVID 2019 ICU patients.

If yes, do you prescribe or otherwise recommend clinical interventions (e.g., screening or diagnostic tests, evaluations, treatments, procedures) that may be addressed by these guidelines?

No

Yes

If yes, please explain:

I will be prescribing medication in the COVID ICU units to my patients that are covered in the guidelines.

#### Other

10. Do you have other nonfinancial interests or relationships not described above that could be relevant to the work of developing these guidelines?

No

Yes

If yes, please describe:

#### Expected Interests

11. Do you expect to enter into, within the next 24 months, any new **financial or nonfinancial interests** not described above that could be relevant to the work of developing these guidelines?

No

Yes

If yes, please describe:

## Section 2. Attestation of Compliance With Conflict of Interest Policies

In consideration of my participation on these guidelines, I hereby certify and agree that:

| <i>Policy</i>                                                                                                                                                                                                                                                                                                                                                                                                                                                                                                                                                                                                                                                                                                                                                                                                                                                                                                                                                                                                                                                                                                                                                                                                             | <i>Initials</i> |
|---------------------------------------------------------------------------------------------------------------------------------------------------------------------------------------------------------------------------------------------------------------------------------------------------------------------------------------------------------------------------------------------------------------------------------------------------------------------------------------------------------------------------------------------------------------------------------------------------------------------------------------------------------------------------------------------------------------------------------------------------------------------------------------------------------------------------------------------------------------------------------------------------------------------------------------------------------------------------------------------------------------------------------------------------------------------------------------------------------------------------------------------------------------------------------------------------------------------------|-----------------|
| I have reviewed and understand the ASH Principles and Policies on Conflict of Interest published on the ASH website at <a href="https://www.hematology.org/about/governance/conflict-of-interest">https://www.hematology.org/about/governance/conflict-of-interest</a> including the special Policy on Management of Conflicts in the Development of Clinical Practice Guidelines (“ASH Policy”).                                                                                                                                                                                                                                                                                                                                                                                                                                                                                                                                                                                                                                                                                                                                                                                                                         | IB              |
| I have disclosed and will continue to disclose completely all potential conflicts of interest for myself and for my partner or spouse, to the best of my ability and knowledge, in accordance with ASH Policy and this Disclosure Form.                                                                                                                                                                                                                                                                                                                                                                                                                                                                                                                                                                                                                                                                                                                                                                                                                                                                                                                                                                                   | IB              |
| To ensure completeness and avoid discrepancies, I have checked and periodically will check my financial disclosures against other published information, including from the U.S. Centers for Medicare and Medicaid Services’ Open Payments database (or similar non-U.S. database) and explain any discrepant information.                                                                                                                                                                                                                                                                                                                                                                                                                                                                                                                                                                                                                                                                                                                                                                                                                                                                                                | IB              |
| <p>Until submission of the guidelines for publication, I understand and agree that without special exception from ASH, any of the following will disqualify me from continued participation and I will not enter into:</p> <ul style="list-style-type: none"> <li>• Any <b>direct financial interest</b> of myself or my partner or spouse in any <b>for-profit healthcare company or companies</b>, if such interests in aggregate may be reasonably valued to be &gt;\$5,000/year, regardless of relevance to the guidelines</li> <li>• Any noneducational speaking by myself on behalf of any <b>for-profit healthcare company</b> (e.g., service on a company “speakers bureau”), regardless of relevance to the guidelines</li> <li>• Consulting or advising about the marketing of products by any <b>for-profit healthcare company</b> (e.g., service on a company “advisory board”), regardless of relevance to the guidelines</li> <li>• Simultaneous participation on guidelines by another organization on the same topic</li> <li>• Any <i>undisclosed</i> financial interest in any <b>for-profit healthcare company</b> occurring in the 24 months prior to my participation on these guidelines</li> </ul> | IB              |
| I understand that if a disqualifying interest is reported, the usual course of action will be dismissal from participation and acknowledgment within the guideline publication rather than authorship.                                                                                                                                                                                                                                                                                                                                                                                                                                                                                                                                                                                                                                                                                                                                                                                                                                                                                                                                                                                                                    | IB              |
| At regular intervals during the guideline development process, as determined by ASH, I will review my information in this Disclosure Form; provide updated disclosures; and, if requested, attest that I do not have any interests that should disqualify my participation.                                                                                                                                                                                                                                                                                                                                                                                                                                                                                                                                                                                                                                                                                                                                                                                                                                                                                                                                               | IB              |

|                                                                                                                                                                                                                             |  |
|-----------------------------------------------------------------------------------------------------------------------------------------------------------------------------------------------------------------------------|--|
| I agree to publish with the guidelines my complete disclosures, this agreement, and future attestations.                                                                                                                    |  |
| I understand that for 1 year following initial publication of the guidelines, I am encouraged by ASH to avoid new conflicts of interest that could reduce trust in the guidelines, in accordance with my own best judgment. |  |

Agreed by

Imad Bouaki

Date

13-7-2020

### Section 3. ASH Review Prior to Participation

For ASH Internal Use Only

| <i>Name, Role</i>                                                  | <i>Date</i>   | <i>Management Notes</i> |
|--------------------------------------------------------------------|---------------|-------------------------|
| Eddrika Russell, ASH staff                                         | July 16, 2020 |                         |
| Menaka Pai, MD, Ex Officio,<br>Guideline Oversight<br>Subcommittee | July 16, 2020 | Participation Approved  |



## Section 4. Disclosures and Attestations During Participation

For ASH Internal Use Only

| <i>Disclosure or attestation</i> | <i>Date</i>     | <i>Reviewed by</i>     | <i>Management Notes</i>                                            |
|----------------------------------|-----------------|------------------------|--------------------------------------------------------------------|
| Attestation                      | July 13, 2020   | Russell                | Dr. Bouakl agreed to adhere to the policies described herein.      |
| Attestation                      | July 5, 2021    | Russell                | Dr. Bouakl agreed to adhere to the policies described herein.      |
| Attestation                      | October 6, 2021 | Russell                | Dr. Bouakl agreed to adhere to the policies described herein.      |
|                                  | April 5, 2022   | Deion Smith, ASH Staff | Dr. Bouakl confirmed that all information in this form is correct. |



ASH Clinical Practice Guidelines  
Participant Information

---

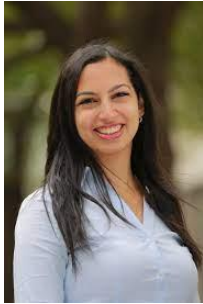

Mary Ellene Boulos, BSc, MSc

Medical Student

Michael G. DeGroote School of Medicine, McMaster University

Hamilton, ON, Canada

---

### Project

ASH Clinical Practice Guidelines on Anticoagulation in Patients with COVID-19

### Role

Review Team Member

### Profile

Ms. Boulos is a medical student at McMaster University in Canada. She completed a Master of Science in Rehabilitation Sciences at the University of Toronto. Her thesis examined the feasibility and efficacy of delivering virtual mood and cognitive interventions to individuals living with chronic acquired brain injury. Her research interests include health services research, clinical trials, health equity, and epidemiology.

[August 31, 2020 profile approved by Ms. Boulos]

# 1. Disclosures Prior to Participation

## Definitions

- Conflict of interest** A situation in which a reasonable person would consider that an individual’s judgments or actions regarding any aspect of the guideline development process is, or could be perceived to be, influenced by an outside interest
- Financial interest** A position or relationship held by an individual that offers potential gain or loss of monetary value, such as employment, stock ownership, payment for services, or gifts given with the expectation of reciprocity
- Direct financial interest** A financial interest that is owned by the individual or received directly by the individual
- Indirect financial interest** A financial interest that is owned or received via an intermediary, e.g., research funding to an individual received through the individual’s academic institution
- For-profit healthcare company** “A for-profit entity that develops, produces, markets, or distributes drugs, devices, services, or therapies used to diagnose, treat, monitor, manage, and alleviate health conditions. This definition is not intended to include non-profit entities, entities outside of the healthcare sector, or entities through which physicians provide clinical services directly to patients” (Council of Medical Specialty Societies’ “Code for Interactions With Industry” 2015). This definition is furthermore not viewed by ASH to include companies that provide accredited continuing medical education or that publish scientific or educational content.

## Part A. Direct Financial Interests

### Employment With For-Profit Healthcare Companies

1. Are you currently or in the past 24 months have you been an employee of any **for-profit healthcare company**?

No

Yes, as described below:

Add rows as needed for each employment relationship.

| <i>Company</i> | <i>Description</i> | <i>End Date</i> | <i>For ASH Internal Use</i> |
|----------------|--------------------|-----------------|-----------------------------|
|                |                    |                 |                             |

### Equity in For-Profit Healthcare Companies

2. Do you currently or in the past 24 months have you had equity in any **for-profit healthcare company**? Equity includes stock, stock options, and other ownership interests but excludes diversified mutual fund shares.

No

Yes, as described below:

Add rows as needed for each equity interest.

| <i>Company</i> | <i>Description</i> | <i>Date Divested</i> | <i>For ASH Internal Use</i> |
|----------------|--------------------|----------------------|-----------------------------|
|                |                    |                      |                             |

### Healthcare-Related Patents, Royalties, and Other Intellectual Property

3. Do you currently or in the past 24 months have you owned patents for or received royalties from any intellectual property or product used to diagnose, treat, monitor, manage, or alleviate health conditions?

No

Yes, as described below:

Add rows as needed for each patent or royalty interest.

| <i>Company</i> | <i>Description</i> | <i>Date Divested</i> | <i>For ASH Internal Use</i> |
|----------------|--------------------|----------------------|-----------------------------|
|                |                    |                      |                             |

### Personal Income or Other Direct Transfers of Value From For-Profit Healthcare Companies

4. Do you currently or in the past 24 months have you received any personal income or other direct transfers of value (e.g., honoraria, gifts, travel support, meeting registration, meals) from any **for-profit healthcare company**?

No

Yes, as described below:

Column 1 Name the company.

Column 2 Describe the activity for which you received the income or other transfer of value, e.g., research, consultancy, speakers bureau involvement, service on an advisory committee or board, expert testimony.

Column 3 Indicate when the activity ended, if applicable. (If the activity has not yet ended, indicate "current" or "ongoing.")

Add rows as needed for each activity.

| <i>Company</i> | <i>Description</i> | <i>End Date</i> | <i>For ASH Internal Use</i> |
|----------------|--------------------|-----------------|-----------------------------|
|                |                    |                 |                             |

#### My Partner's or Spouse's Interests

5. Currently or in the past 24 months has *your partner or spouse* had any of the interests or relationships described in questions 1-4?

No

Yes, as described below:

Add rows as needed for each interest.

| <i>Company</i> | <i>Description</i> | <i>End Date</i> | <i>For ASH Internal Use</i> |
|----------------|--------------------|-----------------|-----------------------------|
|                |                    |                 |                             |

#### Other Relevant Direct Financial Interests

6. Do you have other current or recent (within the past 24 months) **direct financial interests** with any institution, organization, entity or individual that could be relevant to the work of developing these guidelines?

No

Yes

If yes, please explain:

## Part B. Indirect Financial Interests

### Institutional Research Funded by For-Profit Healthcare Companies

1. Through your institution, do you currently or in the past 24 months have you been involved in research funded or supported (e.g., in kind support, such as provision of a study drug) by any **for-profit healthcare company**?

No

Yes, as described below:

Column 1 Name the company funding or supporting the research.

Column 2 Briefly describe the research project.

Column 3 Describe your role: (a) national or overall principal investigator, (b) member of a steering committee of a study that does not have a principal investigator, (c) site or local investigator. If other than these options, please describe.

Column 4 Indicate when your involvement ended, if applicable. (If your involvement has not yet ended, indicate “current” or “ongoing.”)

Add rows as needed for each research project.

| <i>Company</i> | <i>Description of Research</i> | <i>My Role</i> | <i>End Date</i> | <i>For ASH Internal Use</i> |
|----------------|--------------------------------|----------------|-----------------|-----------------------------|
|                |                                |                |                 |                             |

### Paid and Volunteer Activities for Organizations Supported by For-Profit Healthcare Companies

2. Do you currently or in the past 24 months have you been involved in any volunteer or paid work for an organization that is wholly or partially funded by any **for-profit healthcare company**?

No

Yes, as described below:

Column 1 Name the organization. If known to you, describe any industry funding or support.

Column 2 Briefly describe your activity and role, e.g., employment, service on board of directors, other volunteer services.

Column 3 Indicate if your activity was paid or volunteered.

Column 4 Indicate when your involvement with the organization ended. (If your involvement has not yet ended, indicate “current” or “ongoing.”)

Add rows as needed for each organization.

| <i>Organization</i> | <i>Description and role</i> | <i>Paid or Unpaid?</i> | <i>End Date</i> | <i>For ASH Internal Use</i> |
|---------------------|-----------------------------|------------------------|-----------------|-----------------------------|
|                     |                             |                        |                 |                             |

Other Relevant Indirect Financial Interests

3. Do you have other **indirect financial interests** with any: (i) **for-profit healthcare** company; or (ii) other institution, organization, entity or individual that could be relevant to the work of developing these guidelines?

No

Yes

If yes, please explain:

## Part C. Relevant Other Interests That Are Not Mainly Financial

### Personal Beliefs

1. Do you have strongly held beliefs related to the topic of these guidelines?

No

Yes

If yes, please explain:

### Previously Published Opinions

2. Have you ever authored, coauthored, or publicly provided an opinion related to the topic of these guidelines, e.g., a clinical practice guideline, textbook, review article, meeting poster or presentation, grand rounds talk, letter to the editor?

No

Yes

If yes, what were those views and where were they made?

### Non-Industry Supported Research

3. Currently or in the past 24 months, have you been involved in a leadership role in any research project not already reported under Part B, Question 1, relevant to the topic of these guidelines, e.g., a research project funded by a nonprofit or governmental organization?

No

Yes, as described below:

Column 1 Name the entity funding the research.

Column 2 Describe the research project.

Column 3 Describe your role: (a) national or overall principal investigator, (b) member of a steering committee of a study that does not have a principal investigator, (c) site or local investigator. If other than these options, please describe.

Column 4 Indicate when your involvement ended, if applicable. (If your involvement has not yet ended, indicate "current" or "ongoing.")

Add rows as needed for each research project.

| <i>Funder</i> | <i>Description of Research</i> | <i>My Role</i> | <i>End Date</i> |
|---------------|--------------------------------|----------------|-----------------|
|               |                                |                |                 |



### Institutional Relationships

4. Could your compensation be affected by recommendations on this topic?

Don't know

No

Yes

If yes, please explain:

5. Do you generate revenues for your institution or employer by clinical activity, teaching, speaking, consulting, testifying, writing, or otherwise sharing your knowledge or opinions about this guideline topic?

Don't know

No

Yes

If yes, please explain:

6. Could your institution benefit or be harmed by guidelines on this topic?

Don't know

No

Yes

If yes, please explain:

### Career Advancement

7. How would you characterize the support you would receive from your primary mentor, institution, or other entities if your work on this panel or authorship of these guidelines generated a strong reaction from peers outside your institution?

**N/A**

### Involvement in Organizations With Relevant Policies, Positions, or Guidelines

8. Are you involved as an employee, volunteer, or member of any organization that has published or to your knowledge is currently developing policies, positions, or guidelines relevant to these ASH

guidelines, e.g., clinical practice guidelines, appropriate use criteria, expert consensus statement, mission statement, advocacy statement, amicus brief, or legislature or legal testimony?

No

Yes, as described below:

Column 1 Name the organization.

Column 2 Describe or reference the relevant policy, position, or guidelines.

Column 3 Describe your role with the organization, including your involvement in developing, disseminating, or implementing the relevant policy, position, or guidelines.

Add rows as needed for each organization.

| <i>Organization</i> | <i>Relevant Policy Position</i> | <i>Your Role</i> |
|---------------------|---------------------------------|------------------|
|                     |                                 |                  |

#### Clinical Practice

9. Do you see patients clinically?

No

Yes

If yes, what is your primary specialty or subspecialty?

If yes, do you prescribe or otherwise recommend clinical interventions (e.g., screening or diagnostic tests, evaluations, treatments, procedures) that may be addressed by these guidelines?

No

Yes

If yes, please explain:

#### Other

10. Do you have other nonfinancial interests or relationships not described above that could be relevant to the work of developing these guidelines?

No

Yes

If yes, please describe:

#### Expected Interests

11. Do you expect to enter into, within the next 24 months, any new **financial or nonfinancial interests** not described above that could be relevant to the work of developing these guidelines?

No

Yes

If yes, please describe:

## Section 2. Attestation of Compliance With Conflict of Interest Policies

In consideration of my participation on these guidelines, I hereby certify and agree that:

| <i>Policy</i>                                                                                                                                                                                                                                                                                                                                                                                                                                                                                                                                                                                                                                                                                                                                                                                                                                                                                                                                                                                                                                                                                                                                                                                                             | <i>Initials</i> |
|---------------------------------------------------------------------------------------------------------------------------------------------------------------------------------------------------------------------------------------------------------------------------------------------------------------------------------------------------------------------------------------------------------------------------------------------------------------------------------------------------------------------------------------------------------------------------------------------------------------------------------------------------------------------------------------------------------------------------------------------------------------------------------------------------------------------------------------------------------------------------------------------------------------------------------------------------------------------------------------------------------------------------------------------------------------------------------------------------------------------------------------------------------------------------------------------------------------------------|-----------------|
| I have reviewed and understand the ASH Principles and Policies on Conflict of Interest published on the ASH website at <a href="https://www.hematology.org/about/governance/conflict-of-interest">https://www.hematology.org/about/governance/conflict-of-interest</a> including the special Policy on Management of Conflicts in the Development of Clinical Practice Guidelines (“ASH Policy”).                                                                                                                                                                                                                                                                                                                                                                                                                                                                                                                                                                                                                                                                                                                                                                                                                         | MB              |
| I have disclosed and will continue to disclose completely all potential conflicts of interest for myself and for my partner or spouse, to the best of my ability and knowledge, in accordance with ASH Policy and this Disclosure Form.                                                                                                                                                                                                                                                                                                                                                                                                                                                                                                                                                                                                                                                                                                                                                                                                                                                                                                                                                                                   | MB              |
| To ensure completeness and avoid discrepancies, I have checked and periodically will check my financial disclosures against other published information, including from the U.S. Centers for Medicare and Medicaid Services’ Open Payments database (or similar non-U.S. database) and explain any discrepant information.                                                                                                                                                                                                                                                                                                                                                                                                                                                                                                                                                                                                                                                                                                                                                                                                                                                                                                | MB              |
| <p>Until submission of the guidelines for publication, I understand and agree that without special exception from ASH, any of the following will disqualify me from continued participation and I will not enter into:</p> <ul style="list-style-type: none"> <li>• Any <b>direct financial interest</b> of myself or my partner or spouse in any <b>for-profit healthcare company or companies</b>, if such interests in aggregate may be reasonably valued to be &gt;\$5,000/year, regardless of relevance to the guidelines</li> <li>• Any noneducational speaking by myself on behalf of any <b>for-profit healthcare company</b> (e.g., service on a company “speakers bureau”), regardless of relevance to the guidelines</li> <li>• Consulting or advising about the marketing of products by any <b>for-profit healthcare company</b> (e.g., service on a company “advisory board”), regardless of relevance to the guidelines</li> <li>• Simultaneous participation on guidelines by another organization on the same topic</li> <li>• Any <i>undisclosed</i> financial interest in any <b>for-profit healthcare company</b> occurring in the 24 months prior to my participation on these guidelines</li> </ul> | MB              |
| I understand that if a disqualifying interest is reported, the usual course of action will be dismissal from participation and acknowledgment within the guideline publication rather than authorship.                                                                                                                                                                                                                                                                                                                                                                                                                                                                                                                                                                                                                                                                                                                                                                                                                                                                                                                                                                                                                    | MB              |
| At regular intervals during the guideline development process, as determined by ASH, I will review my information in this Disclosure Form; provide updated disclosures; and, if requested, attest that I do not have any interests that should disqualify my participation.                                                                                                                                                                                                                                                                                                                                                                                                                                                                                                                                                                                                                                                                                                                                                                                                                                                                                                                                               | MB              |

|                                                                                                                                                                                                                             |    |
|-----------------------------------------------------------------------------------------------------------------------------------------------------------------------------------------------------------------------------|----|
| I agree to publish with the guidelines my complete disclosures, this agreement, and future attestations.                                                                                                                    | MB |
| I understand that for 1 year following initial publication of the guidelines, I am encouraged by ASH to avoid new conflicts of interest that could reduce trust in the guidelines, in accordance with my own best judgment. | MB |

Agreed by

Mary Ellene Boulos

Date

August 25, 2020

### Section 3. ASH Review Prior to Participation

For ASH Internal Use Only

| <i>Name, Role</i>                                                     | <i>Date</i>     | <i>Management Notes</i> |
|-----------------------------------------------------------------------|-----------------|-------------------------|
| Eddrika Russell, ASH staff                                            | August 28, 2020 |                         |
| Menaka Pai, MD, Ex Officio ASH<br>Guideline Oversight<br>Subcommittee | August 28, 2020 | Participation approved  |

## Section 4. Disclosures and Attestations During Participation

For ASH Internal Use Only

| <i>Disclosure or attestation</i> | <i>Date</i>      | <i>Reviewed by</i>     | <i>Management Notes</i>                                           |
|----------------------------------|------------------|------------------------|-------------------------------------------------------------------|
| Attestation                      | July 14, 2021    | Russell                | Ms. Boulos agreed to adhere to the policies described herein.     |
| Attestation                      | October 2, 2021  | Russell                | Ms. Boulos agreed to adhere to the policies described herein.     |
| Attestation                      | January 18, 2022 | Deion Smith, ASH Staff | Ms. Boulos agreed to adhere to the policies described herein.     |
|                                  | March 3, 2022    | Smith                  | Ms. Boulos confirmed that all information in the form is correct. |



ASH Clinical Practice Guidelines  
Participant Information

---

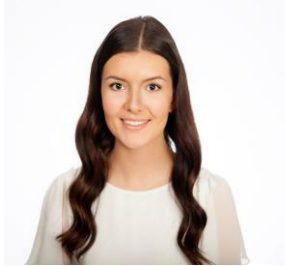

Emma Cain, HBSc

Medical Student

McMaster University

Guelph, Ontario, Canada

---

### Project

ASH Clinical Practice Guidelines on Anticoagulation in Patients with COVID-19

### Role

Review Team Member

### Profile

Ms. Emma Cain is from Guelph, Ontario where she grew up and attended the University of Guelph. She received her Bachelor of Science with a major in Bio-Medical Science in 2019 and began medical school at the Michael G. DeGroot School of Medicine at McMaster University from which she is expected to graduate in the spring of 2022.

[August 6, 2020 profile approved by Ms. Cain]



## Section 1. Disclosures Prior to Participation

### Definitions

**Conflict of interest**

A situation in which a reasonable person would consider that an individual’s judgments or actions regarding any aspect of the guideline development process is, or could be perceived to be, influenced by an outside interest

**Financial interest**

A position or relationship held by an individual that offers potential gain or loss of monetary value, such as employment, stock ownership, payment for services, or gifts given with the expectation of reciprocity

**Direct financial interest**

A financial interest that is owned by the individual or received directly by the individual

**Indirect financial interest**

A financial interest that is owned or received via an intermediary, e.g., research funding to an individual received through the individual’s academic institution

**For-profit healthcare company**

“A for-profit entity that develops, produces, markets, or distributes drugs, devices, services, or therapies used to diagnose, treat, monitor, manage, and alleviate health conditions. This definition is not intended to include non-profit entities, entities outside of the healthcare sector, or entities through which physicians provide clinical services directly to patients” (Council of Medical Specialty Societies’ “Code for Interactions With Industry” 2015). This definition is furthermore not viewed by ASH to include companies that provide accredited continuing medical education or that publish scientific or educational content.

### Part A. Direct Financial Interests

#### Employment With For-Profit Healthcare Companies

1. Are you currently or in the past 24 months have you been an employee of any **for-profit healthcare company**?

No

Yes, as described below:

Add rows as needed for each employment relationship.

| <i>Company</i> | <i>Description</i> | <i>End Date</i> | <i>For ASH Internal Use</i> |
|----------------|--------------------|-----------------|-----------------------------|
|                |                    |                 |                             |

### Equity in For-Profit Healthcare Companies

2. Do you currently or in the past 24 months have you had equity in any **for-profit healthcare company**? Equity includes stock, stock options, and other ownership interests but excludes diversified mutual fund shares.

No

Yes, as described below:

Add rows as needed for each equity interest.

| <i>Company</i> | <i>Description</i> | <i>Date Divested</i> | <i>For ASH Internal Use</i> |
|----------------|--------------------|----------------------|-----------------------------|
|                |                    |                      |                             |

### Healthcare-Related Patents, Royalties, and Other Intellectual Property

3. Do you currently or in the past 24 months have you owned patents for or received royalties from any intellectual property or product used to diagnose, treat, monitor, manage, or alleviate health conditions?

No

Yes, as described below:

Add rows as needed for each patent or royalty interest.

| <i>Company</i> | <i>Description</i> | <i>Date Divested</i> | <i>For ASH Internal Use</i> |
|----------------|--------------------|----------------------|-----------------------------|
|                |                    |                      |                             |

### Personal Income or Other Direct Transfers of Value From For-Profit Healthcare Companies

4. Do you currently or in the past 24 months have you received any personal income or other direct transfers of value (e.g., honoraria, gifts, travel support, meeting registration, meals) from any **for-profit healthcare company**?

No

Yes, as described below:

Column 1 Name the company.

Column 2 Describe the activity for which you received the income or other transfer of value, e.g., research, consultancy, speakers bureau involvement, service on an advisory committee or board, expert testimony.

Column 3 Indicate when the activity ended, if applicable. (If the activity has not yet ended, indicate "current" or "ongoing.")

Add rows as needed for each activity.

| <i>Company</i> | <i>Description</i> | <i>End Date</i> | <i>For ASH Internal Use</i> |
|----------------|--------------------|-----------------|-----------------------------|
|                |                    |                 |                             |

#### My Partner's or Spouse's Interests

5. Currently or in the past 24 months has *your partner or spouse* had any of the interests or relationships described in questions 1-4?

No

Yes, as described below:

Add rows as needed for each interest.

| <i>Company</i> | <i>Description</i> | <i>End Date</i> | <i>For ASH Internal Use</i> |
|----------------|--------------------|-----------------|-----------------------------|
|                |                    |                 |                             |

#### Other Relevant Direct Financial Interests

6. Do you have other current or recent (within the past 24 months) **direct financial interests** with any institution, organization, entity or individual that could be relevant to the work of developing these guidelines?

No

Yes

If yes, please explain:

## Part B. Indirect Financial Interests

### Institutional Research Funded by For-Profit Healthcare Companies

1. Through your institution, do you currently or in the past 24 months have you been involved in research funded or supported (e.g., in kind support, such as provision of a study drug) by any **for-profit healthcare company**?

No

Yes, as described below:

Column 1 Name the company funding or supporting the research.

Column 2 Briefly describe the research project.

Column 3 Describe your role: (a) national or overall principal investigator, (b) member of a steering committee of a study that does not have a principal investigator, (c) site or local investigator. If other than these options, please describe.

Column 4 Indicate when your involvement ended, if applicable. (If your involvement has not yet ended, indicate “current” or “ongoing.”)

Add rows as needed for each research project.

| <i>Company</i> | <i>Description of Research</i> | <i>My Role</i> | <i>End Date</i> | <i>For ASH Internal Use</i> |
|----------------|--------------------------------|----------------|-----------------|-----------------------------|
|                |                                |                |                 |                             |

### Paid and Volunteer Activities for Organizations Supported by For-Profit Healthcare Companies

2. Do you currently or in the past 24 months have you been involved in any volunteer or paid work for an organization that is wholly or partially funded by any **for-profit healthcare company**?

No

Yes, as described below:

Column 1 Name the organization. If known to you, describe any industry funding or support.

Column 2 Briefly describe your activity and role, e.g., employment, service on board of directors, other volunteer services.

Column 3 Indicate if your activity was paid or volunteered.

Column 4 Indicate when your involvement with the organization ended. (If your involvement has not yet ended, indicate “current” or “ongoing.”)

Add rows as needed for each organization.

| <i>Organization</i> | <i>Description and role</i> | <i>Paid or Unpaid?</i> | <i>End Date</i> | <i>For ASH Internal Use</i> |
|---------------------|-----------------------------|------------------------|-----------------|-----------------------------|
|                     |                             |                        |                 |                             |

Other Relevant Indirect Financial Interests

3. Do you have other **indirect financial interests** with any: (i) **for-profit healthcare** company; or (ii) other institution, organization, entity or individual that could be relevant to the work of developing these guidelines?

No

Yes

If yes, please explain:

## Part C. Relevant Other Interests That Are Not Mainly Financial

### Personal Beliefs

1. Do you have strongly held beliefs related to the topic of these guidelines?

No

Yes

If yes, please explain:

### Previously Published Opinions

2. Have you ever authored, coauthored, or publicly provided an opinion related to the topic of these guidelines, e.g., a clinical practice guideline, textbook, review article, meeting poster or presentation, grand rounds talk, letter to the editor?

No

Yes

If yes, what were those views and where were they made?

### Non-Industry Supported Research

3. Currently or in the past 24 months, have you been involved in a leadership role in any research project not already reported under Part B, Question 1, relevant to the topic of these guidelines, e.g., a research project funded by a nonprofit or governmental organization?

No

Yes, as described below:

Column 1 Name the entity funding the research.

Column 2 Describe the research project.

Column 3 Describe your role: (a) national or overall principal investigator, (b) member of a steering committee of a study that does not have a principal investigator, (c) site or local investigator. If other than these options, please describe.

Column 4 Indicate when your involvement ended, if applicable. (If your involvement has not yet ended, indicate "current" or "ongoing.")

Add rows as needed for each research project.

| <i>Funder</i> | <i>Description of Research</i> | <i>My Role</i> | <i>End Date</i> |
|---------------|--------------------------------|----------------|-----------------|
|               |                                |                |                 |

### Institutional Relationships

4. Could your compensation be affected by recommendations on this topic?

Don't know

No

Yes

If yes, please explain:

5. Do you generate revenues for your institution or employer by clinical activity, teaching, speaking, consulting, testifying, writing, or otherwise sharing your knowledge or opinions about this guideline topic?

Don't know

No

Yes

If yes, please explain:

6. Could your institution benefit or be harmed by guidelines on this topic?

Don't know

No

Yes

If yes, please explain:

### Career Advancement

7. How would you characterize the support you would receive from your primary mentor, institution, or other entities if your work on this panel or authorship of these guidelines generated a strong reaction from peers outside your institution?

I am not aware of how my institution would support me if the guidelines generated a strong reaction from peers; however, I do not believe this is relevant to me.

Involvement in Organizations With Relevant Policies, Positions, or Guidelines

8. Are you involved as an employee, volunteer, or member of any organization that has published or to your knowledge is currently developing policies, positions, or guidelines relevant to these ASH guidelines, e.g., clinical practice guidelines, appropriate use criteria, expert consensus statement, mission statement, advocacy statement, amicus brief, or legislature or legal testimony?

No

Yes, as described below:

Column 1 Name the organization.

Column 2 Describe or reference the relevant policy, position, or guidelines.

Column 3 Describe your role with the organization, including your involvement in developing, disseminating, or implementing the relevant policy, position, or guidelines.

Add rows as needed for each organization.

| <i>Organization</i> | <i>Relevant Policy Position</i> | <i>Your Role</i> |
|---------------------|---------------------------------|------------------|
|                     |                                 |                  |

Clinical Practice

9. Do you see patients clinically?

No

Yes

If yes, what is your primary specialty or subspecialty?

If yes, do you prescribe or otherwise recommend clinical interventions (e.g., screening or diagnostic tests, evaluations, treatments, procedures) that may be addressed by these guidelines?

No

Yes

If yes, please explain:

Other

10. Do you have other nonfinancial interests or relationships not described above that could be relevant to the work of developing these guidelines?



No

Yes

If yes, please describe:

#### Expected Interests

11. Do you expect to enter into, within the next 24 months, any new **financial or nonfinancial interests** not described above that could be relevant to the work of developing these guidelines?

No

Yes

If yes, please describe:

## Section 2. Attestation of Compliance With Conflict of Interest Policies

In consideration of my participation on these guidelines, I hereby certify and agree that:

| <i>Policy</i>                                                                                                                                                                                                                                                                                                                                                                                                                                                                                                                                                                                                                                                                                                                                                                                                                                                                                                                                                                                                                                                                                                                                                                                                             | <i>Initials</i> |
|---------------------------------------------------------------------------------------------------------------------------------------------------------------------------------------------------------------------------------------------------------------------------------------------------------------------------------------------------------------------------------------------------------------------------------------------------------------------------------------------------------------------------------------------------------------------------------------------------------------------------------------------------------------------------------------------------------------------------------------------------------------------------------------------------------------------------------------------------------------------------------------------------------------------------------------------------------------------------------------------------------------------------------------------------------------------------------------------------------------------------------------------------------------------------------------------------------------------------|-----------------|
| I have reviewed and understand the ASH Principles and Policies on Conflict of Interest published on the ASH website at <a href="https://www.hematology.org/about/governance/conflict-of-interest">https://www.hematology.org/about/governance/conflict-of-interest</a> including the special Policy on Management of Conflicts in the Development of Clinical Practice Guidelines (“ASH Policy”).                                                                                                                                                                                                                                                                                                                                                                                                                                                                                                                                                                                                                                                                                                                                                                                                                         | EC              |
| I have disclosed and will continue to disclose completely all potential conflicts of interest for myself and for my partner or spouse, to the best of my ability and knowledge, in accordance with ASH Policy and this Disclosure Form.                                                                                                                                                                                                                                                                                                                                                                                                                                                                                                                                                                                                                                                                                                                                                                                                                                                                                                                                                                                   | EC              |
| To ensure completeness and avoid discrepancies, I have checked and periodically will check my financial disclosures against other published information, including from the U.S. Centers for Medicare and Medicaid Services’ Open Payments database (or similar non-U.S. database) and explain any discrepant information.                                                                                                                                                                                                                                                                                                                                                                                                                                                                                                                                                                                                                                                                                                                                                                                                                                                                                                | EC              |
| <p>Until submission of the guidelines for publication, I understand and agree that without special exception from ASH, any of the following will disqualify me from continued participation and I will not enter into:</p> <ul style="list-style-type: none"> <li>• Any <b>direct financial interest</b> of myself or my partner or spouse in any <b>for-profit healthcare company or companies</b>, if such interests in aggregate may be reasonably valued to be &gt;\$5,000/year, regardless of relevance to the guidelines</li> <li>• Any noneducational speaking by myself on behalf of any <b>for-profit healthcare company</b> (e.g., service on a company “speakers bureau”), regardless of relevance to the guidelines</li> <li>• Consulting or advising about the marketing of products by any <b>for-profit healthcare company</b> (e.g., service on a company “advisory board”), regardless of relevance to the guidelines</li> <li>• Simultaneous participation on guidelines by another organization on the same topic</li> <li>• Any <i>undisclosed</i> financial interest in any <b>for-profit healthcare company</b> occurring in the 24 months prior to my participation on these guidelines</li> </ul> | EC              |
| I understand that if a disqualifying interest is reported, the usual course of action will be dismissal from participation and acknowledgment within the guideline publication rather than authorship.                                                                                                                                                                                                                                                                                                                                                                                                                                                                                                                                                                                                                                                                                                                                                                                                                                                                                                                                                                                                                    | EC              |
| At regular intervals during the guideline development process, as determined by ASH, I will review my information in this Disclosure Form; provide updated disclosures; and, if requested, attest that I do not have any interests that should disqualify my participation.                                                                                                                                                                                                                                                                                                                                                                                                                                                                                                                                                                                                                                                                                                                                                                                                                                                                                                                                               | EC              |

|                                                                                                                                                                                                                             |    |
|-----------------------------------------------------------------------------------------------------------------------------------------------------------------------------------------------------------------------------|----|
| I agree to publish with the guidelines my complete disclosures, this agreement, and future attestations.                                                                                                                    | EC |
| I understand that for 1 year following initial publication of the guidelines, I am encouraged by ASH to avoid new conflicts of interest that could reduce trust in the guidelines, in accordance with my own best judgment. | EC |

Agreed by

Emma Cain

Date

July 31<sup>st</sup> 2020

### Section 3. ASH Review Prior to Participation

For ASH Internal Use Only

| <i>Name, Role</i>                                                     | <i>Date</i>    | <i>Management Notes</i> |
|-----------------------------------------------------------------------|----------------|-------------------------|
| Eddrika Russell, ASH Staff                                            | August 4, 2020 |                         |
| Menaka Pai, MD, Ex Officio ASH<br>Guideline Oversight<br>Subcommittee | August 4, 2020 | Participation approved  |

## Section 4. Disclosures and Attestations During Participation

For ASH Internal Use Only

| <i>Disclosure or attestation</i> | <i>Date</i>      | <i>Reviewed by</i>     | <i>Management Notes</i>                                          |
|----------------------------------|------------------|------------------------|------------------------------------------------------------------|
| Attestation                      | October 6, 2021  | Russell                | Ms. Cain agreed to adhere to the policies described herein.      |
| Attestation                      | January 28, 2022 | Deion Smith, ASH Staff | Ms. Cain agreed to adhere to the policies described herein.      |
|                                  | April 2, 2022    | Smith                  | Ms. Cain confirmed that all information in this form is correct. |



ASH Clinical Practice Guidelines  
Participant Information

---

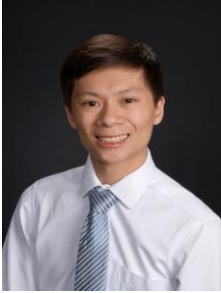

## Matthew Chan, MD

PGY 3 Internal Medicine Resident

McMaster University

Hamilton, Ontario, Canada

---

### Project

ASH Clinical Practice Guidelines on Anticoagulation in Patients with COVID-19

### Role

Review Team Member

### Profile

Dr. Matthew Chan is a PGY 3 Internal Medicine Resident at the McMaster University. After graduating from Queen's University in Life Sciences, he completed his medical school training at McMaster University. His clinical research interests include medical education, curriculum development and evidence-based medicine.

[July 17, 2020 profile approved by Dr. Chan]

# 1. Disclosures Prior to Participation

## Definitions

- Conflict of interest** A situation in which a reasonable person would consider that an individual’s judgments or actions regarding any aspect of the guideline development process is, or could be perceived to be, influenced by an outside interest
- Financial interest** A position or relationship held by an individual that offers potential gain or loss of monetary value, such as employment, stock ownership, payment for services, or gifts given with the expectation of reciprocity
- Direct financial interest** A financial interest that is owned by the individual or received directly by the individual
- Indirect financial interest** A financial interest that is owned or received via an intermediary, e.g., research funding to an individual received through the individual’s academic institution
- For-profit healthcare company** “A for-profit entity that develops, produces, markets, or distributes drugs, devices, services, or therapies used to diagnose, treat, monitor, manage, and alleviate health conditions. This definition is not intended to include non-profit entities, entities outside of the healthcare sector, or entities through which physicians provide clinical services directly to patients” (Council of Medical Specialty Societies’ “Code for Interactions With Industry” 2015). This definition is furthermore not viewed by ASH to include companies that provide accredited continuing medical education or that publish scientific or educational content.

## Part A. Direct Financial Interests

### Employment With For-Profit Healthcare Companies

1. Are you currently or in the past 24 months have you been an employee of any **for-profit healthcare company**?

No

Yes, as described below:

Add rows as needed for each employment relationship.

| <i>Company</i> | <i>Description</i> | <i>End Date</i> | <i>For ASH Internal Use</i> |
|----------------|--------------------|-----------------|-----------------------------|
|                |                    |                 |                             |

### Equity in For-Profit Healthcare Companies

2. Do you currently or in the past 24 months have you had equity in any **for-profit healthcare company**? Equity includes stock, stock options, and other ownership interests but excludes diversified mutual fund shares.

No

Yes, as described below:

Add rows as needed for each equity interest.

| <i>Company</i> | <i>Description</i> | <i>Date Divested</i> | <i>For ASH Internal Use</i> |
|----------------|--------------------|----------------------|-----------------------------|
|                |                    |                      |                             |

### Healthcare-Related Patents, Royalties, and Other Intellectual Property

3. Do you currently or in the past 24 months have you owned patents for or received royalties from any intellectual property or product used to diagnose, treat, monitor, manage, or alleviate health conditions?

No

Yes, as described below:

Add rows as needed for each patent or royalty interest.

| <i>Company</i> | <i>Description</i> | <i>Date Divested</i> | <i>For ASH Internal Use</i> |
|----------------|--------------------|----------------------|-----------------------------|
|                |                    |                      |                             |

### Personal Income or Other Direct Transfers of Value From For-Profit Healthcare Companies

4. Do you currently or in the past 24 months have you received any personal income or other direct transfers of value (e.g., honoraria, gifts, travel support, meeting registration, meals) from any **for-profit healthcare company**?

No

Yes, as described below:

Column 1 Name the company.

Column 2 Describe the activity for which you received the income or other transfer of value, e.g., research, consultancy, speakers bureau involvement, service on an advisory committee or board, expert testimony.

Column 3 Indicate when the activity ended, if applicable. (If the activity has not yet ended, indicate "current" or "ongoing.")



Add rows as needed for each activity.

| <i>Company</i> | <i>Description</i> | <i>End Date</i> | <i>For ASH Internal Use</i> |
|----------------|--------------------|-----------------|-----------------------------|
|                |                    |                 |                             |

#### My Partner's or Spouse's Interests

5. Currently or in the past 24 months has *your partner or spouse* had any of the interests or relationships described in questions 1-4?

No

Yes, as described below:

Add rows as needed for each interest.

| <i>Company</i> | <i>Description</i> | <i>End Date</i> | <i>For ASH Internal Use</i> |
|----------------|--------------------|-----------------|-----------------------------|
|                |                    |                 |                             |

#### Other Relevant Direct Financial Interests

6. Do you have other current or recent (within the past 24 months) **direct financial interests** with any institution, organization, entity or individual that could be relevant to the work of developing these guidelines?

No

Yes

If yes, please explain:

## Part B. Indirect Financial Interests

### Institutional Research Funded by For-Profit Healthcare Companies

1. Through your institution, do you currently or in the past 24 months have you been involved in research funded or supported (e.g., in kind support, such as provision of a study drug) by any **for-profit healthcare company**?

No

Yes, as described below:

Column 1 Name the company funding or supporting the research.

Column 2 Briefly describe the research project.

Column 3 Describe your role: (a) national or overall principal investigator, (b) member of a steering committee of a study that does not have a principal investigator, (c) site or local investigator. If other than these options, please describe.

Column 4 Indicate when your involvement ended, if applicable. (If your involvement has not yet ended, indicate “current” or “ongoing.”)

Add rows as needed for each research project.

| <i>Company</i> | <i>Description of Research</i> | <i>My Role</i> | <i>End Date</i> | <i>For ASH Internal Use</i> |
|----------------|--------------------------------|----------------|-----------------|-----------------------------|
|                |                                |                |                 |                             |

### Paid and Volunteer Activities for Organizations Supported by For-Profit Healthcare Companies

2. Do you currently or in the past 24 months have you been involved in any volunteer or paid work for an organization that is wholly or partially funded by any **for-profit healthcare company**?

No

Yes, as described below:

Column 1 Name the organization. If known to you, describe any industry funding or support.

Column 2 Briefly describe your activity and role, e.g., employment, service on board of directors, other volunteer services.

Column 3 Indicate if your activity was paid or volunteered.

Column 4 Indicate when your involvement with the organization ended. (If your involvement has not yet ended, indicate “current” or “ongoing.”)

Add rows as needed for each organization.

| <i>Organization</i> | <i>Description and role</i> | <i>Paid or Unpaid?</i> | <i>End Date</i> | <i>For ASH Internal Use</i> |
|---------------------|-----------------------------|------------------------|-----------------|-----------------------------|
|                     |                             |                        |                 |                             |

Other Relevant Indirect Financial Interests

3. Do you have other **indirect financial interests** with any: (i) **for-profit healthcare** company; or (ii) other institution, organization, entity or individual that could be relevant to the work of developing these guidelines?

No

Yes

If yes, please explain:

## Part C. Relevant Other Interests That Are Not Mainly Financial

### Personal Beliefs

1. Do you have strongly held beliefs related to the topic of these guidelines?

No

Yes

If yes, please explain:

### Previously Published Opinions

2. Have you ever authored, coauthored, or publicly provided an opinion related to the topic of these guidelines, e.g., a clinical practice guideline, textbook, review article, meeting poster or presentation, grand rounds talk, letter to the editor?

No

Yes

If yes, what were those views and where were they made?

### Non-Industry Supported Research

3. Currently or in the past 24 months, have you been involved in a leadership role in any research project not already reported under Part B, Question 1, relevant to the topic of these guidelines, e.g., a research project funded by a nonprofit or governmental organization?

No

Yes, as described below:

Column 1 Name the entity funding the research.

Column 2 Describe the research project.

Column 3 Describe your role: (a) national or overall principal investigator, (b) member of a steering committee of a study that does not have a principal investigator, (c) site or local investigator. If other than these options, please describe.

Column 4 Indicate when your involvement ended, if applicable. (If your involvement has not yet ended, indicate "current" or "ongoing.")

Add rows as needed for each research project.

| <i>Funder</i> | <i>Description of Research</i> | <i>My Role</i> | <i>End Date</i> |
|---------------|--------------------------------|----------------|-----------------|
|               |                                |                |                 |

### Institutional Relationships

4. Could your compensation be affected by recommendations on this topic?

Don't know

No

Yes

If yes, please explain:

5. Do you generate revenues for your institution or employer by clinical activity, teaching, speaking, consulting, testifying, writing, or otherwise sharing your knowledge or opinions about this guideline topic?

Don't know

No

Yes

If yes, please explain:

6. Could your institution benefit or be harmed by guidelines on this topic?

Don't know

No

Yes

If yes, please explain:

### Career Advancement

7. How would you characterize the support you would receive from your primary mentor, institution, or other entities if your work on this panel or authorship of these guidelines generated a strong reaction from peers outside your institution?

Supportive.

### Involvement in Organizations With Relevant Policies, Positions, or Guidelines

8. Are you involved as an employee, volunteer, or member of any organization that has published or to your knowledge is currently developing policies, positions, or guidelines relevant to these ASH guidelines, e.g., clinical practice guidelines, appropriate use criteria, expert consensus statement, mission statement, advocacy statement, amicus brief, or legislature or legal testimony?

No

Yes, as described below:

Column 1 Name the organization.

Column 2 Describe or reference the relevant policy, position, or guidelines.

Column 3 Describe your role with the organization, including your involvement in developing, disseminating, or implementing the relevant policy, position, or guidelines.

Add rows as needed for each organization.

| <i>Organization</i> | <i>Relevant Policy Position</i> | <i>Your Role</i> |
|---------------------|---------------------------------|------------------|
|                     |                                 |                  |

### Clinical Practice

9. Do you see patients clinically?

No

Yes

If yes, what is your primary specialty or subspecialty?

Internal Medicine

If yes, do you prescribe or otherwise recommend clinical interventions (e.g., screening or diagnostic tests, evaluations, treatments, procedures) that may be addressed by these guidelines?

No

Yes

If yes, please explain:

DVT prevention remains a important cornerstone of inpatient care.

### Other

10. Do you have other nonfinancial interests or relationships not described above that could be relevant to the work of developing these guidelines?

No

Yes

If yes, please describe:

### Expected Interests

11. Do you expect to enter into, within the next 24 months, any new **financial or nonfinancial interests** not described above that could be relevant to the work of developing these guidelines?

No

Yes

If yes, please describe:

## Section 2. Attestation of Compliance With Conflict of Interest Policies

In consideration of my participation on these guidelines, I hereby certify and agree that:

| <i>Policy</i>                                                                                                                                                                                                                                                                                                                                                                                                                                                                                                                                                                                                                                                                                                                                                                                                                                                                                                                                                                                                                                                                                                                                                                                                             | <i>Initials</i> |
|---------------------------------------------------------------------------------------------------------------------------------------------------------------------------------------------------------------------------------------------------------------------------------------------------------------------------------------------------------------------------------------------------------------------------------------------------------------------------------------------------------------------------------------------------------------------------------------------------------------------------------------------------------------------------------------------------------------------------------------------------------------------------------------------------------------------------------------------------------------------------------------------------------------------------------------------------------------------------------------------------------------------------------------------------------------------------------------------------------------------------------------------------------------------------------------------------------------------------|-----------------|
| I have reviewed and understand the ASH Principles and Policies on Conflict of Interest published on the ASH website at <a href="https://www.hematology.org/about/governance/conflict-of-interest">https://www.hematology.org/about/governance/conflict-of-interest</a> including the special Policy on Management of Conflicts in the Development of Clinical Practice Guidelines (“ASH Policy”).                                                                                                                                                                                                                                                                                                                                                                                                                                                                                                                                                                                                                                                                                                                                                                                                                         | MC              |
| I have disclosed and will continue to disclose completely all potential conflicts of interest for myself and for my partner or spouse, to the best of my ability and knowledge, in accordance with ASH Policy and this Disclosure Form.                                                                                                                                                                                                                                                                                                                                                                                                                                                                                                                                                                                                                                                                                                                                                                                                                                                                                                                                                                                   | MC              |
| To ensure completeness and avoid discrepancies, I have checked and periodically will check my financial disclosures against other published information, including from the U.S. Centers for Medicare and Medicaid Services’ Open Payments database (or similar non-U.S. database) and explain any discrepant information.                                                                                                                                                                                                                                                                                                                                                                                                                                                                                                                                                                                                                                                                                                                                                                                                                                                                                                | MC              |
| <p>Until submission of the guidelines for publication, I understand and agree that without special exception from ASH, any of the following will disqualify me from continued participation and I will not enter into:</p> <ul style="list-style-type: none"> <li>• Any <b>direct financial interest</b> of myself or my partner or spouse in any <b>for-profit healthcare company or companies</b>, if such interests in aggregate may be reasonably valued to be &gt;\$5,000/year, regardless of relevance to the guidelines</li> <li>• Any noneducational speaking by myself on behalf of any <b>for-profit healthcare company</b> (e.g., service on a company “speakers bureau”), regardless of relevance to the guidelines</li> <li>• Consulting or advising about the marketing of products by any <b>for-profit healthcare company</b> (e.g., service on a company “advisory board”), regardless of relevance to the guidelines</li> <li>• Simultaneous participation on guidelines by another organization on the same topic</li> <li>• Any <i>undisclosed</i> financial interest in any <b>for-profit healthcare company</b> occurring in the 24 months prior to my participation on these guidelines</li> </ul> | MC              |
| I understand that if a disqualifying interest is reported, the usual course of action will be dismissal from participation and acknowledgment within the guideline publication rather than authorship.                                                                                                                                                                                                                                                                                                                                                                                                                                                                                                                                                                                                                                                                                                                                                                                                                                                                                                                                                                                                                    | MC              |
| At regular intervals during the guideline development process, as determined by ASH, I will review my information in this Disclosure Form; provide updated disclosures; and, if requested, attest that I do not have any interests that should disqualify my participation.                                                                                                                                                                                                                                                                                                                                                                                                                                                                                                                                                                                                                                                                                                                                                                                                                                                                                                                                               | MC              |



|                                                                                                                                                                                                                             |    |
|-----------------------------------------------------------------------------------------------------------------------------------------------------------------------------------------------------------------------------|----|
| I agree to publish with the guidelines my complete disclosures, this agreement, and future attestations.                                                                                                                    | MC |
| I understand that for 1 year following initial publication of the guidelines, I am encouraged by ASH to avoid new conflicts of interest that could reduce trust in the guidelines, in accordance with my own best judgment. | MC |

Agreed by

Matthew Chan

Date

July 8<sup>th</sup> 2020

### Section 3. ASH Review Prior to Participation

For ASH Internal Use Only

| <i>Name, Role</i>                                                     | <i>Date</i>   | <i>Management Notes</i> |
|-----------------------------------------------------------------------|---------------|-------------------------|
| Eddrika Russell, ASH staff                                            | July 16, 2020 |                         |
| Menaka Pai, MD, Ex Officio ASH<br>Guideline Oversight<br>Subcommittee | July 16, 2020 | Participation approved  |

## Section 4. Disclosures and Attestations During Participation

For ASH Internal Use Only

| <i>Disclosure or attestation</i> | <i>Date</i>     | <i>Reviewed by</i>     | <i>Management Notes</i>                                         |
|----------------------------------|-----------------|------------------------|-----------------------------------------------------------------|
| Attestation                      | July 3, 2021    | Russell                | Dr. Chan agreed to adhere to the policies described herein.     |
| Attestation                      | October 5, 2021 | Russell                | Dr. Chan agreed to adhere to the policies described herein.     |
|                                  | April 3, 2022   | Deion Smith, ASH Staff | Dr. Chan confirmed that all information in the form is correct. |



ASH Clinical Practice Guidelines  
Participant Information

---

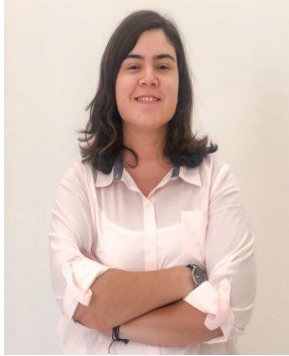

Rana Charide, BS, MPH

Research Coordinator

McMaster University, Department of Health Research Methods, Evidence, and Impact

Ontario, Canada

---

### Project

ASH Clinical Practice Guidelines on Anticoagulation in Patients with COVID-19

### Role

Review Team Member

### Profile

Ms. Rana Charide is a Research Coordinator at McMaster University. She holds a BS in Medical Laboratory Sciences and has completed her Master's in Public Health concentrating in Epidemiology & Biostatistics. She has extensive research experience, specifically in systematic, rapid and scoping reviews, gap maps and guidelines development. Her research interests are in methods for conducting, reporting and appraising evidence synthesis, clinical epidemiology and knowledge translation.

[September 14, 2020 profile approved by Ms. Charide]

## Section 1. Disclosures Prior to Participation

### Definitions

|                                             |                                                                                                                                                                                                                                                                                                                                                                                                                                                                                                                                                                                                                                                             |
|---------------------------------------------|-------------------------------------------------------------------------------------------------------------------------------------------------------------------------------------------------------------------------------------------------------------------------------------------------------------------------------------------------------------------------------------------------------------------------------------------------------------------------------------------------------------------------------------------------------------------------------------------------------------------------------------------------------------|
| <b><i>Conflict of interest</i></b>          | A situation in which a reasonable person would consider that an individual’s judgments or actions regarding any aspect of the guideline development process is, or could be perceived to be, influenced by an outside interest                                                                                                                                                                                                                                                                                                                                                                                                                              |
| <b><i>Financial interest</i></b>            | A position or relationship held by an individual that offers potential gain or loss of monetary value, such as employment, stock ownership, payment for services, or gifts given with the expectation of reciprocity                                                                                                                                                                                                                                                                                                                                                                                                                                        |
| <b><i>Direct financial interest</i></b>     | A financial interest that is owned by the individual or received directly by the individual                                                                                                                                                                                                                                                                                                                                                                                                                                                                                                                                                                 |
| <b><i>Indirect financial interest</i></b>   | A financial interest that is owned or received via an intermediary, e.g., research funding to an individual received through the individual’s academic institution                                                                                                                                                                                                                                                                                                                                                                                                                                                                                          |
| <b><i>For-profit healthcare company</i></b> | “A for-profit entity that develops, produces, markets, or distributes drugs, devices, services, or therapies used to diagnose, treat, monitor, manage, and alleviate health conditions. This definition is not intended to include non-profit entities, entities outside of the healthcare sector, or entities through which physicians provide clinical services directly to patients” (Council of Medical Specialty Societies’ “Code for Interactions With Industry” 2015). This definition is furthermore not viewed by ASH to include companies that provide accredited continuing medical education or that publish scientific or educational content. |

### Part A. Direct Financial Interests

#### Employment With For-Profit Healthcare Companies

1. Are you currently or in the past 24 months have you been an employee of any **for-profit healthcare company**?

No

Yes, as described below:

Add rows as needed for each employment relationship.

| <i>Company</i> | <i>Description</i> | <i>End Date</i> | <i>For ASH Internal Use</i> |
|----------------|--------------------|-----------------|-----------------------------|
|                |                    |                 |                             |

### Equity in For-Profit Healthcare Companies

2. Do you currently or in the past 24 months have you had equity in any **for-profit healthcare company**? Equity includes stock, stock options, and other ownership interests but excludes diversified mutual fund shares.

No

Yes, as described below:

Add rows as needed for each equity interest.

| <i>Company</i> | <i>Description</i> | <i>Date Divested</i> | <i>For ASH Internal Use</i> |
|----------------|--------------------|----------------------|-----------------------------|
|                |                    |                      |                             |

### Healthcare-Related Patents, Royalties, and Other Intellectual Property

3. Do you currently or in the past 24 months have you owned patents for or received royalties from any intellectual property or product used to diagnose, treat, monitor, manage, or alleviate health conditions?

No

Yes, as described below:

Add rows as needed for each patent or royalty interest.

| <i>Company</i> | <i>Description</i> | <i>Date Divested</i> | <i>For ASH Internal Use</i> |
|----------------|--------------------|----------------------|-----------------------------|
|                |                    |                      |                             |

### Personal Income or Other Direct Transfers of Value From For-Profit Healthcare Companies

4. Do you currently or in the past 24 months have you received any personal income or other direct transfers of value (e.g., honoraria, gifts, travel support, meeting registration, meals) from any **for-profit healthcare company**?

No

Yes, as described below:

Column 1 Name the company.

Column 2 Describe the activity for which you received the income or other transfer of value, e.g., research, consultancy, speakers bureau involvement, service on an advisory committee or board, expert testimony.

Column 3 Indicate when the activity ended, if applicable. (If the activity has not yet ended, indicate "current" or "ongoing.")

Add rows as needed for each activity.

| <i>Company</i> | <i>Description</i> | <i>End Date</i> | <i>For ASH Internal Use</i> |
|----------------|--------------------|-----------------|-----------------------------|
|                |                    |                 |                             |

#### My Partner's or Spouse's Interests

5. Currently or in the past 24 months has *your partner or spouse* had any of the interests or relationships described in questions 1-4?

No

Yes, as described below:

Add rows as needed for each interest.

| <i>Company</i> | <i>Description</i> | <i>End Date</i> | <i>For ASH Internal Use</i> |
|----------------|--------------------|-----------------|-----------------------------|
|                |                    |                 |                             |

#### Other Relevant Direct Financial Interests

6. Do you have other current or recent (within the past 24 months) **direct financial interests** with any institution, organization, entity or individual that could be relevant to the work of developing these guidelines?

No

Yes

If yes, please explain:

## Part B. Indirect Financial Interests

### Institutional Research Funded by For-Profit Healthcare Companies

1. Through your institution, do you currently or in the past 24 months have you been involved in research funded or supported (e.g., in kind support, such as provision of a study drug) by any **for-profit healthcare company**?

No

Yes, as described below:

Column 1 Name the company funding or supporting the research.

Column 2 Briefly describe the research project.

Column 3 Describe your role: (a) national or overall principal investigator, (b) member of a steering committee of a study that does not have a principal investigator, (c) site or local investigator. If other than these options, please describe.

Column 4 Indicate when your involvement ended, if applicable. (If your involvement has not yet ended, indicate “current” or “ongoing.”)

Add rows as needed for each research project.

| <i>Company</i> | <i>Description of Research</i> | <i>My Role</i> | <i>End Date</i> | <i>For ASH Internal Use</i> |
|----------------|--------------------------------|----------------|-----------------|-----------------------------|
|                |                                |                |                 |                             |

### Paid and Volunteer Activities for Organizations Supported by For-Profit Healthcare Companies

2. Do you currently or in the past 24 months have you been involved in any volunteer or paid work for an organization that is wholly or partially funded by any **for-profit healthcare company**?

No

Yes, as described below:

Column 1 Name the organization. If known to you, describe any industry funding or support.

Column 2 Briefly describe your activity and role, e.g., employment, service on board of directors, other volunteer services.

Column 3 Indicate if your activity was paid or volunteered.

Column 4 Indicate when your involvement with the organization ended. (If your involvement has not yet ended, indicate “current” or “ongoing.”)

Add rows as needed for each organization.



| <i>Organization</i> | <i>Description and role</i> | <i>Paid or Unpaid?</i> | <i>End Date</i> | <i>For ASH Internal Use</i> |
|---------------------|-----------------------------|------------------------|-----------------|-----------------------------|
|                     |                             |                        |                 |                             |

Other Relevant Indirect Financial Interests

3. Do you have other **indirect financial interests** with any: (i) **for-profit healthcare** company; or (ii) other institution, organization, entity or individual that could be relevant to the work of developing these guidelines?

No

Yes

If yes, please explain:

## Part C. Relevant Other Interests That Are Not Mainly Financial

### Personal Beliefs

1. Do you have strongly held beliefs related to the topic of these guidelines?

No

Yes

If yes, please explain:

### Previously Published Opinions

2. Have you ever authored, coauthored, or publicly provided an opinion related to the topic of these guidelines, e.g., a clinical practice guideline, textbook, review article, meeting poster or presentation, grand rounds talk, letter to the editor?

No

Yes

If yes, what were those views and where were they made?

Co-authored systematic reviews on the topic. No specific opinion made.

### Non-Industry Supported Research

3. Currently or in the past 24 months, have you been involved in a leadership role in any research project not already reported under Part B, Question 1, relevant to the topic of these guidelines, e.g., a research project funded by a nonprofit or governmental organization?

No

Yes, as described below:

Column 1 Name the entity funding the research.

Column 2 Describe the research project.

Column 3 Describe your role: (a) national or overall principal investigator, (b) member of a steering committee of a study that does not have a principal investigator, (c) site or local investigator. If other than these options, please describe.

Column 4 Indicate when your involvement ended, if applicable. (If your involvement has not yet ended, indicate "current" or "ongoing.")

Add rows as needed for each research project.

| <i>Funder</i> | <i>Description of Research</i> | <i>My Role</i> | <i>End Date</i> |
|---------------|--------------------------------|----------------|-----------------|
|               |                                |                |                 |

### Institutional Relationships

4. Could your compensation be affected by recommendations on this topic?

Don't know

No

Yes

If yes, please explain:

5. Do you generate revenues for your institution or employer by clinical activity, teaching, speaking, consulting, testifying, writing, or otherwise sharing your knowledge or opinions about this guideline topic?

Don't know

No

Yes

If yes, please explain:

6. Could your institution benefit or be harmed by guidelines on this topic?

Don't know

No

Yes

If yes, please explain:

### Career Advancement

7. How would you characterize the support you would receive from your primary mentor, institution, or other entities if your work on this panel or authorship of these guidelines generated a strong reaction from peers outside your institution?

No effect or change. My current type of work at my institution is not related to this guideline and can't be affected by it in any way.

### Involvement in Organizations With Relevant Policies, Positions, or Guidelines

8. Are you involved as an employee, volunteer, or member of any organization that has published or to your knowledge is currently developing policies, positions, or guidelines relevant to these ASH

guidelines, e.g., clinical practice guidelines, appropriate use criteria, expert consensus statement, mission statement, advocacy statement, amicus brief, or legislature or legal testimony?

No

Yes, as described below:

Column 1 Name the organization.

Column 2 Describe or reference the relevant policy, position, or guidelines.

Column 3 Describe your role with the organization, including your involvement in developing, disseminating, or implementing the relevant policy, position, or guidelines.

Add rows as needed for each organization.

| <i>Organization</i> | <i>Relevant Policy Position</i> | <i>Your Role</i> |
|---------------------|---------------------------------|------------------|
|                     |                                 |                  |

#### Clinical Practice

9. Do you see patients clinically?

No

Yes

If yes, what is your primary specialty or subspecialty?

If yes, do you prescribe or otherwise recommend clinical interventions (e.g., screening or diagnostic tests, evaluations, treatments, procedures) that may be addressed by these guidelines?

No

Yes

If yes, please explain:

#### Other

10. Do you have other nonfinancial interests or relationships not described above that could be relevant to the work of developing these guidelines?

No

Yes

If yes, please describe:

#### Expected Interests

11. Do you expect to enter into, within the next 24 months, any new **financial or nonfinancial interests** not described above that could be relevant to the work of developing these guidelines?

No

Yes

If yes, please describe:

## Section 2. Attestation of Compliance With Conflict of Interest Policies

In consideration of my participation on these guidelines, I hereby certify and agree that:

| <i>Policy</i>                                                                                                                                                                                                                                                                                                                                                                                                                                                                                                                                                                                                                                                                                                                                                                                                                                                                                                                                                                                                                                                                                                                                                                                                             | <i>Initials</i> |
|---------------------------------------------------------------------------------------------------------------------------------------------------------------------------------------------------------------------------------------------------------------------------------------------------------------------------------------------------------------------------------------------------------------------------------------------------------------------------------------------------------------------------------------------------------------------------------------------------------------------------------------------------------------------------------------------------------------------------------------------------------------------------------------------------------------------------------------------------------------------------------------------------------------------------------------------------------------------------------------------------------------------------------------------------------------------------------------------------------------------------------------------------------------------------------------------------------------------------|-----------------|
| I have reviewed and understand the ASH Principles and Policies on Conflict of Interest published on the ASH website at <a href="https://www.hematology.org/about/governance/conflict-of-interest">https://www.hematology.org/about/governance/conflict-of-interest</a> including the special Policy on Management of Conflicts in the Development of Clinical Practice Guidelines (“ASH Policy”).                                                                                                                                                                                                                                                                                                                                                                                                                                                                                                                                                                                                                                                                                                                                                                                                                         | RC              |
| I have disclosed and will continue to disclose completely all potential conflicts of interest for myself and for my partner or spouse, to the best of my ability and knowledge, in accordance with ASH Policy and this Disclosure Form.                                                                                                                                                                                                                                                                                                                                                                                                                                                                                                                                                                                                                                                                                                                                                                                                                                                                                                                                                                                   | RC              |
| To ensure completeness and avoid discrepancies, I have checked and periodically will check my financial disclosures against other published information, including from the U.S. Centers for Medicare and Medicaid Services’ Open Payments database (or similar non-U.S. database) and explain any discrepant information.                                                                                                                                                                                                                                                                                                                                                                                                                                                                                                                                                                                                                                                                                                                                                                                                                                                                                                | RC              |
| <p>Until submission of the guidelines for publication, I understand and agree that without special exception from ASH, any of the following will disqualify me from continued participation and I will not enter into:</p> <ul style="list-style-type: none"> <li>• Any <b>direct financial interest</b> of myself or my partner or spouse in any <b>for-profit healthcare company or companies</b>, if such interests in aggregate may be reasonably valued to be &gt;\$5,000/year, regardless of relevance to the guidelines</li> <li>• Any noneducational speaking by myself on behalf of any <b>for-profit healthcare company</b> (e.g., service on a company “speakers bureau”), regardless of relevance to the guidelines</li> <li>• Consulting or advising about the marketing of products by any <b>for-profit healthcare company</b> (e.g., service on a company “advisory board”), regardless of relevance to the guidelines</li> <li>• Simultaneous participation on guidelines by another organization on the same topic</li> <li>• Any <i>undisclosed</i> financial interest in any <b>for-profit healthcare company</b> occurring in the 24 months prior to my participation on these guidelines</li> </ul> | RC              |
| I understand that if a disqualifying interest is reported, the usual course of action will be dismissal from participation and acknowledgment within the guideline publication rather than authorship.                                                                                                                                                                                                                                                                                                                                                                                                                                                                                                                                                                                                                                                                                                                                                                                                                                                                                                                                                                                                                    | RC              |
| At regular intervals during the guideline development process, as determined by ASH, I will review my information in this Disclosure Form; provide updated disclosures; and, if requested, attest that I do not have any interests that should disqualify my participation.                                                                                                                                                                                                                                                                                                                                                                                                                                                                                                                                                                                                                                                                                                                                                                                                                                                                                                                                               | RC              |

|                                                                                                                                                                                                                             |    |
|-----------------------------------------------------------------------------------------------------------------------------------------------------------------------------------------------------------------------------|----|
| I agree to publish with the guidelines my complete disclosures, this agreement, and future attestations.                                                                                                                    | RC |
| I understand that for 1 year following initial publication of the guidelines, I am encouraged by ASH to avoid new conflicts of interest that could reduce trust in the guidelines, in accordance with my own best judgment. | RC |

Agreed by [Rana Charide]

Date [August 28, 2020]

### Section 3. ASH Review Prior to Participation

For ASH Internal Use Only

| <i>Name, Role</i>                                                      | <i>Date</i>     | <i>Management Notes</i> |
|------------------------------------------------------------------------|-----------------|-------------------------|
| Eddrika Russell, ASH Staff                                             | August 31, 2020 |                         |
| Menaka Pai, MD, Ex Officio, ASH<br>Guideline Oversight<br>Subcommittee | August 31, 2020 | Participation Approved  |



## Section 4. Disclosures and Attestations During Participation

For ASH Internal Use Only

| <i>Disclosure or attestation</i> | <i>Date</i>      | <i>Reviewed by</i>     | <i>Management Notes</i>                                             |
|----------------------------------|------------------|------------------------|---------------------------------------------------------------------|
| Attestation                      | July 2, 2021     | Russell                | Ms. Charide agreed to adhere to the policies described herein.      |
| Attestation                      | October 7, 2021  | Russell                | Ms. Charide agreed to adhere to the policies described herein.      |
| Attestation                      | January 18, 2022 | Deion Smith, ASH Staff | Ms. Charide agreed to adhere to the policies described herein.      |
|                                  | April 4, 2022    | Smith                  | Ms. Charide confirmed that all information in this form is correct. |

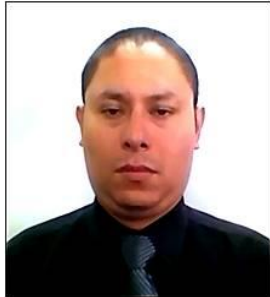

Luis Enrique Colunga Lozano, MD, MSc

Professor

Universidad de Guadalajara, Departamento de clínicas médicas, profesor de asignatura

Guadalajara, Jalisco, México

---

## Project

ASH Clinical Practice Guidelines on Anticoagulation in Patients with COVID-19

## Role

Review Team Member

## Profile

Dr. Colunga-Lozano is an internal medicine / critical care physician from Guadalajara, México. Currently, he works at a public hospital "Hospital Civil de Guadalajara - Dr. Juan I Menchaca" at the COVID-19 intensive care unit. He is, also, a junior professor in a local university (Universidad de Guadalajara) in which he teaches Evidence-Based Medicine. Dr. Colunga-Lozano has a Master's degree in Health Related Methods from McMaster University, is a member of the Cochrane Collaboration, and works closely with the GRADE working group.

[September 1, 2020 profile approved by Dr. Colunga-Lozano]

# 1. Disclosures Prior to Participation

## Definitions

- Conflict of interest** A situation in which a reasonable person would consider that an individual’s judgments or actions regarding any aspect of the guideline development process is, or could be perceived to be, influenced by an outside interest
- Financial interest** A position or relationship held by an individual that offers potential gain or loss of monetary value, such as employment, stock ownership, payment for services, or gifts given with the expectation of reciprocity
- Direct financial interest** A financial interest that is owned by the individual or received directly by the individual
- Indirect financial interest** A financial interest that is owned or received via an intermediary, e.g., research funding to an individual received through the individual’s academic institution
- For-profit healthcare company** “A for-profit entity that develops, produces, markets, or distributes drugs, devices, services, or therapies used to diagnose, treat, monitor, manage, and alleviate health conditions. This definition is not intended to include non-profit entities, entities outside of the healthcare sector, or entities through which physicians provide clinical services directly to patients” (Council of Medical Specialty Societies’ “Code for Interactions With Industry” 2015). This definition is furthermore not viewed by ASH to include companies that provide accredited continuing medical education or that publish scientific or educational content.

## Part A. Direct Financial Interests

### Employment With For-Profit Healthcare Companies

1. Are you currently or in the past 24 months have you been an employee of any **for-profit healthcare company**?

No

Yes, as described below:

Add rows as needed for each employment relationship.

| <i>Company</i> | <i>Description</i> | <i>End Date</i> | <i>For ASH Internal Use</i> |
|----------------|--------------------|-----------------|-----------------------------|
|                |                    |                 |                             |

### Equity in For-Profit Healthcare Companies

2. Do you currently or in the past 24 months have you had equity in any **for-profit healthcare company**? Equity includes stock, stock options, and other ownership interests but excludes diversified mutual fund shares.

No

Yes, as described below:

Add rows as needed for each equity interest.

| <i>Company</i> | <i>Description</i> | <i>Date Divested</i> | <i>For ASH Internal Use</i> |
|----------------|--------------------|----------------------|-----------------------------|
|                |                    |                      |                             |

### Healthcare-Related Patents, Royalties, and Other Intellectual Property

3. Do you currently or in the past 24 months have you owned patents for or received royalties from any intellectual property or product used to diagnose, treat, monitor, manage, or alleviate health conditions?

No

Yes, as described below:

Add rows as needed for each patent or royalty interest.

| <i>Company</i> | <i>Description</i> | <i>Date Divested</i> | <i>For ASH Internal Use</i> |
|----------------|--------------------|----------------------|-----------------------------|
|                |                    |                      |                             |

### Personal Income or Other Direct Transfers of Value From For-Profit Healthcare Companies

4. Do you currently or in the past 24 months have you received any personal income or other direct transfers of value (e.g., honoraria, gifts, travel support, meeting registration, meals) from any **for-profit healthcare company**?

No

Yes, as described below:

**Column 1** Name the company.

**Column 2** Describe the activity for which you received the income or other transfer of value, e.g., research, consultancy, speakers bureau involvement, service on an advisory committee or board, expert testimony.

**Column 3** Indicate when the activity ended, if applicable. (If the activity has not yet ended, indicate “current” or “ongoing.”)

Add rows as needed for each activity.

| <i>Company</i> | <i>Description</i> | <i>End Date</i> | <i>For ASH Internal Use</i> |
|----------------|--------------------|-----------------|-----------------------------|
|                |                    |                 |                             |

#### My Partner's or Spouse's Interests

5. Currently or in the past 24 months has *your partner or spouse* had any of the interests or relationships described in questions 1-4?

No

Yes, as described below:

Add rows as needed for each interest.

| <i>Company</i> | <i>Description</i> | <i>End Date</i> | <i>For ASH Internal Use</i> |
|----------------|--------------------|-----------------|-----------------------------|
|                |                    |                 |                             |

#### Other Relevant Direct Financial Interests

6. Do you have other current or recent (within the past 24 months) **direct financial interests** with any institution, organization, entity or individual that could be relevant to the work of developing these guidelines?

No

Yes

If yes, please explain:

## Part B. Indirect Financial Interests

### Institutional Research Funded by For-Profit Healthcare Companies

1. Through your institution, do you currently or in the past 24 months have you been involved in research funded or supported (e.g., in kind support, such as provision of a study drug) by any **for-profit healthcare company**?

No

Yes, as described below:

Column 1 Name the company funding or supporting the research.

Column 2 Briefly describe the research project.

Column 3 Describe your role: (a) national or overall principal investigator, (b) member of a steering committee of a study that does not have a principal investigator, (c) site or local investigator. If other than these options, please describe.

Column 4 Indicate when your involvement ended, if applicable. (If your involvement has not yet ended, indicate “current” or “ongoing.”)

Add rows as needed for each research project.

| <i>Company</i> | <i>Description of Research</i> | <i>My Role</i> | <i>End Date</i> | <i>For ASH Internal Use</i> |
|----------------|--------------------------------|----------------|-----------------|-----------------------------|
|                |                                |                |                 |                             |

### Paid and Volunteer Activities for Organizations Supported by For-Profit Healthcare Companies

2. Do you currently or in the past 24 months have you been involved in any volunteer or paid work for an organization that is wholly or partially funded by any **for-profit healthcare company**?

No

Yes, as described below:

Column 1 Name the organization. If known to you, describe any industry funding or support.

Column 2 Briefly describe your activity and role, e.g., employment, service on board of directors, other volunteer services.

Column 3 Indicate if your activity was paid or volunteered.

Column 4 Indicate when your involvement with the organization ended. (If your involvement has not yet ended, indicate “current” or “ongoing.”)

Add rows as needed for each organization.

| <i>Organization</i> | <i>Description and role</i> | <i>Paid or Unpaid?</i> | <i>End Date</i> | <i>For ASH Internal Use</i> |
|---------------------|-----------------------------|------------------------|-----------------|-----------------------------|
|                     |                             |                        |                 |                             |

Other Relevant Indirect Financial Interests

3. Do you have other **indirect financial interests** with any: (i) **for-profit healthcare** company; or (ii) other institution, organization, entity or individual that could be relevant to the work of developing these guidelines?

No

Yes

If yes, please explain:

## Part C. Relevant Other Interests That Are Not Mainly Financial

### Personal Beliefs

1. Do you have strongly held beliefs related to the topic of these guidelines?

No

Yes

If yes, please explain:

### Previously Published Opinions

2. Have you ever authored, coauthored, or publicly provided an opinion related to the topic of these guidelines, e.g., a clinical practice guideline, textbook, review article, meeting poster or presentation, grand rounds talk, letter to the editor?

No

Yes

If yes, what were those views and where were they made?

### Non-Industry Supported Research

3. Currently or in the past 24 months, have you been involved in a leadership role in any research project not already reported under Part B, Question 1, relevant to the topic of these guidelines, e.g., a research project funded by a nonprofit or governmental organization?

No

Yes, as described below:

Column 1 Name the entity funding the research.

Column 2 Describe the research project.

Column 3 Describe your role: (a) national or overall principal investigator, (b) member of a steering committee of a study that does not have a principal investigator, (c) site or local investigator. If other than these options, please describe.

Column 4 Indicate when your involvement ended, if applicable. (If your involvement has not yet ended, indicate "current" or "ongoing.")

Add rows as needed for each research project.

| <i>Funder</i> | <i>Description of Research</i> | <i>My Role</i> | <i>End Date</i> |
|---------------|--------------------------------|----------------|-----------------|
|               |                                |                |                 |



### Institutional Relationships

4. Could your compensation be affected by recommendations on this topic?

Don't know

No

Yes

If yes, please explain:

5. Do you generate revenues for your institution or employer by clinical activity, teaching, speaking, consulting, testifying, writing, or otherwise sharing your knowledge or opinions about this guideline topic?

Don't know

No

Yes

If yes, please explain:

6. Could your institution benefit or be harmed by guidelines on this topic?

Don't know

No

Yes

If yes, please explain:

### Career Advancement

7. How would you characterize the support you would receive from your primary mentor, institution, or other entities if your work on this panel or authorship of these guidelines generated a strong reaction from peers outside your institution?

Response: The support will be the same.

### Involvement in Organizations With Relevant Policies, Positions, or Guidelines

8. Are you involved as an employee, volunteer, or member of any organization that has published or to your knowledge is currently developing policies, positions, or guidelines relevant to these ASH

guidelines, e.g., clinical practice guidelines, appropriate use criteria, expert consensus statement, mission statement, advocacy statement, amicus brief, or legislature or legal testimony?

No

Yes, as described below:

Column 1 Name the organization.

Column 2 Describe or reference the relevant policy, position, or guidelines.

Column 3 Describe your role with the organization, including your involvement in developing, disseminating, or implementing the relevant policy, position, or guidelines.

Add rows as needed for each organization.

| <i>Organization</i> | <i>Relevant Policy Position</i> | <i>Your Role</i> |
|---------------------|---------------------------------|------------------|
|                     |                                 |                  |

#### Clinical Practice

9. Do you see patients clinically?

No

Yes

If yes, what is your primary specialty or subspecialty?

I am an internal medicine/critical care physician working in a public hospital at the intensive care unit.

If yes, do you prescribe or otherwise recommend clinical interventions (e.g., screening or diagnostic tests, evaluations, treatments, procedures) that may be addressed by these guidelines?

No

Yes

If yes, please explain:

Response: My hospital is a COVID-19 center and part of my clinical duty is to provide diagnostic and treatment strategies related to the current guideline topic.

#### Other

10. Do you have other nonfinancial interests or relationships not described above that could be relevant to the work of developing these guidelines?

No

Yes

If yes, please describe:

#### Expected Interests

11. Do you expect to enter into, within the next 24 months, any new **financial or nonfinancial interests** not described above that could be relevant to the work of developing these guidelines?

No

Yes

If yes, please describe:

## Section 2. Attestation of Compliance With Conflict of Interest Policies

In consideration of my participation on these guidelines, I hereby certify and agree that:

| <i>Policy</i>                                                                                                                                                                                                                                                                                                                                                                                                                                                                                                                                                                                                                                                                                                                                                                                                                                                                                                                                                                                                                                                                                                                                                                                                             | <i>Initials</i> |
|---------------------------------------------------------------------------------------------------------------------------------------------------------------------------------------------------------------------------------------------------------------------------------------------------------------------------------------------------------------------------------------------------------------------------------------------------------------------------------------------------------------------------------------------------------------------------------------------------------------------------------------------------------------------------------------------------------------------------------------------------------------------------------------------------------------------------------------------------------------------------------------------------------------------------------------------------------------------------------------------------------------------------------------------------------------------------------------------------------------------------------------------------------------------------------------------------------------------------|-----------------|
| I have reviewed and understand the ASH Principles and Policies on Conflict of Interest published on the ASH website at <a href="https://www.hematology.org/about/governance/conflict-of-interest">https://www.hematology.org/about/governance/conflict-of-interest</a> including the special Policy on Management of Conflicts in the Development of Clinical Practice Guidelines (“ASH Policy”).                                                                                                                                                                                                                                                                                                                                                                                                                                                                                                                                                                                                                                                                                                                                                                                                                         | LECL            |
| I have disclosed and will continue to disclose completely all potential conflicts of interest for myself and for my partner or spouse, to the best of my ability and knowledge, in accordance with ASH Policy and this Disclosure Form.                                                                                                                                                                                                                                                                                                                                                                                                                                                                                                                                                                                                                                                                                                                                                                                                                                                                                                                                                                                   | LECL            |
| To ensure completeness and avoid discrepancies, I have checked and periodically will check my financial disclosures against other published information, including from the U.S. Centers for Medicare and Medicaid Services’ Open Payments database (or similar non-U.S. database) and explain any discrepant information.                                                                                                                                                                                                                                                                                                                                                                                                                                                                                                                                                                                                                                                                                                                                                                                                                                                                                                | LECL            |
| <p>Until submission of the guidelines for publication, I understand and agree that without special exception from ASH, any of the following will disqualify me from continued participation and I will not enter into:</p> <ul style="list-style-type: none"> <li>• Any <b>direct financial interest</b> of myself or my partner or spouse in any <b>for-profit healthcare company or companies</b>, if such interests in aggregate may be reasonably valued to be &gt;\$5,000/year, regardless of relevance to the guidelines</li> <li>• Any noneducational speaking by myself on behalf of any <b>for-profit healthcare company</b> (e.g., service on a company “speakers bureau”), regardless of relevance to the guidelines</li> <li>• Consulting or advising about the marketing of products by any <b>for-profit healthcare company</b> (e.g., service on a company “advisory board”), regardless of relevance to the guidelines</li> <li>• Simultaneous participation on guidelines by another organization on the same topic</li> <li>• Any <i>undisclosed</i> financial interest in any <b>for-profit healthcare company</b> occurring in the 24 months prior to my participation on these guidelines</li> </ul> | LECL            |
| I understand that if a disqualifying interest is reported, the usual course of action will be dismissal from participation and acknowledgment within the guideline publication rather than authorship.                                                                                                                                                                                                                                                                                                                                                                                                                                                                                                                                                                                                                                                                                                                                                                                                                                                                                                                                                                                                                    | LECL            |
| At regular intervals during the guideline development process, as determined by ASH, I will review my information in this Disclosure Form; provide updated disclosures; and, if requested, attest that I do not have any interests that should disqualify my participation.                                                                                                                                                                                                                                                                                                                                                                                                                                                                                                                                                                                                                                                                                                                                                                                                                                                                                                                                               | LECL            |

|                                                                                                                                                                                                                             |      |
|-----------------------------------------------------------------------------------------------------------------------------------------------------------------------------------------------------------------------------|------|
| I agree to publish with the guidelines my complete disclosures, this agreement, and future attestations.                                                                                                                    | LECL |
| I understand that for 1 year following initial publication of the guidelines, I am encouraged by ASH to avoid new conflicts of interest that could reduce trust in the guidelines, in accordance with my own best judgment. | LECL |

Agreed by

Luis Enrique Colunga Lozano

Date

25/08/2020

### Section 3. ASH Review Prior to Participation

For ASH Internal Use Only

| <i>Name, Role</i>                                                     | <i>Date</i>     | <i>Management Notes</i> |
|-----------------------------------------------------------------------|-----------------|-------------------------|
| Eddrika Russell, ASH Staff                                            | August 28, 2020 |                         |
| Menaka Pai, MD, Ex Officio ASH<br>Guideline Oversight<br>Subcommittee | August 28, 2020 | Participation approved  |

## Section 4. Disclosures and Attestations During Participation

For ASH Internal Use Only

| <i>Disclosure or attestation</i> | <i>Date</i>      | <i>Reviewed by</i>     | <i>Management Notes</i>                                                   |
|----------------------------------|------------------|------------------------|---------------------------------------------------------------------------|
| Attestation                      | July 14, 2021    | Russell                | Dr. Colunga-Lozano agreed to adhere to the policies described herein.     |
| Attestation                      | October 4, 2021  | Russell                | Dr. Colunga-Lozano agreed to adhere to the policies described herein.     |
| Attestation                      | January 18, 2022 | Deion Smith, ASH Staff | Dr. Colunga-Lozano agreed to adhere to the policies described herein.     |
|                                  | March            | Smith                  | Dr. Colunga-Lozano confirmed that all information in the form is correct. |

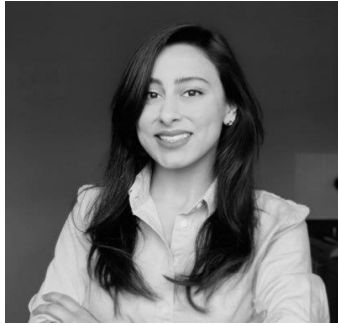

Andrea Darzi, MD, PhD, MPH

Health research methodologist

McMaster University

Hamilton, Ontario, Canada

---

## Project

ASH Clinical Practice Guidelines on Anticoagulation in Patients with COVID-19

## Role

Review Team Member

## Profile

Andrea Darzi is a health research methodologist in the Department of Health Research Methods, Evidence, and Impact at McMaster University. She has also recently started her postdoctoral fellowship at the Michael G. DeGroot National Pain Center. Prior to joining McMaster University, she was the assistant director of the American University of Beirut GRADE Center, and a member of the GRADE working group. She is a Medical Doctor (2012) and holds a Master's in Public Health concentrating in epidemiology and biostatistics (2014). Her research interests include evidence synthesis, prognosis research, and guideline development. She has contributed to the development and adaptation of guidelines for the Kingdom of Saudi Arabia Ministry of Health, with Cornell University in Qatar, WHO, the European commission and the American Society of Hematology. The scope of her PhD work is related to the identification of prognostic factors and the development of risk assessment models for VTE and bleeding in hospitalized medical patients.

[July 15, 2020 profile approved by Dr. Darzi]



## Section 1. Disclosures Prior to Participation

### Definitions

**Conflict of interest**

A situation in which a reasonable person would consider that an individual’s judgments or actions regarding any aspect of the guideline development process is, or could be perceived to be, influenced by an outside interest

**Financial interest**

A position or relationship held by an individual that offers potential gain or loss of monetary value, such as employment, stock ownership, payment for services, or gifts given with the expectation of reciprocity

**Direct financial interest**

A financial interest that is owned by the individual or received directly by the individual

**Indirect financial interest**

A financial interest that is owned or received via an intermediary, e.g., research funding to an individual received through the individual’s academic institution

**For-profit healthcare company**

“A for-profit entity that develops, produces, markets, or distributes drugs, devices, services, or therapies used to diagnose, treat, monitor, manage, and alleviate health conditions. This definition is not intended to include non-profit entities, entities outside of the healthcare sector, or entities through which physicians provide clinical services directly to patients” (Council of Medical Specialty Societies’ “Code for Interactions With Industry” 2015). This definition is furthermore not viewed by ASH to include companies that provide accredited continuing medical education or that publish scientific or educational content.

### Part A. Direct Financial Interests

#### Employment With For-Profit Healthcare Companies

1. Are you currently or in the past 24 months have you been an employee of any **for-profit healthcare company**?

No

Yes, as described below:

Add rows as needed for each employment relationship.

| <i>Company</i> | <i>Description</i> | <i>End Date</i> | <i>For ASH Internal Use</i> |
|----------------|--------------------|-----------------|-----------------------------|
|                |                    |                 |                             |

### Equity in For-Profit Healthcare Companies

2. Do you currently or in the past 24 months have you had equity in any **for-profit healthcare company**? Equity includes stock, stock options, and other ownership interests but excludes diversified mutual fund shares.

No

Yes, as described below:

Add rows as needed for each equity interest.

| <i>Company</i> | <i>Description</i> | <i>Date Divested</i> | <i>For ASH Internal Use</i> |
|----------------|--------------------|----------------------|-----------------------------|
|                |                    |                      |                             |

### Healthcare-Related Patents, Royalties, and Other Intellectual Property

3. Do you currently or in the past 24 months have you owned patents for or received royalties from any intellectual property or product used to diagnose, treat, monitor, manage, or alleviate health conditions?

No

Yes, as described below:

Add rows as needed for each patent or royalty interest.

| <i>Company</i> | <i>Description</i> | <i>Date Divested</i> | <i>For ASH Internal Use</i> |
|----------------|--------------------|----------------------|-----------------------------|
|                |                    |                      |                             |

### Personal Income or Other Direct Transfers of Value From For-Profit Healthcare Companies

4. Do you currently or in the past 24 months have you received any personal income or other direct transfers of value (e.g., honoraria, gifts, travel support, meeting registration, meals) from any **for-profit healthcare company**?

No

Yes, as described below:

Column 1 Name the company.

Column 2 Describe the activity for which you received the income or other transfer of value, e.g., research, consultancy, speakers bureau involvement, service on an advisory committee or board, expert testimony.

Column 3 Indicate when the activity ended, if applicable. (If the activity has not yet ended, indicate “current” or “ongoing.”)

Add rows as needed for each activity.

| <i>Company</i> | <i>Description</i> | <i>End Date</i> | <i>For ASH Internal Use</i> |
|----------------|--------------------|-----------------|-----------------------------|
|                |                    |                 |                             |

#### My Partner’s or Spouse’s Interests

5. Currently or in the past 24 months has *your partner or spouse* had any of the interests or relationships described in questions 1-4?

No

Yes, as described below:

Add rows as needed for each interest.

| <i>Company</i> | <i>Description</i> | <i>End Date</i> | <i>For ASH Internal Use</i> |
|----------------|--------------------|-----------------|-----------------------------|
|                |                    |                 |                             |

#### Other Relevant Direct Financial Interests

6. Do you have other current or recent (within the past 24 months) **direct financial interests** with any institution, organization, entity or individual that could be relevant to the work of developing these guidelines?

No

Yes

If yes, please explain:

## Part B. Indirect Financial Interests

### Institutional Research Funded by For-Profit Healthcare Companies

1. Through your institution, do you currently or in the past 24 months have you been involved in research funded or supported (e.g., in kind support, such as provision of a study drug) by any **for-profit healthcare company**?

No

Yes, as described below:

Column 1 Name the company funding or supporting the research.

Column 2 Briefly describe the research project.

Column 3 Describe your role: (a) national or overall principal investigator, (b) member of a steering committee of a study that does not have a principal investigator, (c) site or local investigator. If other than these options, please describe.

Column 4 Indicate when your involvement ended, if applicable. (If your involvement has not yet ended, indicate “current” or “ongoing.”)

Add rows as needed for each research project.

| <i>Company</i> | <i>Description of Research</i> | <i>My Role</i> | <i>End Date</i> | <i>For ASH Internal Use</i> |
|----------------|--------------------------------|----------------|-----------------|-----------------------------|
|                |                                |                |                 |                             |

### Paid and Volunteer Activities for Organizations Supported by For-Profit Healthcare Companies

2. Do you currently or in the past 24 months have you been involved in any volunteer or paid work for an organization that is wholly or partially funded by any **for-profit healthcare company**?

No

Yes, as described below:

Column 1 Name the organization. If known to you, describe any industry funding or support.

Column 2 Briefly describe your activity and role, e.g., employment, service on board of directors, other volunteer services.

Column 3 Indicate if your activity was paid or volunteered.

Column 4 Indicate when your involvement with the organization ended. (If your involvement has not yet ended, indicate “current” or “ongoing.”)

Add rows as needed for each organization.

| <i>Organization</i> | <i>Description and role</i> | <i>Paid or Unpaid?</i> | <i>End Date</i> | <i>For ASH Internal Use</i> |
|---------------------|-----------------------------|------------------------|-----------------|-----------------------------|
|                     |                             |                        |                 |                             |

Other Relevant Indirect Financial Interests

3. Do you have other **indirect financial interests** with any: (i) **for-profit healthcare** company; or (ii) other institution, organization, entity or individual that could be relevant to the work of developing these guidelines?

No

Yes

If yes, please explain:

## Part C. Relevant Other Interests That Are Not Mainly Financial

### Personal Beliefs

1. Do you have strongly held beliefs related to the topic of these guidelines?

No

Yes

If yes, please explain:

### Previously Published Opinions

2. Have you ever authored, coauthored, or publicly provided an opinion related to the topic of these guidelines, e.g., a clinical practice guideline, textbook, review article, meeting poster or presentation, grand rounds talk, letter to the editor?

No

Yes

If yes, what were those views and where were they made?

### Non-Industry Supported Research

3. Currently or in the past 24 months, have you been involved in a leadership role in any research project not already reported under Part B, Question 1, relevant to the topic of these guidelines, e.g., a research project funded by a nonprofit or governmental organization?

No

Yes, as described below:

Column 1 Name the entity funding the research.

Column 2 Describe the research project.

Column 3 Describe your role: (a) national or overall principal investigator, (b) member of a steering committee of a study that does not have a principal investigator, (c) site or local investigator. If other than these options, please describe.

Column 4 Indicate when your involvement ended, if applicable. (If your involvement has not yet ended, indicate "current" or "ongoing.")

Add rows as needed for each research project.

| <i>Funder</i>     | <i>Description of Research</i>                                                                                   | <i>My Role</i>               | <i>End Date</i>            |
|-------------------|------------------------------------------------------------------------------------------------------------------|------------------------------|----------------------------|
| CDC through Karna | Systematic review and meta-analysis of prognostic factors for VTE and bleeding in hospitalized medical patients. | First author and coordinator | Contract ended August 2018 |
| CDC through Karna | Risk models for VTE and bleeding in hospitalized medical patients using a novel approach.                        | First author and coordinator | Contract ended August 2018 |

### Institutional Relationships

4. Could your compensation be affected by recommendations on this topic?

Don't know

No

Yes

If yes, please explain:

5. Do you generate revenues for your institution or employer by clinical activity, teaching, speaking, consulting, testifying, writing, or otherwise sharing your knowledge or opinions about this guideline topic?

Don't know

No

Yes

If yes, please explain:

6. Could your institution benefit or be harmed by guidelines on this topic?

Don't know

No

Yes

If yes, please explain:

### Career Advancement

7. How would you characterize the support you would receive from your primary mentor, institution, or other entities if your work on this panel or authorship of these guidelines generated a strong reaction from peers outside your institution?

Will not be influenced by reactions to guidelines.

### Involvement in Organizations With Relevant Policies, Positions, or Guidelines

8. Are you involved as an employee, volunteer, or member of any organization that has published or to your knowledge is currently developing policies, positions, or guidelines relevant to these ASH guidelines, e.g., clinical practice guidelines, appropriate use criteria, expert consensus statement, mission statement, advocacy statement, amicus brief, or legislature or legal testimony?

No

Yes, as described below:

Column 1 Name the organization.

Column 2 Describe or reference the relevant policy, position, or guidelines.

Column 3 Describe your role with the organization, including your involvement in developing, disseminating, or implementing the relevant policy, position, or guidelines.

Add rows as needed for each organization.

| <i>Organization</i> | <i>Relevant Policy Position</i> | <i>Your Role</i> |
|---------------------|---------------------------------|------------------|
|                     |                                 |                  |

### Clinical Practice

9. Do you see patients clinically?

No

Yes

If yes, what is your primary specialty or subspecialty?

If yes, do you prescribe or otherwise recommend clinical interventions (e.g., screening or diagnostic tests, evaluations, treatments, procedures) that may be addressed by these guidelines?

No



Yes

If yes, please explain:

#### Other

10. Do you have other nonfinancial interests or relationships not described above that could be relevant to the work of developing these guidelines?

No

Yes

If yes, please describe:

#### Expected Interests

11. Do you expect to enter into, within the next 24 months, any new **financial or nonfinancial interests** not described above that could be relevant to the work of developing these guidelines?

No

Yes

If yes, please describe:

## Section 2. Attestation of Compliance With Conflict of Interest Policies

In consideration of my participation on these guidelines, I hereby certify and agree that:

| <i>Policy</i>                                                                                                                                                                                                                                                                                                                                                                                                                                                                                                                                                                                                                                                                                                                                                                                                                                                                                                                                                                                                                                                                                                                                                                                                             | <i>Initials</i> |
|---------------------------------------------------------------------------------------------------------------------------------------------------------------------------------------------------------------------------------------------------------------------------------------------------------------------------------------------------------------------------------------------------------------------------------------------------------------------------------------------------------------------------------------------------------------------------------------------------------------------------------------------------------------------------------------------------------------------------------------------------------------------------------------------------------------------------------------------------------------------------------------------------------------------------------------------------------------------------------------------------------------------------------------------------------------------------------------------------------------------------------------------------------------------------------------------------------------------------|-----------------|
| I have reviewed and understand the ASH Principles and Policies on Conflict of Interest published on the ASH website at <a href="https://www.hematology.org/about/governance/conflict-of-interest">https://www.hematology.org/about/governance/conflict-of-interest</a> including the special Policy on Management of Conflicts in the Development of Clinical Practice Guidelines (“ASH Policy”).                                                                                                                                                                                                                                                                                                                                                                                                                                                                                                                                                                                                                                                                                                                                                                                                                         | AJD             |
| I have disclosed and will continue to disclose completely all potential conflicts of interest for myself and for my partner or spouse, to the best of my ability and knowledge, in accordance with ASH Policy and this Disclosure Form.                                                                                                                                                                                                                                                                                                                                                                                                                                                                                                                                                                                                                                                                                                                                                                                                                                                                                                                                                                                   | AJD             |
| To ensure completeness and avoid discrepancies, I have checked and periodically will check my financial disclosures against other published information, including from the U.S. Centers for Medicare and Medicaid Services’ Open Payments database (or similar non-U.S. database) and explain any discrepant information.                                                                                                                                                                                                                                                                                                                                                                                                                                                                                                                                                                                                                                                                                                                                                                                                                                                                                                | AJD             |
| <p>Until submission of the guidelines for publication, I understand and agree that without special exception from ASH, any of the following will disqualify me from continued participation and I will not enter into:</p> <ul style="list-style-type: none"> <li>• Any <b>direct financial interest</b> of myself or my partner or spouse in any <b>for-profit healthcare company or companies</b>, if such interests in aggregate may be reasonably valued to be &gt;\$5,000/year, regardless of relevance to the guidelines</li> <li>• Any noneducational speaking by myself on behalf of any <b>for-profit healthcare company</b> (e.g., service on a company “speakers bureau”), regardless of relevance to the guidelines</li> <li>• Consulting or advising about the marketing of products by any <b>for-profit healthcare company</b> (e.g., service on a company “advisory board”), regardless of relevance to the guidelines</li> <li>• Simultaneous participation on guidelines by another organization on the same topic</li> <li>• Any <i>undisclosed</i> financial interest in any <b>for-profit healthcare company</b> occurring in the 24 months prior to my participation on these guidelines</li> </ul> | AJD             |
| I understand that if a disqualifying interest is reported, the usual course of action will be dismissal from participation and acknowledgment within the guideline publication rather than authorship.                                                                                                                                                                                                                                                                                                                                                                                                                                                                                                                                                                                                                                                                                                                                                                                                                                                                                                                                                                                                                    | AJD             |
| At regular intervals during the guideline development process, as determined by ASH, I will review my information in this Disclosure Form; provide updated disclosures; and, if requested, attest that I do not have any interests that should disqualify my participation.                                                                                                                                                                                                                                                                                                                                                                                                                                                                                                                                                                                                                                                                                                                                                                                                                                                                                                                                               | AJD             |

|                                                                                                                                                                                                                             |     |
|-----------------------------------------------------------------------------------------------------------------------------------------------------------------------------------------------------------------------------|-----|
| I agree to publish with the guidelines my complete disclosures, this agreement, and future attestations.                                                                                                                    | AJD |
| I understand that for 1 year following initial publication of the guidelines, I am encouraged by ASH to avoid new conflicts of interest that could reduce trust in the guidelines, in accordance with my own best judgment. | AJD |

Agreed by

Andrea Darzi

Date

June 30, 2020

### Section 3. ASH Review Prior to Participation

For ASH Internal Use Only

| <i>Name, Role</i>                                                      | <i>Date</i>   | <i>Management Notes</i> |
|------------------------------------------------------------------------|---------------|-------------------------|
| Eddrika Russell, ASH staff                                             | July 15, 2020 |                         |
| Menaka Pai, MD, Ex Officio, ASH<br>Guideline Oversight<br>Subcommittee | July 15, 2020 | Participation approved  |

## Section 4. Disclosures and Attestations During Participation

For ASH Internal Use Only

| <i>Disclosure or attestation</i> | <i>Date</i>      | <i>Reviewed by</i>     | <i>Management Notes</i>                                                                                                                            |
|----------------------------------|------------------|------------------------|----------------------------------------------------------------------------------------------------------------------------------------------------|
| Disclosure                       | June 29, 2021    | Russell                | Dr. Darzi agreed to adhere to the policies described herein. No special management considerations are required, including requirement for recusal. |
| Disclosure                       | October 1, 2021  | Russell                | Dr. Darzi agreed to adhere to the policies described herein.                                                                                       |
| Disclosure                       | January 18, 2022 | Deion Smith, ASH Staff | Dr. Darzi agreed to adhere to the policies described herein.                                                                                       |
|                                  | April 4, 2022    | Smith                  | Dr. Darzi confirmed that all information in the form is correct.                                                                                   |



ASH Clinical Practice Guidelines  
Participant Information

---

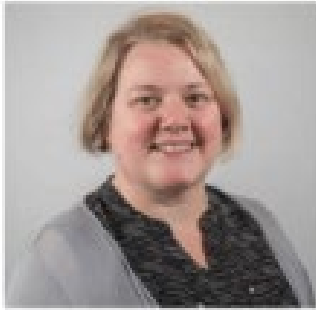

Karin Dearness, BSc, MLS

Director, Library Services

St. Joseph's Healthcare Hamilton

Hamilton, Ontario, Canada

---

### Project

ASH Clinical Practice Guidelines on Anticoagulation in Patients with COVID-19

### Role

Review Team Member

### Profile

Ms. Karin Dearness has more than thirty years of experience in health library and information services. She has supported the development of health evidence synthesis products ranging from knowledge guides and websites to systematic reviews and guidelines. Ms. Dearness has a passion for information retrieval, in particular systematic literature searching,

[July 22, 2020 profile approved by Ms. Dearness]

# 1. Disclosures Prior to Participation

## Definitions

- Conflict of interest** A situation in which a reasonable person would consider that an individual’s judgments or actions regarding any aspect of the guideline development process is, or could be perceived to be, influenced by an outside interest
- Financial interest** A position or relationship held by an individual that offers potential gain or loss of monetary value, such as employment, stock ownership, payment for services, or gifts given with the expectation of reciprocity
- Direct financial interest** A financial interest that is owned by the individual or received directly by the individual
- Indirect financial interest** A financial interest that is owned or received via an intermediary, e.g., research funding to an individual received through the individual’s academic institution
- For-profit healthcare company** “A for-profit entity that develops, produces, markets, or distributes drugs, devices, services, or therapies used to diagnose, treat, monitor, manage, and alleviate health conditions. This definition is not intended to include non-profit entities, entities outside of the healthcare sector, or entities through which physicians provide clinical services directly to patients” (Council of Medical Specialty Societies’ “Code for Interactions With Industry” 2015). This definition is furthermore not viewed by ASH to include companies that provide accredited continuing medical education or that publish scientific or educational content.

## Part A. Direct Financial Interests

### Employment With For-Profit Healthcare Companies

1. Are you currently or in the past 24 months have you been an employee of any **for-profit healthcare company**?

No

Yes, as described below:

Add rows as needed for each employment relationship.

| <i>Company</i> | <i>Description</i> | <i>End Date</i> | <i>For ASH Internal Use</i> |
|----------------|--------------------|-----------------|-----------------------------|
|                |                    |                 |                             |

### Equity in For-Profit Healthcare Companies

2. Do you currently or in the past 24 months have you had equity in any **for-profit healthcare company**? Equity includes stock, stock options, and other ownership interests but excludes diversified mutual fund shares.

No

Yes, as described below:

Add rows as needed for each equity interest.

| <i>Company</i> | <i>Description</i> | <i>Date Divested</i> | <i>For ASH Internal Use</i> |
|----------------|--------------------|----------------------|-----------------------------|
|                |                    |                      |                             |

### Healthcare-Related Patents, Royalties, and Other Intellectual Property

3. Do you currently or in the past 24 months have you owned patents for or received royalties from any intellectual property or product used to diagnose, treat, monitor, manage, or alleviate health conditions?

No

Yes, as described below:

Add rows as needed for each patent or royalty interest.

| <i>Company</i> | <i>Description</i> | <i>Date Divested</i> | <i>For ASH Internal Use</i> |
|----------------|--------------------|----------------------|-----------------------------|
|                |                    |                      |                             |

### Personal Income or Other Direct Transfers of Value From For-Profit Healthcare Companies

4. Do you currently or in the past 24 months have you received any personal income or other direct transfers of value (e.g., honoraria, gifts, travel support, meeting registration, meals) from any **for-profit healthcare company**?

No

Yes, as described below:

Column 1 Name the company.

Column 2 Describe the activity for which you received the income or other transfer of value, e.g., research, consultancy, speakers bureau involvement, service on an advisory committee or board, expert testimony.

Column 3 Indicate when the activity ended, if applicable. (If the activity has not yet ended, indicate "current" or "ongoing.")



Add rows as needed for each activity.

| <i>Company</i> | <i>Description</i> | <i>End Date</i> | <i>For ASH Internal Use</i> |
|----------------|--------------------|-----------------|-----------------------------|
|                |                    |                 |                             |

#### My Partner's or Spouse's Interests

5. Currently or in the past 24 months has *your partner or spouse* had any of the interests or relationships described in questions 1-4?

No

Yes, as described below:

Add rows as needed for each interest.

| <i>Company</i> | <i>Description</i> | <i>End Date</i> | <i>For ASH Internal Use</i> |
|----------------|--------------------|-----------------|-----------------------------|
|                |                    |                 |                             |

#### Other Relevant Direct Financial Interests

6. Do you have other current or recent (within the past 24 months) **direct financial interests** with any institution, organization, entity or individual that could be relevant to the work of developing these guidelines?

No

Yes

If yes, please explain:

## Part B. Indirect Financial Interests

### Institutional Research Funded by For-Profit Healthcare Companies

1. Through your institution, do you currently or in the past 24 months have you been involved in research funded or supported (e.g., in kind support, such as provision of a study drug) by any **for-profit healthcare company**?

No

Yes, as described below:

Column 1 Name the company funding or supporting the research.

Column 2 Briefly describe the research project.

Column 3 Describe your role: (a) national or overall principal investigator, (b) member of a steering committee of a study that does not have a principal investigator, (c) site or local investigator. If other than these options, please describe.

Column 4 Indicate when your involvement ended, if applicable. (If your involvement has not yet ended, indicate “current” or “ongoing.”)

Add rows as needed for each research project.

| <i>Company</i> | <i>Description of Research</i> | <i>My Role</i> | <i>End Date</i> | <i>For ASH Internal Use</i> |
|----------------|--------------------------------|----------------|-----------------|-----------------------------|
|                |                                |                |                 |                             |

### Paid and Volunteer Activities for Organizations Supported by For-Profit Healthcare Companies

2. Do you currently or in the past 24 months have you been involved in any volunteer or paid work for an organization that is wholly or partially funded by any **for-profit healthcare company**?

No

Yes, as described below:

Column 1 Name the organization. If known to you, describe any industry funding or support.

Column 2 Briefly describe your activity and role, e.g., employment, service on board of directors, other volunteer services.

Column 3 Indicate if your activity was paid or volunteered.

Column 4 Indicate when your involvement with the organization ended. (If your involvement has not yet ended, indicate “current” or “ongoing.”)

Add rows as needed for each organization.

| <i>Organization</i> | <i>Description and role</i> | <i>Paid or Unpaid?</i> | <i>End Date</i> | <i>For ASH Internal Use</i> |
|---------------------|-----------------------------|------------------------|-----------------|-----------------------------|
|                     |                             |                        |                 |                             |

Other Relevant Indirect Financial Interests

3. Do you have other **indirect financial interests** with any: (i) **for-profit healthcare** company; or (ii) other institution, organization, entity or individual that could be relevant to the work of developing these guidelines?

No

Yes

If yes, please explain:

## Part C. Relevant Other Interests That Are Not Mainly Financial

### Personal Beliefs

1. Do you have strongly held beliefs related to the topic of these guidelines?

No

Yes

If yes, please explain:

### Previously Published Opinions

2. Have you ever authored, coauthored, or publicly provided an opinion related to the topic of these guidelines, e.g., a clinical practice guideline, textbook, review article, meeting poster or presentation, grand rounds talk, letter to the editor?

No

Yes

If yes, what were those views and where were they made?

### Non-Industry Supported Research

3. Currently or in the past 24 months, have you been involved in a leadership role in any research project not already reported under Part B, Question 1, relevant to the topic of these guidelines, e.g., a research project funded by a nonprofit or governmental organization?

No

Yes, as described below:

Column 1 Name the entity funding the research.

Column 2 Describe the research project.

Column 3 Describe your role: (a) national or overall principal investigator, (b) member of a steering committee of a study that does not have a principal investigator, (c) site or local investigator. If other than these options, please describe.

Column 4 Indicate when your involvement ended, if applicable. (If your involvement has not yet ended, indicate "current" or "ongoing.")

Add rows as needed for each research project.

| <i>Funder</i>                      | <i>Description of Research</i>                                                                                            | <i>My Role</i>       | <i>End Date</i> |
|------------------------------------|---------------------------------------------------------------------------------------------------------------------------|----------------------|-----------------|
| Society for Critical Care Medicine | Systematic review of treatments for Covid-19 patients in critical care. The SCCM guidelines do not cover anticoagulation. | Literature searching | Ongoing         |

### Institutional Relationships

4. Could your compensation be affected by recommendations on this topic?

Don't know

No

Yes

If yes, please explain:

5. Do you generate revenues for your institution or employer by clinical activity, teaching, speaking, consulting, testifying, writing, or otherwise sharing your knowledge or opinions about this guideline topic?

Don't know

No

Yes

If yes, please explain: Searching work for systematic review/guideline is billed at hourly rate.

6. Could your institution benefit or be harmed by guidelines on this topic?

Don't know

No

Yes

If yes, please explain:

### Career Advancement

7. How would you characterize the support you would receive from your primary mentor, institution, or other entities if your work on this panel or authorship of these guidelines generated a strong reaction from peers outside your institution?

I would anticipate support from my direct supervisor and institution if the work generated strong reactions.

### Involvement in Organizations With Relevant Policies, Positions, or Guidelines

8. Are you involved as an employee, volunteer, or member of any organization that has published or to your knowledge is currently developing policies, positions, or guidelines relevant to these ASH guidelines, e.g., clinical practice guidelines, appropriate use criteria, expert consensus statement, mission statement, advocacy statement, amicus brief, or legislature or legal testimony?

No

Yes, as described below:

Column 1 Name the organization.

Column 2 Describe or reference the relevant policy, position, or guidelines.

Column 3 Describe your role with the organization, including your involvement in developing, disseminating, or implementing the relevant policy, position, or guidelines.

Add rows as needed for each organization.

| <i>Organization</i>                                                | <i>Relevant Policy Position</i>      | <i>Your Role</i>                                                                                     |
|--------------------------------------------------------------------|--------------------------------------|------------------------------------------------------------------------------------------------------|
| GUIDE group (McMaster University/St. Joseph's Healthcare Hamilton) | Produces guidelines on critical care | Supportive – conducting literature searches. Not involved in drafting guidelines or recommendations. |

### Clinical Practice

9. Do you see patients clinically?

No

Yes

If yes, what is your primary specialty or subspecialty?

If yes, do you prescribe or otherwise recommend clinical interventions (e.g., screening or diagnostic tests, evaluations, treatments, procedures) that may be addressed by these guidelines?

No

Yes

If yes, please explain:

#### Other

10. Do you have other nonfinancial interests or relationships not described above that could be relevant to the work of developing these guidelines?

No

Yes

If yes, please describe:

#### Expected Interests

11. Do you expect to enter into, within the next 24 months, any new **financial or nonfinancial interests** not described above that could be relevant to the work of developing these guidelines?

No

Yes

If yes, please describe:

## Section 2. Attestation of Compliance With Conflict of Interest Policies

In consideration of my participation on these guidelines, I hereby certify and agree that:

| <i>Policy</i>                                                                                                                                                                                                                                                                                                                                                                                                                                                                                                                                                                                                                                                                                                                                                                                                                                                                                                                                                                                                                                                                                                                                                                                                             | <i>Initials</i> |
|---------------------------------------------------------------------------------------------------------------------------------------------------------------------------------------------------------------------------------------------------------------------------------------------------------------------------------------------------------------------------------------------------------------------------------------------------------------------------------------------------------------------------------------------------------------------------------------------------------------------------------------------------------------------------------------------------------------------------------------------------------------------------------------------------------------------------------------------------------------------------------------------------------------------------------------------------------------------------------------------------------------------------------------------------------------------------------------------------------------------------------------------------------------------------------------------------------------------------|-----------------|
| I have reviewed and understand the ASH Principles and Policies on Conflict of Interest published on the ASH website at <a href="https://www.hematology.org/about/governance/conflict-of-interest">https://www.hematology.org/about/governance/conflict-of-interest</a> including the special Policy on Management of Conflicts in the Development of Clinical Practice Guidelines (“ASH Policy”).                                                                                                                                                                                                                                                                                                                                                                                                                                                                                                                                                                                                                                                                                                                                                                                                                         | KD              |
| I have disclosed and will continue to disclose completely all potential conflicts of interest for myself and for my partner or spouse, to the best of my ability and knowledge, in accordance with ASH Policy and this Disclosure Form.                                                                                                                                                                                                                                                                                                                                                                                                                                                                                                                                                                                                                                                                                                                                                                                                                                                                                                                                                                                   | KD              |
| To ensure completeness and avoid discrepancies, I have checked and periodically will check my financial disclosures against other published information, including from the U.S. Centers for Medicare and Medicaid Services’ Open Payments database (or similar non-U.S. database) and explain any discrepant information.                                                                                                                                                                                                                                                                                                                                                                                                                                                                                                                                                                                                                                                                                                                                                                                                                                                                                                | KD              |
| <p>Until submission of the guidelines for publication, I understand and agree that without special exception from ASH, any of the following will disqualify me from continued participation and I will not enter into:</p> <ul style="list-style-type: none"> <li>• Any <b>direct financial interest</b> of myself or my partner or spouse in any <b>for-profit healthcare company or companies</b>, if such interests in aggregate may be reasonably valued to be &gt;\$5,000/year, regardless of relevance to the guidelines</li> <li>• Any noneducational speaking by myself on behalf of any <b>for-profit healthcare company</b> (e.g., service on a company “speakers bureau”), regardless of relevance to the guidelines</li> <li>• Consulting or advising about the marketing of products by any <b>for-profit healthcare company</b> (e.g., service on a company “advisory board”), regardless of relevance to the guidelines</li> <li>• Simultaneous participation on guidelines by another organization on the same topic</li> <li>• Any <i>undisclosed</i> financial interest in any <b>for-profit healthcare company</b> occurring in the 24 months prior to my participation on these guidelines</li> </ul> | KD              |
| I understand that if a disqualifying interest is reported, the usual course of action will be dismissal from participation and acknowledgment within the guideline publication rather than authorship.                                                                                                                                                                                                                                                                                                                                                                                                                                                                                                                                                                                                                                                                                                                                                                                                                                                                                                                                                                                                                    | KD              |
| At regular intervals during the guideline development process, as determined by ASH, I will review my information in this Disclosure Form; provide updated disclosures; and, if requested, attest that I do not have any interests that should disqualify my participation.                                                                                                                                                                                                                                                                                                                                                                                                                                                                                                                                                                                                                                                                                                                                                                                                                                                                                                                                               | KD              |



| <i>Policy</i>                                                                                                                                                                                                               | <i>Initials</i> |
|-----------------------------------------------------------------------------------------------------------------------------------------------------------------------------------------------------------------------------|-----------------|
| I agree to publish with the guidelines my complete disclosures, this agreement, and future attestations.                                                                                                                    | KD              |
| I understand that for 1 year following initial publication of the guidelines, I am encouraged by ASH to avoid new conflicts of interest that could reduce trust in the guidelines, in accordance with my own best judgment. | KD              |

Agreed by

Karin Dearness

Date

09 July 2020

### Section 3. ASH Review Prior to Participation

For ASH Internal Use Only

| <i>Name, Role</i>                                                     | <i>Date</i>   | <i>Management Notes</i> |
|-----------------------------------------------------------------------|---------------|-------------------------|
| Eddrika Russell, ASH Staff                                            | July 16, 2020 |                         |
| Menaka Pai, MD, Ex Officio ASH<br>Guideline Oversight<br>Subcommittee | July 16, 2020 | Participation approved  |

## Section 4. Disclosures and Attestations During Participation

For ASH Internal Use Only

| <i>Disclosure or attestation</i> | <i>Date</i>      | <i>Reviewed by</i>     | <i>Management Notes</i>                                              |
|----------------------------------|------------------|------------------------|----------------------------------------------------------------------|
| Attestation                      | June 30, 2021    | Russell                | Ms. Dearness agreed to adhere to the policies described herein.      |
| Attestation                      | October 1, 2021  | Russell                | Ms. Dearness agreed to adhere to the policies described herein.      |
| Attestation                      | January 19, 2022 | Deion Smith, ASH Staff | Ms. Dearness agreed to adhere to the policies described herein.      |
|                                  | March 30, 2022   | Smith                  | Ms. Dearness confirmed that all information in this form is correct. |

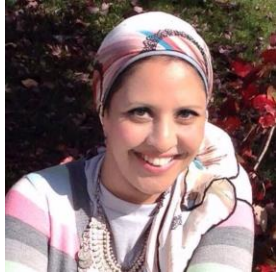

## Heba Hussein, BDS, MSc, PhD

Lecturer at Oral Medicine, Oral Diagnosis, and Periodontology Department,  
Faculty of Dentistry, Cairo University  
Cairo, Egypt

---

### Project

ASH Clinical Practice Guidelines on Anticoagulation in Patients with COVID-19

### Role

Review Team Member

### Profile

Dr. Hussein is a Cochrane author and translator and a member of Cochrane Oral Health. She has worked as a part of the research team of the eCOVID recmap project and is an Oral Medicine lecturer at Faculty of Dentistry, Cairo University. Initiated many student research groups being able to motivate, guide, and train undergraduates. She is currently, working as a research volunteer at the University of Illinois at Chicago (UIC). Her career goals involve utilizing the combined training in Oral Medicine, Molecular Biology, and Evidence-Based Dentistry in designing and executing studies aimed at diagnosis and management of oral lesions.

[May 14, 2021 profile approved by Dr. Hussein]

## Section 1. Disclosures Prior to Participation

### Definitions

|                                             |                                                                                                                                                                                                                                                                                                                                                                                                                                                                                                                                                                                                                                                             |
|---------------------------------------------|-------------------------------------------------------------------------------------------------------------------------------------------------------------------------------------------------------------------------------------------------------------------------------------------------------------------------------------------------------------------------------------------------------------------------------------------------------------------------------------------------------------------------------------------------------------------------------------------------------------------------------------------------------------|
| <b><i>Conflict of interest</i></b>          | A situation in which a reasonable person would consider that an individual’s judgments or actions regarding any aspect of the guideline development process is, or could be perceived to be, influenced by an outside interest                                                                                                                                                                                                                                                                                                                                                                                                                              |
| <b><i>Financial interest</i></b>            | A position or relationship held by an individual that offers potential gain or loss of monetary value, such as employment, stock ownership, payment for services, or gifts given with the expectation of reciprocity                                                                                                                                                                                                                                                                                                                                                                                                                                        |
| <b><i>Direct financial interest</i></b>     | A financial interest that is owned by the individual or received directly by the individual                                                                                                                                                                                                                                                                                                                                                                                                                                                                                                                                                                 |
| <b><i>Indirect financial interest</i></b>   | A financial interest that is owned or received via an intermediary, e.g., research funding to an individual received through the individual’s academic institution                                                                                                                                                                                                                                                                                                                                                                                                                                                                                          |
| <b><i>For-profit healthcare company</i></b> | “A for-profit entity that develops, produces, markets, or distributes drugs, devices, services, or therapies used to diagnose, treat, monitor, manage, and alleviate health conditions. This definition is not intended to include non-profit entities, entities outside of the healthcare sector, or entities through which physicians provide clinical services directly to patients” (Council of Medical Specialty Societies’ “Code for Interactions With Industry” 2015). This definition is furthermore not viewed by ASH to include companies that provide accredited continuing medical education or that publish scientific or educational content. |

### Part A. Direct Financial Interests

#### Employment With For-Profit Healthcare Companies

1. Are you currently or in the past 24 months have you been an employee of any **for-profit healthcare company**?

No

Yes, as described below:

Add rows as needed for each employment relationship.

| <i>Company</i> | <i>Description</i> | <i>End Date</i> | <i>For ASH Internal Use</i> |
|----------------|--------------------|-----------------|-----------------------------|
|                |                    |                 |                             |

### Equity in For-Profit Healthcare Companies

2. Do you currently or in the past 24 months have you had equity in any **for-profit healthcare company**? Equity includes stock, stock options, and other ownership interests but excludes diversified mutual fund shares.

No

Yes, as described below:

Add rows as needed for each equity interest.

| <i>Company</i> | <i>Description</i> | <i>Date Divested</i> | <i>For ASH Internal Use</i> |
|----------------|--------------------|----------------------|-----------------------------|
|                |                    |                      |                             |

### Healthcare-Related Patents, Royalties, and Other Intellectual Property

3. Do you currently or in the past 24 months have you owned patents for or received royalties from any intellectual property or product used to diagnose, treat, monitor, manage, or alleviate health conditions?

No

Yes, as described below:

Add rows as needed for each patent or royalty interest.

| <i>Company</i> | <i>Description</i> | <i>Date Divested</i> | <i>For ASH Internal Use</i> |
|----------------|--------------------|----------------------|-----------------------------|
|                |                    |                      |                             |

### Personal Income or Other Direct Transfers of Value From For-Profit Healthcare Companies

4. Do you currently or in the past 24 months have you received any personal income or other direct transfers of value (e.g., honoraria, gifts, travel support, meeting registration, meals) from any **for-profit healthcare company**?

No

Yes, as described below:

Column 1 Name the company.

Column 2 Describe the activity for which you received the income or other transfer of value, e.g., research, consultancy, speakers bureau involvement, service on an advisory committee or board, expert testimony.

Column 3 Indicate when the activity ended, if applicable. (If the activity has not yet ended, indicate "current" or "ongoing.")

Add rows as needed for each activity.

| <i>Company</i> | <i>Description</i> | <i>End Date</i> | <i>For ASH Internal Use</i> |
|----------------|--------------------|-----------------|-----------------------------|
|                |                    |                 |                             |

#### My Partner's or Spouse's Interests

5. Currently or in the past 24 months has *your partner or spouse* had any of the interests or relationships described in questions 1-4?

No

Yes, as described below:

Add rows as needed for each interest.

| <i>Company</i> | <i>Description</i> | <i>End Date</i> | <i>For ASH Internal Use</i> |
|----------------|--------------------|-----------------|-----------------------------|
|                |                    |                 |                             |

#### Other Relevant Direct Financial Interests

6. Do you have other current or recent (within the past 24 months) **direct financial interests** with any institution, organization, entity or individual that could be relevant to the work of developing these guidelines?

No

Yes

If yes, please explain:

## Part B. Indirect Financial Interests

### Institutional Research Funded by For-Profit Healthcare Companies

1. Through your institution, do you currently or in the past 24 months have you been involved in research funded or supported (e.g., in kind support, such as provision of a study drug) by any **for-profit healthcare company**?

No

Yes, as described below:

Column 1 Name the company funding or supporting the research.

Column 2 Briefly describe the research project.

Column 3 Describe your role: (a) national or overall principal investigator, (b) member of a steering committee of a study that does not have a principal investigator, (c) site or local investigator. If other than these options, please describe.

Column 4 Indicate when your involvement ended, if applicable. (If your involvement has not yet ended, indicate “current” or “ongoing.”)

Add rows as needed for each research project.

| <i>Company</i> | <i>Description of Research</i> | <i>My Role</i> | <i>End Date</i> | <i>For ASH Internal Use</i> |
|----------------|--------------------------------|----------------|-----------------|-----------------------------|
|                |                                |                |                 |                             |

### Paid and Volunteer Activities for Organizations Supported by For-Profit Healthcare Companies

2. Do you currently or in the past 24 months have you been involved in any volunteer or paid work for an organization that is wholly or partially funded by any **for-profit healthcare company**?

No

Yes, as described below:

Column 1 Name the organization. If known to you, describe any industry funding or support.

Column 2 Briefly describe your activity and role, e.g., employment, service on board of directors, other volunteer services.

Column 3 Indicate if your activity was paid or volunteered.

Column 4 Indicate when your involvement with the organization ended. (If your involvement has not yet ended, indicate “current” or “ongoing.”)

Add rows as needed for each organization.



| <i>Organization</i> | <i>Description and role</i> | <i>Paid or Unpaid?</i> | <i>End Date</i> | <i>For ASH Internal Use</i> |
|---------------------|-----------------------------|------------------------|-----------------|-----------------------------|
|                     |                             |                        |                 |                             |

Other Relevant Indirect Financial Interests

3. Do you have other **indirect financial interests** with any: (i) **for-profit healthcare** company; or (ii) other institution, organization, entity or individual that could be relevant to the work of developing these guidelines?

No

Yes

If yes, please explain:

## Part C. Relevant Other Interests That Are Not Mainly Financial

### Personal Beliefs

1. Do you have strongly held beliefs related to the topic of these guidelines?

No

Yes

If yes, please explain:

### Previously Published Opinions

2. Have you ever authored, coauthored, or publicly provided an opinion related to the topic of these guidelines, e.g., a clinical practice guideline, textbook, review article, meeting poster or presentation, grand rounds talk, letter to the editor?

No

Yes

If yes, what were those views and where were they made?

### Non-Industry Supported Research

3. Currently or in the past 24 months, have you been involved in a leadership role in any research project not already reported under Part B, Question 1, relevant to the topic of these guidelines, e.g., a research project funded by a nonprofit or governmental organization?

No

Yes, as described below:

Column 1 Name the entity funding the research.

Column 2 Describe the research project.

Column 3 Describe your role: (a) national or overall principal investigator, (b) member of a steering committee of a study that does not have a principal investigator, (c) site or local investigator. If other than these options, please describe.

Column 4 Indicate when your involvement ended, if applicable. (If your involvement has not yet ended, indicate "current" or "ongoing.")

Add rows as needed for each research project.

| <i>Funder</i> | <i>Description of Research</i> | <i>My Role</i> | <i>End Date</i> |
|---------------|--------------------------------|----------------|-----------------|
|               |                                |                |                 |

### Institutional Relationships

4. Could your compensation be affected by recommendations on this topic?

Don't know

No

Yes

If yes, please explain:

5. Do you generate revenues for your institution or employer by clinical activity, teaching, speaking, consulting, testifying, writing, or otherwise sharing your knowledge or opinions about this guideline topic?

Don't know

No

Yes

If yes, please explain:

6. Could your institution benefit or be harmed by guidelines on this topic?

Don't know

No

Yes

If yes, please explain:

### Career Advancement

7. How would you characterize the support you would receive from your primary mentor, institution, or other entities if your work on this panel or authorship of these guidelines generated a strong reaction from peers outside your institution? It will increase my guidelines participation opportunities.

### Involvement in Organizations With Relevant Policies, Positions, or Guidelines

8. Are you involved as an employee, volunteer, or member of any organization that has published or to your knowledge is currently developing policies, positions, or guidelines relevant to these ASH

guidelines, e.g., clinical practice guidelines, appropriate use criteria, expert consensus statement, mission statement, advocacy statement, amicus brief, or legislature or legal testimony?

No

Yes, as described below:

Column 1 Name the organization.

Column 2 Describe or reference the relevant policy, position, or guidelines.

Column 3 Describe your role with the organization, including your involvement in developing, disseminating, or implementing the relevant policy, position, or guidelines.

Add rows as needed for each organization.

| <i>Organization</i> | <i>Relevant Policy Position</i> | <i>Your Role</i> |
|---------------------|---------------------------------|------------------|
|                     |                                 |                  |

#### Clinical Practice

9. Do you see patients clinically?

No

Yes

If yes, what is your primary specialty or subspecialty?

Dentist

If yes, do you prescribe or otherwise recommend clinical interventions (e.g., screening or diagnostic tests, evaluations, treatments, procedures) that may be addressed by these guidelines?

No

Yes

If yes, please explain:

#### Other

10. Do you have other nonfinancial interests or relationships not described above that could be relevant to the work of developing these guidelines?

No

Yes

If yes, please describe:

#### Expected Interests

11. Do you expect to enter into, within the next 24 months, any new **financial or nonfinancial interests** not described above that could be relevant to the work of developing these guidelines?

No

Yes

If yes, please describe:

## Section 2. Attestation of Compliance With Conflict of Interest Policies

In consideration of my participation on these guidelines, I hereby certify and agree that:

| <i>Policy</i>                                                                                                                                                                                                                                                                                                                                                                                                                                                                                                                                                                                                                                                                                                                                                                                                                                                                                                                                                                                                                                                                                                                                                                                                             | <i>Initials</i> |
|---------------------------------------------------------------------------------------------------------------------------------------------------------------------------------------------------------------------------------------------------------------------------------------------------------------------------------------------------------------------------------------------------------------------------------------------------------------------------------------------------------------------------------------------------------------------------------------------------------------------------------------------------------------------------------------------------------------------------------------------------------------------------------------------------------------------------------------------------------------------------------------------------------------------------------------------------------------------------------------------------------------------------------------------------------------------------------------------------------------------------------------------------------------------------------------------------------------------------|-----------------|
| I have reviewed and understand the ASH Principles and Policies on Conflict of Interest published on the ASH website at <a href="https://www.hematology.org/about/governance/conflict-of-interest">https://www.hematology.org/about/governance/conflict-of-interest</a> including the special Policy on Management of Conflicts in the Development of Clinical Practice Guidelines (“ASH Policy”).                                                                                                                                                                                                                                                                                                                                                                                                                                                                                                                                                                                                                                                                                                                                                                                                                         | HH              |
| I have disclosed and will continue to disclose completely all potential conflicts of interest for myself and for my partner or spouse, to the best of my ability and knowledge, in accordance with ASH Policy and this Disclosure Form.                                                                                                                                                                                                                                                                                                                                                                                                                                                                                                                                                                                                                                                                                                                                                                                                                                                                                                                                                                                   | HH              |
| To ensure completeness and avoid discrepancies, I have checked and periodically will check my financial disclosures against other published information, including from the U.S. Centers for Medicare and Medicaid Services’ Open Payments database (or similar non-U.S. database) and explain any discrepant information.                                                                                                                                                                                                                                                                                                                                                                                                                                                                                                                                                                                                                                                                                                                                                                                                                                                                                                | HH              |
| <p>Until submission of the guidelines for publication, I understand and agree that without special exception from ASH, any of the following will disqualify me from continued participation and I will not enter into:</p> <ul style="list-style-type: none"> <li>• Any <b>direct financial interest</b> of myself or my partner or spouse in any <b>for-profit healthcare company or companies</b>, if such interests in aggregate may be reasonably valued to be &gt;\$5,000/year, regardless of relevance to the guidelines</li> <li>• Any noneducational speaking by myself on behalf of any <b>for-profit healthcare company</b> (e.g., service on a company “speakers bureau”), regardless of relevance to the guidelines</li> <li>• Consulting or advising about the marketing of products by any <b>for-profit healthcare company</b> (e.g., service on a company “advisory board”), regardless of relevance to the guidelines</li> <li>• Simultaneous participation on guidelines by another organization on the same topic</li> <li>• Any <i>undisclosed</i> financial interest in any <b>for-profit healthcare company</b> occurring in the 24 months prior to my participation on these guidelines</li> </ul> | HH              |
| I understand that if a disqualifying interest is reported, the usual course of action will be dismissal from participation and acknowledgment within the guideline publication rather than authorship.                                                                                                                                                                                                                                                                                                                                                                                                                                                                                                                                                                                                                                                                                                                                                                                                                                                                                                                                                                                                                    | HH              |
| At regular intervals during the guideline development process, as determined by ASH, I will review my information in this Disclosure Form; provide updated disclosures; and, if requested, attest that I do not have any interests that should disqualify my participation.                                                                                                                                                                                                                                                                                                                                                                                                                                                                                                                                                                                                                                                                                                                                                                                                                                                                                                                                               | HH              |

|                                                                                                                                                                                                                             |    |
|-----------------------------------------------------------------------------------------------------------------------------------------------------------------------------------------------------------------------------|----|
| I agree to publish with the guidelines my complete disclosures, this agreement, and future attestations.                                                                                                                    | HH |
| I understand that for 1 year following initial publication of the guidelines, I am encouraged by ASH to avoid new conflicts of interest that could reduce trust in the guidelines, in accordance with my own best judgment. | HH |

Agreed by

Heba Hussein

Date

03/30/2021

### Section 3. ASH Review Prior to Participation

For ASH Internal Use Only

| <i>Name, Role</i>                                                       | <i>Date</i>    | <i>Management Notes</i> |
|-------------------------------------------------------------------------|----------------|-------------------------|
| Eddrika Russell, ASH staff                                              | April 19, 2021 |                         |
| Dee Terrell, PhD, Ex Officio ASH<br>Guideline Oversight<br>Subcommittee | April 19, 2021 | Participation approved  |



## Section 4. Disclosures and Attestations During Participation

For ASH Internal Use Only

| <i>Disclosure or attestation</i> | <i>Date</i>      | <i>Reviewed by</i>     | <i>Management Notes</i>                                              |
|----------------------------------|------------------|------------------------|----------------------------------------------------------------------|
| Attestation                      | June 29, 2021    | Russell                | Dr. Hussein agreed to adhere to the policies described herein.       |
| Attestation                      | October 2, 2021  | Russell                | Dr. Hussein agreed to adhere to the policies described herein.       |
| Attestation                      | January 18, 2022 | Deion Smith, ASH Staff | Dr. Hussein agreed to adhere to the policies described herein.       |
|                                  | March 30, 2020   | Smith                  | Dr. Hussein confirmed that all information in this form was correct. |

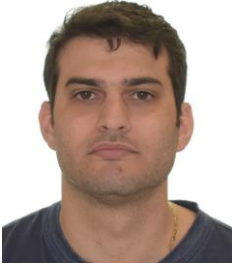

Samer G. Karam, MD, MSc

General Surgeon

McMaster University

Hamilton, Ontario, Canada

---

### Project

ASH Clinical Practice Guidelines on Anticoagulation in Patients with COVID-19

### Role

Review Team Member

### Profile

Dr. Samer Karam is a General Surgeon and who recently completed a trauma fellowship at the General Hamilton Hospital and is currently completing a PhD in Health Research Methods. He is a project coordinator and has completed his Master's degree at the Department of Health Research Methods, Evidence, and Impact at McMaster University. He is also a member of the GRADE working group. Dr. Karam has coordinated and contributed multiple systematic review efforts and was part of the American Society of Hematology guideline effort on management of VTE in thrombophilia. The scope of his current work is related to appraising risk of bias and indirectness in values and preferences studies.

[July 17, 2020 profile approved by Dr. Karam. Updated by Dr. Karam on April 4<sup>th</sup> 2022.]

# 1. Disclosures Prior to Participation

## Definitions

- Conflict of interest** A situation in which a reasonable person would consider that an individual’s judgments or actions regarding any aspect of the guideline development process is, or could be perceived to be, influenced by an outside interest
- Financial interest** A position or relationship held by an individual that offers potential gain or loss of monetary value, such as employment, stock ownership, payment for services, or gifts given with the expectation of reciprocity
- Direct financial interest** A financial interest that is owned by the individual or received directly by the individual
- Indirect financial interest** A financial interest that is owned or received via an intermediary, e.g., research funding to an individual received through the individual’s academic institution
- For-profit healthcare company** “A for-profit entity that develops, produces, markets, or distributes drugs, devices, services, or therapies used to diagnose, treat, monitor, manage, and alleviate health conditions. This definition is not intended to include non-profit entities, entities outside of the healthcare sector, or entities through which physicians provide clinical services directly to patients” (Council of Medical Specialty Societies’ “Code for Interactions With Industry” 2015). This definition is furthermore not viewed by ASH to include companies that provide accredited continuing medical education or that publish scientific or educational content.

## Part A. Direct Financial Interests

### Employment With For-Profit Healthcare Companies

1. Are you currently or in the past 24 months have you been an employee of any **for-profit healthcare company**?

No

Yes, as described below:

Add rows as needed for each employment relationship.

| <i>Company</i> | <i>Description</i> | <i>End Date</i> | <i>For ASH Internal Use</i> |
|----------------|--------------------|-----------------|-----------------------------|
|                |                    |                 |                             |

### Equity in For-Profit Healthcare Companies

2. Do you currently or in the past 24 months have you had equity in any **for-profit healthcare company**? Equity includes stock, stock options, and other ownership interests but excludes diversified mutual fund shares.

No

Yes, as described below:

Add rows as needed for each equity interest.

| <i>Company</i> | <i>Description</i> | <i>Date Divested</i> | <i>For ASH Internal Use</i> |
|----------------|--------------------|----------------------|-----------------------------|
|                |                    |                      |                             |

### Healthcare-Related Patents, Royalties, and Other Intellectual Property

3. Do you currently or in the past 24 months have you owned patents for or received royalties from any intellectual property or product used to diagnose, treat, monitor, manage, or alleviate health conditions?

No

Yes, as described below:

Add rows as needed for each patent or royalty interest.

| <i>Company</i> | <i>Description</i> | <i>Date Divested</i> | <i>For ASH Internal Use</i> |
|----------------|--------------------|----------------------|-----------------------------|
|                |                    |                      |                             |

### Personal Income or Other Direct Transfers of Value From For-Profit Healthcare Companies

4. Do you currently or in the past 24 months have you received any personal income or other direct transfers of value (e.g., honoraria, gifts, travel support, meeting registration, meals) from any **for-profit healthcare company**?

No

Yes, as described below:

Column 1 Name the company.

Column 2 Describe the activity for which you received the income or other transfer of value, e.g., research, consultancy, speakers bureau involvement, service on an advisory committee or board, expert testimony.

Column 3 Indicate when the activity ended, if applicable. (If the activity has not yet ended, indicate "current" or "ongoing.")

Add rows as needed for each activity.

| <i>Company</i> | <i>Description</i> | <i>End Date</i> | <i>For ASH Internal Use</i> |
|----------------|--------------------|-----------------|-----------------------------|
|                |                    |                 |                             |

My Partner's or Spouse's Interests

5. Currently or in the past 24 months has *your partner or spouse* had any of the interests or relationships described in questions 1-4?

No

Yes, as described below:

Add rows as needed for each interest.

| <i>Company</i> | <i>Description</i> | <i>End Date</i> | <i>For ASH Internal Use</i> |
|----------------|--------------------|-----------------|-----------------------------|
|                |                    |                 |                             |

Other Relevant Direct Financial Interests

6. Do you have other current or recent (within the past 24 months) **direct financial interests** with any institution, organization, entity or individual that could be relevant to the work of developing these guidelines?

No

Yes

If yes, please explain:

## Part B. Indirect Financial Interests

### Institutional Research Funded by For-Profit Healthcare Companies

1. Through your institution, do you currently or in the past 24 months have you been involved in research funded or supported (e.g., in kind support, such as provision of a study drug) by any **for-profit healthcare company**?

No

Yes, as described below:

Column 1 Name the company funding or supporting the research.

Column 2 Briefly describe the research project.

Column 3 Describe your role: (a) national or overall principal investigator, (b) member of a steering committee of a study that does not have a principal investigator, (c) site or local investigator. If other than these options, please describe.

Column 4 Indicate when your involvement ended, if applicable. (If your involvement has not yet ended, indicate “current” or “ongoing.”)

Add rows as needed for each research project.

| <i>Company</i> | <i>Description of Research</i> | <i>My Role</i> | <i>End Date</i> | <i>For ASH Internal Use</i> |
|----------------|--------------------------------|----------------|-----------------|-----------------------------|
|                |                                |                |                 |                             |

### Paid and Volunteer Activities for Organizations Supported by For-Profit Healthcare Companies

2. Do you currently or in the past 24 months have you been involved in any volunteer or paid work for an organization that is wholly or partially funded by any **for-profit healthcare company**?

No

Yes, as described below:

Column 1 Name the organization. If known to you, describe any industry funding or support.

Column 2 Briefly describe your activity and role, e.g., employment, service on board of directors, other volunteer services.

Column 3 Indicate if your activity was paid or volunteered.

Column 4 Indicate when your involvement with the organization ended. (If your involvement has not yet ended, indicate “current” or “ongoing.”)

Add rows as needed for each organization.

| <i>Organization</i> | <i>Description and role</i> | <i>Paid or Unpaid?</i> | <i>End Date</i> | <i>For ASH Internal Use</i> |
|---------------------|-----------------------------|------------------------|-----------------|-----------------------------|
|                     |                             |                        |                 |                             |

Other Relevant Indirect Financial Interests

3. Do you have other **indirect financial interests** with any: (i) **for-profit healthcare** company; or (ii) other institution, organization, entity or individual that could be relevant to the work of developing these guidelines?

No

Yes

If yes, please explain:

## Part C. Relevant Other Interests That Are Not Mainly Financial

### Personal Beliefs

1. Do you have strongly held beliefs related to the topic of these guidelines?

No

Yes

If yes, please explain:

### Previously Published Opinions

2. Have you ever authored, coauthored, or publicly provided an opinion related to the topic of these guidelines, e.g., a clinical practice guideline, textbook, review article, meeting poster or presentation, grand rounds talk, letter to the editor?

No

Yes

If yes, what were those views and where were they made?

### Non-Industry Supported Research

3. Currently or in the past 24 months, have you been involved in a leadership role in any research project not already reported under Part B, Question 1, relevant to the topic of these guidelines, e.g., a research project funded by a nonprofit or governmental organization?

No

Yes, as described below:

Column 1 Name the entity funding the research.

Column 2 Describe the research project.

Column 3 Describe your role: (a) national or overall principal investigator, (b) member of a steering committee of a study that does not have a principal investigator, (c) site or local investigator. If other than these options, please describe.

Column 4 Indicate when your involvement ended, if applicable. (If your involvement has not yet ended, indicate "current" or "ongoing.")

Add rows as needed for each research project.



| <i>Funder</i>     | <i>Description of Research</i>                                                                                   | <i>My Role</i> | <i>End Date</i>            |
|-------------------|------------------------------------------------------------------------------------------------------------------|----------------|----------------------------|
| CDC through Karna | Systematic review and meta-analysis of prognostic factors for VTE and bleeding in hospitalized medical patients. | Co-author      | Contract ended August 2018 |
| CDC through Karna | Risk models for VTE and bleeding in hospitalized medical patients using a novel approach.                        | Co-author      | Contract ended August 2018 |

### Institutional Relationships

4. Could your compensation be affected by recommendations on this topic?

Don't know

No

Yes

If yes, please explain:

5. Do you generate revenues for your institution or employer by clinical activity, teaching, speaking, consulting, testifying, writing, or otherwise sharing your knowledge or opinions about this guideline topic?

Don't know

No

Yes

If yes, please explain:

6. Could your institution benefit or be harmed by guidelines on this topic?

Don't know

No

Yes

If yes, please explain:

### Career Advancement

7. How would you characterize the support you would receive from your primary mentor, institution, or other entities if your work on this panel or authorship of these guidelines generated a strong reaction from peers outside your institution?

Will not be influenced by reactions to guidelines.

### Involvement in Organizations With Relevant Policies, Positions, or Guidelines

8. Are you involved as an employee, volunteer, or member of any organization that has published or to your knowledge is currently developing policies, positions, or guidelines relevant to these ASH guidelines, e.g., clinical practice guidelines, appropriate use criteria, expert consensus statement, mission statement, advocacy statement, amicus brief, or legislature or legal testimony?

No

Yes, as described below:

Column 1 Name the organization.

Column 2 Describe or reference the relevant policy, position, or guidelines.

Column 3 Describe your role with the organization, including your involvement in developing, disseminating, or implementing the relevant policy, position, or guidelines.

Add rows as needed for each organization.

| <i>Organization</i> | <i>Relevant Policy Position</i> | <i>Your Role</i> |
|---------------------|---------------------------------|------------------|
|                     |                                 |                  |

### Clinical Practice

9. Do you see patients clinically?

No

Yes

If yes, what is your primary specialty or subspecialty?

I am a general surgeon completing a trauma fellowship and see patients in that capacity.

If yes, do you prescribe or otherwise recommend clinical interventions (e.g., screening or diagnostic tests, evaluations, treatments, procedures) that may be addressed by these guidelines?

No

Yes

If yes, please explain:

#### Other

10. Do you have other nonfinancial interests or relationships not described above that could be relevant to the work of developing these guidelines?

No

Yes

If yes, please describe:

#### Expected Interests

11. Do you expect to enter into, within the next 24 months, any new **financial or nonfinancial interests** not described above that could be relevant to the work of developing these guidelines?

No

Yes

If yes, please describe:

## Section 2. Attestation of Compliance With Conflict of Interest Policies

In consideration of my participation on these guidelines, I hereby certify and agree that:

| <i>Policy</i>                                                                                                                                                                                                                                                                                                                                                                                                                                                                                                                                                                                                                                                                                                                                                                                                                                                                                                                                                                                                                                                                                                                                                                                                             | <i>Initials</i> |
|---------------------------------------------------------------------------------------------------------------------------------------------------------------------------------------------------------------------------------------------------------------------------------------------------------------------------------------------------------------------------------------------------------------------------------------------------------------------------------------------------------------------------------------------------------------------------------------------------------------------------------------------------------------------------------------------------------------------------------------------------------------------------------------------------------------------------------------------------------------------------------------------------------------------------------------------------------------------------------------------------------------------------------------------------------------------------------------------------------------------------------------------------------------------------------------------------------------------------|-----------------|
| I have reviewed and understand the ASH Principles and Policies on Conflict of Interest published on the ASH website at <a href="https://www.hematology.org/about/governance/conflict-of-interest">https://www.hematology.org/about/governance/conflict-of-interest</a> including the special Policy on Management of Conflicts in the Development of Clinical Practice Guidelines (“ASH Policy”).                                                                                                                                                                                                                                                                                                                                                                                                                                                                                                                                                                                                                                                                                                                                                                                                                         | SGK             |
| I have disclosed and will continue to disclose completely all potential conflicts of interest for myself and for my partner or spouse, to the best of my ability and knowledge, in accordance with ASH Policy and this Disclosure Form.                                                                                                                                                                                                                                                                                                                                                                                                                                                                                                                                                                                                                                                                                                                                                                                                                                                                                                                                                                                   | SGK             |
| To ensure completeness and avoid discrepancies, I have checked and periodically will check my financial disclosures against other published information, including from the U.S. Centers for Medicare and Medicaid Services’ Open Payments database (or similar non-U.S. database) and explain any discrepant information.                                                                                                                                                                                                                                                                                                                                                                                                                                                                                                                                                                                                                                                                                                                                                                                                                                                                                                | SGK             |
| <p>Until submission of the guidelines for publication, I understand and agree that without special exception from ASH, any of the following will disqualify me from continued participation and I will not enter into:</p> <ul style="list-style-type: none"> <li>• Any <b>direct financial interest</b> of myself or my partner or spouse in any <b>for-profit healthcare company or companies</b>, if such interests in aggregate may be reasonably valued to be &gt;\$5,000/year, regardless of relevance to the guidelines</li> <li>• Any noneducational speaking by myself on behalf of any <b>for-profit healthcare company</b> (e.g., service on a company “speakers bureau”), regardless of relevance to the guidelines</li> <li>• Consulting or advising about the marketing of products by any <b>for-profit healthcare company</b> (e.g., service on a company “advisory board”), regardless of relevance to the guidelines</li> <li>• Simultaneous participation on guidelines by another organization on the same topic</li> <li>• Any <i>undisclosed</i> financial interest in any <b>for-profit healthcare company</b> occurring in the 24 months prior to my participation on these guidelines</li> </ul> | SGK             |
| I understand that if a disqualifying interest is reported, the usual course of action will be dismissal from participation and acknowledgment within the guideline publication rather than authorship.                                                                                                                                                                                                                                                                                                                                                                                                                                                                                                                                                                                                                                                                                                                                                                                                                                                                                                                                                                                                                    | SGK             |
| At regular intervals during the guideline development process, as determined by ASH, I will review my information in this Disclosure Form; provide updated disclosures; and, if requested, attest that I do not have any interests that should disqualify my participation.                                                                                                                                                                                                                                                                                                                                                                                                                                                                                                                                                                                                                                                                                                                                                                                                                                                                                                                                               | SGK             |

|                                                                                                                                                                                                                             |     |
|-----------------------------------------------------------------------------------------------------------------------------------------------------------------------------------------------------------------------------|-----|
| I agree to publish with the guidelines my complete disclosures, this agreement, and future attestations.                                                                                                                    | SGK |
| I understand that for 1 year following initial publication of the guidelines, I am encouraged by ASH to avoid new conflicts of interest that could reduce trust in the guidelines, in accordance with my own best judgment. | SGK |

Agreed by [Samer G. Karam]

Date [30 June 2020]

### Section 3. ASH Review Prior to Participation

For ASH Internal Use Only

| <i>Name, Role</i>                                                     | <i>Date</i>   | <i>Management Notes</i> |
|-----------------------------------------------------------------------|---------------|-------------------------|
| Eddrika Russell, ASH staff                                            | July 16, 2020 |                         |
| Menaka Pai, MD, Ex Officio ASH<br>Guideline Oversight<br>Subcommittee | July 16, 2020 | Participation approved  |

## Section 4. Disclosures and Attestations During Participation

For ASH Internal Use Only

| <i>Disclosure or attestation</i> | <i>Date</i>      | <i>Reviewed by</i>     | <i>Management Notes</i>                                                                                   |
|----------------------------------|------------------|------------------------|-----------------------------------------------------------------------------------------------------------|
| Disclosure                       | July 21, 2021    | Russell                | Dr. Karam disclosed he is no longer seeing patients in any capacity in 2021 and at least until June 2022. |
| Attestation                      | July 26, 2021    | Russell                | Dr. Karam agreed to adhere to the policies described herein.                                              |
| Attestation                      | October 8, 2021  | Russell                | Dr. Karam agreed to adhere to the policies described herein.                                              |
| Attestation                      | January 18, 2022 | Deion Smith, ASH Staff | Dr. Karam agreed to adhere to the policies described herein.                                              |
|                                  | April 4, 2022    | Smith                  | Dr. Karam confirmed that all information in this form is correct.                                         |



ASH Clinical Practice Guidelines  
Participant Information

---

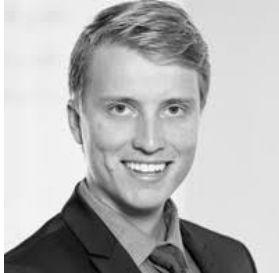

Philipp Kolb, MBA, BHSc

Medical Student

McMaster University

Hamilton, Ontario, Canada

---

### Project

ASH Clinical Practice Guidelines on Anticoagulation in Patients with COVID-19

### Role

Review Team Member

### Profile

Mr. Philipp Kolb is a MD Student at McMaster University with experience in both Basic Science and Clinical Research settings. Most of his research career was spent studying Pulmonary Fibrosis and other Respiratory Diseases. Recently, he switched interests to systematic reviews and guideline development. Prior to starting medical school, he completed a MBA and worked in Industry as an Analyst focused on the strategic use of big data and front-end data visualization.

[July 20, 2020 profile approved by Mr. Kolb]



## Section 1. Disclosures Prior to Participation

### Definitions

|                                      |                                                                                                                                                                                                                                                                                                                                                                                                                                                                                                                                                                                                                                                             |
|--------------------------------------|-------------------------------------------------------------------------------------------------------------------------------------------------------------------------------------------------------------------------------------------------------------------------------------------------------------------------------------------------------------------------------------------------------------------------------------------------------------------------------------------------------------------------------------------------------------------------------------------------------------------------------------------------------------|
| <b>Conflict of interest</b>          | A situation in which a reasonable person would consider that an individual’s judgments or actions regarding any aspect of the guideline development process is, or could be perceived to be, influenced by an outside interest                                                                                                                                                                                                                                                                                                                                                                                                                              |
| <b>Financial interest</b>            | A position or relationship held by an individual that offers potential gain or loss of monetary value, such as employment, stock ownership, payment for services, or gifts given with the expectation of reciprocity                                                                                                                                                                                                                                                                                                                                                                                                                                        |
| <b>Direct financial interest</b>     | A financial interest that is owned by the individual or received directly by the individual                                                                                                                                                                                                                                                                                                                                                                                                                                                                                                                                                                 |
| <b>Indirect financial interest</b>   | A financial interest that is owned or received via an intermediary, e.g., research funding to an individual received through the individual’s academic institution                                                                                                                                                                                                                                                                                                                                                                                                                                                                                          |
| <b>For-profit healthcare company</b> | “A for-profit entity that develops, produces, markets, or distributes drugs, devices, services, or therapies used to diagnose, treat, monitor, manage, and alleviate health conditions. This definition is not intended to include non-profit entities, entities outside of the healthcare sector, or entities through which physicians provide clinical services directly to patients” (Council of Medical Specialty Societies’ “Code for Interactions With Industry” 2015). This definition is furthermore not viewed by ASH to include companies that provide accredited continuing medical education or that publish scientific or educational content. |

### Part A. Direct Financial Interests

#### Employment With For-Profit Healthcare Companies

1. Are you currently or in the past 24 months have you been an employee of any **for-profit healthcare company**?

No

Yes, as described below:

Add rows as needed for each employment relationship.

| <i>Company</i> | <i>Description</i>         | <i>End Date</i> | <i>For ASH Internal Use</i> |
|----------------|----------------------------|-----------------|-----------------------------|
| AstraZeneca    | (Respiratory) Data Analyst | July 2019       |                             |

| <i>Company</i>       | <i>Description</i> | <i>End Date</i> | <i>For ASH Internal Use</i> |
|----------------------|--------------------|-----------------|-----------------------------|
| Boehringer Ingelheim | Marketing Intern   | August 2018     |                             |

#### Equity in For-Profit Healthcare Companies

2. Do you currently or in the past 24 months have you had equity in any **for-profit healthcare company**? Equity includes stock, stock options, and other ownership interests but excludes diversified mutual fund shares.

No

Yes, as described below:

Add rows as needed for each equity interest.

| <i>Company</i> | <i>Description</i> | <i>Date Divested</i> | <i>For ASH Internal Use</i> |
|----------------|--------------------|----------------------|-----------------------------|
|                |                    |                      |                             |

#### Healthcare-Related Patents, Royalties, and Other Intellectual Property

3. Do you currently or in the past 24 months have you owned patents for or received royalties from any intellectual property or product used to diagnose, treat, monitor, manage, or alleviate health conditions?

No

Yes, as described below:

Add rows as needed for each patent or royalty interest.

| <i>Company</i> | <i>Description</i> | <i>Date Divested</i> | <i>For ASH Internal Use</i> |
|----------------|--------------------|----------------------|-----------------------------|
|                |                    |                      |                             |

#### Personal Income or Other Direct Transfers of Value From For-Profit Healthcare Companies

4. Do you currently or in the past 24 months have you received any personal income or other direct transfers of value (e.g., honoraria, gifts, travel support, meeting registration, meals) from any **for-profit healthcare company**?

No

Yes, as described below:

Column 1 Name the company.

Column 2 Describe the activity for which you received the income or other transfer of value, e.g., research, consultancy, speakers bureau involvement, service on an advisory committee or board, expert testimony.

Column 3 Indicate when the activity ended, if applicable. (If the activity has not yet ended, indicate "current" or "ongoing.")

Add rows as needed for each activity.

| <i>Company</i> | <i>Description</i> | <i>End Date</i> | <i>For ASH Internal Use</i> |
|----------------|--------------------|-----------------|-----------------------------|
|                |                    |                 |                             |

#### My Partner's or Spouse's Interests

5. Currently or in the past 24 months has *your partner or spouse* had any of the interests or relationships described in questions 1-4?

No

Yes, as described below:

Add rows as needed for each interest.

| <i>Company</i> | <i>Description</i>  | <i>End Date</i> | <i>For ASH Internal Use</i> |
|----------------|---------------------|-----------------|-----------------------------|
| Stryker        | Marketing Associate | Aug 2019        |                             |

#### Other Relevant Direct Financial Interests

6. Do you have other current or recent (within the past 24 months) **direct financial interests** with any institution, organization, entity or individual that could be relevant to the work of developing these guidelines?

No

Yes

If yes, please explain:

## Part B. Indirect Financial Interests

### Institutional Research Funded by For-Profit Healthcare Companies

1. Through your institution, do you currently or in the past 24 months have you been involved in research funded or supported (e.g., in kind support, such as provision of a study drug) by any **for-profit healthcare company**?

No

Yes, as described below:

Column 1 Name the company funding or supporting the research.

Column 2 Briefly describe the research project.

Column 3 Describe your role: (a) national or overall principal investigator, (b) member of a steering committee of a study that does not have a principal investigator, (c) site or local investigator. If other than these options, please describe.

Column 4 Indicate when your involvement ended, if applicable. (If your involvement has not yet ended, indicate “current” or “ongoing.”)

Add rows as needed for each research project.

| <i>Company</i> | <i>Description of Research</i> | <i>My Role</i> | <i>End Date</i> | <i>For ASH Internal Use</i> |
|----------------|--------------------------------|----------------|-----------------|-----------------------------|
|                |                                |                |                 |                             |

### Paid and Volunteer Activities for Organizations Supported by For-Profit Healthcare Companies

2. Do you currently or in the past 24 months have you been involved in any volunteer or paid work for an organization that is wholly or partially funded by any **for-profit healthcare company**?

No

Yes, as described below:

Column 1 Name the organization. If known to you, describe any industry funding or support.

Column 2 Briefly describe your activity and role, e.g., employment, service on board of directors, other volunteer services.

Column 3 Indicate if your activity was paid or volunteered.

Column 4 Indicate when your involvement with the organization ended. (If your involvement has not yet ended, indicate “current” or “ongoing.”)

Add rows as needed for each organization.

| <i>Organization</i> | <i>Description and role</i> | <i>Paid or Unpaid?</i> | <i>End Date</i> | <i>For ASH Internal Use</i> |
|---------------------|-----------------------------|------------------------|-----------------|-----------------------------|
|                     |                             |                        |                 |                             |

Other Relevant Indirect Financial Interests

3. Do you have other **indirect financial interests** with any: (i) **for-profit healthcare** company; or (ii) other institution, organization, entity or individual that could be relevant to the work of developing these guidelines?

No

Yes

If yes, please explain:

## Part C. Relevant Other Interests That Are Not Mainly Financial

### Personal Beliefs

1. Do you have strongly held beliefs related to the topic of these guidelines?

No

Yes

If yes, please explain:

### Previously Published Opinions

2. Have you ever authored, coauthored, or publicly provided an opinion related to the topic of these guidelines, e.g., a clinical practice guideline, textbook, review article, meeting poster or presentation, grand rounds talk, letter to the editor?

No

Yes

If yes, what were those views and where were they made?

### Non-Industry Supported Research

3. Currently or in the past 24 months, have you been involved in a leadership role in any research project not already reported under Part B, Question 1, relevant to the topic of these guidelines, e.g., a research project funded by a nonprofit or governmental organization?

No

Yes, as described below:

Column 1 Name the entity funding the research.

Column 2 Describe the research project.

Column 3 Describe your role: (a) national or overall principal investigator, (b) member of a steering committee of a study that does not have a principal investigator, (c) site or local investigator. If other than these options, please describe.

Column 4 Indicate when your involvement ended, if applicable. (If your involvement has not yet ended, indicate "current" or "ongoing.")

Add rows as needed for each research project.

| <i>Funder</i> | <i>Description of Research</i> | <i>My Role</i> | <i>End Date</i> |
|---------------|--------------------------------|----------------|-----------------|
|               |                                |                |                 |

### Institutional Relationships

4. Could your compensation be affected by recommendations on this topic?

Don't know

No

Yes

If yes, please explain:

5. Do you generate revenues for your institution or employer by clinical activity, teaching, speaking, consulting, testifying, writing, or otherwise sharing your knowledge or opinions about this guideline topic?

Don't know

No

Yes

If yes, please explain:

6. Could your institution benefit or be harmed by guidelines on this topic?

Don't know

No

Yes

If yes, please explain:

### Career Advancement

7. How would you characterize the support you would receive from your primary mentor, institution, or other entities if your work on this panel or authorship of these guidelines generated a strong reaction from peers outside your institution? Excellent Support

### Involvement in Organizations With Relevant Policies, Positions, or Guidelines

8. Are you involved as an employee, volunteer, or member of any organization that has published or to your knowledge is currently developing policies, positions, or guidelines relevant to these ASH guidelines, e.g., clinical practice guidelines, appropriate use criteria, expert consensus statement, mission statement, advocacy statement, amicus brief, or legislature or legal testimony?

No

Yes, as described below:

Column 1 Name the organization.

Column 2 Describe or reference the relevant policy, position, or guidelines.

Column 3 Describe your role with the organization, including your involvement in developing, disseminating, or implementing the relevant policy, position, or guidelines.

Add rows as needed for each organization.

| <i>Organization</i> | <i>Relevant Policy Position</i> | <i>Your Role</i> |
|---------------------|---------------------------------|------------------|
|                     |                                 |                  |

#### Clinical Practice

9. Do you see patients clinically?

No

Yes

If yes, what is your primary specialty or subspecialty?

Medical Student

If yes, do you prescribe or otherwise recommend clinical interventions (e.g., screening or diagnostic tests, evaluations, treatments, procedures) that may be addressed by these guidelines?

No

Yes

If yes, please explain:

#### Other

10. Do you have other nonfinancial interests or relationships not described above that could be relevant to the work of developing these guidelines?

No

Yes

If yes, please describe:



### Expected Interests

11. Do you expect to enter into, within the next 24 months, any new **financial or nonfinancial interests** not described above that could be relevant to the work of developing these guidelines?

No

Yes

If yes, please describe:

## Section 2. Attestation of Compliance With Conflict of Interest Policies

In consideration of my participation on these guidelines, I hereby certify and agree that:

| <i>Policy</i>                                                                                                                                                                                                                                                                                                                                                                                                                                                                                                                                                                                                                                                                                                                                                                                                                                                                                                                                                                                                                                                                                                                                                                                                             | <i>Initials</i> |
|---------------------------------------------------------------------------------------------------------------------------------------------------------------------------------------------------------------------------------------------------------------------------------------------------------------------------------------------------------------------------------------------------------------------------------------------------------------------------------------------------------------------------------------------------------------------------------------------------------------------------------------------------------------------------------------------------------------------------------------------------------------------------------------------------------------------------------------------------------------------------------------------------------------------------------------------------------------------------------------------------------------------------------------------------------------------------------------------------------------------------------------------------------------------------------------------------------------------------|-----------------|
| I have reviewed and understand the ASH Principles and Policies on Conflict of Interest published on the ASH website at <a href="https://www.hematology.org/about/governance/conflict-of-interest">https://www.hematology.org/about/governance/conflict-of-interest</a> including the special Policy on Management of Conflicts in the Development of Clinical Practice Guidelines (“ASH Policy”).                                                                                                                                                                                                                                                                                                                                                                                                                                                                                                                                                                                                                                                                                                                                                                                                                         | PK              |
| I have disclosed and will continue to disclose completely all potential conflicts of interest for myself and for my partner or spouse, to the best of my ability and knowledge, in accordance with ASH Policy and this Disclosure Form.                                                                                                                                                                                                                                                                                                                                                                                                                                                                                                                                                                                                                                                                                                                                                                                                                                                                                                                                                                                   | PK              |
| To ensure completeness and avoid discrepancies, I have checked and periodically will check my financial disclosures against other published information, including from the U.S. Centers for Medicare and Medicaid Services’ Open Payments database (or similar non-U.S. database) and explain any discrepant information.                                                                                                                                                                                                                                                                                                                                                                                                                                                                                                                                                                                                                                                                                                                                                                                                                                                                                                | PK              |
| <p>Until submission of the guidelines for publication, I understand and agree that without special exception from ASH, any of the following will disqualify me from continued participation and I will not enter into:</p> <ul style="list-style-type: none"> <li>• Any <b>direct financial interest</b> of myself or my partner or spouse in any <b>for-profit healthcare company or companies</b>, if such interests in aggregate may be reasonably valued to be &gt;\$5,000/year, regardless of relevance to the guidelines</li> <li>• Any noneducational speaking by myself on behalf of any <b>for-profit healthcare company</b> (e.g., service on a company “speakers bureau”), regardless of relevance to the guidelines</li> <li>• Consulting or advising about the marketing of products by any <b>for-profit healthcare company</b> (e.g., service on a company “advisory board”), regardless of relevance to the guidelines</li> <li>• Simultaneous participation on guidelines by another organization on the same topic</li> <li>• Any <i>undisclosed</i> financial interest in any <b>for-profit healthcare company</b> occurring in the 24 months prior to my participation on these guidelines</li> </ul> | PK              |
| I understand that if a disqualifying interest is reported, the usual course of action will be dismissal from participation and acknowledgment within the guideline publication rather than authorship.                                                                                                                                                                                                                                                                                                                                                                                                                                                                                                                                                                                                                                                                                                                                                                                                                                                                                                                                                                                                                    | PK              |
| At regular intervals during the guideline development process, as determined by ASH, I will review my information in this Disclosure Form; provide updated disclosures; and, if requested, attest that I do not have any interests that should disqualify my participation.                                                                                                                                                                                                                                                                                                                                                                                                                                                                                                                                                                                                                                                                                                                                                                                                                                                                                                                                               | PK              |

|                                                                                                                                                                                                                             |    |
|-----------------------------------------------------------------------------------------------------------------------------------------------------------------------------------------------------------------------------|----|
| I agree to publish with the guidelines my complete disclosures, this agreement, and future attestations.                                                                                                                    | PK |
| I understand that for 1 year following initial publication of the guidelines, I am encouraged by ASH to avoid new conflicts of interest that could reduce trust in the guidelines, in accordance with my own best judgment. | PK |

Agreed by

Philipp Kolb

Date

2 July 2020

### Section 3. ASH Review Prior to Participation

For ASH Internal Use Only

| <i>Name, Role</i>                                                     | <i>Date</i>   | <i>Management Notes</i> |
|-----------------------------------------------------------------------|---------------|-------------------------|
| Eddrika Russell, ASH staff                                            | July 16, 2020 |                         |
| Menaka Pai, MD, Ex Officio ASH<br>Guideline Oversight<br>Subcommittee | July 16, 2020 | Participation approved  |

## Section 4. Disclosures and Attestations During Participation

For ASH Internal Use Only

| <i>Disclosure or attestation</i> | <i>Date</i>                  | <i>Reviewed by</i>     | <i>Management Notes</i>                                          |
|----------------------------------|------------------------------|------------------------|------------------------------------------------------------------|
| Attestation                      | July 2, 2021                 | Russell                | Mr. Kolb agreed to adhere to the policies described herein.      |
| Attestation                      | October 6, 2021              | Russell                | Mr. Kolb agreed to adhere to the policies described herein.      |
|                                  | April 4 <sup>th</sup> , 2022 | Deion Smith, ASH Staff | Mr. Kolb confirmed that all information in this form is correct. |
|                                  |                              |                        |                                                                  |



ASH Clinical Practice Guidelines  
Participant Information

---

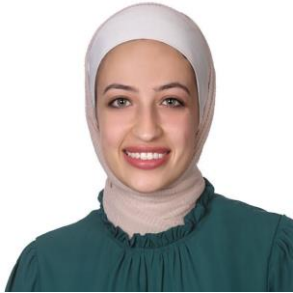

## Razan Mansour, MD

Postdoctoral Research Fellow

King Hussein Cancer Center

Amman, Jordan

---

### Project

ASH Clinical Practice Guidelines on Anticoagulation in Patients with COVID-19

### Role

Review Team Member

### Profile

Dr. Razan Mansour is a Medical Doctor who graduated from the University of Jordan in 2019. She works as a postdoctoral research fellow at King Hussein Cancer Center, the largest cancer center in the Middle East region. Dr. Mansour's main fields of interest include hematology/oncology, and the areas of intersection between biology, ethics and the practice of medicine.

[September 12, 2020 profile approved by Dr. Mansour]

## Section 1. Disclosures Prior to Participation

### Definitions

|                                             |                                                                                                                                                                                                                                                                                                                                                                                                                                                                                                                                                                                                                                                             |
|---------------------------------------------|-------------------------------------------------------------------------------------------------------------------------------------------------------------------------------------------------------------------------------------------------------------------------------------------------------------------------------------------------------------------------------------------------------------------------------------------------------------------------------------------------------------------------------------------------------------------------------------------------------------------------------------------------------------|
| <b><i>Conflict of interest</i></b>          | A situation in which a reasonable person would consider that an individual’s judgments or actions regarding any aspect of the guideline development process is, or could be perceived to be, influenced by an outside interest                                                                                                                                                                                                                                                                                                                                                                                                                              |
| <b><i>Financial interest</i></b>            | A position or relationship held by an individual that offers potential gain or loss of monetary value, such as employment, stock ownership, payment for services, or gifts given with the expectation of reciprocity                                                                                                                                                                                                                                                                                                                                                                                                                                        |
| <b><i>Direct financial interest</i></b>     | A financial interest that is owned by the individual or received directly by the individual                                                                                                                                                                                                                                                                                                                                                                                                                                                                                                                                                                 |
| <b><i>Indirect financial interest</i></b>   | A financial interest that is owned or received via an intermediary, e.g., research funding to an individual received through the individual’s academic institution                                                                                                                                                                                                                                                                                                                                                                                                                                                                                          |
| <b><i>For-profit healthcare company</i></b> | “A for-profit entity that develops, produces, markets, or distributes drugs, devices, services, or therapies used to diagnose, treat, monitor, manage, and alleviate health conditions. This definition is not intended to include non-profit entities, entities outside of the healthcare sector, or entities through which physicians provide clinical services directly to patients” (Council of Medical Specialty Societies’ “Code for Interactions With Industry” 2015). This definition is furthermore not viewed by ASH to include companies that provide accredited continuing medical education or that publish scientific or educational content. |

### Part A. Direct Financial Interests

#### Employment With For-Profit Healthcare Companies

1. Are you currently or in the past 24 months have you been an employee of any **for-profit healthcare company**?

No

Yes, as described below:

Add rows as needed for each employment relationship.

| <i>Company</i> | <i>Description</i> | <i>End Date</i> | <i>For ASH Internal Use</i> |
|----------------|--------------------|-----------------|-----------------------------|
|                |                    |                 |                             |

### Equity in For-Profit Healthcare Companies

2. Do you currently or in the past 24 months have you had equity in any **for-profit healthcare company**? Equity includes stock, stock options, and other ownership interests but excludes diversified mutual fund shares.

No

Yes, as described below:

Add rows as needed for each equity interest.

| <i>Company</i> | <i>Description</i> | <i>Date Divested</i> | <i>For ASH Internal Use</i> |
|----------------|--------------------|----------------------|-----------------------------|
|                |                    |                      |                             |

### Healthcare-Related Patents, Royalties, and Other Intellectual Property

3. Do you currently or in the past 24 months have you owned patents for or received royalties from any intellectual property or product used to diagnose, treat, monitor, manage, or alleviate health conditions?

No

Yes, as described below:

Add rows as needed for each patent or royalty interest.

| <i>Company</i> | <i>Description</i> | <i>Date Divested</i> | <i>For ASH Internal Use</i> |
|----------------|--------------------|----------------------|-----------------------------|
|                |                    |                      |                             |

### Personal Income or Other Direct Transfers of Value From For-Profit Healthcare Companies

4. Do you currently or in the past 24 months have you received any personal income or other direct transfers of value (e.g., honoraria, gifts, travel support, meeting registration, meals) from any **for-profit healthcare company**?

No

Yes, as described below:

Column 1 Name the company.

Column 2 Describe the activity for which you received the income or other transfer of value, e.g., research, consultancy, speakers bureau involvement, service on an advisory committee or board, expert testimony.

Column 3 Indicate when the activity ended, if applicable. (If the activity has not yet ended, indicate "current" or "ongoing.")



Add rows as needed for each activity.

| <i>Company</i> | <i>Description</i> | <i>End Date</i> | <i>For ASH Internal Use</i> |
|----------------|--------------------|-----------------|-----------------------------|
|                |                    |                 |                             |

#### My Partner's or Spouse's Interests

5. Currently or in the past 24 months has *your partner or spouse* had any of the interests or relationships described in questions 1-4?

No

Yes, as described below:

Add rows as needed for each interest.

| <i>Company</i> | <i>Description</i> | <i>End Date</i> | <i>For ASH Internal Use</i> |
|----------------|--------------------|-----------------|-----------------------------|
|                |                    |                 |                             |

#### Other Relevant Direct Financial Interests

6. Do you have other current or recent (within the past 24 months) **direct financial interests** with any institution, organization, entity or individual that could be relevant to the work of developing these guidelines?

No

Yes

If yes, please explain:

#### Part B. Indirect Financial Interests

##### Institutional Research Funded by For-Profit Healthcare Companies

1. Through your institution, do you currently or in the past 24 months have you been involved in research funded or supported (e.g., in kind support, such as provision of a study drug) by any **for-profit healthcare company**?

No

Yes, as described below:

Column 1 Name the company funding or supporting the research.

Column 2 Briefly describe the research project.

Column 3 Describe your role: (a) national or overall principal investigator, (b) member of a steering committee of a study that does not have a principal investigator, (c) site or local investigator. If other than these options, please describe.

Column 4 Indicate when your involvement ended, if applicable. (If your involvement has not yet ended, indicate “current” or “ongoing.”)

Add rows as needed for each research project.

| <i>Company</i> | <i>Description of Research</i> | <i>My Role</i> | <i>End Date</i> | <i>For ASH Internal Use</i> |
|----------------|--------------------------------|----------------|-----------------|-----------------------------|
|                |                                |                |                 |                             |

Paid and Volunteer Activities for Organizations Supported by For-Profit Healthcare Companies

2. Do you currently or in the past 24 months have you been involved in any volunteer or paid work for an organization that is wholly or partially funded by any **for-profit healthcare company**?

No

Yes, as described below:

Column 1 Name the organization. If known to you, describe any industry funding or support.

Column 2 Briefly describe your activity and role, e.g., employment, service on board of directors, other volunteer services.

Column 3 Indicate if your activity was paid or volunteered.

Column 4 Indicate when your involvement with the organization ended. (If your involvement has not yet ended, indicate “current” or “ongoing.”)

Add rows as needed for each organization.

| <i>Organization</i> | <i>Description and role</i> | <i>Paid or Unpaid?</i> | <i>End Date</i> | <i>For ASH Internal Use</i> |
|---------------------|-----------------------------|------------------------|-----------------|-----------------------------|
|                     |                             |                        |                 |                             |

Other Relevant Indirect Financial Interests

3. Do you have other **indirect financial interests** with any: (i) **for-profit healthcare company**; or (ii) other institution, organization, entity or individual that could be relevant to the work of developing these guidelines?

No

Yes

If yes, please explain:

Part C. Relevant Other Interests That Are Not Mainly Financial

Personal Beliefs

1. Do you have strongly held beliefs related to the topic of these guidelines?

No

Yes

If yes, please explain:

### Previously Published Opinions

2. Have you ever authored, coauthored, or publicly provided an opinion related to the topic of these guidelines, e.g., a clinical practice guideline, textbook, review article, meeting poster or presentation, grand rounds talk, letter to the editor?

No

Yes

If yes, what were those views and where were they made?

### Non-Industry Supported Research

3. Currently or in the past 24 months, have you been involved in a leadership role in any research project not already reported under Part B, Question 1, relevant to the topic of these guidelines, e.g., a research project funded by a nonprofit or governmental organization?

No

Yes, as described below:

Column 1 Name the entity funding the research.

Column 2 Describe the research project.

Column 3 Describe your role: (a) national or overall principal investigator, (b) member of a steering committee of a study that does not have a principal investigator, (c) site or local investigator. If other than these options, please describe.

Column 4 Indicate when your involvement ended, if applicable. (If your involvement has not yet ended, indicate "current" or "ongoing.")

Add rows as needed for each research project.

| <i>Funder</i> | <i>Description of Research</i> | <i>My Role</i> | <i>End Date</i> |
|---------------|--------------------------------|----------------|-----------------|
|               |                                |                |                 |

### Institutional Relationships

4. Could your compensation be affected by recommendations on this topic?

Don't know

No

Yes

If yes, please explain:

5. Do you generate revenues for your institution or employer by clinical activity, teaching, speaking, consulting, testifying, writing, or otherwise sharing your knowledge or opinions about this guideline topic?

Don't know

No

Yes

If yes, please explain:

6. Could your institution benefit or be harmed by guidelines on this topic?

Don't know

No

Yes

If yes, please explain:

#### Career Advancement

7. How would you characterize the support you would receive from your primary mentor, institution, or other entities if your work on this panel or authorship of these guidelines generated a strong reaction from peers outside your institution? -As a research fellow, I have full institutional support if my contribution to this panel was to create a strong reaction from peers outside/inside my institution.

#### Involvement in Organizations With Relevant Policies, Positions, or Guidelines

8. Are you involved as an employee, volunteer, or member of any organization that has published or to your knowledge is currently developing policies, positions, or guidelines relevant to these ASH guidelines, e.g., clinical practice guidelines, appropriate use criteria, expert consensus statement, mission statement, advocacy statement, amicus brief, or legislature or legal testimony?

No

Yes, as described below:

Column 1 Name the organization.

Column 2 Describe or reference the relevant policy, position, or guidelines.

Column 3 Describe your role with the organization, including your involvement in developing, disseminating, or implementing the relevant policy, position, or guidelines.

Add rows as needed for each organization.

| <i>Organization</i> | <i>Relevant Policy Position</i> | <i>Your Role</i> |
|---------------------|---------------------------------|------------------|
|                     |                                 |                  |

### Clinical Practice

9. Do you see patients clinically?

No

Yes

If yes, what is your primary specialty or subspecialty?

If yes, do you prescribe or otherwise recommend clinical interventions (e.g., screening or diagnostic tests, evaluations, treatments, procedures) that may be addressed by these guidelines?

No

Yes

If yes, please explain:

### Other

10. Do you have other nonfinancial interests or relationships not described above that could be relevant to the work of developing these guidelines?

No

Yes

If yes, please describe:

### Expected Interests

11. Do you expect to enter into, within the next 24 months, any new **financial or nonfinancial interests** not described above that could be relevant to the work of developing these guidelines?

No

Yes

If yes, please describe:

## Section 2. Attestation of Compliance With Conflict of Interest Policies

In consideration of my participation on these guidelines, I hereby certify and agree that:

| <i>Policy</i>                                                                                                                                                                                                                                                                                                                                                                                                                                                                                                                                                                                                                                                                                                                                                                                                                                                                                                                                                                                                                                                                                                                                                                                                             | <i>Initials</i> |
|---------------------------------------------------------------------------------------------------------------------------------------------------------------------------------------------------------------------------------------------------------------------------------------------------------------------------------------------------------------------------------------------------------------------------------------------------------------------------------------------------------------------------------------------------------------------------------------------------------------------------------------------------------------------------------------------------------------------------------------------------------------------------------------------------------------------------------------------------------------------------------------------------------------------------------------------------------------------------------------------------------------------------------------------------------------------------------------------------------------------------------------------------------------------------------------------------------------------------|-----------------|
| I have reviewed and understand the ASH Principles and Policies on Conflict of Interest published on the ASH website at <a href="https://www.hematology.org/about/governance/conflict-of-interest">https://www.hematology.org/about/governance/conflict-of-interest</a> including the special Policy on Management of Conflicts in the Development of Clinical Practice Guidelines (“ASH Policy”).                                                                                                                                                                                                                                                                                                                                                                                                                                                                                                                                                                                                                                                                                                                                                                                                                         | R.M             |
| I have disclosed and will continue to disclose completely all potential conflicts of interest for myself and for my partner or spouse, to the best of my ability and knowledge, in accordance with ASH Policy and this Disclosure Form.                                                                                                                                                                                                                                                                                                                                                                                                                                                                                                                                                                                                                                                                                                                                                                                                                                                                                                                                                                                   | R.M             |
| To ensure completeness and avoid discrepancies, I have checked and periodically will check my financial disclosures against other published information, including from the U.S. Centers for Medicare and Medicaid Services’ Open Payments database (or similar non-U.S. database) and explain any discrepant information.                                                                                                                                                                                                                                                                                                                                                                                                                                                                                                                                                                                                                                                                                                                                                                                                                                                                                                | R.M             |
| <p>Until submission of the guidelines for publication, I understand and agree that without special exception from ASH, any of the following will disqualify me from continued participation and I will not enter into:</p> <ul style="list-style-type: none"> <li>• Any <b>direct financial interest</b> of myself or my partner or spouse in any <b>for-profit healthcare company or companies</b>, if such interests in aggregate may be reasonably valued to be &gt;\$5,000/year, regardless of relevance to the guidelines</li> <li>• Any noneducational speaking by myself on behalf of any <b>for-profit healthcare company</b> (e.g., service on a company “speakers bureau”), regardless of relevance to the guidelines</li> <li>• Consulting or advising about the marketing of products by any <b>for-profit healthcare company</b> (e.g., service on a company “advisory board”), regardless of relevance to the guidelines</li> <li>• Simultaneous participation on guidelines by another organization on the same topic</li> <li>• Any <i>undisclosed</i> financial interest in any <b>for-profit healthcare company</b> occurring in the 24 months prior to my participation on these guidelines</li> </ul> | R.M             |
| I understand that if a disqualifying interest is reported, the usual course of action will be dismissal from participation and acknowledgment within the guideline publication rather than authorship.                                                                                                                                                                                                                                                                                                                                                                                                                                                                                                                                                                                                                                                                                                                                                                                                                                                                                                                                                                                                                    | R.M             |
| At regular intervals during the guideline development process, as determined by ASH, I will review my information in this Disclosure Form; provide updated disclosures; and, if requested, attest that I do not have any interests that should disqualify my participation.                                                                                                                                                                                                                                                                                                                                                                                                                                                                                                                                                                                                                                                                                                                                                                                                                                                                                                                                               | R.M             |

|                                                                                                                                                                                                                             |     |
|-----------------------------------------------------------------------------------------------------------------------------------------------------------------------------------------------------------------------------|-----|
| I agree to publish with the guidelines my complete disclosures, this agreement, and future attestations.                                                                                                                    | R.M |
| I understand that for 1 year following initial publication of the guidelines, I am encouraged by ASH to avoid new conflicts of interest that could reduce trust in the guidelines, in accordance with my own best judgment. | R.M |

Agreed by [Razan Mansour]

Date [8/28/2020]



### Section 3. ASH Review Prior to Participation

For ASH Internal Use Only

| <i>Name, Role</i>                                                     | <i>Date</i>     | <i>Management Notes</i> |
|-----------------------------------------------------------------------|-----------------|-------------------------|
| Eddrika Russell, ASH Staff                                            | August 31, 2020 |                         |
| Menaka Pai, MD, Ex Officio ASH<br>Guideline Oversight<br>Subcommittee | August 31, 2020 | Participation approved  |

## Section 4. Disclosures and Attestations During Participation

For ASH Internal Use Only

| <i>Disclosure or attestation</i> | <i>Date</i>      | <i>Reviewed by</i>     | <i>Management Notes</i>                                             |
|----------------------------------|------------------|------------------------|---------------------------------------------------------------------|
| Attestation                      | June 30, 2021    | Russell                | Dr. Mansour agreed to adhere to the policies described herein.      |
| Attestation                      | October 5, 2021  | Russell                | Dr. Mansour agreed to adhere to the policies described herein.      |
| Attestation                      | January 18, 2022 | Deion Smith, ASH Staff | Dr. Mansour agreed to adhere to the policies described herein.      |
|                                  | April 6, 2022    | Smith                  | Dr. Mansour confirmed that all information in this form is correct. |



ASH Clinical Practice Guidelines  
Participant Information

---

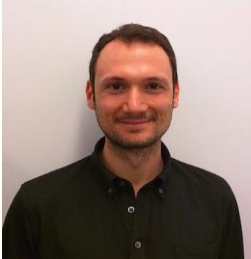

Gian Paolo Morgano, PhD, MSc

Researcher, Methodologist

McMaster University

Hamilton, Ontario, Canada

---

### Project

ASH Clinical Practice Guidelines on Anticoagulation in Patients with COVID-19

### Role

Review Team Member

### Profile

Gian Paolo Morgano is a researcher and methodologist with an interest in evidence synthesis using qualitative and quantitative methods, development of health measurement scales, health technology assessment. His work as clinical practice guideline methodologist has informed the production of guidelines for several health organizations including the World Health Organization (WHO), American Society of Hematology (ASH), Work Allergy Organization (WAO), and the Italian Minister of Health (ISS).

[July 15, 2020 profile approved by Dr. Morgano]

## Section 1. Disclosures Prior to Participation

### Definitions

**Conflict of interest**

A situation in which a reasonable person would consider that an individual’s judgments or actions regarding any aspect of the guideline development process is, or could be perceived to be, influenced by an outside interest

**Financial interest**

A position or relationship held by an individual that offers potential gain or loss of monetary value, such as employment, stock ownership, payment for services, or gifts given with the expectation of reciprocity

**Direct financial interest**

A financial interest that is owned by the individual or received directly by the individual

**Indirect financial interest**

A financial interest that is owned or received via an intermediary, e.g., research funding to an individual received through the individual’s academic institution

**For-profit healthcare company**

“A for-profit entity that develops, produces, markets, or distributes drugs, devices, services, or therapies used to diagnose, treat, monitor, manage, and alleviate health conditions. This definition is not intended to include non-profit entities, entities outside of the healthcare sector, or entities through which physicians provide clinical services directly to patients” (Council of Medical Specialty Societies’ “Code for Interactions With Industry” 2015). This definition is furthermore not viewed by ASH to include companies that provide accredited continuing medical education or that publish scientific or educational content.

### Part A. Direct Financial Interests

#### Employment With For-Profit Healthcare Companies

1. Are you currently or in the past 24 months have you been an employee of any **for-profit healthcare company**?

No

Yes, as described below:

Add rows as needed for each employment relationship.

| <i>Company</i> | <i>Description</i> | <i>End Date</i> | <i>For ASH Internal Use</i> |
|----------------|--------------------|-----------------|-----------------------------|
|                |                    |                 |                             |

### Equity in For-Profit Healthcare Companies

2. Do you currently or in the past 24 months have you had equity in any **for-profit healthcare company**? Equity includes stock, stock options, and other ownership interests but excludes diversified mutual fund shares.

No

Yes, as described below:

Add rows as needed for each equity interest.

| <i>Company</i> | <i>Description</i> | <i>Date Divested</i> | <i>For ASH Internal Use</i> |
|----------------|--------------------|----------------------|-----------------------------|
|                |                    |                      |                             |

### Healthcare-Related Patents, Royalties, and Other Intellectual Property

3. Do you currently or in the past 24 months have you owned patents for or received royalties from any intellectual property or product used to diagnose, treat, monitor, manage, or alleviate health conditions?

No

Yes, as described below:

Add rows as needed for each patent or royalty interest.

| <i>Company</i> | <i>Description</i> | <i>Date Divested</i> | <i>For ASH Internal Use</i> |
|----------------|--------------------|----------------------|-----------------------------|
|                |                    |                      |                             |

### Personal Income or Other Direct Transfers of Value From For-Profit Healthcare Companies

4. Do you currently or in the past 24 months have you received any personal income or other direct transfers of value (e.g., honoraria, gifts, travel support, meeting registration, meals) from any **for-profit healthcare company**?

No

Yes, as described below:

Column 1 Name the company.

Column 2 Describe the activity for which you received the income or other transfer of value, e.g., research, consultancy, speakers bureau involvement, service on an advisory committee or board, expert testimony.

Column 3 Indicate when the activity ended, if applicable. (If the activity has not yet ended, indicate “current” or “ongoing.”)

Add rows as needed for each activity.

| <i>Company</i> | <i>Description</i> | <i>End Date</i> | <i>For ASH Internal Use</i> |
|----------------|--------------------|-----------------|-----------------------------|
|                |                    |                 |                             |

#### My Partner’s or Spouse’s Interests

5. Currently or in the past 24 months has *your partner or spouse* had any of the interests or relationships described in questions 1-4?

No

Yes, as described below:

Add rows as needed for each interest.

| <i>Company</i> | <i>Description</i> | <i>End Date</i> | <i>For ASH Internal Use</i> |
|----------------|--------------------|-----------------|-----------------------------|
|                |                    |                 |                             |

#### Other Relevant Direct Financial Interests

6. Do you have other current or recent (within the past 24 months) **direct financial interests** with any institution, organization, entity or individual that could be relevant to the work of developing these guidelines?

No

Yes

If yes, please explain:

## Part B. Indirect Financial Interests

### Institutional Research Funded by For-Profit Healthcare Companies

1. Through your institution, do you currently or in the past 24 months have you been involved in research funded or supported (e.g., in kind support, such as provision of a study drug) by any **for-profit healthcare company**?

No

Yes, as described below:

Column 1 Name the company funding or supporting the research.

Column 2 Briefly describe the research project.

Column 3 Describe your role: (a) national or overall principal investigator, (b) member of a steering committee of a study that does not have a principal investigator, (c) site or local investigator. If other than these options, please describe.

Column 4 Indicate when your involvement ended, if applicable. (If your involvement has not yet ended, indicate “current” or “ongoing.”)

Add rows as needed for each research project.

| <i>Company</i> | <i>Description of Research</i> | <i>My Role</i> | <i>End Date</i> | <i>For ASH Internal Use</i> |
|----------------|--------------------------------|----------------|-----------------|-----------------------------|
|                |                                |                |                 |                             |

### Paid and Volunteer Activities for Organizations Supported by For-Profit Healthcare Companies

2. Do you currently or in the past 24 months have you been involved in any volunteer or paid work for an organization that is wholly or partially funded by any **for-profit healthcare company**?

No

Yes, as described below:

Column 1 Name the organization. If known to you, describe any industry funding or support.

Column 2 Briefly describe your activity and role, e.g., employment, service on board of directors, other volunteer services.

Column 3 Indicate if your activity was paid or volunteered.

Column 4 Indicate when your involvement with the organization ended. (If your involvement has not yet ended, indicate “current” or “ongoing.”)

Add rows as needed for each organization.

| <i>Organization</i> | <i>Description and role</i> | <i>Paid or Unpaid?</i> | <i>End Date</i> | <i>For ASH Internal Use</i> |
|---------------------|-----------------------------|------------------------|-----------------|-----------------------------|
|                     |                             |                        |                 |                             |

Other Relevant Indirect Financial Interests

3. Do you have other **indirect financial interests** with any: (i) **for-profit healthcare** company; or (ii) other institution, organization, entity or individual that could be relevant to the work of developing these guidelines?

No

Yes

If yes, please explain:



## Part C. Relevant Other Interests That Are Not Mainly Financial

### Personal Beliefs

1. Do you have strongly held beliefs related to the topic of these guidelines?

No

Yes

If yes, please explain:

### Previously Published Opinions

2. Have you ever authored, coauthored, or publicly provided an opinion related to the topic of these guidelines, e.g., a clinical practice guideline, textbook, review article, meeting poster or presentation, grand rounds talk, letter to the editor?

No

Yes

If yes, what were those views and where were they made?

### Non-Industry Supported Research

3. Currently or in the past 24 months, have you been involved in a leadership role in any research project not already reported under Part B, Question 1, relevant to the topic of these guidelines, e.g., a research project funded by a nonprofit or governmental organization?

No

Yes, as described below:

Column 1 Name the entity funding the research.

Column 2 Describe the research project.

Column 3 Describe your role: (a) national or overall principal investigator, (b) member of a steering committee of a study that does not have a principal investigator, (c) site or local investigator. If other than these options, please describe.

Column 4 Indicate when your involvement ended, if applicable. (If your involvement has not yet ended, indicate "current" or "ongoing.")

Add rows as needed for each research project.

| <i>Funder</i> | <i>Description of Research</i> | <i>My Role</i> | <i>End Date</i> |
|---------------|--------------------------------|----------------|-----------------|
|               |                                |                |                 |

### Institutional Relationships

4. Could your compensation be affected by recommendations on this topic?

Don't know

No

Yes

If yes, please explain:

5. Do you generate revenues for your institution or employer by clinical activity, teaching, speaking, consulting, testifying, writing, or otherwise sharing your knowledge or opinions about this guideline topic?

Don't know

No

Yes

If yes, please explain:

6. Could your institution benefit or be harmed by guidelines on this topic?

Don't know

No

Yes

If yes, please explain:

### Career Advancement

7. How would you characterize the support you would receive from your primary mentor, institution, or other entities if your work on this panel or authorship of these guidelines generated a strong reaction from peers outside your institution?

In case of a positive reaction, the citations that these guidelines will receive would have a beneficial impact on the indicators of my performance as a researcher (e.g. h-index, number of citations).

Involvement in Organizations With Relevant Policies, Positions, or Guidelines

8. Are you involved as an employee, volunteer, or member of any organization that has published or to your knowledge is currently developing policies, positions, or guidelines relevant to these ASH guidelines, e.g., clinical practice guidelines, appropriate use criteria, expert consensus statement, mission statement, advocacy statement, amicus brief, or legislature or legal testimony?

No

Yes, as described below:

Column 1 Name the organization.

Column 2 Describe or reference the relevant policy, position, or guidelines.

Column 3 Describe your role with the organization, including your involvement in developing, disseminating, or implementing the relevant policy, position, or guidelines.

Add rows as needed for each organization.

| <i>Organization</i> | <i>Relevant Policy Position</i> | <i>Your Role</i> |
|---------------------|---------------------------------|------------------|
|                     |                                 |                  |

Clinical Practice

9. Do you see patients clinically?

No

Yes

If yes, what is your primary specialty or subspecialty?

If yes, do you prescribe or otherwise recommend clinical interventions (e.g., screening or diagnostic tests, evaluations, treatments, procedures) that may be addressed by these guidelines?

No

Yes

If yes, please explain:

Other

10. Do you have other nonfinancial interests or relationships not described above that could be relevant to the work of developing these guidelines?

No

Yes

If yes, please describe:

#### Expected Interests

11. Do you expect to enter into, within the next 24 months, any new **financial or nonfinancial interests** not described above that could be relevant to the work of developing these guidelines?

No

Yes

If yes, please describe:

## Section 2. Attestation of Compliance With Conflict of Interest Policies

In consideration of my participation on these guidelines, I hereby certify and agree that:

| <i>Policy</i>                                                                                                                                                                                                                                                                                                                                                                                                                                                                                                                                                                                                                                                                                                                                                                                                                                                                                                                                                                                                                                                                                                                                                                                                             | <i>Initials</i> |
|---------------------------------------------------------------------------------------------------------------------------------------------------------------------------------------------------------------------------------------------------------------------------------------------------------------------------------------------------------------------------------------------------------------------------------------------------------------------------------------------------------------------------------------------------------------------------------------------------------------------------------------------------------------------------------------------------------------------------------------------------------------------------------------------------------------------------------------------------------------------------------------------------------------------------------------------------------------------------------------------------------------------------------------------------------------------------------------------------------------------------------------------------------------------------------------------------------------------------|-----------------|
| I have reviewed and understand the ASH Principles and Policies on Conflict of Interest published on the ASH website at <a href="https://www.hematology.org/about/governance/conflict-of-interest">https://www.hematology.org/about/governance/conflict-of-interest</a> including the special Policy on Management of Conflicts in the Development of Clinical Practice Guidelines (“ASH Policy”).                                                                                                                                                                                                                                                                                                                                                                                                                                                                                                                                                                                                                                                                                                                                                                                                                         | GPM             |
| I have disclosed and will continue to disclose completely all potential conflicts of interest for myself and for my partner or spouse, to the best of my ability and knowledge, in accordance with ASH Policy and this Disclosure Form.                                                                                                                                                                                                                                                                                                                                                                                                                                                                                                                                                                                                                                                                                                                                                                                                                                                                                                                                                                                   | GPM             |
| To ensure completeness and avoid discrepancies, I have checked and periodically will check my financial disclosures against other published information, including from the U.S. Centers for Medicare and Medicaid Services’ Open Payments database (or similar non-U.S. database) and explain any discrepant information.                                                                                                                                                                                                                                                                                                                                                                                                                                                                                                                                                                                                                                                                                                                                                                                                                                                                                                | GPM             |
| <p>Until submission of the guidelines for publication, I understand and agree that without special exception from ASH, any of the following will disqualify me from continued participation and I will not enter into:</p> <ul style="list-style-type: none"> <li>• Any <b>direct financial interest</b> of myself or my partner or spouse in any <b>for-profit healthcare company or companies</b>, if such interests in aggregate may be reasonably valued to be &gt;\$5,000/year, regardless of relevance to the guidelines</li> <li>• Any noneducational speaking by myself on behalf of any <b>for-profit healthcare company</b> (e.g., service on a company “speakers bureau”), regardless of relevance to the guidelines</li> <li>• Consulting or advising about the marketing of products by any <b>for-profit healthcare company</b> (e.g., service on a company “advisory board”), regardless of relevance to the guidelines</li> <li>• Simultaneous participation on guidelines by another organization on the same topic</li> <li>• Any <i>undisclosed</i> financial interest in any <b>for-profit healthcare company</b> occurring in the 24 months prior to my participation on these guidelines</li> </ul> | GPM             |
| I understand that if a disqualifying interest is reported, the usual course of action will be dismissal from participation and acknowledgment within the guideline publication rather than authorship.                                                                                                                                                                                                                                                                                                                                                                                                                                                                                                                                                                                                                                                                                                                                                                                                                                                                                                                                                                                                                    | GPM             |
| At regular intervals during the guideline development process, as determined by ASH, I will review my information in this Disclosure Form; provide updated disclosures; and, if requested, attest that I do not have any interests that should disqualify my participation.                                                                                                                                                                                                                                                                                                                                                                                                                                                                                                                                                                                                                                                                                                                                                                                                                                                                                                                                               | GPM             |

|                                                                                                                                                                                                                             |     |
|-----------------------------------------------------------------------------------------------------------------------------------------------------------------------------------------------------------------------------|-----|
| I agree to publish with the guidelines my complete disclosures, this agreement, and future attestations.                                                                                                                    | GPM |
| I understand that for 1 year following initial publication of the guidelines, I am encouraged by ASH to avoid new conflicts of interest that could reduce trust in the guidelines, in accordance with my own best judgment. | GPM |

Agreed by

Gian Paolo Morgano

Date

June 27th, 2020

### Section 3. ASH Review Prior to Participation

For ASH Internal Use Only

| <i>Name, Role</i>                                                     | <i>Date</i>   | <i>Management Notes</i> |
|-----------------------------------------------------------------------|---------------|-------------------------|
| Eddrika Russell, ASH staff                                            | July 15, 2020 |                         |
| Menaka Pai, MD, Ex Officio ASH<br>Guideline Oversight<br>Subcommittee | July 15, 2020 | Participation approved  |

## Section 4. Disclosures and Attestations During Participation

For ASH Internal Use Only

| <i>Disclosure or attestation</i> | <i>Date</i>                  | <i>Reviewed by</i>     | <i>Management Notes</i>                                             |
|----------------------------------|------------------------------|------------------------|---------------------------------------------------------------------|
| Attestation                      | June 30, 2021                | Russell                | Dr. Morgano agreed to adhere to the policies described herein.      |
| Attestation                      | October 2, 2021              | Russell                | Dr. Morgano agreed to adhere to the policies described herein.      |
|                                  | April 1 <sup>st</sup> , 2022 | Deion Smith, ASH Staff | Dr. Morgano confirmed that all information in this form is correct. |





ASH Clinical Practice Guidelines  
Participant Information

---

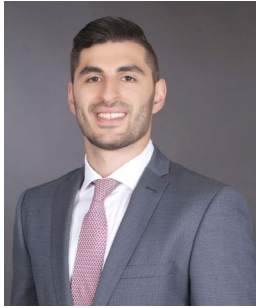

## Rami Morsi, MD

Neurology Resident

University of Chicago

Chicago, Illinois, United States

---

### Project

ASH Clinical Practice Guidelines on Anticoagulation in Patients with COVID-19

### Role

Review Team Member

### Profile

Dr. Rami Morsi is a resident physician in Neurology at University of Chicago. Prior to his role at University of Chicago, he was a post-doctoral research fellow in the Department of Neurology at Massachusetts General Hospital with a particular interest in a career as a physician-scientist in the fields of vascular and interventional neurology. Dr. Morsi received his Doctor of Medicine degree from the American University of Beirut in 2018, and his work has been published in fifteen peer-reviewed journals, including *Blood* and *Blood Advances*.

[September 11, 2020, profile approved by Dr. Morsi. Updated March 31, 2022.]

## Section 1. Disclosures Prior to Participation

### Definitions

**Conflict of interest**

A situation in which a reasonable person would consider that an individual’s judgments or actions regarding any aspect of the guideline development process is, or could be perceived to be, influenced by an outside interest

**Financial interest**

A position or relationship held by an individual that offers potential gain or loss of monetary value, such as employment, stock ownership, payment for services, or gifts given with the expectation of reciprocity

**Direct financial interest**

A financial interest that is owned by the individual or received directly by the individual

**Indirect financial interest**

A financial interest that is owned or received via an intermediary, e.g., research funding to an individual received through the individual’s academic institution

**For-profit healthcare company**

“A for-profit entity that develops, produces, markets, or distributes drugs, devices, services, or therapies used to diagnose, treat, monitor, manage, and alleviate health conditions. This definition is not intended to include non-profit entities, entities outside of the healthcare sector, or entities through which physicians provide clinical services directly to patients” (Council of Medical Specialty Societies’ “Code for Interactions With Industry” 2015). This definition is furthermore not viewed by ASH to include companies that provide accredited continuing medical education or that publish scientific or educational content.

### Part A. Direct Financial Interests

#### Employment With For-Profit Healthcare Companies

1. Are you currently or in the past 24 months have you been an employee of any **for-profit healthcare company**?

No

Yes, as described below:

Add rows as needed for each employment relationship.

| <i>Company</i> | <i>Description</i> | <i>End Date</i> | <i>For ASH Internal Use</i> |
|----------------|--------------------|-----------------|-----------------------------|
|                |                    |                 |                             |

### Equity in For-Profit Healthcare Companies

2. Do you currently or in the past 24 months have you had equity in any **for-profit healthcare company**? Equity includes stock, stock options, and other ownership interests but excludes diversified mutual fund shares.

No

Yes, as described below:

Add rows as needed for each equity interest.

| <i>Company</i> | <i>Description</i> | <i>Date Divested</i> | <i>For ASH Internal Use</i> |
|----------------|--------------------|----------------------|-----------------------------|
|                |                    |                      |                             |

### Healthcare-Related Patents, Royalties, and Other Intellectual Property

3. Do you currently or in the past 24 months have you owned patents for or received royalties from any intellectual property or product used to diagnose, treat, monitor, manage, or alleviate health conditions?

No

Yes, as described below:

Add rows as needed for each patent or royalty interest.

| <i>Company</i> | <i>Description</i> | <i>Date Divested</i> | <i>For ASH Internal Use</i> |
|----------------|--------------------|----------------------|-----------------------------|
|                |                    |                      |                             |

### Personal Income or Other Direct Transfers of Value From For-Profit Healthcare Companies

4. Do you currently or in the past 24 months have you received any personal income or other direct transfers of value (e.g., honoraria, gifts, travel support, meeting registration, meals) from any **for-profit healthcare company**?

No

Yes, as described below:

Column 1 Name the company.

Column 2 Describe the activity for which you received the income or other transfer of value, e.g., research, consultancy, speakers bureau involvement, service on an advisory committee or board, expert testimony.

Column 3 Indicate when the activity ended, if applicable. (If the activity has not yet ended, indicate "current" or "ongoing.")

Add rows as needed for each activity.

| <i>Company</i> | <i>Description</i> | <i>End Date</i> | <i>For ASH Internal Use</i> |
|----------------|--------------------|-----------------|-----------------------------|
|                |                    |                 |                             |

#### My Partner's or Spouse's Interests

5. Currently or in the past 24 months has *your partner or spouse* had any of the interests or relationships described in questions 1-4?

No

Yes, as described below:

Add rows as needed for each interest.

| <i>Company</i> | <i>Description</i> | <i>End Date</i> | <i>For ASH Internal Use</i> |
|----------------|--------------------|-----------------|-----------------------------|
|                |                    |                 |                             |

#### Other Relevant Direct Financial Interests

6. Do you have other current or recent (within the past 24 months) **direct financial interests** with any institution, organization, entity or individual that could be relevant to the work of developing these guidelines?

No

Yes

If yes, please explain:

## Part B. Indirect Financial Interests

### Institutional Research Funded by For-Profit Healthcare Companies

1. Through your institution, do you currently or in the past 24 months have you been involved in research funded or supported (e.g., in kind support, such as provision of a study drug) by any **for-profit healthcare company**?

No

Yes, as described below:

Column 1 Name the company funding or supporting the research.

Column 2 Briefly describe the research project.

Column 3 Describe your role: (a) national or overall principal investigator, (b) member of a steering committee of a study that does not have a principal investigator, (c) site or local investigator. If other than these options, please describe.

Column 4 Indicate when your involvement ended, if applicable. (If your involvement has not yet ended, indicate “current” or “ongoing.”)

Add rows as needed for each research project.

| <i>Company</i> | <i>Description of Research</i> | <i>My Role</i> | <i>End Date</i> | <i>For ASH Internal Use</i> |
|----------------|--------------------------------|----------------|-----------------|-----------------------------|
|                |                                |                |                 |                             |

### Paid and Volunteer Activities for Organizations Supported by For-Profit Healthcare Companies

2. Do you currently or in the past 24 months have you been involved in any volunteer or paid work for an organization that is wholly or partially funded by any **for-profit healthcare company**?

No

Yes, as described below:

Column 1 Name the organization. If known to you, describe any industry funding or support.

Column 2 Briefly describe your activity and role, e.g., employment, service on board of directors, other volunteer services.

Column 3 Indicate if your activity was paid or volunteered.

Column 4 Indicate when your involvement with the organization ended. (If your involvement has not yet ended, indicate “current” or “ongoing.”)

Add rows as needed for each organization.

| <i>Organization</i> | <i>Description and role</i> | <i>Paid or Unpaid?</i> | <i>End Date</i> | <i>For ASH Internal Use</i> |
|---------------------|-----------------------------|------------------------|-----------------|-----------------------------|
|                     |                             |                        |                 |                             |

Other Relevant Indirect Financial Interests

3. Do you have other **indirect financial interests** with any: (i) **for-profit healthcare** company; or (ii) other institution, organization, entity or individual that could be relevant to the work of developing these guidelines?

No

Yes

If yes, please explain:

## Part C. Relevant Other Interests That Are Not Mainly Financial

### Personal Beliefs

1. Do you have strongly held beliefs related to the topic of these guidelines?

No

Yes

If yes, please explain:

### Previously Published Opinions

2. Have you ever authored, coauthored, or publicly provided an opinion related to the topic of these guidelines, e.g., a clinical practice guideline, textbook, review article, meeting poster or presentation, grand rounds talk, letter to the editor?

No

Yes

If yes, what were those views and where were they made?

### Non-Industry Supported Research

3. Currently or in the past 24 months, have you been involved in a leadership role in any research project not already reported under Part B, Question 1, relevant to the topic of these guidelines, e.g., a research project funded by a nonprofit or governmental organization?

No

Yes, as described below:

Column 1 Name the entity funding the research.

Column 2 Describe the research project.

Column 3 Describe your role: (a) national or overall principal investigator, (b) member of a steering committee of a study that does not have a principal investigator, (c) site or local investigator. If other than these options, please describe.

Column 4 Indicate when your involvement ended, if applicable. (If your involvement has not yet ended, indicate "current" or "ongoing.")

Add rows as needed for each research project.

| <i>Funder</i> | <i>Description of Research</i> | <i>My Role</i> | <i>End Date</i> |
|---------------|--------------------------------|----------------|-----------------|
|               |                                |                |                 |

### Institutional Relationships

4. Could your compensation be affected by recommendations on this topic?

Don't know

No

Yes

If yes, please explain:

5. Do you generate revenues for your institution or employer by clinical activity, teaching, speaking, consulting, testifying, writing, or otherwise sharing your knowledge or opinions about this guideline topic?

Don't know

No

Yes

If yes, please explain:

6. Could your institution benefit or be harmed by guidelines on this topic?

Don't know

No

Yes

If yes, please explain:

### Career Advancement

7. How would you characterize the support you would receive from your primary mentor, institution, or other entities if your work on this panel or authorship of these guidelines generated a strong reaction from peers outside your institution?

Great support from peers and institution.

### Involvement in Organizations With Relevant Policies, Positions, or Guidelines

8. Are you involved as an employee, volunteer, or member of any organization that has published or to your knowledge is currently developing policies, positions, or guidelines relevant to these ASH guidelines, e.g., clinical practice guidelines, appropriate use criteria, expert consensus statement, mission statement, advocacy statement, amicus brief, or legislature or legal testimony?



No

Yes, as described below:

Column 1 Name the organization.

Column 2 Describe or reference the relevant policy, position, or guidelines.

Column 3 Describe your role with the organization, including your involvement in developing, disseminating, or implementing the relevant policy, position, or guidelines.

Add rows as needed for each organization.

| <i>Organization</i> | <i>Relevant Policy Position</i> | <i>Your Role</i> |
|---------------------|---------------------------------|------------------|
|                     |                                 |                  |

### Clinical Practice

9. Do you see patients clinically?

No

Yes

If yes, what is your primary specialty or subspecialty?

Internal Medicine/Neurology

If yes, do you prescribe or otherwise recommend clinical interventions (e.g., screening or diagnostic tests, evaluations, treatments, procedures) that may be addressed by these guidelines?

No

Yes

If yes, please explain:

It depends on the case scenario and the relevance.

### Other

10. Do you have other nonfinancial interests or relationships not described above that could be relevant to the work of developing these guidelines?

No

Yes

If yes, please describe:

### Expected Interests

11. Do you expect to enter into, within the next 24 months, any new **financial or nonfinancial interests** not described above that could be relevant to the work of developing these guidelines?

No

Yes

If yes, please describe:

## Section 2. Attestation of Compliance With Conflict of Interest Policies

In consideration of my participation on these guidelines, I hereby certify and agree that:

| <i>Policy</i>                                                                                                                                                                                                                                                                                                                                                                                                                                                                                                                                                                                                                                                                                                                                                                                                                                                                                                                                                                                                                                                                                                                                                                                                             | <i>Initials</i> |
|---------------------------------------------------------------------------------------------------------------------------------------------------------------------------------------------------------------------------------------------------------------------------------------------------------------------------------------------------------------------------------------------------------------------------------------------------------------------------------------------------------------------------------------------------------------------------------------------------------------------------------------------------------------------------------------------------------------------------------------------------------------------------------------------------------------------------------------------------------------------------------------------------------------------------------------------------------------------------------------------------------------------------------------------------------------------------------------------------------------------------------------------------------------------------------------------------------------------------|-----------------|
| I have reviewed and understand the ASH Principles and Policies on Conflict of Interest published on the ASH website at <a href="https://www.hematology.org/about/governance/conflict-of-interest">https://www.hematology.org/about/governance/conflict-of-interest</a> including the special Policy on Management of Conflicts in the Development of Clinical Practice Guidelines (“ASH Policy”).                                                                                                                                                                                                                                                                                                                                                                                                                                                                                                                                                                                                                                                                                                                                                                                                                         | RM              |
| I have disclosed and will continue to disclose completely all potential conflicts of interest for myself and for my partner or spouse, to the best of my ability and knowledge, in accordance with ASH Policy and this Disclosure Form.                                                                                                                                                                                                                                                                                                                                                                                                                                                                                                                                                                                                                                                                                                                                                                                                                                                                                                                                                                                   | RM              |
| To ensure completeness and avoid discrepancies, I have checked and periodically will check my financial disclosures against other published information, including from the U.S. Centers for Medicare and Medicaid Services’ Open Payments database (or similar non-U.S. database) and explain any discrepant information.                                                                                                                                                                                                                                                                                                                                                                                                                                                                                                                                                                                                                                                                                                                                                                                                                                                                                                | RM              |
| <p>Until submission of the guidelines for publication, I understand and agree that without special exception from ASH, any of the following will disqualify me from continued participation and I will not enter into:</p> <ul style="list-style-type: none"> <li>• Any <b>direct financial interest</b> of myself or my partner or spouse in any <b>for-profit healthcare company or companies</b>, if such interests in aggregate may be reasonably valued to be &gt;\$5,000/year, regardless of relevance to the guidelines</li> <li>• Any noneducational speaking by myself on behalf of any <b>for-profit healthcare company</b> (e.g., service on a company “speakers bureau”), regardless of relevance to the guidelines</li> <li>• Consulting or advising about the marketing of products by any <b>for-profit healthcare company</b> (e.g., service on a company “advisory board”), regardless of relevance to the guidelines</li> <li>• Simultaneous participation on guidelines by another organization on the same topic</li> <li>• Any <i>undisclosed</i> financial interest in any <b>for-profit healthcare company</b> occurring in the 24 months prior to my participation on these guidelines</li> </ul> | RM              |
| I understand that if a disqualifying interest is reported, the usual course of action will be dismissal from participation and acknowledgment within the guideline publication rather than authorship.                                                                                                                                                                                                                                                                                                                                                                                                                                                                                                                                                                                                                                                                                                                                                                                                                                                                                                                                                                                                                    | RM              |
| At regular intervals during the guideline development process, as determined by ASH, I will review my information in this Disclosure Form; provide updated disclosures; and, if requested, attest that I do not have any interests that should disqualify my participation.                                                                                                                                                                                                                                                                                                                                                                                                                                                                                                                                                                                                                                                                                                                                                                                                                                                                                                                                               | RM              |

| <i>Policy</i>                                                                                                                                                                                                               | <i>Initials</i> |
|-----------------------------------------------------------------------------------------------------------------------------------------------------------------------------------------------------------------------------|-----------------|
| I agree to publish with the guidelines my complete disclosures, this agreement, and future attestations.                                                                                                                    | RM              |
| I understand that for 1 year following initial publication of the guidelines, I am encouraged by ASH to avoid new conflicts of interest that could reduce trust in the guidelines, in accordance with my own best judgment. | RM              |

Agreed by

Rami Z. Morsi

Date

08/27/2020

### Section 3. ASH Review Prior to Participation

For ASH Internal Use Only

| <i>Name, Role</i>                                                     | <i>Date</i>     | <i>Management Notes</i> |
|-----------------------------------------------------------------------|-----------------|-------------------------|
| Eddrika Russell, ASH Staff                                            | August 31, 2020 |                         |
| Menaka Pai, MD, Ex Officio ASH<br>Guideline Oversight<br>Subcommittee | August 31, 2020 | Participation approved  |

## Section 4. Disclosures and Attestations During Participation

For ASH Internal Use Only

| <i>Disclosure or attestation</i> | <i>Date</i>      | <i>Reviewed by</i>     | <i>Management Notes</i>                                           |
|----------------------------------|------------------|------------------------|-------------------------------------------------------------------|
| Attestation                      | June 30, 2021    | Russell                | Dr. Morsi agreed to adhere to the policies described herein.      |
| Attestation                      | October 3, 2021  | Russell                | Dr. Morsi agreed to adhere to the policies described herein.      |
| Attestation                      | January 18, 2022 | Deion Smith, ASH Staff | Dr. Morsi agreed to adhere to the policies described herein.      |
|                                  | March 31, 2022   | Smith                  | Dr. Morsi confirmed that all information in this form is correct. |

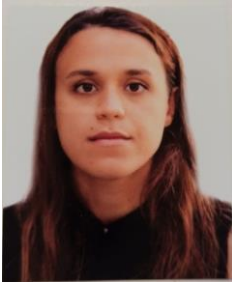

## Giovanna Elsa Ute Muti Schünemann, MD, MSc

HRM MSc Student

McMaster University

Hamilton, Ontario, Canada

---

### Project

ASH Clinical Practice Guidelines on Anticoagulation in Patients with COVID-19

### Role

Review Team Member

### Profile

Dr. Giovanna Elsa Ute Muti Schünemann recently graduated from “San Raffaele University” international medical school in Milan, Italy. She concluded her studies under the supervision of Prof. Maurilio Ponzoni in the field of Hematopathology.

She has started her MSc in Health Research Methodology at McMaster University under the supervision of Dr. Mark Crowther. Giovanna participated in different projects including systematic reviews dealing with physical distancing and preventive measures for person-to-person transmission of SARS-CoV-2, Ventilation techniques and risk for transmission of coronavirus disease including COVID-19, safe management of bodies of deceased persons with suspected or confirmed COVID-19 and the development of International guidelines on VTE prophylaxis in post-thoracic surgery patients.

[July 18, 2020 profile approved by Dr. Schünemann. April 7, 2022 profile updated by Dr. Schünemann]

## Section 1. Disclosures Prior to Participation

### Definitions

|                                             |                                                                                                                                                                                                                                                                                                                                                                                                                                                                                                                                                                                                                                                             |
|---------------------------------------------|-------------------------------------------------------------------------------------------------------------------------------------------------------------------------------------------------------------------------------------------------------------------------------------------------------------------------------------------------------------------------------------------------------------------------------------------------------------------------------------------------------------------------------------------------------------------------------------------------------------------------------------------------------------|
| <b><i>Conflict of interest</i></b>          | A situation in which a reasonable person would consider that an individual’s judgments or actions regarding any aspect of the guideline development process is, or could be perceived to be, influenced by an outside interest                                                                                                                                                                                                                                                                                                                                                                                                                              |
| <b><i>Financial interest</i></b>            | A position or relationship held by an individual that offers potential gain or loss of monetary value, such as employment, stock ownership, payment for services, or gifts given with the expectation of reciprocity                                                                                                                                                                                                                                                                                                                                                                                                                                        |
| <b><i>Direct financial interest</i></b>     | A financial interest that is owned by the individual or received directly by the individual                                                                                                                                                                                                                                                                                                                                                                                                                                                                                                                                                                 |
| <b><i>Indirect financial interest</i></b>   | A financial interest that is owned or received via an intermediary, e.g., research funding to an individual received through the individual’s academic institution                                                                                                                                                                                                                                                                                                                                                                                                                                                                                          |
| <b><i>For-profit healthcare company</i></b> | “A for-profit entity that develops, produces, markets, or distributes drugs, devices, services, or therapies used to diagnose, treat, monitor, manage, and alleviate health conditions. This definition is not intended to include non-profit entities, entities outside of the healthcare sector, or entities through which physicians provide clinical services directly to patients” (Council of Medical Specialty Societies’ “Code for Interactions With Industry” 2015). This definition is furthermore not viewed by ASH to include companies that provide accredited continuing medical education or that publish scientific or educational content. |

### Part A. Direct Financial Interests

#### Employment With For-Profit Healthcare Companies

1. Are you currently or in the past 24 months have you been an employee of any **for-profit healthcare company**?

No

Yes, as described below:

Add rows as needed for each employment relationship.

| <i>Company</i> | <i>Description</i> | <i>End Date</i> | <i>For ASH Internal Use</i> |
|----------------|--------------------|-----------------|-----------------------------|
|                |                    |                 |                             |



### Equity in For-Profit Healthcare Companies

2. Do you currently or in the past 24 months have you had equity in any **for-profit healthcare company**? Equity includes stock, stock options, and other ownership interests but excludes diversified mutual fund shares.

No

Yes, as described below:

Add rows as needed for each equity interest.

| <i>Company</i> | <i>Description</i> | <i>Date Divested</i> | <i>For ASH Internal Use</i> |
|----------------|--------------------|----------------------|-----------------------------|
|                |                    |                      |                             |

### Healthcare-Related Patents, Royalties, and Other Intellectual Property

3. Do you currently or in the past 24 months have you owned patents for or received royalties from any intellectual property or product used to diagnose, treat, monitor, manage, or alleviate health conditions?

No

Yes, as described below:

Add rows as needed for each patent or royalty interest.

| <i>Company</i> | <i>Description</i> | <i>Date Divested</i> | <i>For ASH Internal Use</i> |
|----------------|--------------------|----------------------|-----------------------------|
|                |                    |                      |                             |

### Personal Income or Other Direct Transfers of Value From For-Profit Healthcare Companies

4. Do you currently or in the past 24 months have you received any personal income or other direct transfers of value (e.g., honoraria, gifts, travel support, meeting registration, meals) from any **for-profit healthcare company**?

No

Yes, as described below:

Column 1 Name the company.

Column 2 Describe the activity for which you received the income or other transfer of value, e.g., research, consultancy, speakers bureau involvement, service on an advisory committee or board, expert testimony.

Column 3 Indicate when the activity ended, if applicable. (If the activity has not yet ended, indicate “current” or “ongoing.”)

Add rows as needed for each activity.

| <i>Company</i> | <i>Description</i> | <i>End Date</i> | <i>For ASH Internal Use</i> |
|----------------|--------------------|-----------------|-----------------------------|
|                |                    |                 |                             |

#### My Partner’s or Spouse’s Interests

5. Currently or in the past 24 months has *your partner or spouse* had any of the interests or relationships described in questions 1-4?

No

Yes, as described below:

Add rows as needed for each interest.

| <i>Company</i> | <i>Description</i> | <i>End Date</i> | <i>For ASH Internal Use</i> |
|----------------|--------------------|-----------------|-----------------------------|
|                |                    |                 |                             |

#### Other Relevant Direct Financial Interests

6. Do you have other current or recent (within the past 24 months) **direct financial interests** with any institution, organization, entity or individual that could be relevant to the work of developing these guidelines?

No

Yes

If yes, please explain:

## Part B. Indirect Financial Interests

### Institutional Research Funded by For-Profit Healthcare Companies

1. Through your institution, do you currently or in the past 24 months have you been involved in research funded or supported (e.g., in kind support, such as provision of a study drug) by any **for-profit healthcare company**?

No

Yes, as described below:

Column 1 Name the company funding or supporting the research.

Column 2 Briefly describe the research project.

Column 3 Describe your role: (a) national or overall principal investigator, (b) member of a steering committee of a study that does not have a principal investigator, (c) site or local investigator. If other than these options, please describe.

Column 4 Indicate when your involvement ended, if applicable. (If your involvement has not yet ended, indicate “current” or “ongoing.”)

Add rows as needed for each research project.

| <i>Company</i> | <i>Description of Research</i> | <i>My Role</i> | <i>End Date</i> | <i>For ASH Internal Use</i> |
|----------------|--------------------------------|----------------|-----------------|-----------------------------|
|                |                                |                |                 |                             |

### Paid and Volunteer Activities for Organizations Supported by For-Profit Healthcare Companies

2. Do you currently or in the past 24 months have you been involved in any volunteer or paid work for an organization that is wholly or partially funded by any **for-profit healthcare company**?

No

Yes, as described below:

Column 1 Name the organization. If known to you, describe any industry funding or support.

Column 2 Briefly describe your activity and role, e.g., employment, service on board of directors, other volunteer services.

Column 3 Indicate if your activity was paid or volunteered.

Column 4 Indicate when your involvement with the organization ended. (If your involvement has not yet ended, indicate “current” or “ongoing.”)

Add rows as needed for each organization.

| <i>Organization</i> | <i>Description and role</i> | <i>Paid or Unpaid?</i> | <i>End Date</i> | <i>For ASH Internal Use</i> |
|---------------------|-----------------------------|------------------------|-----------------|-----------------------------|
|                     |                             |                        |                 |                             |

Other Relevant Indirect Financial Interests

3. Do you have other **indirect financial interests** with any: (i) **for-profit healthcare** company; or (ii) other institution, organization, entity or individual that could be relevant to the work of developing these guidelines?

No

Yes

If yes, please explain:

## Part C. Relevant Other Interests That Are Not Mainly Financial

### Personal Beliefs

1. Do you have strongly held beliefs related to the topic of these guidelines?

No

Yes

If yes, please explain:

### Previously Published Opinions

2. Have you ever authored, coauthored, or publicly provided an opinion related to the topic of these guidelines, e.g., a clinical practice guideline, textbook, review article, meeting poster or presentation, grand rounds talk, letter to the editor?

No

Yes

If yes, what were those views and where were they made?

### Non-Industry Supported Research

3. Currently or in the past 24 months, have you been involved in a leadership role in any research project not already reported under Part B, Question 1, relevant to the topic of these guidelines, e.g., a research project funded by a nonprofit or governmental organization?

No

Yes, as described below:

Column 1 Name the entity funding the research.

Column 2 Describe the research project.

Column 3 Describe your role: (a) national or overall principal investigator, (b) member of a steering committee of a study that does not have a principal investigator, (c) site or local investigator. If other than these options, please describe.

Column 4 Indicate when your involvement ended, if applicable. (If your involvement has not yet ended, indicate "current" or "ongoing.")

Add rows as needed for each research project.

| <i>Funder</i> | <i>Description of Research</i> | <i>My Role</i> | <i>End Date</i> |
|---------------|--------------------------------|----------------|-----------------|
|               |                                |                |                 |

### Institutional Relationships

4. Could your compensation be affected by recommendations on this topic?

Don't know

No

Yes

If yes, please explain:

5. Do you generate revenues for your institution or employer by clinical activity, teaching, speaking, consulting, testifying, writing, or otherwise sharing your knowledge or opinions about this guideline topic?

Don't know

No

Yes

If yes, please explain:

6. Could your institution benefit or be harmed by guidelines on this topic?

Don't know

No

Yes

If yes, please explain:

### Career Advancement

7. How would you characterize the support you would receive from your primary mentor, institution, or other entities if your work on this panel or authorship of these guidelines generated a strong reaction from peers outside your institution?

Likely positive

### Involvement in Organizations With Relevant Policies, Positions, or Guidelines

8. Are you involved as an employee, volunteer, or member of any organization that has published or to your knowledge is currently developing policies, positions, or guidelines relevant to these ASH

guidelines, e.g., clinical practice guidelines, appropriate use criteria, expert consensus statement, mission statement, advocacy statement, amicus brief, or legislature or legal testimony?

No

Yes, as described below:

Column 1 Name the organization.

Column 2 Describe or reference the relevant policy, position, or guidelines.

Column 3 Describe your role with the organization, including your involvement in developing, disseminating, or implementing the relevant policy, position, or guidelines.

Add rows as needed for each organization.

| <i>Organization</i> | <i>Relevant Policy Position</i>                                                                                                                  | <i>Your Role</i>                        |
|---------------------|--------------------------------------------------------------------------------------------------------------------------------------------------|-----------------------------------------|
| McMaster University | Systematic review and meta-analysis on physical distancing, face masks and eye protection to prevent person-to-person transmission of SARS-CoV-2 | Volunteer screening and data extraction |
| McMaster University | Living systematic review on Ventilation techniques and risk for transmission of coronavirus disease, including COVID-19                          | Volunteer screening and data extraction |
| McMaster University | Rapid systematic review of the literature on safe management of bodies of deceased persons with suspected or confirmed COVID19                   | Volunteer screening and data extraction |

#### Clinical Practice

9. Do you see patients clinically?

No

Yes

If yes, what is your primary specialty or subspecialty?

If yes, do you prescribe or otherwise recommend clinical interventions (e.g., screening or diagnostic tests, evaluations, treatments, procedures) that may be addressed by these guidelines?

No

Yes

If yes, please explain:

#### Other

10. Do you have other nonfinancial interests or relationships not described above that could be relevant to the work of developing these guidelines?

No

Yes

If yes, please describe:

#### Expected Interests

11. Do you expect to enter into, within the next 24 months, any new **financial or nonfinancial interests** not described above that could be relevant to the work of developing these guidelines?

No

Yes

If yes, please describe:



## Section 2. Attestation of Compliance With Conflict of Interest Policies

In consideration of my participation on these guidelines, I hereby certify and agree that:

| <i>Policy</i>                                                                                                                                                                                                                                                                                                                                                                                                                                                                                                                                                                                                                                                                                                                                                                                                                                                                                                                                                                                                                                                                                                                                                                                                             | <i>Initials</i> |
|---------------------------------------------------------------------------------------------------------------------------------------------------------------------------------------------------------------------------------------------------------------------------------------------------------------------------------------------------------------------------------------------------------------------------------------------------------------------------------------------------------------------------------------------------------------------------------------------------------------------------------------------------------------------------------------------------------------------------------------------------------------------------------------------------------------------------------------------------------------------------------------------------------------------------------------------------------------------------------------------------------------------------------------------------------------------------------------------------------------------------------------------------------------------------------------------------------------------------|-----------------|
| I have reviewed and understand the ASH Principles and Policies on Conflict of Interest published on the ASH website at <a href="https://www.hematology.org/about/governance/conflict-of-interest">https://www.hematology.org/about/governance/conflict-of-interest</a> including the special Policy on Management of Conflicts in the Development of Clinical Practice Guidelines (“ASH Policy”).                                                                                                                                                                                                                                                                                                                                                                                                                                                                                                                                                                                                                                                                                                                                                                                                                         | GEUMS           |
| I have disclosed and will continue to disclose completely all potential conflicts of interest for myself and for my partner or spouse, to the best of my ability and knowledge, in accordance with ASH Policy and this Disclosure Form.                                                                                                                                                                                                                                                                                                                                                                                                                                                                                                                                                                                                                                                                                                                                                                                                                                                                                                                                                                                   | GEUMS           |
| To ensure completeness and avoid discrepancies, I have checked and periodically will check my financial disclosures against other published information, including from the U.S. Centers for Medicare and Medicaid Services’ Open Payments database (or similar non-U.S. database) and explain any discrepant information.                                                                                                                                                                                                                                                                                                                                                                                                                                                                                                                                                                                                                                                                                                                                                                                                                                                                                                | GEUMS           |
| <p>Until submission of the guidelines for publication, I understand and agree that without special exception from ASH, any of the following will disqualify me from continued participation and I will not enter into:</p> <ul style="list-style-type: none"> <li>• Any <b>direct financial interest</b> of myself or my partner or spouse in any <b>for-profit healthcare company or companies</b>, if such interests in aggregate may be reasonably valued to be &gt;\$5,000/year, regardless of relevance to the guidelines</li> <li>• Any noneducational speaking by myself on behalf of any <b>for-profit healthcare company</b> (e.g., service on a company “speakers bureau”), regardless of relevance to the guidelines</li> <li>• Consulting or advising about the marketing of products by any <b>for-profit healthcare company</b> (e.g., service on a company “advisory board”), regardless of relevance to the guidelines</li> <li>• Simultaneous participation on guidelines by another organization on the same topic</li> <li>• Any <i>undisclosed</i> financial interest in any <b>for-profit healthcare company</b> occurring in the 24 months prior to my participation on these guidelines</li> </ul> | GEUMS           |
| I understand that if a disqualifying interest is reported, the usual course of action will be dismissal from participation and acknowledgment within the guideline publication rather than authorship.                                                                                                                                                                                                                                                                                                                                                                                                                                                                                                                                                                                                                                                                                                                                                                                                                                                                                                                                                                                                                    | GEUMS           |
| At regular intervals during the guideline development process, as determined by ASH, I will review my information in this Disclosure Form; provide updated disclosures; and, if requested, attest that I do not have any interests that should disqualify my participation.                                                                                                                                                                                                                                                                                                                                                                                                                                                                                                                                                                                                                                                                                                                                                                                                                                                                                                                                               | GEUMS           |

|                                                                                                                                                                                                                             |       |
|-----------------------------------------------------------------------------------------------------------------------------------------------------------------------------------------------------------------------------|-------|
| I agree to publish with the guidelines my complete disclosures, this agreement, and future attestations.                                                                                                                    | GEUMS |
| I understand that for 1 year following initial publication of the guidelines, I am encouraged by ASH to avoid new conflicts of interest that could reduce trust in the guidelines, in accordance with my own best judgment. | GEUMS |

Agreed by

Giovanna Elsa Ute Muti Schuenemann

Date

29/06/2020

### Section 3. ASH Review Prior to Participation

For ASH Internal Use Only

| <i>Name, Role</i>                                                     | <i>Date</i>   | <i>Management Notes</i> |
|-----------------------------------------------------------------------|---------------|-------------------------|
| Eddrika Russell, ASH Staff                                            | June 29, 2020 |                         |
| Menaka Pai, MD, Ex Officio ASH<br>Guideline Oversight<br>Subcommittee | July 15, 2020 | Participation approved  |

## Section 4. Disclosures and Attestations During Participation

For ASH Internal Use Only

| <i>Disclosure or attestation</i> | <i>Date</i>      | <i>Reviewed by</i>     | <i>Management Notes</i>                                               |
|----------------------------------|------------------|------------------------|-----------------------------------------------------------------------|
| Attestation                      | June 29, 2021    | Russell                | Dr. Schünemann agreed to adhere to the policies described herein.     |
| Attestation                      | October 6, 2021  | Russell                | Dr. Schünemann agreed to adhere to the policies described herein.     |
| Attestation                      | January 18, 2021 | Deion Smith, ASH Staff | Dr. Schünemann agreed to adhere to the policies described herein.     |
|                                  | April 5, 2022    | Smith                  | Dr. Schünemann confirmed that all information in the form is correct. |

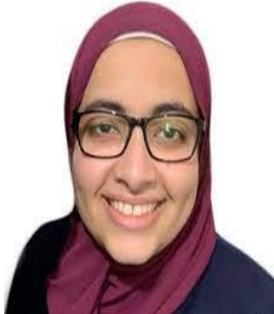

## Menatalla K. Nadim, MBBCh

Resident Physician

Department of Clinical Pathology, Faculty of Medicine, Ain Shams University

Cairo, Egypt

---

### Project

ASH Clinical Practice Guidelines on Anticoagulation in Patients with COVID-19

### Role

Review Team Member

### Profile

Ms. Nadim's journey started when she graduated from School of Medicine at Ain Shams University, Egypt. She discovered her passion in Hematology and specialized in Clinical Pathology which incorporates Hematopathology practice at my university hospital. It also includes immunology, microbiology and clinical chemistry with all their diagnostic practices. She underwent research training and took part in "NuCLS", a breast cancer pathology image analysis research project. Ms. Nadim developed an interest in programming languages including R and Python. In Fall 2021, she will be starting a Master of science in Biomedical diagnostics at Arizona state University.

[May 19, 2021 profile approved by Ms. Nadim]

## Section 1. Disclosures Prior to Participation

### Definitions

**Conflict of interest**

A situation in which a reasonable person would consider that an individual’s judgments or actions regarding any aspect of the guideline development process is, or could be perceived to be, influenced by an outside interest

**Financial interest**

A position or relationship held by an individual that offers potential gain or loss of monetary value, such as employment, stock ownership, payment for services, or gifts given with the expectation of reciprocity

**Direct financial interest**

A financial interest that is owned by the individual or received directly by the individual

**Indirect financial interest**

A financial interest that is owned or received via an intermediary, e.g., research funding to an individual received through the individual’s academic institution

**For-profit healthcare company**

“A for-profit entity that develops, produces, markets, or distributes drugs, devices, services, or therapies used to diagnose, treat, monitor, manage, and alleviate health conditions. This definition is not intended to include non-profit entities, entities outside of the healthcare sector, or entities through which physicians provide clinical services directly to patients” (Council of Medical Specialty Societies’ “Code for Interactions With Industry” 2015). This definition is furthermore not viewed by ASH to include companies that provide accredited continuing medical education or that publish scientific or educational content.

### Part A. Direct Financial Interests

#### Employment With For-Profit Healthcare Companies

1. Are you currently or in the past 24 months have you been an employee of any **for-profit healthcare company**?

No

Yes, as described below:

Add rows as needed for each employment relationship.

| <i>Company</i> | <i>Description</i> | <i>End Date</i> | <i>For ASH Internal Use</i> |
|----------------|--------------------|-----------------|-----------------------------|
|                |                    |                 |                             |

### Equity in For-Profit Healthcare Companies

2. Do you currently or in the past 24 months have you had equity in any **for-profit healthcare company**? Equity includes stock, stock options, and other ownership interests but excludes diversified mutual fund shares.

No

Yes, as described below:

Add rows as needed for each equity interest.

| <i>Company</i> | <i>Description</i> | <i>Date Divested</i> | <i>For ASH Internal Use</i> |
|----------------|--------------------|----------------------|-----------------------------|
|                |                    |                      |                             |

### Healthcare-Related Patents, Royalties, and Other Intellectual Property

3. Do you currently or in the past 24 months have you owned patents for or received royalties from any intellectual property or product used to diagnose, treat, monitor, manage, or alleviate health conditions?

No

Yes, as described below:

Add rows as needed for each patent or royalty interest.

| <i>Company</i> | <i>Description</i> | <i>Date Divested</i> | <i>For ASH Internal Use</i> |
|----------------|--------------------|----------------------|-----------------------------|
|                |                    |                      |                             |

### Personal Income or Other Direct Transfers of Value From For-Profit Healthcare Companies

4. Do you currently or in the past 24 months have you received any personal income or other direct transfers of value (e.g., honoraria, gifts, travel support, meeting registration, meals) from any **for-profit healthcare company**?

No

Yes, as described below:

Column 1 Name the company.

Column 2 Describe the activity for which you received the income or other transfer of value, e.g., research, consultancy, speakers bureau involvement, service on an advisory committee or board, expert testimony.

Column 3 Indicate when the activity ended, if applicable. (If the activity has not yet ended, indicate "current" or "ongoing.")

Add rows as needed for each activity.

| <i>Company</i> | <i>Description</i> | <i>End Date</i> | <i>For ASH Internal Use</i> |
|----------------|--------------------|-----------------|-----------------------------|
|                |                    |                 |                             |

#### My Partner's or Spouse's Interests

5. Currently or in the past 24 months has *your partner or spouse* had any of the interests or relationships described in questions 1-4?

No

Yes, as described below:

Add rows as needed for each interest.

| <i>Company</i> | <i>Description</i> | <i>End Date</i> | <i>For ASH Internal Use</i> |
|----------------|--------------------|-----------------|-----------------------------|
|                |                    |                 |                             |

#### Other Relevant Direct Financial Interests

6. Do you have other current or recent (within the past 24 months) **direct financial interests** with any institution, organization, entity or individual that could be relevant to the work of developing these guidelines?

No

Yes

If yes, please explain:



## Part B. Indirect Financial Interests

### Institutional Research Funded by For-Profit Healthcare Companies

1. Through your institution, do you currently or in the past 24 months have you been involved in research funded or supported (e.g., in kind support, such as provision of a study drug) by any **for-profit healthcare company**?

No

Yes, as described below:

Column 1 Name the company funding or supporting the research.

Column 2 Briefly describe the research project.

Column 3 Describe your role: (a) national or overall principal investigator, (b) member of a steering committee of a study that does not have a principal investigator, (c) site or local investigator. If other than these options, please describe.

Column 4 Indicate when your involvement ended, if applicable. (If your involvement has not yet ended, indicate “current” or “ongoing.”)

Add rows as needed for each research project.

| <i>Company</i> | <i>Description of Research</i> | <i>My Role</i> | <i>End Date</i> | <i>For ASH Internal Use</i> |
|----------------|--------------------------------|----------------|-----------------|-----------------------------|
|                |                                |                |                 |                             |

### Paid and Volunteer Activities for Organizations Supported by For-Profit Healthcare Companies

2. Do you currently or in the past 24 months have you been involved in any volunteer or paid work for an organization that is wholly or partially funded by any **for-profit healthcare company**?

No

Yes, as described below:

Column 1 Name the organization. If known to you, describe any industry funding or support.

Column 2 Briefly describe your activity and role, e.g., employment, service on board of directors, other volunteer services.

Column 3 Indicate if your activity was paid or volunteered.

Column 4 Indicate when your involvement with the organization ended. (If your involvement has not yet ended, indicate “current” or “ongoing.”)

Add rows as needed for each organization.

| <i>Organization</i> | <i>Description and role</i> | <i>Paid or Unpaid?</i> | <i>End Date</i> | <i>For ASH Internal Use</i> |
|---------------------|-----------------------------|------------------------|-----------------|-----------------------------|
|                     |                             |                        |                 |                             |

Other Relevant Indirect Financial Interests

3. Do you have other **indirect financial interests** with any: (i) **for-profit healthcare** company; or (ii) other institution, organization, entity or individual that could be relevant to the work of developing these guidelines?

No

Yes

If yes, please explain:

## Part C. Relevant Other Interests That Are Not Mainly Financial

### Personal Beliefs

1. Do you have strongly held beliefs related to the topic of these guidelines?

No

Yes

If yes, please explain:

### Previously Published Opinions

2. Have you ever authored, coauthored, or publicly provided an opinion related to the topic of these guidelines, e.g., a clinical practice guideline, textbook, review article, meeting poster or presentation, grand rounds talk, letter to the editor?

No

Yes

If yes, what were those views and where were they made?

### Non-Industry Supported Research

3. Currently or in the past 24 months, have you been involved in a leadership role in any research project not already reported under Part B, Question 1, relevant to the topic of these guidelines, e.g., a research project funded by a nonprofit or governmental organization?

No

Yes, as described below:

Column 1 Name the entity funding the research.

Column 2 Describe the research project.

Column 3 Describe your role: (a) national or overall principal investigator, (b) member of a steering committee of a study that does not have a principal investigator, (c) site or local investigator. If other than these options, please describe.

Column 4 Indicate when your involvement ended, if applicable. (If your involvement has not yet ended, indicate "current" or "ongoing.")

Add rows as needed for each research project.

| <i>Funder</i> | <i>Description of Research</i> | <i>My Role</i> | <i>End Date</i> |
|---------------|--------------------------------|----------------|-----------------|
|               |                                |                |                 |

### Institutional Relationships

4. Could your compensation be affected by recommendations on this topic?

Don't know

No

Yes

If yes, please explain:

5. Do you generate revenues for your institution or employer by clinical activity, teaching, speaking, consulting, testifying, writing, or otherwise sharing your knowledge or opinions about this guideline topic?

Don't know

No

Yes

If yes, please explain:

6. Could your institution benefit or be harmed by guidelines on this topic?

Don't know

No

Yes

If yes, please explain:

### Career Advancement

7. How would you characterize the support you would receive from your primary mentor, institution, or other entities if your work on this panel or authorship of these guidelines generated a strong reaction from peers outside your institution?

It will have no effect

### Involvement in Organizations With Relevant Policies, Positions, or Guidelines

8. Are you involved as an employee, volunteer, or member of any organization that has published or to your knowledge is currently developing policies, positions, or guidelines relevant to these ASH

guidelines, e.g., clinical practice guidelines, appropriate use criteria, expert consensus statement, mission statement, advocacy statement, amicus brief, or legislature or legal testimony?

No

Yes, as described below:

Column 1 Name the organization.

Column 2 Describe or reference the relevant policy, position, or guidelines.

Column 3 Describe your role with the organization, including your involvement in developing, disseminating, or implementing the relevant policy, position, or guidelines.

Add rows as needed for each organization.

| <i>Organization</i> | <i>Relevant Policy Position</i> | <i>Your Role</i> |
|---------------------|---------------------------------|------------------|
|                     |                                 |                  |

#### Clinical Practice

9. Do you see patients clinically?

No

Yes

If yes, what is your primary specialty or subspecialty?

If yes, do you prescribe or otherwise recommend clinical interventions (e.g., screening or diagnostic tests, evaluations, treatments, procedures) that may be addressed by these guidelines?

No

Yes

If yes, please explain:

#### Other

10. Do you have other nonfinancial interests or relationships not described above that could be relevant to the work of developing these guidelines?

No

Yes

If yes, please describe:

#### Expected Interests

11. Do you expect to enter into, within the next 24 months, any new **financial or nonfinancial interests** not described above that could be relevant to the work of developing these guidelines?

No

Yes

If yes, please describe:

## Section 2. Attestation of Compliance With Conflict of Interest Policies

In consideration of my participation on these guidelines, I hereby certify and agree that:

| <i>Policy</i>                                                                                                                                                                                                                                                                                                                                                                                                                                                                                                                                                                                                                                                                                                                                                                                                                                                                                                                                                                                                                                                                                                                                                                                                             | <i>Initials</i> |
|---------------------------------------------------------------------------------------------------------------------------------------------------------------------------------------------------------------------------------------------------------------------------------------------------------------------------------------------------------------------------------------------------------------------------------------------------------------------------------------------------------------------------------------------------------------------------------------------------------------------------------------------------------------------------------------------------------------------------------------------------------------------------------------------------------------------------------------------------------------------------------------------------------------------------------------------------------------------------------------------------------------------------------------------------------------------------------------------------------------------------------------------------------------------------------------------------------------------------|-----------------|
| I have reviewed and understand the ASH Principles and Policies on Conflict of Interest published on the ASH website at <a href="https://www.hematology.org/about/governance/conflict-of-interest">https://www.hematology.org/about/governance/conflict-of-interest</a> including the special Policy on Management of Conflicts in the Development of Clinical Practice Guidelines (“ASH Policy”).                                                                                                                                                                                                                                                                                                                                                                                                                                                                                                                                                                                                                                                                                                                                                                                                                         | M.K.N.          |
| I have disclosed and will continue to disclose completely all potential conflicts of interest for myself and for my partner or spouse, to the best of my ability and knowledge, in accordance with ASH Policy and this Disclosure Form.                                                                                                                                                                                                                                                                                                                                                                                                                                                                                                                                                                                                                                                                                                                                                                                                                                                                                                                                                                                   | M.K.N.          |
| To ensure completeness and avoid discrepancies, I have checked and periodically will check my financial disclosures against other published information, including from the U.S. Centers for Medicare and Medicaid Services’ Open Payments database (or similar non-U.S. database) and explain any discrepant information.                                                                                                                                                                                                                                                                                                                                                                                                                                                                                                                                                                                                                                                                                                                                                                                                                                                                                                | M.K.N.          |
| <p>Until submission of the guidelines for publication, I understand and agree that without special exception from ASH, any of the following will disqualify me from continued participation and I will not enter into:</p> <ul style="list-style-type: none"> <li>• Any <b>direct financial interest</b> of myself or my partner or spouse in any <b>for-profit healthcare company or companies</b>, if such interests in aggregate may be reasonably valued to be &gt;\$5,000/year, regardless of relevance to the guidelines</li> <li>• Any noneducational speaking by myself on behalf of any <b>for-profit healthcare company</b> (e.g., service on a company “speakers bureau”), regardless of relevance to the guidelines</li> <li>• Consulting or advising about the marketing of products by any <b>for-profit healthcare company</b> (e.g., service on a company “advisory board”), regardless of relevance to the guidelines</li> <li>• Simultaneous participation on guidelines by another organization on the same topic</li> <li>• Any <i>undisclosed</i> financial interest in any <b>for-profit healthcare company</b> occurring in the 24 months prior to my participation on these guidelines</li> </ul> | M.K.N.          |
| I understand that if a disqualifying interest is reported, the usual course of action will be dismissal from participation and acknowledgment within the guideline publication rather than authorship.                                                                                                                                                                                                                                                                                                                                                                                                                                                                                                                                                                                                                                                                                                                                                                                                                                                                                                                                                                                                                    | M.K.N.          |
| At regular intervals during the guideline development process, as determined by ASH, I will review my information in this Disclosure Form; provide updated disclosures; and, if requested, attest that I do not have any interests that should disqualify my participation.                                                                                                                                                                                                                                                                                                                                                                                                                                                                                                                                                                                                                                                                                                                                                                                                                                                                                                                                               | M.K.N.          |

|                                                                                                                                                                                                                             |        |
|-----------------------------------------------------------------------------------------------------------------------------------------------------------------------------------------------------------------------------|--------|
| I agree to publish with the guidelines my complete disclosures, this agreement, and future attestations.                                                                                                                    | M.K.N. |
| I understand that for 1 year following initial publication of the guidelines, I am encouraged by ASH to avoid new conflicts of interest that could reduce trust in the guidelines, in accordance with my own best judgment. | M.K.N. |

Agreed by

Menatalla Nadim

Date

April 2, 2021



### Section 3. ASH Review Prior to Participation

For ASH Internal Use Only

| <i>Name, Role</i>                                                       | <i>Date</i>    | <i>Management Notes</i> |
|-------------------------------------------------------------------------|----------------|-------------------------|
| Eddrika Russell, ASH staff                                              | April 19, 2021 |                         |
| Dee Terrell, PhD, Ex Officio ASH<br>Guideline Oversight<br>Subcommittee | April 19, 2021 | Participation approved  |

## Section 4. Disclosures and Attestations During Participation

For ASH Internal Use Only

| <i>Disclosure or attestation</i> | <i>Date</i>      | <i>Reviewed by</i>     | <i>Management Notes</i>                                           |
|----------------------------------|------------------|------------------------|-------------------------------------------------------------------|
| Attestation                      | June 30, 2021    | Russell                | Dr. Nadim agreed to adhere to the policies described herein.      |
| Attestation                      | October 5, 2021  | Russell                | Dr. Nadim agreed to adhere to the policies described herein.      |
| Attestation                      | January 19, 2022 | Deion Smith, ASH Staff | Dr. Nadim agreed to adhere to the policies described herein.      |
|                                  | April 4, 2022    | Smith                  | Dr. Nadim confirmed that all information in this form is correct. |



ASH Clinical Practice Guidelines  
Participant Information

---

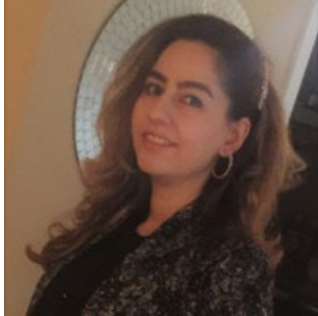

Atefeh Noori, MSc, Ph.D

Ph.D

McMaster University

Hamilton, Ontario, Canada

---

### Project

ASH Clinical Practice Guidelines on Anticoagulation in Patients with COVID-19

### Role

Review Team Member

### Profile

Ms. Atefeh Noori has a clinical background in nursing and graduated with a Master of Science with a concentration in Epidemiology. She recently earned her PhD from the Health Research Methodology program (Clinical Epidemiology stream) in the Faculty of Health Science at McMaster University. She has a strong interest in population-level public health interventions, quantitative analysis, methods in evidence-based medicine, network meta-analysis, and clinical trials. Ms. Noori has been working for more than five years in different research centers and mainly has focused on the systematic review, meta-analysis, population health metrics, and social determinants of health.

[August 6, 2020 profile approved by Ms. Noori]

## Section 1. Disclosures Prior to Participation

### Definitions

|                                      |                                                                                                                                                                                                                                                                                                                                                                                                                                                                                                                                                                                                                                                             |
|--------------------------------------|-------------------------------------------------------------------------------------------------------------------------------------------------------------------------------------------------------------------------------------------------------------------------------------------------------------------------------------------------------------------------------------------------------------------------------------------------------------------------------------------------------------------------------------------------------------------------------------------------------------------------------------------------------------|
| <b>Conflict of interest</b>          | A situation in which a reasonable person would consider that an individual’s judgments or actions regarding any aspect of the guideline development process is, or could be perceived to be, influenced by an outside interest                                                                                                                                                                                                                                                                                                                                                                                                                              |
| <b>Financial interest</b>            | A position or relationship held by an individual that offers potential gain or loss of monetary value, such as employment, stock ownership, payment for services, or gifts given with the expectation of reciprocity                                                                                                                                                                                                                                                                                                                                                                                                                                        |
| <b>Direct financial interest</b>     | A financial interest that is owned by the individual or received directly by the individual                                                                                                                                                                                                                                                                                                                                                                                                                                                                                                                                                                 |
| <b>Indirect financial interest</b>   | A financial interest that is owned or received via an intermediary, e.g., research funding to an individual received through the individual’s academic institution                                                                                                                                                                                                                                                                                                                                                                                                                                                                                          |
| <b>For-profit healthcare company</b> | “A for-profit entity that develops, produces, markets, or distributes drugs, devices, services, or therapies used to diagnose, treat, monitor, manage, and alleviate health conditions. This definition is not intended to include non-profit entities, entities outside of the healthcare sector, or entities through which physicians provide clinical services directly to patients” (Council of Medical Specialty Societies’ “Code for Interactions With Industry” 2015). This definition is furthermore not viewed by ASH to include companies that provide accredited continuing medical education or that publish scientific or educational content. |

### Part A. Direct Financial Interests

#### Employment With For-Profit Healthcare Companies

1. Are you currently or in the past 24 months have you been an employee of any **for-profit healthcare company**?

No

Yes, as described below:

Add rows as needed for each employment relationship.

| <i>Company</i> | <i>Description</i> | <i>End Date</i> | <i>For ASH Internal Use</i> |
|----------------|--------------------|-----------------|-----------------------------|
|                |                    |                 |                             |

### Equity in For-Profit Healthcare Companies

2. Do you currently or in the past 24 months have you had equity in any **for-profit healthcare company**? Equity includes stock, stock options, and other ownership interests but excludes diversified mutual fund shares.

No

Yes, as described below:

Add rows as needed for each equity interest.

| <i>Company</i> | <i>Description</i> | <i>Date Divested</i> | <i>For ASH Internal Use</i> |
|----------------|--------------------|----------------------|-----------------------------|
|                |                    |                      |                             |

### Healthcare-Related Patents, Royalties, and Other Intellectual Property

3. Do you currently or in the past 24 months have you owned patents for or received royalties from any intellectual property or product used to diagnose, treat, monitor, manage, or alleviate health conditions?

No

Yes, as described below:

Add rows as needed for each patent or royalty interest.

| <i>Company</i> | <i>Description</i> | <i>Date Divested</i> | <i>For ASH Internal Use</i> |
|----------------|--------------------|----------------------|-----------------------------|
|                |                    |                      |                             |

### Personal Income or Other Direct Transfers of Value From For-Profit Healthcare Companies

4. Do you currently or in the past 24 months have you received any personal income or other direct transfers of value (e.g., honoraria, gifts, travel support, meeting registration, meals) from any **for-profit healthcare company**?

No

Yes, as described below:

Column 1 Name the company.

Column 2 Describe the activity for which you received the income or other transfer of value, e.g., research, consultancy, speakers bureau involvement, service on an advisory committee or board, expert testimony.

Column 3 Indicate when the activity ended, if applicable. (If the activity has not yet ended, indicate "current" or "ongoing.")

Add rows as needed for each activity.

| <i>Company</i> | <i>Description</i> | <i>End Date</i> | <i>For ASH Internal Use</i> |
|----------------|--------------------|-----------------|-----------------------------|
|                |                    |                 |                             |

#### My Partner's or Spouse's Interests

5. Currently or in the past 24 months has *your partner or spouse* had any of the interests or relationships described in questions 1-4?

No

Yes, as described below:

Add rows as needed for each interest.

| <i>Company</i> | <i>Description</i> | <i>End Date</i> | <i>For ASH Internal Use</i> |
|----------------|--------------------|-----------------|-----------------------------|
|                |                    |                 |                             |

#### Other Relevant Direct Financial Interests

6. Do you have other current or recent (within the past 24 months) **direct financial interests** with any institution, organization, entity or individual that could be relevant to the work of developing these guidelines?

No

Yes

If yes, please explain:

## Part B. Indirect Financial Interests

### Institutional Research Funded by For-Profit Healthcare Companies

1. Through your institution, do you currently or in the past 24 months have you been involved in research funded or supported (e.g., in kind support, such as provision of a study drug) by any **for-profit healthcare company**?

No

Yes, as described below:

Column 1 Name the company funding or supporting the research.

Column 2 Briefly describe the research project.

Column 3 Describe your role: (a) national or overall principal investigator, (b) member of a steering committee of a study that does not have a principal investigator, (c) site or local investigator. If other than these options, please describe.

Column 4 Indicate when your involvement ended, if applicable. (If your involvement has not yet ended, indicate “current” or “ongoing.”)

Add rows as needed for each research project.

| <i>Company</i> | <i>Description of Research</i> | <i>My Role</i> | <i>End Date</i> | <i>For ASH Internal Use</i> |
|----------------|--------------------------------|----------------|-----------------|-----------------------------|
|                |                                |                |                 |                             |

### Paid and Volunteer Activities for Organizations Supported by For-Profit Healthcare Companies

2. Do you currently or in the past 24 months have you been involved in any volunteer or paid work for an organization that is wholly or partially funded by any **for-profit healthcare company**?

No

Yes, as described below:

Column 1 Name the organization. If known to you, describe any industry funding or support.

Column 2 Briefly describe your activity and role, e.g., employment, service on board of directors, other volunteer services.

Column 3 Indicate if your activity was paid or volunteered.

Column 4 Indicate when your involvement with the organization ended. (If your involvement has not yet ended, indicate “current” or “ongoing.”)

Add rows as needed for each organization.

| <i>Organization</i> | <i>Description and role</i> | <i>Paid or Unpaid?</i> | <i>End Date</i> | <i>For ASH Internal Use</i> |
|---------------------|-----------------------------|------------------------|-----------------|-----------------------------|
|                     |                             |                        |                 |                             |

Other Relevant Indirect Financial Interests

3. Do you have other **indirect financial interests** with any: (i) **for-profit healthcare** company; or (ii) other institution, organization, entity or individual that could be relevant to the work of developing these guidelines?

No

Yes

If yes, please explain:



## Part C. Relevant Other Interests That Are Not Mainly Financial

### Personal Beliefs

1. Do you have strongly held beliefs related to the topic of these guidelines?

No

Yes

If yes, please explain:

### Previously Published Opinions

2. Have you ever authored, coauthored, or publicly provided an opinion related to the topic of these guidelines, e.g., a clinical practice guideline, textbook, review article, meeting poster or presentation, grand rounds talk, letter to the editor?

No

Yes

If yes, what were those views and where were they made?

### Non-Industry Supported Research

3. Currently or in the past 24 months, have you been involved in a leadership role in any research project not already reported under Part B, Question 1, relevant to the topic of these guidelines, e.g., a research project funded by a nonprofit or governmental organization?

No

Yes, as described below:

Column 1 Name the entity funding the research.

Column 2 Describe the research project.

Column 3 Describe your role: (a) national or overall principal investigator, (b) member of a steering committee of a study that does not have a principal investigator, (c) site or local investigator. If other than these options, please describe.

Column 4 Indicate when your involvement ended, if applicable. (If your involvement has not yet ended, indicate "current" or "ongoing.")

Add rows as needed for each research project.

| <i>Funder</i> | <i>Description of Research</i> | <i>My Role</i> | <i>End Date</i> |
|---------------|--------------------------------|----------------|-----------------|
|               |                                |                |                 |

### Institutional Relationships

4. Could your compensation be affected by recommendations on this topic?

Don't know

No

Yes

If yes, please explain:

5. Do you generate revenues for your institution or employer by clinical activity, teaching, speaking, consulting, testifying, writing, or otherwise sharing your knowledge or opinions about this guideline topic?

Don't know

No

Yes

If yes, please explain:

6. Could your institution benefit or be harmed by guidelines on this topic?

Don't know

No

Yes

If yes, please explain:

### Career Advancement

7. How would you characterize the support you would receive from your primary mentor, institution, or other entities if your work on this panel or authorship of these guidelines generated a strong reaction from peers outside your institution?

### Involvement in Organizations With Relevant Policies, Positions, or Guidelines

8. Are you involved as an employee, volunteer, or member of any organization that has published or to your knowledge is currently developing policies, positions, or guidelines relevant to these ASH guidelines, e.g., clinical practice guidelines, appropriate use criteria, expert consensus statement, mission statement, advocacy statement, amicus brief, or legislature or legal testimony?

No

Yes, as described below:

Column 1 Name the organization.

Column 2 Describe or reference the relevant policy, position, or guidelines.

Column 3 Describe your role with the organization, including your involvement in developing, disseminating, or implementing the relevant policy, position, or guidelines.

Add rows as needed for each organization.

| <i>Organization</i> | <i>Relevant Policy Position</i> | <i>Your Role</i> |
|---------------------|---------------------------------|------------------|
|                     |                                 |                  |

#### Clinical Practice

9. Do you see patients clinically?

No

Yes

If yes, what is your primary specialty or subspecialty?

If yes, do you prescribe or otherwise recommend clinical interventions (e.g., screening or diagnostic tests, evaluations, treatments, procedures) that may be addressed by these guidelines?

No

Yes

If yes, please explain:

#### Other

10. Do you have other nonfinancial interests or relationships not described above that could be relevant to the work of developing these guidelines?

No

Yes

If yes, please describe:

### Expected Interests

11. Do you expect to enter into, within the next 24 months, any new **financial or nonfinancial interests** not described above that could be relevant to the work of developing these guidelines?

No

Yes

If yes, please describe:

## Section 2. Attestation of Compliance With Conflict of Interest Policies

In consideration of my participation on these guidelines, I hereby certify and agree that:

| <i>Policy</i>                                                                                                                                                                                                                                                                                                                                                                                                                                                                                                                                                                                                                                                                                                                                                                                                                                                                                                                                                                                                                                                                                                                                                                                                             | <i>Initials</i> |
|---------------------------------------------------------------------------------------------------------------------------------------------------------------------------------------------------------------------------------------------------------------------------------------------------------------------------------------------------------------------------------------------------------------------------------------------------------------------------------------------------------------------------------------------------------------------------------------------------------------------------------------------------------------------------------------------------------------------------------------------------------------------------------------------------------------------------------------------------------------------------------------------------------------------------------------------------------------------------------------------------------------------------------------------------------------------------------------------------------------------------------------------------------------------------------------------------------------------------|-----------------|
| I have reviewed and understand the ASH Principles and Policies on Conflict of Interest published on the ASH website at <a href="https://www.hematology.org/about/governance/conflict-of-interest">https://www.hematology.org/about/governance/conflict-of-interest</a> including the special Policy on Management of Conflicts in the Development of Clinical Practice Guidelines (“ASH Policy”).                                                                                                                                                                                                                                                                                                                                                                                                                                                                                                                                                                                                                                                                                                                                                                                                                         | AN              |
| I have disclosed and will continue to disclose completely all potential conflicts of interest for myself and for my partner or spouse, to the best of my ability and knowledge, in accordance with ASH Policy and this Disclosure Form.                                                                                                                                                                                                                                                                                                                                                                                                                                                                                                                                                                                                                                                                                                                                                                                                                                                                                                                                                                                   | AN              |
| To ensure completeness and avoid discrepancies, I have checked and periodically will check my financial disclosures against other published information, including from the U.S. Centers for Medicare and Medicaid Services’ Open Payments database (or similar non-U.S. database) and explain any discrepant information.                                                                                                                                                                                                                                                                                                                                                                                                                                                                                                                                                                                                                                                                                                                                                                                                                                                                                                | AN              |
| <p>Until submission of the guidelines for publication, I understand and agree that without special exception from ASH, any of the following will disqualify me from continued participation and I will not enter into:</p> <ul style="list-style-type: none"> <li>• Any <b>direct financial interest</b> of myself or my partner or spouse in any <b>for-profit healthcare company or companies</b>, if such interests in aggregate may be reasonably valued to be &gt;\$5,000/year, regardless of relevance to the guidelines</li> <li>• Any noneducational speaking by myself on behalf of any <b>for-profit healthcare company</b> (e.g., service on a company “speakers bureau”), regardless of relevance to the guidelines</li> <li>• Consulting or advising about the marketing of products by any <b>for-profit healthcare company</b> (e.g., service on a company “advisory board”), regardless of relevance to the guidelines</li> <li>• Simultaneous participation on guidelines by another organization on the same topic</li> <li>• Any <i>undisclosed</i> financial interest in any <b>for-profit healthcare company</b> occurring in the 24 months prior to my participation on these guidelines</li> </ul> | AN              |
| I understand that if a disqualifying interest is reported, the usual course of action will be dismissal from participation and acknowledgment within the guideline publication rather than authorship.                                                                                                                                                                                                                                                                                                                                                                                                                                                                                                                                                                                                                                                                                                                                                                                                                                                                                                                                                                                                                    | AN              |
| At regular intervals during the guideline development process, as determined by ASH, I will review my information in this Disclosure Form; provide updated disclosures; and, if requested, attest that I do not have any interests that should disqualify my participation.                                                                                                                                                                                                                                                                                                                                                                                                                                                                                                                                                                                                                                                                                                                                                                                                                                                                                                                                               | AN              |

| <i>Policy</i>                                                                                                                                                                                                               | <i>Initials</i> |
|-----------------------------------------------------------------------------------------------------------------------------------------------------------------------------------------------------------------------------|-----------------|
| I agree to publish with the guidelines my complete disclosures, this agreement, and future attestations.                                                                                                                    | AN              |
| I understand that for 1 year following initial publication of the guidelines, I am encouraged by ASH to avoid new conflicts of interest that could reduce trust in the guidelines, in accordance with my own best judgment. | AN              |

Agreed by [Atefeh Noori]

Date [31 July 2020]

### Section 3. ASH Review Prior to Participation

For ASH Internal Use Only

| <i>Name, Role</i>                                                     | <i>Date</i>    | <i>Management Notes</i> |
|-----------------------------------------------------------------------|----------------|-------------------------|
| Eddrika Russell, ASH staff                                            | August 4, 2020 |                         |
| Menaka Pai, MD, Ex Officio ASH<br>Guideline Oversight<br>Subcommittee | August 4, 2020 | Participation approved  |

## Section 4. Disclosures and Attestations During Participation

For ASH Internal Use Only

| <i>Disclosure or attestation</i> | <i>Date</i>     | <i>Reviewed by</i>     | <i>Management Notes</i>                                           |
|----------------------------------|-----------------|------------------------|-------------------------------------------------------------------|
| Attestation                      | July 2, 2020    | Russell                | Ms. Noori agreed to adhere to the policies described herein.      |
| Attestation                      | October 5, 2021 | Russell                | Ms. Noori agreed to adhere to the policies described herein.      |
|                                  | April 8, 2022   | Deion Smith, ASH Staff | Ms. Noori confirmed that all information in this form is correct. |



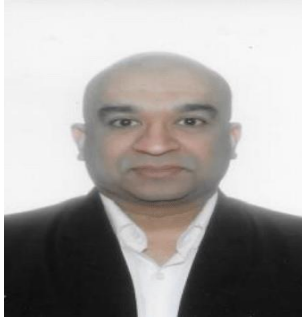

Binu Abraham Philip, BDS, MSc

Research Assistant (IV)

McMaster University

Hamilton, Ontario, Canada

---

### Project

ASH Clinical Practice Guidelines on Anticoagulation in Patients with COVID-19

### Role

Review Team Member

### Profile

Mr. Philip received his Bachelor of Dental Surgery from India and had over eight years of clinical experience involved with all facets of general practice. He earned his Masters in eHealth from McMaster University while working as a Dental Educator with a business consultant group. His experience also involves working at the Health and Impact Research Unit (HIRU) as a Research Assistant. As a graduate of the McMaster eHealth MSc program, his interests lie in research methodologies and data analysis. Apart from research, he is also an avid history researcher.

[2/07/2021 profile approved]

## Section 1. Disclosures Prior to Participation

### Definitions

**Conflict of interest**

A situation in which a reasonable person would consider that an individual’s judgments or actions regarding any aspect of the guideline development process is, or could be perceived to be, influenced by an outside interest

**Financial interest**

A position or relationship held by an individual that offers potential gain or loss of monetary value, such as employment, stock ownership, payment for services, or gifts given with the expectation of reciprocity

**Direct financial interest**

A financial interest that is owned by the individual or received directly by the individual

**Indirect financial interest**

A financial interest that is owned or received via an intermediary, e.g., research funding to an individual received through the individual’s academic institution

**For-profit healthcare company**

“A for-profit entity that develops, produces, markets, or distributes drugs, devices, services, or therapies used to diagnose, treat, monitor, manage, and alleviate health conditions. This definition is not intended to include non-profit entities, entities outside of the healthcare sector, or entities through which physicians provide clinical services directly to patients” (Council of Medical Specialty Societies’ “Code for Interactions With Industry” 2015). This definition is furthermore not viewed by ASH to include companies that provide accredited continuing medical education or that publish scientific or educational content.

### Part A. Direct Financial Interests

#### Employment With For-Profit Healthcare Companies

1. Are you currently or in the past 24 months have you been an employee of any **for-profit healthcare company**?

No

Yes, as described below:

Add rows as needed for each employment relationship.

| <i>Company</i> | <i>Description</i> | <i>End Date</i> | <i>For ASH Internal Use</i> |
|----------------|--------------------|-----------------|-----------------------------|
|                |                    |                 |                             |

### Equity in For-Profit Healthcare Companies

2. Do you currently or in the past 24 months have you had equity in any **for-profit healthcare company**? Equity includes stock, stock options, and other ownership interests but excludes diversified mutual fund shares.

No

Yes, as described below:

Add rows as needed for each equity interest.

| <i>Company</i> | <i>Description</i> | <i>Date Divested</i> | <i>For ASH Internal Use</i> |
|----------------|--------------------|----------------------|-----------------------------|
|                |                    |                      |                             |

### Healthcare-Related Patents, Royalties, and Other Intellectual Property

3. Do you currently or in the past 24 months have you owned patents for or received royalties from any intellectual property or product used to diagnose, treat, monitor, manage, or alleviate health conditions?

No

Yes, as described below:

Add rows as needed for each patent or royalty interest.

| <i>Company</i> | <i>Description</i> | <i>Date Divested</i> | <i>For ASH Internal Use</i> |
|----------------|--------------------|----------------------|-----------------------------|
|                |                    |                      |                             |

### Personal Income or Other Direct Transfers of Value From For-Profit Healthcare Companies

4. Do you currently or in the past 24 months have you received any personal income or other direct transfers of value (e.g., honoraria, gifts, travel support, meeting registration, meals) from any **for-profit healthcare company**?

No

Yes, as described below:

Column 1 Name the company.

Column 2 Describe the activity for which you received the income or other transfer of value, e.g., research, consultancy, speakers bureau involvement, service on an advisory committee or board, expert testimony.

Column 3 Indicate when the activity ended, if applicable. (If the activity has not yet ended, indicate "current" or "ongoing.")

Add rows as needed for each activity.

| <i>Company</i> | <i>Description</i> | <i>End Date</i> | <i>For ASH Internal Use</i> |
|----------------|--------------------|-----------------|-----------------------------|
|                |                    |                 |                             |

#### My Partner's or Spouse's Interests

5. Currently or in the past 24 months has *your partner or spouse* had any of the interests or relationships described in questions 1-4?

No

Yes, as described below:

Add rows as needed for each interest.

| <i>Company</i> | <i>Description</i> | <i>End Date</i> | <i>For ASH Internal Use</i> |
|----------------|--------------------|-----------------|-----------------------------|
|                |                    |                 |                             |

#### Other Relevant Direct Financial Interests

6. Do you have other current or recent (within the past 24 months) **direct financial interests** with any institution, organization, entity or individual that could be relevant to the work of developing these guidelines?

No

Yes

If yes, please explain:

## Part B. Indirect Financial Interests

### Institutional Research Funded by For-Profit Healthcare Companies

1. Through your institution, do you currently or in the past 24 months have you been involved in research funded or supported (e.g., in kind support, such as provision of a study drug) by any **for-profit healthcare company**?

No

Yes, as described below:

Column 1 Name the company funding or supporting the research.

Column 2 Briefly describe the research project.

Column 3 Describe your role: (a) national or overall principal investigator, (b) member of a steering committee of a study that does not have a principal investigator, (c) site or local investigator. If other than these options, please describe.

Column 4 Indicate when your involvement ended, if applicable. (If your involvement has not yet ended, indicate “current” or “ongoing.”)

Add rows as needed for each research project.

| <i>Company</i> | <i>Description of Research</i> | <i>My Role</i> | <i>End Date</i> | <i>For ASH Internal Use</i> |
|----------------|--------------------------------|----------------|-----------------|-----------------------------|
|                |                                |                |                 |                             |

### Paid and Volunteer Activities for Organizations Supported by For-Profit Healthcare Companies

2. Do you currently or in the past 24 months have you been involved in any volunteer or paid work for an organization that is wholly or partially funded by any **for-profit healthcare company**?

No

Yes, as described below:

Column 1 Name the organization. If known to you, describe any industry funding or support.

Column 2 Briefly describe your activity and role, e.g., employment, service on board of directors, other volunteer services.

Column 3 Indicate if your activity was paid or volunteered.

Column 4 Indicate when your involvement with the organization ended. (If your involvement has not yet ended, indicate “current” or “ongoing.”)

Add rows as needed for each organization.

| <i>Organization</i> | <i>Description and role</i> | <i>Paid or Unpaid?</i> | <i>End Date</i> | <i>For ASH Internal Use</i> |
|---------------------|-----------------------------|------------------------|-----------------|-----------------------------|
|                     |                             |                        |                 |                             |

Other Relevant Indirect Financial Interests

3. Do you have other **indirect financial interests** with any: (i) **for-profit healthcare** company; or (ii) other institution, organization, entity or individual that could be relevant to the work of developing these guidelines?

No

Yes

If yes, please explain:

## Part C. Relevant Other Interests That Are Not Mainly Financial

### Personal Beliefs

1. Do you have strongly held beliefs related to the topic of these guidelines?

No

Yes

If yes, please explain:

### Previously Published Opinions

2. Have you ever authored, coauthored, or publicly provided an opinion related to the topic of these guidelines, e.g., a clinical practice guideline, textbook, review article, meeting poster or presentation, grand rounds talk, letter to the editor?

No

Yes

If yes, what were those views and where were they made?

### Non-Industry Supported Research

3. Currently or in the past 24 months, have you been involved in a leadership role in any research project not already reported under Part B, Question 1, relevant to the topic of these guidelines, e.g., a research project funded by a nonprofit or governmental organization?

No

Yes, as described below:

Column 1 Name the entity funding the research.

Column 2 Describe the research project.

Column 3 Describe your role: (a) national or overall principal investigator, (b) member of a steering committee of a study that does not have a principal investigator, (c) site or local investigator. If other than these options, please describe.

Column 4 Indicate when your involvement ended, if applicable. (If your involvement has not yet ended, indicate "current" or "ongoing.")

Add rows as needed for each research project.

| <i>Funder</i> | <i>Description of Research</i> | <i>My Role</i> | <i>End Date</i> |
|---------------|--------------------------------|----------------|-----------------|
|               |                                |                |                 |

### Institutional Relationships

4. Could your compensation be affected by recommendations on this topic?

Don't know

No

Yes

If yes, please explain:

5. Do you generate revenues for your institution or employer by clinical activity, teaching, speaking, consulting, testifying, writing, or otherwise sharing your knowledge or opinions about this guideline topic?

Don't know

No

Yes

If yes, please explain:

6. Could your institution benefit or be harmed by guidelines on this topic?

Don't know

No

Yes

If yes, please explain:

### Career Advancement

7. How would you characterize the support you would receive from your primary mentor, institution, or other entities if your work on this panel or authorship of these guidelines generated a strong reaction from peers outside your institution?

Answer: I hope to receive strong support from my primary mentor and institution if my work on the said panel generated a strong reaction from peers outside the institution.



Involvement in Organizations With Relevant Policies, Positions, or Guidelines

8. Are you involved as an employee, volunteer, or member of any organization that has published or to your knowledge is currently developing policies, positions, or guidelines relevant to these ASH guidelines, e.g., clinical practice guidelines, appropriate use criteria, expert consensus statement, mission statement, advocacy statement, amicus brief, or legislature or legal testimony?

No

Yes, as described below:

Column 1 Name the organization.

Column 2 Describe or reference the relevant policy, position, or guidelines.

Column 3 Describe your role with the organization, including your involvement in developing, disseminating, or implementing the relevant policy, position, or guidelines.

Add rows as needed for each organization.

| <i>Organization</i> | <i>Relevant Policy Position</i> | <i>Your Role</i> |
|---------------------|---------------------------------|------------------|
|                     |                                 |                  |

Clinical Practice

9. Do you see patients clinically?

No

Yes

If yes, what is your primary specialty or subspecialty?

If yes, do you prescribe or otherwise recommend clinical interventions (e.g., screening or diagnostic tests, evaluations, treatments, procedures) that may be addressed by these guidelines?

No

Yes

If yes, please explain:

Other

10. Do you have other nonfinancial interests or relationships not described above that could be relevant to the work of developing these guidelines?

No

Yes

If yes, please describe:

#### Expected Interests

11. Do you expect to enter into, within the next 24 months, any new **financial or nonfinancial interests** not described above that could be relevant to the work of developing these guidelines?

No

Yes

If yes, please describe:

## Section 2. Attestation of Compliance With Conflict of Interest Policies

In consideration of my participation on these guidelines, I hereby certify and agree that:

| <i>Policy</i>                                                                                                                                                                                                                                                                                                                                                                                                                                                                                                                                                                                                                                                                                                                                                                                                                                                                                                                                                                                                                                                                                                                                                                                                             | <i>Initials</i> |
|---------------------------------------------------------------------------------------------------------------------------------------------------------------------------------------------------------------------------------------------------------------------------------------------------------------------------------------------------------------------------------------------------------------------------------------------------------------------------------------------------------------------------------------------------------------------------------------------------------------------------------------------------------------------------------------------------------------------------------------------------------------------------------------------------------------------------------------------------------------------------------------------------------------------------------------------------------------------------------------------------------------------------------------------------------------------------------------------------------------------------------------------------------------------------------------------------------------------------|-----------------|
| I have reviewed and understand the ASH Principles and Policies on Conflict of Interest published on the ASH website at <a href="https://www.hematology.org/about/governance/conflict-of-interest">https://www.hematology.org/about/governance/conflict-of-interest</a> including the special Policy on Management of Conflicts in the Development of Clinical Practice Guidelines (“ASH Policy”).                                                                                                                                                                                                                                                                                                                                                                                                                                                                                                                                                                                                                                                                                                                                                                                                                         | BAP             |
| I have disclosed and will continue to disclose completely all potential conflicts of interest for myself and for my partner or spouse, to the best of my ability and knowledge, in accordance with ASH Policy and this Disclosure Form.                                                                                                                                                                                                                                                                                                                                                                                                                                                                                                                                                                                                                                                                                                                                                                                                                                                                                                                                                                                   | BAP             |
| To ensure completeness and avoid discrepancies, I have checked and periodically will check my financial disclosures against other published information, including from the U.S. Centers for Medicare and Medicaid Services’ Open Payments database (or similar non-U.S. database) and explain any discrepant information.                                                                                                                                                                                                                                                                                                                                                                                                                                                                                                                                                                                                                                                                                                                                                                                                                                                                                                | BAP             |
| <p>Until submission of the guidelines for publication, I understand and agree that without special exception from ASH, any of the following will disqualify me from continued participation and I will not enter into:</p> <ul style="list-style-type: none"> <li>• Any <b>direct financial interest</b> of myself or my partner or spouse in any <b>for-profit healthcare company or companies</b>, if such interests in aggregate may be reasonably valued to be &gt;\$5,000/year, regardless of relevance to the guidelines</li> <li>• Any noneducational speaking by myself on behalf of any <b>for-profit healthcare company</b> (e.g., service on a company “speakers bureau”), regardless of relevance to the guidelines</li> <li>• Consulting or advising about the marketing of products by any <b>for-profit healthcare company</b> (e.g., service on a company “advisory board”), regardless of relevance to the guidelines</li> <li>• Simultaneous participation on guidelines by another organization on the same topic</li> <li>• Any <i>undisclosed</i> financial interest in any <b>for-profit healthcare company</b> occurring in the 24 months prior to my participation on these guidelines</li> </ul> | BAP             |
| I understand that if a disqualifying interest is reported, the usual course of action will be dismissal from participation and acknowledgment within the guideline publication rather than authorship.                                                                                                                                                                                                                                                                                                                                                                                                                                                                                                                                                                                                                                                                                                                                                                                                                                                                                                                                                                                                                    | BAP             |
| At regular intervals during the guideline development process, as determined by ASH, I will review my information in this Disclosure Form; provide updated disclosures; and, if requested, attest that I do not have any interests that should disqualify my participation.                                                                                                                                                                                                                                                                                                                                                                                                                                                                                                                                                                                                                                                                                                                                                                                                                                                                                                                                               | BAP             |

|                                                                                                                                                                                                                             |     |
|-----------------------------------------------------------------------------------------------------------------------------------------------------------------------------------------------------------------------------|-----|
| I agree to publish with the guidelines my complete disclosures, this agreement, and future attestations.                                                                                                                    | BAP |
| I understand that for 1 year following initial publication of the guidelines, I am encouraged by ASH to avoid new conflicts of interest that could reduce trust in the guidelines, in accordance with my own best judgment. | BAP |

Agreed by

Binu, Abraham Philip

Date

02-02-2020

### Section 3. ASH Review Prior to Participation

For ASH Internal Use Only

| <i>Name, Role</i>                                                     | <i>Date</i>      | <i>Management Notes</i> |
|-----------------------------------------------------------------------|------------------|-------------------------|
| Eddrika Russell, ASH staff                                            | February 7, 2020 |                         |
| Menaka Pai, MD, Ex Officio ASH<br>Guideline Oversight<br>Subcommittee | February 7, 2020 | Participation approved  |

## Section 4. Disclosures and Attestations During Participation

For ASH Internal Use Only

| <i>Disclosure or attestation</i> | <i>Date</i>      | <i>Reviewed by</i>     | <i>Management Notes</i>                                                    |
|----------------------------------|------------------|------------------------|----------------------------------------------------------------------------|
| Attestation                      | June 29, 2021    | Russell                | Mr. Abraham Philip agreed to adhere to the policies described herein.      |
| Attestation                      | October 4, 2021  | Russell                | Mr. Abraham Philip agreed to adhere to the policies described herein.      |
| Attestation                      | January 18, 2022 | Deion Smith, ASH Staff | Mr. Abraham Philip agreed to adhere to the policies described herein.      |
|                                  | April 2, 2022    | Smith                  | Mr. Abraham Philip confirmed that all information in this form is correct. |



## ASH Clinical Practice Guidelines Participant Information

---

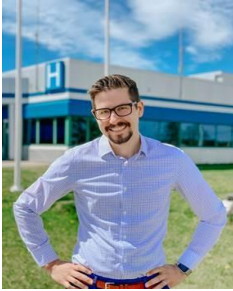

### Thomas Piggott, MD, MSc, CCFP, FRCPC

Medical Officer of Health

Labrador-Grenfell Health

Hamilton, Ontario, Canada; Goose Bay, Newfoundland;

Labrador, Canada

---

#### Project

ASH Clinical Practice Guidelines on Anticoagulation in Patients with COVID-19

#### Role

Review Team Member

#### Profile

Dr. Thomas Piggott is the MOH/CEO of Peterborough Public Health, Dr. Piggott brings experience working at various levels of public health in Canada and Internationally. Most recently, Dr. Piggott has been Medical Officer of Health and VP lead for Population Health and Rural and Remote Health in the northern region of Labrador-Grenfell Health. Dr. Piggott has experience in collaborative Indigenous public health in Canada and internationally.

Prior to working with Labrador-Grenfell Health, Dr. Piggott worked as a field doctor with Médecins Sans Frontières (Doctors Without Borders) in the Democratic Republic of the Congo. Dr. Piggott is a public health and preventive medicine specialist, and a practicing family physician who completed his Masters in Public Health at London School of Hygiene and Tropical Medicine and residency training at McMaster University.

Dr. Piggott is actively involved in research and teaching in public health at McMaster University and Memorial University. Dr. Piggott's research work has focused on guideline development and health equity. He was the co-editor of the book *Under-Served: Health Determinant of Indigenous, Inner-City, and Migrant Populations in Canada* (2018). Dr. Piggott is a member of the GRADE Working Group and has advised in public health guideline development methodology for multiple organizations including the World Health Organization and European Commission. In 2019, Dr. Piggott was appointed to the provincial Health Accord Newfoundland-Labrador Task Force Social Determinants of Health Committee to provide expertise on health system reform. Dr. Piggott has previously served on the board of

directors of the Public Health Physicians of Canada and the World Federation of Public Health Associations and currently sits on the board of directors of the Canadian Public Health Association.

[July 17, 2020 profile approved by Dr. Piggott. Profile updated by Dr. Piggott on March 30, 2022.]



## Section 1. Disclosures Prior to Participation

### Definitions

**Conflict of interest**

A situation in which a reasonable person would consider that an individual’s judgments or actions regarding any aspect of the guideline development process is, or could be perceived to be, influenced by an outside interest

**Financial interest**

A position or relationship held by an individual that offers potential gain or loss of monetary value, such as employment, stock ownership, payment for services, or gifts given with the expectation of reciprocity

**Direct financial interest**

A financial interest that is owned by the individual or received directly by the individual

**Indirect financial interest**

A financial interest that is owned or received via an intermediary, e.g., research funding to an individual received through the individual’s academic institution

**For-profit healthcare company**

“A for-profit entity that develops, produces, markets, or distributes drugs, devices, services, or therapies used to diagnose, treat, monitor, manage, and alleviate health conditions. This definition is not intended to include non-profit entities, entities outside of the healthcare sector, or entities through which physicians provide clinical services directly to patients” (Council of Medical Specialty Societies’ “Code for Interactions With Industry” 2015). This definition is furthermore not viewed by ASH to include companies that provide accredited continuing medical education or that publish scientific or educational content.

### Part A. Direct Financial Interests

#### Employment With For-Profit Healthcare Companies

1. Are you currently or in the past 24 months have you been an employee of any **for-profit healthcare company**?

No

Yes, as described below:

Add rows as needed for each employment relationship.

| <i>Company</i> | <i>Description</i> | <i>End Date</i> | <i>For ASH Internal Use</i> |
|----------------|--------------------|-----------------|-----------------------------|
|                |                    |                 |                             |

### Equity in For-Profit Healthcare Companies

2. Do you currently or in the past 24 months have you had equity in any **for-profit healthcare company**? Equity includes stock, stock options, and other ownership interests but excludes diversified mutual fund shares.

No

Yes, as described below:

Add rows as needed for each equity interest.

| <i>Company</i> | <i>Description</i> | <i>Date Divested</i> | <i>For ASH Internal Use</i> |
|----------------|--------------------|----------------------|-----------------------------|
|                |                    |                      |                             |

### Healthcare-Related Patents, Royalties, and Other Intellectual Property

3. Do you currently or in the past 24 months have you owned patents for or received royalties from any intellectual property or product used to diagnose, treat, monitor, manage, or alleviate health conditions?

No

Yes, as described below:

Add rows as needed for each patent or royalty interest.

| <i>Company</i> | <i>Description</i> | <i>Date Divested</i> | <i>For ASH Internal Use</i> |
|----------------|--------------------|----------------------|-----------------------------|
|                |                    |                      |                             |

### Personal Income or Other Direct Transfers of Value From For-Profit Healthcare Companies

4. Do you currently or in the past 24 months have you received any personal income or other direct transfers of value (e.g., honoraria, gifts, travel support, meeting registration, meals) from any **for-profit healthcare company**?

No

Yes, as described below:

Column 1 Name the company.

Column 2 Describe the activity for which you received the income or other transfer of value, e.g., research, consultancy, speakers bureau involvement, service on an advisory committee or board, expert testimony.

Column 3 Indicate when the activity ended, if applicable. (If the activity has not yet ended, indicate "current" or "ongoing.")

Add rows as needed for each activity.

| <i>Company</i> | <i>Description</i> | <i>End Date</i> | <i>For ASH Internal Use</i> |
|----------------|--------------------|-----------------|-----------------------------|
|                |                    |                 |                             |

#### My Partner's or Spouse's Interests

5. Currently or in the past 24 months has *your partner or spouse* had any of the interests or relationships described in questions 1-4?

No

Yes, as described below:

Add rows as needed for each interest.

| <i>Company</i> | <i>Description</i> | <i>End Date</i> | <i>For ASH Internal Use</i> |
|----------------|--------------------|-----------------|-----------------------------|
|                |                    |                 |                             |

#### Other Relevant Direct Financial Interests

6. Do you have other current or recent (within the past 24 months) **direct financial interests** with any institution, organization, entity or individual that could be relevant to the work of developing these guidelines?

No

Yes

If yes, please explain:

## Part B. Indirect Financial Interests

### Institutional Research Funded by For-Profit Healthcare Companies

1. Through your institution, do you currently or in the past 24 months have you been involved in research funded or supported (e.g., in kind support, such as provision of a study drug) by any **for-profit healthcare company**?

No

Yes, as described below:

Column 1 Name the company funding or supporting the research.

Column 2 Briefly describe the research project.

Column 3 Describe your role: (a) national or overall principal investigator, (b) member of a steering committee of a study that does not have a principal investigator, (c) site or local investigator. If other than these options, please describe.

Column 4 Indicate when your involvement ended, if applicable. (If your involvement has not yet ended, indicate “current” or “ongoing.”)

Add rows as needed for each research project.

| <i>Company</i> | <i>Description of Research</i> | <i>My Role</i> | <i>End Date</i> | <i>For ASH Internal Use</i> |
|----------------|--------------------------------|----------------|-----------------|-----------------------------|
|                |                                |                |                 |                             |

### Paid and Volunteer Activities for Organizations Supported by For-Profit Healthcare Companies

2. Do you currently or in the past 24 months have you been involved in any volunteer or paid work for an organization that is wholly or partially funded by any **for-profit healthcare company**?

No

Yes, as described below:

Column 1 Name the organization. If known to you, describe any industry funding or support.

Column 2 Briefly describe your activity and role, e.g., employment, service on board of directors, other volunteer services.

Column 3 Indicate if your activity was paid or volunteered.

Column 4 Indicate when your involvement with the organization ended. (If your involvement has not yet ended, indicate “current” or “ongoing.”)

Add rows as needed for each organization.

| <i>Organization</i> | <i>Description and role</i> | <i>Paid or Unpaid?</i> | <i>End Date</i> | <i>For ASH Internal Use</i> |
|---------------------|-----------------------------|------------------------|-----------------|-----------------------------|
|                     |                             |                        |                 |                             |

Other Relevant Indirect Financial Interests

3. Do you have other **indirect financial interests** with any: (i) **for-profit healthcare** company; or (ii) other institution, organization, entity or individual that could be relevant to the work of developing these guidelines?

No

Yes

If yes, please explain:

## Part C. Relevant Other Interests That Are Not Mainly Financial

### Personal Beliefs

1. Do you have strongly held beliefs related to the topic of these guidelines?

No

Yes

If yes, please explain:

### Previously Published Opinions

2. Have you ever authored, coauthored, or publicly provided an opinion related to the topic of these guidelines, e.g., a clinical practice guideline, textbook, review article, meeting poster or presentation, grand rounds talk, letter to the editor?

No

Yes

If yes, what were those views and where were they made?

### Non-Industry Supported Research

3. Currently or in the past 24 months, have you been involved in a leadership role in any research project not already reported under Part B, Question 1, relevant to the topic of these guidelines, e.g., a research project funded by a nonprofit or governmental organization?

No

Yes, as described below:

Column 1 Name the entity funding the research.

Column 2 Describe the research project.

Column 3 Describe your role: (a) national or overall principal investigator, (b) member of a steering committee of a study that does not have a principal investigator, (c) site or local investigator. If other than these options, please describe.

Column 4 Indicate when your involvement ended, if applicable. (If your involvement has not yet ended, indicate "current" or "ongoing.")

Add rows as needed for each research project.

| <i>Funder</i> | <i>Description of Research</i> | <i>My Role</i> | <i>End Date</i> |
|---------------|--------------------------------|----------------|-----------------|
|               |                                |                |                 |

### Institutional Relationships

4. Could your compensation be affected by recommendations on this topic?

Don't know

No

Yes

If yes, please explain:

5. Do you generate revenues for your institution or employer by clinical activity, teaching, speaking, consulting, testifying, writing, or otherwise sharing your knowledge or opinions about this guideline topic?

Don't know

No

Yes

If yes, please explain:

6. Could your institution benefit or be harmed by guidelines on this topic?

Don't know

No

Yes

If yes, please explain:

### Career Advancement

7. How would you characterize the support you would receive from your primary mentor, institution, or other entities if your work on this panel or authorship of these guidelines generated a strong reaction from peers outside your institution?

No concerns foreseen.

### Involvement in Organizations With Relevant Policies, Positions, or Guidelines

8. Are you involved as an employee, volunteer, or member of any organization that has published or to your knowledge is currently developing policies, positions, or guidelines relevant to these ASH

guidelines, e.g., clinical practice guidelines, appropriate use criteria, expert consensus statement, mission statement, advocacy statement, amicus brief, or legislature or legal testimony?

No

Yes, as described below:

Column 1 Name the organization.

Column 2 Describe or reference the relevant policy, position, or guidelines.

Column 3 Describe your role with the organization, including your involvement in developing, disseminating, or implementing the relevant policy, position, or guidelines.

Add rows as needed for each organization.

| <i>Organization</i> | <i>Relevant Policy Position</i> | <i>Your Role</i> |
|---------------------|---------------------------------|------------------|
|                     |                                 |                  |

#### Clinical Practice

9. Do you see patients clinically?

No

Yes

If yes, what is your primary specialty or subspecialty?

Emergency medicine

If yes, do you prescribe or otherwise recommend clinical interventions (e.g., screening or diagnostic tests, evaluations, treatments, procedures) that may be addressed by these guidelines?

No

Yes

If yes, please explain:

#### Other

10. Do you have other nonfinancial interests or relationships not described above that could be relevant to the work of developing these guidelines?

No

Yes



If yes, please describe:

#### Expected Interests

11. Do you expect to enter into, within the next 24 months, any new **financial or nonfinancial interests** not described above that could be relevant to the work of developing these guidelines?

No

Yes

If yes, please describe:

## Section 2. Attestation of Compliance With Conflict of Interest Policies

In consideration of my participation on these guidelines, I hereby certify and agree that:

| <i>Policy</i>                                                                                                                                                                                                                                                                                                                                                                                                                                                                                                                                                                                                                                                                                                                                                                                                                                                                                                                                                                                                                                                                                                                                                                                                             | <i>Initials</i> |
|---------------------------------------------------------------------------------------------------------------------------------------------------------------------------------------------------------------------------------------------------------------------------------------------------------------------------------------------------------------------------------------------------------------------------------------------------------------------------------------------------------------------------------------------------------------------------------------------------------------------------------------------------------------------------------------------------------------------------------------------------------------------------------------------------------------------------------------------------------------------------------------------------------------------------------------------------------------------------------------------------------------------------------------------------------------------------------------------------------------------------------------------------------------------------------------------------------------------------|-----------------|
| I have reviewed and understand the ASH Principles and Policies on Conflict of Interest published on the ASH website at <a href="https://www.hematology.org/about/governance/conflict-of-interest">https://www.hematology.org/about/governance/conflict-of-interest</a> including the special Policy on Management of Conflicts in the Development of Clinical Practice Guidelines (“ASH Policy”).                                                                                                                                                                                                                                                                                                                                                                                                                                                                                                                                                                                                                                                                                                                                                                                                                         | TP              |
| I have disclosed and will continue to disclose completely all potential conflicts of interest for myself and for my partner or spouse, to the best of my ability and knowledge, in accordance with ASH Policy and this Disclosure Form.                                                                                                                                                                                                                                                                                                                                                                                                                                                                                                                                                                                                                                                                                                                                                                                                                                                                                                                                                                                   | TP              |
| To ensure completeness and avoid discrepancies, I have checked and periodically will check my financial disclosures against other published information, including from the U.S. Centers for Medicare and Medicaid Services’ Open Payments database (or similar non-U.S. database) and explain any discrepant information.                                                                                                                                                                                                                                                                                                                                                                                                                                                                                                                                                                                                                                                                                                                                                                                                                                                                                                | TP              |
| <p>Until submission of the guidelines for publication, I understand and agree that without special exception from ASH, any of the following will disqualify me from continued participation and I will not enter into:</p> <ul style="list-style-type: none"> <li>• Any <b>direct financial interest</b> of myself or my partner or spouse in any <b>for-profit healthcare company or companies</b>, if such interests in aggregate may be reasonably valued to be &gt;\$5,000/year, regardless of relevance to the guidelines</li> <li>• Any noneducational speaking by myself on behalf of any <b>for-profit healthcare company</b> (e.g., service on a company “speakers bureau”), regardless of relevance to the guidelines</li> <li>• Consulting or advising about the marketing of products by any <b>for-profit healthcare company</b> (e.g., service on a company “advisory board”), regardless of relevance to the guidelines</li> <li>• Simultaneous participation on guidelines by another organization on the same topic</li> <li>• Any <i>undisclosed</i> financial interest in any <b>for-profit healthcare company</b> occurring in the 24 months prior to my participation on these guidelines</li> </ul> | TP              |
| I understand that if a disqualifying interest is reported, the usual course of action will be dismissal from participation and acknowledgment within the guideline publication rather than authorship.                                                                                                                                                                                                                                                                                                                                                                                                                                                                                                                                                                                                                                                                                                                                                                                                                                                                                                                                                                                                                    | TP              |
| At regular intervals during the guideline development process, as determined by ASH, I will review my information in this Disclosure Form; provide updated disclosures; and, if requested, attest that I do not have any interests that should disqualify my participation.                                                                                                                                                                                                                                                                                                                                                                                                                                                                                                                                                                                                                                                                                                                                                                                                                                                                                                                                               | TP              |

|                                                                                                                                                                                                                             |    |
|-----------------------------------------------------------------------------------------------------------------------------------------------------------------------------------------------------------------------------|----|
| I agree to publish with the guidelines my complete disclosures, this agreement, and future attestations.                                                                                                                    | TP |
| I understand that for 1 year following initial publication of the guidelines, I am encouraged by ASH to avoid new conflicts of interest that could reduce trust in the guidelines, in accordance with my own best judgment. | TP |

Agreed by

Thomas Piggott

Date

June 28 2020

### Section 3. ASH Review Prior to Participation

For ASH Internal Use Only

| <i>Name, Role</i>                                                     | <i>Date</i>   | <i>Management Notes</i> |
|-----------------------------------------------------------------------|---------------|-------------------------|
| Eddrika Russell, ASH staff                                            | June 28, 2020 |                         |
| Menaka Pai, MD, Ex Officio ASH<br>Guideline Oversight<br>Subcommittee | July 16, 2020 | Participation approved  |

## Section 4. Disclosures and Attestations During Participation

For ASH Internal Use Only

| <i>Disclosure or attestation</i> | <i>Date</i>     | <i>Reviewed by</i>     | <i>Management Notes</i>                                             |
|----------------------------------|-----------------|------------------------|---------------------------------------------------------------------|
| Attestation                      | June 29, 2021   | Russell                | Dr. Piggott agreed to adhere to the policies described herein.      |
| Attestation                      | October 2, 2021 | Russell                | Dr. Piggott agreed to adhere to the policies described herein.      |
|                                  | March 30, 2022  | Deion Smith, ASH Staff | Dr. Piggott confirmed that all information in this form is correct. |
|                                  |                 |                        |                                                                     |



ASH Clinical Practice Guidelines  
Participant Information

---

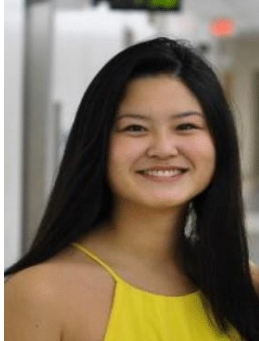

Yuan Yuan Qiu, BHSc

Medical Student

McMaster University

Hamilton, ON, Canada

---

### Project

ASH Clinical Practice Guidelines on Anticoagulation in Patients with COVID-19

### Role

Review Team Member

### Profile

Ms. Qiu is currently a medical student at the Michael G. DeGroot School of Medicine in Hamilton, Ontario. She graduated from the Bachelor of Health Sciences program at McMaster University. She is interested in clinical and epidemiological research related to the cardiovascular and gastrointestinal systems.

[August 31, 2020 profile approved by Ms. Qiu]

## Section 1. Disclosures Prior to Participation

### Definitions

|                                             |                                                                                                                                                                                                                                                                                                                                                                                                                                                                                                                                                                                                                                                             |
|---------------------------------------------|-------------------------------------------------------------------------------------------------------------------------------------------------------------------------------------------------------------------------------------------------------------------------------------------------------------------------------------------------------------------------------------------------------------------------------------------------------------------------------------------------------------------------------------------------------------------------------------------------------------------------------------------------------------|
| <b><i>Conflict of interest</i></b>          | A situation in which a reasonable person would consider that an individual’s judgments or actions regarding any aspect of the guideline development process is, or could be perceived to be, influenced by an outside interest                                                                                                                                                                                                                                                                                                                                                                                                                              |
| <b><i>Financial interest</i></b>            | A position or relationship held by an individual that offers potential gain or loss of monetary value, such as employment, stock ownership, payment for services, or gifts given with the expectation of reciprocity                                                                                                                                                                                                                                                                                                                                                                                                                                        |
| <b><i>Direct financial interest</i></b>     | A financial interest that is owned by the individual or received directly by the individual                                                                                                                                                                                                                                                                                                                                                                                                                                                                                                                                                                 |
| <b><i>Indirect financial interest</i></b>   | A financial interest that is owned or received via an intermediary, e.g., research funding to an individual received through the individual’s academic institution                                                                                                                                                                                                                                                                                                                                                                                                                                                                                          |
| <b><i>For-profit healthcare company</i></b> | “A for-profit entity that develops, produces, markets, or distributes drugs, devices, services, or therapies used to diagnose, treat, monitor, manage, and alleviate health conditions. This definition is not intended to include non-profit entities, entities outside of the healthcare sector, or entities through which physicians provide clinical services directly to patients” (Council of Medical Specialty Societies’ “Code for Interactions With Industry” 2015). This definition is furthermore not viewed by ASH to include companies that provide accredited continuing medical education or that publish scientific or educational content. |

### Part A. Direct Financial Interests

#### Employment With For-Profit Healthcare Companies

1. Are you currently or in the past 24 months have you been an employee of any **for-profit healthcare company**?

No

Yes, as described below:

Add rows as needed for each employment relationship.

| <i>Company</i> | <i>Description</i> | <i>End Date</i> | <i>For ASH Internal Use</i> |
|----------------|--------------------|-----------------|-----------------------------|
|                |                    |                 |                             |

### Equity in For-Profit Healthcare Companies

2. Do you currently or in the past 24 months have you had equity in any **for-profit healthcare company**? Equity includes stock, stock options, and other ownership interests but excludes diversified mutual fund shares.

No

Yes, as described below:

Add rows as needed for each equity interest.

| <i>Company</i> | <i>Description</i> | <i>Date Divested</i> | <i>For ASH Internal Use</i> |
|----------------|--------------------|----------------------|-----------------------------|
|                |                    |                      |                             |

### Healthcare-Related Patents, Royalties, and Other Intellectual Property

3. Do you currently or in the past 24 months have you owned patents for or received royalties from any intellectual property or product used to diagnose, treat, monitor, manage, or alleviate health conditions?

No

Yes, as described below:

Add rows as needed for each patent or royalty interest.

| <i>Company</i> | <i>Description</i> | <i>Date Divested</i> | <i>For ASH Internal Use</i> |
|----------------|--------------------|----------------------|-----------------------------|
|                |                    |                      |                             |

### Personal Income or Other Direct Transfers of Value From For-Profit Healthcare Companies

4. Do you currently or in the past 24 months have you received any personal income or other direct transfers of value (e.g., honoraria, gifts, travel support, meeting registration, meals) from any **for-profit healthcare company**?

No

Yes, as described below:

Column 1 Name the company.

Column 2 Describe the activity for which you received the income or other transfer of value, e.g., research, consultancy, speakers bureau involvement, service on an advisory committee or board, expert testimony.

Column 3 Indicate when the activity ended, if applicable. (If the activity has not yet ended, indicate "current" or "ongoing.")



Add rows as needed for each activity.

| <i>Company</i> | <i>Description</i> | <i>End Date</i> | <i>For ASH Internal Use</i> |
|----------------|--------------------|-----------------|-----------------------------|
|                |                    |                 |                             |

#### My Partner's or Spouse's Interests

5. Currently or in the past 24 months has *your partner or spouse* had any of the interests or relationships described in questions 1-4?

No

Yes, as described below:

Add rows as needed for each interest.

| <i>Company</i> | <i>Description</i> | <i>End Date</i> | <i>For ASH Internal Use</i> |
|----------------|--------------------|-----------------|-----------------------------|
|                |                    |                 |                             |

#### Other Relevant Direct Financial Interests

6. Do you have other current or recent (within the past 24 months) **direct financial interests** with any institution, organization, entity or individual that could be relevant to the work of developing these guidelines?

No

Yes

If yes, please explain:

## Part B. Indirect Financial Interests

### Institutional Research Funded by For-Profit Healthcare Companies

1. Through your institution, do you currently or in the past 24 months have you been involved in research funded or supported (e.g., in kind support, such as provision of a study drug) by any **for-profit healthcare company**?

No

Yes, as described below:

Column 1 Name the company funding or supporting the research.

Column 2 Briefly describe the research project.

Column 3 Describe your role: (a) national or overall principal investigator, (b) member of a steering committee of a study that does not have a principal investigator, (c) site or local investigator. If other than these options, please describe.

Column 4 Indicate when your involvement ended, if applicable. (If your involvement has not yet ended, indicate “current” or “ongoing.”)

Add rows as needed for each research project.

| <i>Company</i> | <i>Description of Research</i> | <i>My Role</i> | <i>End Date</i> | <i>For ASH Internal Use</i> |
|----------------|--------------------------------|----------------|-----------------|-----------------------------|
|                |                                |                |                 |                             |

### Paid and Volunteer Activities for Organizations Supported by For-Profit Healthcare Companies

2. Do you currently or in the past 24 months have you been involved in any volunteer or paid work for an organization that is wholly or partially funded by any **for-profit healthcare company**?

No

Yes, as described below:

Column 1 Name the organization. If known to you, describe any industry funding or support.

Column 2 Briefly describe your activity and role, e.g., employment, service on board of directors, other volunteer services.

Column 3 Indicate if your activity was paid or volunteered.

Column 4 Indicate when your involvement with the organization ended. (If your involvement has not yet ended, indicate “current” or “ongoing.”)

Add rows as needed for each organization.

| <i>Organization</i> | <i>Description and role</i> | <i>Paid or Unpaid?</i> | <i>End Date</i> | <i>For ASH Internal Use</i> |
|---------------------|-----------------------------|------------------------|-----------------|-----------------------------|
|                     |                             |                        |                 |                             |

Other Relevant Indirect Financial Interests

3. Do you have other **indirect financial interests** with any: (i) **for-profit healthcare** company; or (ii) other institution, organization, entity or individual that could be relevant to the work of developing these guidelines?

No

Yes

If yes, please explain:

## Part C. Relevant Other Interests That Are Not Mainly Financial

### Personal Beliefs

1. Do you have strongly held beliefs related to the topic of these guidelines?

No

Yes

If yes, please explain:

### Previously Published Opinions

2. Have you ever authored, coauthored, or publicly provided an opinion related to the topic of these guidelines, e.g., a clinical practice guideline, textbook, review article, meeting poster or presentation, grand rounds talk, letter to the editor?

No

Yes

If yes, what were those views and where were they made?

### Non-Industry Supported Research

3. Currently or in the past 24 months, have you been involved in a leadership role in any research project not already reported under Part B, Question 1, relevant to the topic of these guidelines, e.g., a research project funded by a nonprofit or governmental organization?

No

Yes, as described below:

Column 1 Name the entity funding the research.

Column 2 Describe the research project.

Column 3 Describe your role: (a) national or overall principal investigator, (b) member of a steering committee of a study that does not have a principal investigator, (c) site or local investigator. If other than these options, please describe.

Column 4 Indicate when your involvement ended, if applicable. (If your involvement has not yet ended, indicate "current" or "ongoing.")

Add rows as needed for each research project.

| <i>Funder</i> | <i>Description of Research</i> | <i>My Role</i> | <i>End Date</i> |
|---------------|--------------------------------|----------------|-----------------|
|               |                                |                |                 |

### Institutional Relationships

4. Could your compensation be affected by recommendations on this topic?

Don't know

No

Yes

If yes, please explain:

5. Do you generate revenues for your institution or employer by clinical activity, teaching, speaking, consulting, testifying, writing, or otherwise sharing your knowledge or opinions about this guideline topic?

Don't know

No

Yes

If yes, please explain:

6. Could your institution benefit or be harmed by guidelines on this topic?

Don't know

No

Yes

If yes, please explain:

### Career Advancement

7. How would you characterize the support you would receive from your primary mentor, institution, or other entities if your work on this panel or authorship of these guidelines generated a strong reaction from peers outside your institution?

The researchers I am working with are experts in the field with many years of experience so I would be adequately supported in that case. Additionally, McMaster is a research intensive school in which I'm sure I would receive plenty of support for if these guidelines generated a strong reaction from peers outside of my institution.

Involvement in Organizations With Relevant Policies, Positions, or Guidelines

8. Are you involved as an employee, volunteer, or member of any organization that has published or to your knowledge is currently developing policies, positions, or guidelines relevant to these ASH guidelines, e.g., clinical practice guidelines, appropriate use criteria, expert consensus statement, mission statement, advocacy statement, amicus brief, or legislature or legal testimony?

No

Yes, as described below:

Column 1 Name the organization.

Column 2 Describe or reference the relevant policy, position, or guidelines.

Column 3 Describe your role with the organization, including your involvement in developing, disseminating, or implementing the relevant policy, position, or guidelines.

Add rows as needed for each organization.

| <i>Organization</i> | <i>Relevant Policy Position</i> | <i>Your Role</i> |
|---------------------|---------------------------------|------------------|
|                     |                                 |                  |

Clinical Practice

9. Do you see patients clinically?

No

Yes

If yes, what is your primary specialty or subspecialty?

If yes, do you prescribe or otherwise recommend clinical interventions (e.g., screening or diagnostic tests, evaluations, treatments, procedures) that may be addressed by these guidelines?

No

Yes

If yes, please explain:

Other

10. Do you have other nonfinancial interests or relationships not described above that could be relevant to the work of developing these guidelines?

No

Yes

If yes, please describe:

#### Expected Interests

11. Do you expect to enter into, within the next 24 months, any new **financial or nonfinancial interests** not described above that could be relevant to the work of developing these guidelines?

No

Yes

If yes, please describe:

## Section 2. Attestation of Compliance With Conflict of Interest Policies

In consideration of my participation on these guidelines, I hereby certify and agree that:

| <i>Policy</i>                                                                                                                                                                                                                                                                                                                                                                                                                                                                                                                                                                                                                                                                                                                                                                                                                                                                                                                                                                                                                                                                                                                                                                                                             | <i>Initials</i> |
|---------------------------------------------------------------------------------------------------------------------------------------------------------------------------------------------------------------------------------------------------------------------------------------------------------------------------------------------------------------------------------------------------------------------------------------------------------------------------------------------------------------------------------------------------------------------------------------------------------------------------------------------------------------------------------------------------------------------------------------------------------------------------------------------------------------------------------------------------------------------------------------------------------------------------------------------------------------------------------------------------------------------------------------------------------------------------------------------------------------------------------------------------------------------------------------------------------------------------|-----------------|
| I have reviewed and understand the ASH Principles and Policies on Conflict of Interest published on the ASH website at <a href="https://www.hematology.org/about/governance/conflict-of-interest">https://www.hematology.org/about/governance/conflict-of-interest</a> including the special Policy on Management of Conflicts in the Development of Clinical Practice Guidelines (“ASH Policy”).                                                                                                                                                                                                                                                                                                                                                                                                                                                                                                                                                                                                                                                                                                                                                                                                                         | YQ              |
| I have disclosed and will continue to disclose completely all potential conflicts of interest for myself and for my partner or spouse, to the best of my ability and knowledge, in accordance with ASH Policy and this Disclosure Form.                                                                                                                                                                                                                                                                                                                                                                                                                                                                                                                                                                                                                                                                                                                                                                                                                                                                                                                                                                                   | YQ              |
| To ensure completeness and avoid discrepancies, I have checked and periodically will check my financial disclosures against other published information, including from the U.S. Centers for Medicare and Medicaid Services’ Open Payments database (or similar non-U.S. database) and explain any discrepant information.                                                                                                                                                                                                                                                                                                                                                                                                                                                                                                                                                                                                                                                                                                                                                                                                                                                                                                | YQ              |
| <p>Until submission of the guidelines for publication, I understand and agree that without special exception from ASH, any of the following will disqualify me from continued participation and I will not enter into:</p> <ul style="list-style-type: none"> <li>• Any <b>direct financial interest</b> of myself or my partner or spouse in any <b>for-profit healthcare company or companies</b>, if such interests in aggregate may be reasonably valued to be &gt;\$5,000/year, regardless of relevance to the guidelines</li> <li>• Any noneducational speaking by myself on behalf of any <b>for-profit healthcare company</b> (e.g., service on a company “speakers bureau”), regardless of relevance to the guidelines</li> <li>• Consulting or advising about the marketing of products by any <b>for-profit healthcare company</b> (e.g., service on a company “advisory board”), regardless of relevance to the guidelines</li> <li>• Simultaneous participation on guidelines by another organization on the same topic</li> <li>• Any <i>undisclosed</i> financial interest in any <b>for-profit healthcare company</b> occurring in the 24 months prior to my participation on these guidelines</li> </ul> | YQ              |
| I understand that if a disqualifying interest is reported, the usual course of action will be dismissal from participation and acknowledgment within the guideline publication rather than authorship.                                                                                                                                                                                                                                                                                                                                                                                                                                                                                                                                                                                                                                                                                                                                                                                                                                                                                                                                                                                                                    | YQ              |
| At regular intervals during the guideline development process, as determined by ASH, I will review my information in this Disclosure Form; provide updated disclosures; and, if requested, attest that I do not have any interests that should disqualify my participation.                                                                                                                                                                                                                                                                                                                                                                                                                                                                                                                                                                                                                                                                                                                                                                                                                                                                                                                                               | YQ              |



|                                                                                                                                                                                                                             |    |
|-----------------------------------------------------------------------------------------------------------------------------------------------------------------------------------------------------------------------------|----|
| I agree to publish with the guidelines my complete disclosures, this agreement, and future attestations.                                                                                                                    | YQ |
| I understand that for 1 year following initial publication of the guidelines, I am encouraged by ASH to avoid new conflicts of interest that could reduce trust in the guidelines, in accordance with my own best judgment. | YQ |

Agreed by

Yuan Yuan Qiu

Date

August 25, 2020

### Section 3. ASH Review Prior to Participation

For ASH Internal Use Only

| <i>Name, Role</i>                                                     | <i>Date</i>     | <i>Management Notes</i> |
|-----------------------------------------------------------------------|-----------------|-------------------------|
| Eddrika Russell, ASH Staff                                            | August 25, 2020 |                         |
| Menaka Pai, MD, Ex Officio ASH<br>Guideline Oversight<br>Subcommittee | August 28, 2020 | Participation approved  |

## Section 4. Disclosures and Attestations During Participation

For ASH Internal Use Only

| <i>Disclosure or attestation</i> | <i>Date</i>      | <i>Reviewed by</i>     | <i>Management Notes</i>                                                |
|----------------------------------|------------------|------------------------|------------------------------------------------------------------------|
| Attestation                      | July 6, 2021     | Russell                | Ms. Qiu agreed to continue to adhere to the policies described herein. |
| Attestation                      | October 5, 2021  | Russell                | Ms. Qiu agreed to continue to adhere to the policies described herein. |
| Attestation                      | January 18, 2022 | Deion Smith, ASH Staff | Ms. Qiu agreed to continue to adhere to the policies described herein. |
|                                  | March 30, 2022   | Smith                  | Ms. Qiu confirmed that all information in this form was correct.       |



ASH Clinical Practice Guidelines  
Participant Information

---

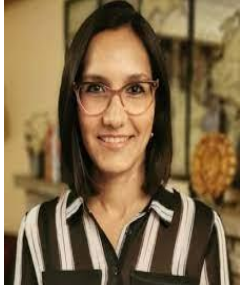

## Yetiani Maria Roldan, MD

Research Assistant

HEI department, McMaster University

Hamilton, Ontario, Canada

---

### Project

ASH Clinical Practice Guidelines on Anticoagulation in Patients with COVID-19

### Role

Review Team Member

### Profile

Dr. Roldan earned her medical degree in 2007 at the Universidad Autonoma de Nuevo Leon, Mexico and specialized as Pediatrician in 2012 (Tecnologico de Monterrey School of Medicine, Mexico). She has NICU/PICU experience and is currently working as a researcher in the Department of Health Research Methods, Evidence, and Impact (HEI) at McMaster University, participating in the development of systematic reviews and clinical practice guidelines.

[August 31, 2020 profile approved by Dr. Roldan. Updated January 18, 2022.]

## Section 1. Disclosures Prior to Participation

### Definitions

**Conflict of interest**

A situation in which a reasonable person would consider that an individual’s judgments or actions regarding any aspect of the guideline development process is, or could be perceived to be, influenced by an outside interest

**Financial interest**

A position or relationship held by an individual that offers potential gain or loss of monetary value, such as employment, stock ownership, payment for services, or gifts given with the expectation of reciprocity

**Direct financial interest**

A financial interest that is owned by the individual or received directly by the individual

**Indirect financial interest**

A financial interest that is owned or received via an intermediary, e.g., research funding to an individual received through the individual’s academic institution

**For-profit healthcare company**

“A for-profit entity that develops, produces, markets, or distributes drugs, devices, services, or therapies used to diagnose, treat, monitor, manage, and alleviate health conditions. This definition is not intended to include non-profit entities, entities outside of the healthcare sector, or entities through which physicians provide clinical services directly to patients” (Council of Medical Specialty Societies’ “Code for Interactions With Industry” 2015). This definition is furthermore not viewed by ASH to include companies that provide accredited continuing medical education or that publish scientific or educational content.

### Part A. Direct Financial Interests

#### Employment With For-Profit Healthcare Companies

1. Are you currently or in the past 24 months have you been an employee of any **for-profit healthcare company**?

No

Yes, as described below:

Add rows as needed for each employment relationship.

| <i>Company</i> | <i>Description</i> | <i>End Date</i> | <i>For ASH Internal Use</i> |
|----------------|--------------------|-----------------|-----------------------------|
|                |                    |                 |                             |

### Equity in For-Profit Healthcare Companies

2. Do you currently or in the past 24 months have you had equity in any **for-profit healthcare company**? Equity includes stock, stock options, and other ownership interests but excludes diversified mutual fund shares.

No

Yes, as described below:

Add rows as needed for each equity interest.

| <i>Company</i> | <i>Description</i> | <i>Date Divested</i> | <i>For ASH Internal Use</i> |
|----------------|--------------------|----------------------|-----------------------------|
|                |                    |                      |                             |

### Healthcare-Related Patents, Royalties, and Other Intellectual Property

3. Do you currently or in the past 24 months have you owned patents for or received royalties from any intellectual property or product used to diagnose, treat, monitor, manage, or alleviate health conditions?

No

Yes, as described below:

Add rows as needed for each patent or royalty interest.

| <i>Company</i> | <i>Description</i> | <i>Date Divested</i> | <i>For ASH Internal Use</i> |
|----------------|--------------------|----------------------|-----------------------------|
|                |                    |                      |                             |

### Personal Income or Other Direct Transfers of Value From For-Profit Healthcare Companies

4. Do you currently or in the past 24 months have you received any personal income or other direct transfers of value (e.g., honoraria, gifts, travel support, meeting registration, meals) from any **for-profit healthcare company**?

No

Yes, as described below:

Column 1 Name the company.

Column 2 Describe the activity for which you received the income or other transfer of value, e.g., research, consultancy, speakers bureau involvement, service on an advisory committee or board, expert testimony.

Column 3 Indicate when the activity ended, if applicable. (If the activity has not yet ended, indicate "current" or "ongoing.")

Add rows as needed for each activity.

| <i>Company</i> | <i>Description</i> | <i>End Date</i> | <i>For ASH Internal Use</i> |
|----------------|--------------------|-----------------|-----------------------------|
|                |                    |                 |                             |

#### My Partner's or Spouse's Interests

5. Currently or in the past 24 months has *your partner or spouse* had any of the interests or relationships described in questions 1-4?

No

Yes, as described below:

Add rows as needed for each interest.

| <i>Company</i> | <i>Description</i> | <i>End Date</i> | <i>For ASH Internal Use</i> |
|----------------|--------------------|-----------------|-----------------------------|
|                |                    |                 |                             |

#### Other Relevant Direct Financial Interests

6. Do you have other current or recent (within the past 24 months) **direct financial interests** with any institution, organization, entity or individual that could be relevant to the work of developing these guidelines?

No

Yes

If yes, please explain:

## Part B. Indirect Financial Interests

### Institutional Research Funded by For-Profit Healthcare Companies

1. Through your institution, do you currently or in the past 24 months have you been involved in research funded or supported (e.g., in kind support, such as provision of a study drug) by any **for-profit healthcare company**?

No

Yes, as described below:

Column 1 Name the company funding or supporting the research.

Column 2 Briefly describe the research project.

Column 3 Describe your role: (a) national or overall principal investigator, (b) member of a steering committee of a study that does not have a principal investigator, (c) site or local investigator. If other than these options, please describe.

Column 4 Indicate when your involvement ended, if applicable. (If your involvement has not yet ended, indicate “current” or “ongoing.”)

Add rows as needed for each research project.

| <i>Company</i> | <i>Description of Research</i> | <i>My Role</i> | <i>End Date</i> | <i>For ASH Internal Use</i> |
|----------------|--------------------------------|----------------|-----------------|-----------------------------|
|                |                                |                |                 |                             |

### Paid and Volunteer Activities for Organizations Supported by For-Profit Healthcare Companies

2. Do you currently or in the past 24 months have you been involved in any volunteer or paid work for an organization that is wholly or partially funded by any **for-profit healthcare company**?

No

Yes, as described below:

Column 1 Name the organization. If known to you, describe any industry funding or support.

Column 2 Briefly describe your activity and role, e.g., employment, service on board of directors, other volunteer services.

Column 3 Indicate if your activity was paid or volunteered.

Column 4 Indicate when your involvement with the organization ended. (If your involvement has not yet ended, indicate “current” or “ongoing.”)

Add rows as needed for each organization.



| <i>Organization</i> | <i>Description and role</i> | <i>Paid or Unpaid?</i> | <i>End Date</i> | <i>For ASH Internal Use</i> |
|---------------------|-----------------------------|------------------------|-----------------|-----------------------------|
|                     |                             |                        |                 |                             |

Other Relevant Indirect Financial Interests

3. Do you have other **indirect financial interests** with any: (i) **for-profit healthcare** company; or (ii) other institution, organization, entity or individual that could be relevant to the work of developing these guidelines?

No

Yes

If yes, please explain:

## Part C. Relevant Other Interests That Are Not Mainly Financial

### Personal Beliefs

1. Do you have strongly held beliefs related to the topic of these guidelines?

No

Yes

If yes, please explain:

### Previously Published Opinions

2. Have you ever authored, coauthored, or publicly provided an opinion related to the topic of these guidelines, e.g., a clinical practice guideline, textbook, review article, meeting poster or presentation, grand rounds talk, letter to the editor?

No

Yes

If yes, what were those views and where were they made?

### Non-Industry Supported Research

3. Currently or in the past 24 months, have you been involved in a leadership role in any research project not already reported under Part B, Question 1, relevant to the topic of these guidelines, e.g., a research project funded by a nonprofit or governmental organization?

No

Yes, as described below:

Column 1 Name the entity funding the research.

Column 2 Describe the research project.

Column 3 Describe your role: (a) national or overall principal investigator, (b) member of a steering committee of a study that does not have a principal investigator, (c) site or local investigator. If other than these options, please describe.

Column 4 Indicate when your involvement ended, if applicable. (If your involvement has not yet ended, indicate "current" or "ongoing.")

Add rows as needed for each research project.

| <i>Funder</i> | <i>Description of Research</i> | <i>My Role</i> | <i>End Date</i> |
|---------------|--------------------------------|----------------|-----------------|
|               |                                |                |                 |

### Institutional Relationships

4. Could your compensation be affected by recommendations on this topic?

Don't know

No

Yes

If yes, please explain:

5. Do you generate revenues for your institution or employer by clinical activity, teaching, speaking, consulting, testifying, writing, or otherwise sharing your knowledge or opinions about this guideline topic?

Don't know

No

Yes

If yes, please explain:

6. Could your institution benefit or be harmed by guidelines on this topic?

Don't know

No

Yes

If yes, please explain:

### Career Advancement

7. How would you characterize the support you would receive from your primary mentor, institution, or other entities if your work on this panel or authorship of these guidelines generated a strong reaction from peers outside your institution?

### Involvement in Organizations With Relevant Policies, Positions, or Guidelines

8. Are you involved as an employee, volunteer, or member of any organization that has published or to your knowledge is currently developing policies, positions, or guidelines relevant to these ASH guidelines, e.g., clinical practice guidelines, appropriate use criteria, expert consensus statement, mission statement, advocacy statement, amicus brief, or legislature or legal testimony?

No

Yes, as described below:

Column 1 Name the organization.

Column 2 Describe or reference the relevant policy, position, or guidelines.

Column 3 Describe your role with the organization, including your involvement in developing, disseminating, or implementing the relevant policy, position, or guidelines.

Add rows as needed for each organization.

| <i>Organization</i> | <i>Relevant Policy Position</i> | <i>Your Role</i> |
|---------------------|---------------------------------|------------------|
|                     |                                 |                  |

#### Clinical Practice

9. Do you see patients clinically?

No

Yes

If yes, what is your primary specialty or subspecialty?

If yes, do you prescribe or otherwise recommend clinical interventions (e.g., screening or diagnostic tests, evaluations, treatments, procedures) that may be addressed by these guidelines?

No

Yes

If yes, please explain:

#### Other

10. Do you have other nonfinancial interests or relationships not described above that could be relevant to the work of developing these guidelines?

No

Yes

If yes, please describe:

### Expected Interests

11. Do you expect to enter into, within the next 24 months, any new **financial or nonfinancial interests** not described above that could be relevant to the work of developing these guidelines?

No

Yes

If yes, please describe:

## Section 2. Attestation of Compliance With Conflict of Interest Policies

In consideration of my participation on these guidelines, I hereby certify and agree that:

| <i>Policy</i>                                                                                                                                                                                                                                                                                                                                                                                                                                                                                                                                                                                                                                                                                                                                                                                                                                                                                                                                                                                                                                                                                                                                                                                                             | <i>Initials</i> |
|---------------------------------------------------------------------------------------------------------------------------------------------------------------------------------------------------------------------------------------------------------------------------------------------------------------------------------------------------------------------------------------------------------------------------------------------------------------------------------------------------------------------------------------------------------------------------------------------------------------------------------------------------------------------------------------------------------------------------------------------------------------------------------------------------------------------------------------------------------------------------------------------------------------------------------------------------------------------------------------------------------------------------------------------------------------------------------------------------------------------------------------------------------------------------------------------------------------------------|-----------------|
| I have reviewed and understand the ASH Principles and Policies on Conflict of Interest published on the ASH website at <a href="https://www.hematology.org/about/governance/conflict-of-interest">https://www.hematology.org/about/governance/conflict-of-interest</a> including the special Policy on Management of Conflicts in the Development of Clinical Practice Guidelines (“ASH Policy”).                                                                                                                                                                                                                                                                                                                                                                                                                                                                                                                                                                                                                                                                                                                                                                                                                         | YR              |
| I have disclosed and will continue to disclose completely all potential conflicts of interest for myself and for my partner or spouse, to the best of my ability and knowledge, in accordance with ASH Policy and this Disclosure Form.                                                                                                                                                                                                                                                                                                                                                                                                                                                                                                                                                                                                                                                                                                                                                                                                                                                                                                                                                                                   | YR              |
| To ensure completeness and avoid discrepancies, I have checked and periodically will check my financial disclosures against other published information, including from the U.S. Centers for Medicare and Medicaid Services’ Open Payments database (or similar non-U.S. database) and explain any discrepant information.                                                                                                                                                                                                                                                                                                                                                                                                                                                                                                                                                                                                                                                                                                                                                                                                                                                                                                | YR              |
| <p>Until submission of the guidelines for publication, I understand and agree that without special exception from ASH, any of the following will disqualify me from continued participation and I will not enter into:</p> <ul style="list-style-type: none"> <li>• Any <b>direct financial interest</b> of myself or my partner or spouse in any <b>for-profit healthcare company or companies</b>, if such interests in aggregate may be reasonably valued to be &gt;\$5,000/year, regardless of relevance to the guidelines</li> <li>• Any noneducational speaking by myself on behalf of any <b>for-profit healthcare company</b> (e.g., service on a company “speakers bureau”), regardless of relevance to the guidelines</li> <li>• Consulting or advising about the marketing of products by any <b>for-profit healthcare company</b> (e.g., service on a company “advisory board”), regardless of relevance to the guidelines</li> <li>• Simultaneous participation on guidelines by another organization on the same topic</li> <li>• Any <i>undisclosed</i> financial interest in any <b>for-profit healthcare company</b> occurring in the 24 months prior to my participation on these guidelines</li> </ul> | YR              |
| I understand that if a disqualifying interest is reported, the usual course of action will be dismissal from participation and acknowledgment within the guideline publication rather than authorship.                                                                                                                                                                                                                                                                                                                                                                                                                                                                                                                                                                                                                                                                                                                                                                                                                                                                                                                                                                                                                    | YR              |
| At regular intervals during the guideline development process, as determined by ASH, I will review my information in this Disclosure Form; provide updated disclosures; and, if requested, attest that I do not have any interests that should disqualify my participation.                                                                                                                                                                                                                                                                                                                                                                                                                                                                                                                                                                                                                                                                                                                                                                                                                                                                                                                                               | YR              |

|                                                                                                                                                                                                                             |    |
|-----------------------------------------------------------------------------------------------------------------------------------------------------------------------------------------------------------------------------|----|
| I agree to publish with the guidelines my complete disclosures, this agreement, and future attestations.                                                                                                                    | YR |
| I understand that for 1 year following initial publication of the guidelines, I am encouraged by ASH to avoid new conflicts of interest that could reduce trust in the guidelines, in accordance with my own best judgment. | YR |

Agreed by

Yetiani Roldan

Date

08/27/2020

### Section 3. ASH Review Prior to Participation

For ASH Internal Use Only

| <i>Name, Role</i>                                                      | <i>Date</i>     | <i>Management Notes</i> |
|------------------------------------------------------------------------|-----------------|-------------------------|
| Eddrika Russell, ASH staff                                             | August 27, 2020 |                         |
| Menaka Pai, MD, Ex Officio, ASH<br>Guideline Oversight<br>Subcommittee | August 28, 2020 | Participation Approved  |



## Section 4. Disclosures and Attestations During Participation

For ASH Internal Use Only

| <i>Disclosure or attestation</i> | <i>Date</i>      | <i>Reviewed by</i>     | <i>Management Notes</i>                                                                            |
|----------------------------------|------------------|------------------------|----------------------------------------------------------------------------------------------------|
| Attestation                      | June 29, 2021    | Russell                | Dr. Roldan agreed to continue to adhere to the policies described herein.                          |
| Attestation                      | October 5, 2021  | Russell                | Dr. Roldan agreed to continue to adhere to the policies described herein.                          |
| Attestation                      | January 18, 2022 | Deion Smith, ASH Staff | Dr. Roldan agreed to continue to adhere to the policies described herein. Updated name in profile. |
|                                  | March 30, 2022   | Smith                  | Dr. Roldan confirmed that all information in this form was correct.                                |

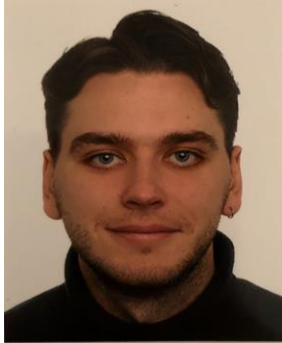

## Dr. Finn Schünemann, MD

Physician

Klinikum Lueneburg

Lueneburg, Germany

---

### Project

ASH Clinical Practice Guidelines on Anticoagulation in Patients with COVID-19

### Role

Review Team Member

### Profile

Dr. Finn Schünemann recently graduated from medical school in Germany. After a year of basic biology studies at RWTH University in Aachen, he started his medical education at the Paul Stradins University of Riga in Latvia and graduated from medical school at the Otto-von-Guericke University of Magdeburg in December 2019.

During an internship at McMaster University in Hamilton, Canada, in 2009 he worked at the Department of Clinical Epidemiology and Biostatistics for two months and gained first experience in research, especially in the field of health research methods. He started his doctoral research work with a focus on evaluating the quality of surgical guidelines and how to improve this quality in a joint project of the University Freiburg, Germany, and McMaster University; currently he is working in the public hospital of Lueneburg, Germany.

[July 17, 2020 profile approved by Dr. Schünemann. April 3, 2022 profile updated by Dr. Schünemann]

## Section 1. Disclosures Prior to Participation

### Definitions

**Conflict of interest**

A situation in which a reasonable person would consider that an individual’s judgments or actions regarding any aspect of the guideline development process is, or could be perceived to be, influenced by an outside interest

**Financial interest**

A position or relationship held by an individual that offers potential gain or loss of monetary value, such as employment, stock ownership, payment for services, or gifts given with the expectation of reciprocity

**Direct financial interest**

A financial interest that is owned by the individual or received directly by the individual

**Indirect financial interest**

A financial interest that is owned or received via an intermediary, e.g., research funding to an individual received through the individual’s academic institution

**For-profit healthcare company**

“A for-profit entity that develops, produces, markets, or distributes drugs, devices, services, or therapies used to diagnose, treat, monitor, manage, and alleviate health conditions. This definition is not intended to include non-profit entities, entities outside of the healthcare sector, or entities through which physicians provide clinical services directly to patients” (Council of Medical Specialty Societies’ “Code for Interactions With Industry” 2015). This definition is furthermore not viewed by ASH to include companies that provide accredited continuing medical education or that publish scientific or educational content.

### Part A. Direct Financial Interests

#### Employment With For-Profit Healthcare Companies

1. Are you currently or in the past 24 months have you been an employee of any **for-profit healthcare company**?

No

Yes, as described below:

Add rows as needed for each employment relationship.

| <i>Company</i> | <i>Description</i> | <i>End Date</i> | <i>For ASH Internal Use</i> |
|----------------|--------------------|-----------------|-----------------------------|
|                |                    |                 |                             |

### Equity in For-Profit Healthcare Companies

2. Do you currently or in the past 24 months have you had equity in any **for-profit healthcare company**? Equity includes stock, stock options, and other ownership interests but excludes diversified mutual fund shares.

No

Yes, as described below:

Add rows as needed for each equity interest.

| <i>Company</i> | <i>Description</i> | <i>Date Divested</i> | <i>For ASH Internal Use</i> |
|----------------|--------------------|----------------------|-----------------------------|
|                |                    |                      |                             |

### Healthcare-Related Patents, Royalties, and Other Intellectual Property

3. Do you currently or in the past 24 months have you owned patents for or received royalties from any intellectual property or product used to diagnose, treat, monitor, manage, or alleviate health conditions?

No

Yes, as described below:

Add rows as needed for each patent or royalty interest.

| <i>Company</i> | <i>Description</i> | <i>Date Divested</i> | <i>For ASH Internal Use</i> |
|----------------|--------------------|----------------------|-----------------------------|
|                |                    |                      |                             |

### Personal Income or Other Direct Transfers of Value From For-Profit Healthcare Companies

4. Do you currently or in the past 24 months have you received any personal income or other direct transfers of value (e.g., honoraria, gifts, travel support, meeting registration, meals) from any **for-profit healthcare company**?

No

Yes, as described below:

Column 1 Name the company.

Column 2 Describe the activity for which you received the income or other transfer of value, e.g., research, consultancy, speakers bureau involvement, service on an advisory committee or board, expert testimony.

Column 3 Indicate when the activity ended, if applicable. (If the activity has not yet ended, indicate “current” or “ongoing.”)

Add rows as needed for each activity.

| <i>Company</i> | <i>Description</i> | <i>End Date</i> | <i>For ASH Internal Use</i> |
|----------------|--------------------|-----------------|-----------------------------|
|                |                    |                 |                             |

#### My Partner’s or Spouse’s Interests

5. Currently or in the past 24 months has *your partner or spouse* had any of the interests or relationships described in questions 1-4?

No

Yes, as described below:

Add rows as needed for each interest.

| <i>Company</i> | <i>Description</i> | <i>End Date</i> | <i>For ASH Internal Use</i> |
|----------------|--------------------|-----------------|-----------------------------|
|                |                    |                 |                             |

#### Other Relevant Direct Financial Interests

6. Do you have other current or recent (within the past 24 months) **direct financial interests** with any institution, organization, entity or individual that could be relevant to the work of developing these guidelines?

No

Yes

If yes, please explain:

## Part B. Indirect Financial Interests

### Institutional Research Funded by For-Profit Healthcare Companies

1. Through your institution, do you currently or in the past 24 months have you been involved in research funded or supported (e.g., in kind support, such as provision of a study drug) by any **for-profit healthcare company**?

No

Yes, as described below:

Column 1 Name the company funding or supporting the research.

Column 2 Briefly describe the research project.

Column 3 Describe your role: (a) national or overall principal investigator, (b) member of a steering committee of a study that does not have a principal investigator, (c) site or local investigator. If other than these options, please describe.

Column 4 Indicate when your involvement ended, if applicable. (If your involvement has not yet ended, indicate “current” or “ongoing.”)

Add rows as needed for each research project.

| <i>Company</i> | <i>Description of Research</i> | <i>My Role</i> | <i>End Date</i> | <i>For ASH Internal Use</i> |
|----------------|--------------------------------|----------------|-----------------|-----------------------------|
|                |                                |                |                 |                             |

### Paid and Volunteer Activities for Organizations Supported by For-Profit Healthcare Companies

2. Do you currently or in the past 24 months have you been involved in any volunteer or paid work for an organization that is wholly or partially funded by any **for-profit healthcare company**?

No

Yes, as described below:

Column 1 Name the organization. If known to you, describe any industry funding or support.

Column 2 Briefly describe your activity and role, e.g., employment, service on board of directors, other volunteer services.

Column 3 Indicate if your activity was paid or volunteered.

Column 4 Indicate when your involvement with the organization ended. (If your involvement has not yet ended, indicate “current” or “ongoing.”)

Add rows as needed for each organization.

| <i>Organization</i> | <i>Description and role</i> | <i>Paid or Unpaid?</i> | <i>End Date</i> | <i>For ASH Internal Use</i> |
|---------------------|-----------------------------|------------------------|-----------------|-----------------------------|
|                     |                             |                        |                 |                             |

Other Relevant Indirect Financial Interests

3. Do you have other **indirect financial interests** with any: (i) **for-profit healthcare** company; or (ii) other institution, organization, entity or individual that could be relevant to the work of developing these guidelines?

No

Yes

If yes, please explain:

## Part C. Relevant Other Interests That Are Not Mainly Financial

### Personal Beliefs

1. Do you have strongly held beliefs related to the topic of these guidelines?

No

Yes

If yes, please explain:

### Previously Published Opinions

2. Have you ever authored, coauthored, or publicly provided an opinion related to the topic of these guidelines, e.g., a clinical practice guideline, textbook, review article, meeting poster or presentation, grand rounds talk, letter to the editor?

No

Yes

If yes, what were those views and where were they made?

### Non-Industry Supported Research

3. Currently or in the past 24 months, have you been involved in a leadership role in any research project not already reported under Part B, Question 1, relevant to the topic of these guidelines, e.g., a research project funded by a nonprofit or governmental organization?

No

Yes, as described below:

Column 1 Name the entity funding the research.

Column 2 Describe the research project.

Column 3 Describe your role: (a) national or overall principal investigator, (b) member of a steering committee of a study that does not have a principal investigator, (c) site or local investigator. If other than these options, please describe.

Column 4 Indicate when your involvement ended, if applicable. (If your involvement has not yet ended, indicate "current" or "ongoing.")

Add rows as needed for each research project.

| <i>Funder</i> | <i>Description of Research</i> | <i>My Role</i> | <i>End Date</i> |
|---------------|--------------------------------|----------------|-----------------|
|               |                                |                |                 |



### Institutional Relationships

4. Could your compensation be affected by recommendations on this topic?

Don't know

No

Yes

If yes, please explain:

5. Do you generate revenues for your institution or employer by clinical activity, teaching, speaking, consulting, testifying, writing, or otherwise sharing your knowledge or opinions about this guideline topic?

Don't know

No

Yes

If yes, please explain:

6. Could your institution benefit or be harmed by guidelines on this topic?

Don't know

No

Yes

If yes, please explain:

### Career Advancement

7. How would you characterize the support you would receive from your primary mentor, institution, or other entities if your work on this panel or authorship of these guidelines generated a strong reaction from peers outside your institution?

Likely positive support, primary mentor is part of the developing group for this guideline.

### Involvement in Organizations With Relevant Policies, Positions, or Guidelines

8. Are you involved as an employee, volunteer, or member of any organization that has published or to your knowledge is currently developing policies, positions, or guidelines relevant to these ASH

guidelines, e.g., clinical practice guidelines, appropriate use criteria, expert consensus statement, mission statement, advocacy statement, amicus brief, or legislature or legal testimony?

No

Yes, as described below:

Column 1 Name the organization.

Column 2 Describe or reference the relevant policy, position, or guidelines.

Column 3 Describe your role with the organization, including your involvement in developing, disseminating, or implementing the relevant policy, position, or guidelines.

Add rows as needed for each organization.

| <i>Organization</i> | <i>Relevant Policy Position</i>                                                                                              | <i>Your Role</i>                   |
|---------------------|------------------------------------------------------------------------------------------------------------------------------|------------------------------------|
| McMaster University | NIV living systematic review on COVID19; living systematic review on distancing, masks and eye protection related to COVID19 | Part of the systematic review team |

#### Clinical Practice

9. Do you see patients clinically?

No

Yes

If yes, what is your primary specialty or subspecialty?

If yes, do you prescribe or otherwise recommend clinical interventions (e.g., screening or diagnostic tests, evaluations, treatments, procedures) that may be addressed by these guidelines?

No

Yes

If yes, please explain:

#### Other

10. Do you have other nonfinancial interests or relationships not described above that could be relevant to the work of developing these guidelines?

No

Yes

If yes, please describe:

#### Expected Interests

11. Do you expect to enter into, within the next 24 months, any new **financial or nonfinancial interests** not described above that could be relevant to the work of developing these guidelines?

No

Yes

If yes, please describe:

## Section 2. Attestation of Compliance With Conflict of Interest Policies

In consideration of my participation on these guidelines, I hereby certify and agree that:

| <i>Policy</i>                                                                                                                                                                                                                                                                                                                                                                                                                                                                                                                                                                                                                                                                                                                                                                                                                                                                                                                                                                                                                                                                                                                                                                                                             | <i>Initials</i> |
|---------------------------------------------------------------------------------------------------------------------------------------------------------------------------------------------------------------------------------------------------------------------------------------------------------------------------------------------------------------------------------------------------------------------------------------------------------------------------------------------------------------------------------------------------------------------------------------------------------------------------------------------------------------------------------------------------------------------------------------------------------------------------------------------------------------------------------------------------------------------------------------------------------------------------------------------------------------------------------------------------------------------------------------------------------------------------------------------------------------------------------------------------------------------------------------------------------------------------|-----------------|
| I have reviewed and understand the ASH Principles and Policies on Conflict of Interest published on the ASH website at <a href="https://www.hematology.org/about/governance/conflict-of-interest">https://www.hematology.org/about/governance/conflict-of-interest</a> including the special Policy on Management of Conflicts in the Development of Clinical Practice Guidelines (“ASH Policy”).                                                                                                                                                                                                                                                                                                                                                                                                                                                                                                                                                                                                                                                                                                                                                                                                                         | FS              |
| I have disclosed and will continue to disclose completely all potential conflicts of interest for myself and for my partner or spouse, to the best of my ability and knowledge, in accordance with ASH Policy and this Disclosure Form.                                                                                                                                                                                                                                                                                                                                                                                                                                                                                                                                                                                                                                                                                                                                                                                                                                                                                                                                                                                   | FS              |
| To ensure completeness and avoid discrepancies, I have checked and periodically will check my financial disclosures against other published information, including from the U.S. Centers for Medicare and Medicaid Services’ Open Payments database (or similar non-U.S. database) and explain any discrepant information.                                                                                                                                                                                                                                                                                                                                                                                                                                                                                                                                                                                                                                                                                                                                                                                                                                                                                                | FS              |
| <p>Until submission of the guidelines for publication, I understand and agree that without special exception from ASH, any of the following will disqualify me from continued participation and I will not enter into:</p> <ul style="list-style-type: none"> <li>• Any <b>direct financial interest</b> of myself or my partner or spouse in any <b>for-profit healthcare company or companies</b>, if such interests in aggregate may be reasonably valued to be &gt;\$5,000/year, regardless of relevance to the guidelines</li> <li>• Any noneducational speaking by myself on behalf of any <b>for-profit healthcare company</b> (e.g., service on a company “speakers bureau”), regardless of relevance to the guidelines</li> <li>• Consulting or advising about the marketing of products by any <b>for-profit healthcare company</b> (e.g., service on a company “advisory board”), regardless of relevance to the guidelines</li> <li>• Simultaneous participation on guidelines by another organization on the same topic</li> <li>• Any <i>undisclosed</i> financial interest in any <b>for-profit healthcare company</b> occurring in the 24 months prior to my participation on these guidelines</li> </ul> | FS              |
| I understand that if a disqualifying interest is reported, the usual course of action will be dismissal from participation and acknowledgment within the guideline publication rather than authorship.                                                                                                                                                                                                                                                                                                                                                                                                                                                                                                                                                                                                                                                                                                                                                                                                                                                                                                                                                                                                                    | FS              |
| At regular intervals during the guideline development process, as determined by ASH, I will review my information in this Disclosure Form; provide updated disclosures; and, if requested, attest that I do not have any interests that should disqualify my participation.                                                                                                                                                                                                                                                                                                                                                                                                                                                                                                                                                                                                                                                                                                                                                                                                                                                                                                                                               | FS              |

|                                                                                                                                                                                                                             |    |
|-----------------------------------------------------------------------------------------------------------------------------------------------------------------------------------------------------------------------------|----|
| I agree to publish with the guidelines my complete disclosures, this agreement, and future attestations.                                                                                                                    | FS |
| I understand that for 1 year following initial publication of the guidelines, I am encouraged by ASH to avoid new conflicts of interest that could reduce trust in the guidelines, in accordance with my own best judgment. | FS |

Agreed by

Finn Schünemann

Date

June 27, 2020

### Section 3. ASH Review Prior to Participation

For ASH Internal Use Only

| <i>Name, Role</i>                                                     | <i>Date</i>   | <i>Management Notes</i> |
|-----------------------------------------------------------------------|---------------|-------------------------|
| Eddrika Russell, ASH staff                                            | June 27, 2020 |                         |
| Menaka Pai, MD, Ex Officio ASH<br>Guideline Oversight<br>Subcommittee | July 15, 2020 | Participation approved  |

## Section 4. Disclosures and Attestations During Participation

For ASH Internal Use Only

| <i>Disclosure or attestation</i> | <i>Date</i>     | <i>Reviewed by</i>     | <i>Management Notes</i>                                                |
|----------------------------------|-----------------|------------------------|------------------------------------------------------------------------|
| Attestation                      | July 3, 2021    | Russell                | Dr. Schünemann agreed to adhere to the policies described herein.      |
| Attestation                      | October 3, 2021 | Russell                | Dr. Schünemann agreed to adhere to the policies described herein.      |
|                                  | April 3, 2022   | Deion Smith, ASH Staff | Dr. Schünemann confirmed that all information in this form is correct. |



ASH Clinical Practice Guidelines  
Participant Information

---

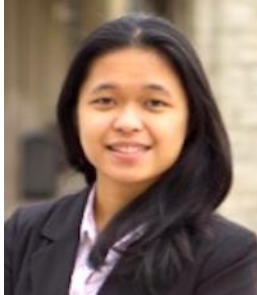

Karla Solo, MSc

Research Coordinator

McMaster University

Hamilton, Ontario, Canada

---

### Project

ASH Clinical Practice Guidelines on Anticoagulation in Patients with COVID-19

### Role

Review Team Member

### Profile

Karla Solo (MSc) is a research coordinator at the Michael G. DeGroot Cochrane Canada Centre and MacGRADE Centre in the Department of Health Research Methods, Evidence, and Impact (HEI) at McMaster University, Hamilton, Canada. Her primary research interests focus on systematic reviews and clinical practice guideline development. She has a particular interest in data linkage that facilitates automated process for generating high-quality research evidence.

[July 17, 2020 profile approved by Ms. Solo]



## Section 1. Disclosures Prior to Participation

### Definitions

|                                             |                                                                                                                                                                                                                                                                                                                                                                                                                                                                                                                                                                                                                                                             |
|---------------------------------------------|-------------------------------------------------------------------------------------------------------------------------------------------------------------------------------------------------------------------------------------------------------------------------------------------------------------------------------------------------------------------------------------------------------------------------------------------------------------------------------------------------------------------------------------------------------------------------------------------------------------------------------------------------------------|
| <b><i>Conflict of interest</i></b>          | A situation in which a reasonable person would consider that an individual’s judgments or actions regarding any aspect of the guideline development process is, or could be perceived to be, influenced by an outside interest                                                                                                                                                                                                                                                                                                                                                                                                                              |
| <b><i>Financial interest</i></b>            | A position or relationship held by an individual that offers potential gain or loss of monetary value, such as employment, stock ownership, payment for services, or gifts given with the expectation of reciprocity                                                                                                                                                                                                                                                                                                                                                                                                                                        |
| <b><i>Direct financial interest</i></b>     | A financial interest that is owned by the individual or received directly by the individual                                                                                                                                                                                                                                                                                                                                                                                                                                                                                                                                                                 |
| <b><i>Indirect financial interest</i></b>   | A financial interest that is owned or received via an intermediary, e.g., research funding to an individual received through the individual’s academic institution                                                                                                                                                                                                                                                                                                                                                                                                                                                                                          |
| <b><i>For-profit healthcare company</i></b> | “A for-profit entity that develops, produces, markets, or distributes drugs, devices, services, or therapies used to diagnose, treat, monitor, manage, and alleviate health conditions. This definition is not intended to include non-profit entities, entities outside of the healthcare sector, or entities through which physicians provide clinical services directly to patients” (Council of Medical Specialty Societies’ “Code for Interactions With Industry” 2015). This definition is furthermore not viewed by ASH to include companies that provide accredited continuing medical education or that publish scientific or educational content. |

### Part A. Direct Financial Interests

#### Employment With For-Profit Healthcare Companies

1. Are you currently or in the past 24 months have you been an employee of any **for-profit healthcare company**?

No

Yes, as described below:

Add rows as needed for each employment relationship.

| <i>Company</i> | <i>Description</i> | <i>End Date</i> | <i>For ASH Internal Use</i> |
|----------------|--------------------|-----------------|-----------------------------|
|                |                    |                 |                             |

### Equity in For-Profit Healthcare Companies

2. Do you currently or in the past 24 months have you had equity in any **for-profit healthcare company**? Equity includes stock, stock options, and other ownership interests but excludes diversified mutual fund shares.

No

Yes, as described below:

Add rows as needed for each equity interest.

| <i>Company</i> | <i>Description</i> | <i>Date Divested</i> | <i>For ASH Internal Use</i> |
|----------------|--------------------|----------------------|-----------------------------|
|                |                    |                      |                             |

### Healthcare-Related Patents, Royalties, and Other Intellectual Property

3. Do you currently or in the past 24 months have you owned patents for or received royalties from any intellectual property or product used to diagnose, treat, monitor, manage, or alleviate health conditions?

No

Yes, as described below:

Add rows as needed for each patent or royalty interest.

| <i>Company</i> | <i>Description</i> | <i>Date Divested</i> | <i>For ASH Internal Use</i> |
|----------------|--------------------|----------------------|-----------------------------|
|                |                    |                      |                             |

### Personal Income or Other Direct Transfers of Value From For-Profit Healthcare Companies

4. Do you currently or in the past 24 months have you received any personal income or other direct transfers of value (e.g., honoraria, gifts, travel support, meeting registration, meals) from any **for-profit healthcare company**?

No

Yes, as described below:

Column 1 Name the company.

Column 2 Describe the activity for which you received the income or other transfer of value, e.g., research, consultancy, speakers bureau involvement, service on an advisory committee or board, expert testimony.

Column 3 Indicate when the activity ended, if applicable. (If the activity has not yet ended, indicate "current" or "ongoing.")

Add rows as needed for each activity.

| <i>Company</i> | <i>Description</i> | <i>End Date</i> | <i>For ASH Internal Use</i> |
|----------------|--------------------|-----------------|-----------------------------|
|                |                    |                 |                             |

#### My Partner's or Spouse's Interests

5. Currently or in the past 24 months has *your partner or spouse* had any of the interests or relationships described in questions 1-4?

No

Yes, as described below:

Add rows as needed for each interest.

| <i>Company</i> | <i>Description</i> | <i>End Date</i> | <i>For ASH Internal Use</i> |
|----------------|--------------------|-----------------|-----------------------------|
|                |                    |                 |                             |

#### Other Relevant Direct Financial Interests

6. Do you have other current or recent (within the past 24 months) **direct financial interests** with any institution, organization, entity or individual that could be relevant to the work of developing these guidelines?

No

Yes

If yes, please explain:

## Part B. Indirect Financial Interests

### Institutional Research Funded by For-Profit Healthcare Companies

1. Through your institution, do you currently or in the past 24 months have you been involved in research funded or supported (e.g., in kind support, such as provision of a study drug) by any **for-profit healthcare company**?

No

Yes, as described below:

Column 1 Name the company funding or supporting the research.

Column 2 Briefly describe the research project.

Column 3 Describe your role: (a) national or overall principal investigator, (b) member of a steering committee of a study that does not have a principal investigator, (c) site or local investigator. If other than these options, please describe.

Column 4 Indicate when your involvement ended, if applicable. (If your involvement has not yet ended, indicate “current” or “ongoing.”)

Add rows as needed for each research project.

| <i>Company</i> | <i>Description of Research</i> | <i>My Role</i> | <i>End Date</i> | <i>For ASH Internal Use</i> |
|----------------|--------------------------------|----------------|-----------------|-----------------------------|
|                |                                |                |                 |                             |

### Paid and Volunteer Activities for Organizations Supported by For-Profit Healthcare Companies

2. Do you currently or in the past 24 months have you been involved in any volunteer or paid work for an organization that is wholly or partially funded by any **for-profit healthcare company**?

No

Yes, as described below:

Column 1 Name the organization. If known to you, describe any industry funding or support.

Column 2 Briefly describe your activity and role, e.g., employment, service on board of directors, other volunteer services.

Column 3 Indicate if your activity was paid or volunteered.

Column 4 Indicate when your involvement with the organization ended. (If your involvement has not yet ended, indicate “current” or “ongoing.”)

Add rows as needed for each organization.

| <i>Organization</i> | <i>Description and role</i> | <i>Paid or Unpaid?</i> | <i>End Date</i> | <i>For ASH Internal Use</i> |
|---------------------|-----------------------------|------------------------|-----------------|-----------------------------|
|                     |                             |                        |                 |                             |

Other Relevant Indirect Financial Interests

3. Do you have other **indirect financial interests** with any: (i) **for-profit healthcare** company; or (ii) other institution, organization, entity or individual that could be relevant to the work of developing these guidelines?

No

Yes

If yes, please explain:

## Part C. Relevant Other Interests That Are Not Mainly Financial

### Personal Beliefs

1. Do you have strongly held beliefs related to the topic of these guidelines?

No

Yes

If yes, please explain:

### Previously Published Opinions

2. Have you ever authored, coauthored, or publicly provided an opinion related to the topic of these guidelines, e.g., a clinical practice guideline, textbook, review article, meeting poster or presentation, grand rounds talk, letter to the editor?

No

Yes

If yes, what were those views and where were they made?

### Non-Industry Supported Research

3. Currently or in the past 24 months, have you been involved in a leadership role in any research project not already reported under Part B, Question 1, relevant to the topic of these guidelines, e.g., a research project funded by a nonprofit or governmental organization?

No

Yes, as described below:

Column 1 Name the entity funding the research.

Column 2 Describe the research project.

Column 3 Describe your role: (a) national or overall principal investigator, (b) member of a steering committee of a study that does not have a principal investigator, (c) site or local investigator. If other than these options, please describe.

Column 4 Indicate when your involvement ended, if applicable. (If your involvement has not yet ended, indicate "current" or "ongoing.")

Add rows as needed for each research project.

| <i>Funder</i> | <i>Description of Research</i> | <i>My Role</i> | <i>End Date</i> |
|---------------|--------------------------------|----------------|-----------------|
|               |                                |                |                 |

### Institutional Relationships

4. Could your compensation be affected by recommendations on this topic?

Don't know

No

Yes

If yes, please explain:

5. Do you generate revenues for your institution or employer by clinical activity, teaching, speaking, consulting, testifying, writing, or otherwise sharing your knowledge or opinions about this guideline topic?

Don't know

No

Yes

If yes, please explain:

6. Could your institution benefit or be harmed by guidelines on this topic?

Don't know

No

Yes

If yes, please explain:

### Career Advancement

7. How would you characterize the support you would receive from your primary mentor, institution, or other entities if your work on this panel or authorship of these guidelines generated a strong reaction from peers outside your institution?

Research publications may lead to career advancement.

### Involvement in Organizations With Relevant Policies, Positions, or Guidelines

8. Are you involved as an employee, volunteer, or member of any organization that has published or to your knowledge is currently developing policies, positions, or guidelines relevant to these ASH guidelines, e.g., clinical practice guidelines, appropriate use criteria, expert consensus statement, mission statement, advocacy statement, amicus brief, or legislature or legal testimony?

No

Yes, as described below:

Column 1 Name the organization.

Column 2 Describe or reference the relevant policy, position, or guidelines.

Column 3 Describe your role with the organization, including your involvement in developing, disseminating, or implementing the relevant policy, position, or guidelines.

Add rows as needed for each organization.

| <i>Organization</i> | <i>Relevant Policy Position</i> | <i>Your Role</i> |
|---------------------|---------------------------------|------------------|
|                     |                                 |                  |

#### Clinical Practice

9. Do you see patients clinically?

No

Yes

If yes, what is your primary specialty or subspecialty?

If yes, do you prescribe or otherwise recommend clinical interventions (e.g., screening or diagnostic tests, evaluations, treatments, procedures) that may be addressed by these guidelines?

No

Yes

If yes, please explain:

#### Other

10. Do you have other nonfinancial interests or relationships not described above that could be relevant to the work of developing these guidelines?

No

Yes

If yes, please describe:



### Expected Interests

11. Do you expect to enter into, within the next 24 months, any new **financial or nonfinancial interests** not described above that could be relevant to the work of developing these guidelines?

No

Yes

If yes, please describe:

## Section 2. Attestation of Compliance With Conflict of Interest Policies

In consideration of my participation on these guidelines, I hereby certify and agree that:

| <i>Policy</i>                                                                                                                                                                                                                                                                                                                                                                                                                                                                                                                                                                                                                                                                                                                                                                                                                                                                                                                                                                                                                                                                                                                                                                                                             | <i>Initials</i> |
|---------------------------------------------------------------------------------------------------------------------------------------------------------------------------------------------------------------------------------------------------------------------------------------------------------------------------------------------------------------------------------------------------------------------------------------------------------------------------------------------------------------------------------------------------------------------------------------------------------------------------------------------------------------------------------------------------------------------------------------------------------------------------------------------------------------------------------------------------------------------------------------------------------------------------------------------------------------------------------------------------------------------------------------------------------------------------------------------------------------------------------------------------------------------------------------------------------------------------|-----------------|
| I have reviewed and understand the ASH Principles and Policies on Conflict of Interest published on the ASH website at <a href="https://www.hematology.org/about/governance/conflict-of-interest">https://www.hematology.org/about/governance/conflict-of-interest</a> including the special Policy on Management of Conflicts in the Development of Clinical Practice Guidelines (“ASH Policy”).                                                                                                                                                                                                                                                                                                                                                                                                                                                                                                                                                                                                                                                                                                                                                                                                                         | KS              |
| I have disclosed and will continue to disclose completely all potential conflicts of interest for myself and for my partner or spouse, to the best of my ability and knowledge, in accordance with ASH Policy and this Disclosure Form.                                                                                                                                                                                                                                                                                                                                                                                                                                                                                                                                                                                                                                                                                                                                                                                                                                                                                                                                                                                   | KS              |
| To ensure completeness and avoid discrepancies, I have checked and periodically will check my financial disclosures against other published information, including from the U.S. Centers for Medicare and Medicaid Services’ Open Payments database (or similar non-U.S. database) and explain any discrepant information.                                                                                                                                                                                                                                                                                                                                                                                                                                                                                                                                                                                                                                                                                                                                                                                                                                                                                                | KS              |
| <p>Until submission of the guidelines for publication, I understand and agree that without special exception from ASH, any of the following will disqualify me from continued participation and I will not enter into:</p> <ul style="list-style-type: none"> <li>• Any <b>direct financial interest</b> of myself or my partner or spouse in any <b>for-profit healthcare company or companies</b>, if such interests in aggregate may be reasonably valued to be &gt;\$5,000/year, regardless of relevance to the guidelines</li> <li>• Any noneducational speaking by myself on behalf of any <b>for-profit healthcare company</b> (e.g., service on a company “speakers bureau”), regardless of relevance to the guidelines</li> <li>• Consulting or advising about the marketing of products by any <b>for-profit healthcare company</b> (e.g., service on a company “advisory board”), regardless of relevance to the guidelines</li> <li>• Simultaneous participation on guidelines by another organization on the same topic</li> <li>• Any <i>undisclosed</i> financial interest in any <b>for-profit healthcare company</b> occurring in the 24 months prior to my participation on these guidelines</li> </ul> | KS              |
| I understand that if a disqualifying interest is reported, the usual course of action will be dismissal from participation and acknowledgment within the guideline publication rather than authorship.                                                                                                                                                                                                                                                                                                                                                                                                                                                                                                                                                                                                                                                                                                                                                                                                                                                                                                                                                                                                                    | KS              |
| At regular intervals during the guideline development process, as determined by ASH, I will review my information in this Disclosure Form; provide updated disclosures; and, if requested, attest that I do not have any interests that should disqualify my participation.                                                                                                                                                                                                                                                                                                                                                                                                                                                                                                                                                                                                                                                                                                                                                                                                                                                                                                                                               | KS              |

|                                                                                                                                                                                                                             |    |
|-----------------------------------------------------------------------------------------------------------------------------------------------------------------------------------------------------------------------------|----|
| I agree to publish with the guidelines my complete disclosures, this agreement, and future attestations.                                                                                                                    | KS |
| I understand that for 1 year following initial publication of the guidelines, I am encouraged by ASH to avoid new conflicts of interest that could reduce trust in the guidelines, in accordance with my own best judgment. | KS |

Agreed by

Karla Solo

Date

July 13, 2020

### Section 3. ASH Review Prior to Participation

For ASH Internal Use Only

| <i>Name, Role</i>                                                     | <i>Date</i>   | <i>Management Notes</i> |
|-----------------------------------------------------------------------|---------------|-------------------------|
| Eddrika Russell, ASH Staff                                            | July 13, 2020 |                         |
| Menaka Pai, MD, Ex Officio ASH<br>Guideline Oversight<br>Subcommittee | July 16, 2020 | Participation approved  |

## Section 4. Disclosures and Attestations During Participation

For ASH Internal Use Only

| <i>Disclosure or attestation</i> | <i>Date</i>      | <i>Reviewed by</i>     | <i>Management Notes</i>                                          |
|----------------------------------|------------------|------------------------|------------------------------------------------------------------|
| Attestation                      | June 29, 2021    | Russell                | Ms. Solo agreed to adhere to the policies described herein.      |
| Attestation                      | October 2, 2021  | Russell                | Ms. Solo agreed to adhere to the policies described herein.      |
| Attestation                      | January 23, 2022 | Deion Smith, ASH Staff | Ms. Solo agreed to adhere to the policies described herein.      |
|                                  | March 30, 2022   | Smith                  | Ms. Solo confirmed that all information in this form is correct. |
